# Supplementary material for: Dual-membrane bioinspired nanocarriers for targeted therapy of MRSA-induced acute lung injury and bacteremia
Source: Royal Society of Chemistry journal article supplement (doi:10.1039/d4tb02742f), 2025-01-01
Supplement: d4tb02742f5.pdf [file d4tb02742f5.pdf]

**600 ng/ml**

**75 ng/ml**

**37.5 ng/ml**

**9.4 ng/ml**

**37.5 ng/ml**
