# Supplementary material for: Dual-membrane bioinspired nanocarriers for targeted therapy of MRSA-induced acute lung injury and bacteremia
Source: Royal Society of Chemistry journal article supplement (doi:10.1039/d4tb02742f), 2025-01-01
Supplement: d4tb02742f8.xlsx [file d4tb02742f8.xlsx]

## Sheet: Description of Column Title
												Abundance: Description of Column Title	Abundances Count: Description of Column Title	Relative abundance (%)	Relative abundance (%)	Relative abundance (%)	Relative abundance (%)	Relative abundance (%)	Relative abundance (%)	Relative abundance (%)	Relative abundance (%)	Relative abundance (%)	Relative abundance (%)	Relative abundance (%)	Relative abundance (%)	Relative abundance (%)	Relative abundance (%)	Relative abundance (%)	Relative abundance (%)	Relative abundance (%)	Relative abundance (%)	Relative abundance (%)	Relative abundance (%)	Relative abundance (%)	Relative abundance (%)	Relative abundance (%)	Relative abundance (%)	Relative abundance (%)	Relative abundance (%)	Relative abundance (%)	Relative abundance (%)	Relative abundance (%)	Relative abundance (%)	Relative abundance (%)	Relative abundance (%)	Relative abundance (%)	Relative abundance (%)	Relative abundance (%)	Relative abundance (%)
Protein Level
Column name	Description
Accession	Protein accession number in used sequence database
Description	Protein name
Coverage [%]	The percentage of the protein sequences covered by identified peptides
# AAs	The length of the protein sequence.
MW [kDa]	Molecular weight of identified protein
calc. pI	Displays the theoretically calculated isoelectric point for the protein, which is the pH at which a particular molecule carries no net electrical charge.
Exp. q-value	Experimental q-value. Display protein FDR (false disvoery rate) based on target and decoy database.
Score Mascot: Mascot	Ion scores of Mascot search algorithm. Protein score (MudPIT score), sum of the scores of peptides.
# Protein Groups	The total number of protein groups.
# Unique Peptides	The total number of distinct peptide sequences unique to the protein group
# Peptides	Total number of identified peptides unique to a protein group
# PSMs	The number of identified peptide spectrum matches identified from all included searches, including those redundantly identified.
Abundance	Displays the abundance values of the samples before scaling and normalization.(Summation of its associated and used peptide group abundances)
Abundances Count	The number of peptide group abundances used for calculating abundances.
Relative protein abundance [%]	Estimated protein abundance by spectrum counting: #PSM / (#Total PSM) * 100.
Peptide Level
Column name	Description
Master Protein Accessions	The unique identifiers (accessions) of all master proteins from all protein groups that include the given peptide sequence.
Master Protein Descriptions	The description of the master proteins.
Sequence	Displays the identified peptide sequence from the master protein.
# PSMs	Displays the total number of identified PSMs in the peptide group, including those redundantly identified.
# Missed Cleavages	The number of cleavage sites in a peptide sequence that a cleavage reagent (enzyme) did not cleave.
Theo. MH+ [Da]	Displays the mass calculated from the sequence, the amino acid masses, and the defined modification masses, as opposed to the measured mass.
m/z [Da] (by Search Engine): Mascot	The mass-to-charge ratio of the precursor ion, in daltons.
DeltaM [ppm] (by Search Engine): Mascot	The difference between the theoretical mass of the peptide and the experimental mass of the precursor ion, in parts per million.
Ions Score (by Search Engine): Mascot	Ion scores of Mascot search algorithm for peptide-spectrum match
Top Apex RT [min]	The best apex retention time over all connected consensus features
Modifications	Displays all the PTMs identified for the given peptide.
Qvality q-value	The q-value for the identified peptide group.
# Proteins	The number of proteins containing this peptide
# Protein Groups	The number of protein groups containing the peptide
Abundance	Displays the abundances of the samples before scaling and normalization. (Summation of its associated and used Quan Spectra abundances)
Abundances Count	The number of PSM abundances used for calculating the peptide group abundances
Sequence in Protein	Displays the identified peptide sequence with the flanking residues (divided by "dot") from the master protein.
Positions in Master Proteins	Displays the positions of the peptide in the master protein.
Quan Usage	Displays the peptide was used for quantification of protein abundance
Quan Ratio Usage	Displays the peptide was used for quantification of protein abundance ratio
[truncated: 227 more columns]

## Sheet: NE
Accession	Description	Coverage [%]	# AAs	MW [kDa]	calc. pI	Exp. q-value: Combined	Score Mascot: Mascot	# Protein Groups	# Unique Peptides	# Peptides	# PSMs	Abundance: NE	Abundances Count: NE	Relative abundance (%)
P59665	Neutrophil defensin 1 OS=Homo sapiens OX=9606 GN=DEFA1B PE=1 SV=1	20	94	10.2	6.99	0	1691	1	4	4	184	2.21744e+09	4	0.052169
	Master Protein Accessions	Master Protein Descriptions	Sequence	# PSMs	# Missed Cleavages	Theo. MH+ [Da]	m/z [Da] (by Search Engine): Mascot	DeltaM [ppm] (by Search Engine): Mascot	Ions Score (by Search Engine): Mascot	Top Apex RT [min]	Modifications	Qvality q-value	# Proteins		# Protein Groups	Abundance: F1764: n/a, Sample, n/a, n/a	Abundances Count: F1764: n/a, Sample, n/a, n/a	Sequence in Protein	Positions in Proteins	Quan Usage	Quan Ratio Usage
	P59665	Neutrophil defensin 1 OS=Homo sapiens OX=9606 GN=DEFA1B PE=1 SV=1	RYGTCIYQGR	18	1	1273.61	425.208	-0.62	21	20.4	1xCarbamidomethyl [C5]	0.00165393	2		1	212361171	6	R.RYGTCIYQGR.L	[79-88]	Used	Used
	P59665	Neutrophil defensin 1 OS=Homo sapiens OX=9606 GN=DEFA1B PE=1 SV=1	IPACIAGER	2	0	986.509	493.758	-0.31	60	21.23	1xCarbamidomethyl [C4]	0.00165393	2		1	275041312	1	R.IPACIAGER.R	[70-78]	Used	Used
	P59665	Neutrophil defensin 1 OS=Homo sapiens OX=9606 GN=DEFA1B PE=1 SV=1	IPACIAGERR	89	1	1142.61	571.809	0.39	23	19.01	1xCarbamidomethyl [C4]	0.00165393	2		1	1.29336e+09	31	R.IPACIAGERR.Y	[70-79]	Used	Used
	P59665	Neutrophil defensin 1 OS=Homo sapiens OX=9606 GN=DEFA1B PE=1 SV=1	YGTCIYQGR	75	0	1117.51	559.258	0.18	63	21.48	1xCarbamidomethyl [C4]	0.00165393	2		1	4.36678e+08	20	R.YGTCIYQGR.L	[80-88]	Used	Used
P06702	Protein S100-A9 OS=Homo sapiens OX=9606 GN=S100A9 PE=1 SV=1	56	114	13.2	6.13	0	2194	1	10	10	269	1.22495e+09	11	0.0762688
	Master Protein Accessions	Master Protein Descriptions	Sequence	# PSMs	# Missed Cleavages	Theo. MH+ [Da]	m/z [Da] (by Search Engine): Mascot	DeltaM [ppm] (by Search Engine): Mascot	Ions Score (by Search Engine): Mascot	Top Apex RT [min]	Modifications	Qvality q-value	# Proteins		# Protein Groups	Abundance: F1764: n/a, Sample, n/a, n/a	Abundances Count: F1764: n/a, Sample, n/a, n/a	Sequence in Protein	Positions in Proteins	Quan Usage	Quan Ratio Usage
	P06702	Protein S100-A9 OS=Homo sapiens OX=9606 GN=S100A9 PE=1 SV=1	NIETIINTFHQYSVK	13	0	1806.94	903.972	-1.1	51	50.95		0.00165393	1		1	7.2126e+07	2	R.NIETIINTFHQYSVK.L	[11-25]	Used	Used
	P06702	Protein S100-A9 OS=Homo sapiens OX=9606 GN=S100A9 PE=1 SV=1	LGHPDTLNQGEFK	35	0	1455.72	728.365	-0.4	49	23.74		0.00165393	1		1	2.31841e+08	9	K.LGHPDTLNQGEFK.E	[26-38]	Used	Used
	P06702	Protein S100-A9 OS=Homo sapiens OX=9606 GN=S100A9 PE=1 SV=1	LGHPDTLNQGEFKELVR	69	1	1953.02	977.013	0.05	57	34.18		0.00165393	1		1	2.41892e+08	13	K.LGHPDTLNQGEFKELVR.K	[26-42]	Used	Used
	P06702	Protein S100-A9 OS=Homo sapiens OX=9606 GN=S100A9 PE=1 SV=1	LGHPDTLNQGEFKELVRK	62	2	2081.11	694.376	0.25	33	43.04		0.00165393	1		1	3.9644e+07	21	K.LGHPDTLNQGEFKELVRK.D	[26-43]	Used	Used
	P06702	Protein S100-A9 OS=Homo sapiens OX=9606 GN=S100A9 PE=1 SV=1	LTWASHEK	8	0	971.495	486.251	-0.06	27	19.81		0.00165393	1		1	110532168	1	R.LTWASHEK.M	[86-93]	Used	Used
	P06702	Protein S100-A9 OS=Homo sapiens OX=9606 GN=S100A9 PE=1 SV=1	VIEHIMEDLDTNADK	8	0	1742.83	581.614	0.33	62	34.04		0.00165393	1		1	44522116	2	K.VIEHIMEDLDTNADK.Q	[58-72]	Used	Used
	P06702	Protein S100-A9 OS=Homo sapiens OX=9606 GN=S100A9 PE=1 SV=1	VIEHIMEDLDTNADK	2	0	1758.82	879.914	-0.48	73	25.41	1xOxidation [M6]	0.00165393	1		1	2.58546e+06	1	K.VIEHIMEDLDTNADK.Q	[58-72]	Used	Used
	P06702	Protein S100-A9 OS=Homo sapiens OX=9606 GN=S100A9 PE=1 SV=1	DLQNFLK	2	0	877.478	439.243	0.06	38	37.57		0.00165393	1		1	28190314	1	K.DLQNFLK.K	[44-50]	Used	Used
	P06702	Protein S100-A9 OS=Homo sapiens OX=9606 GN=S100A9 PE=1 SV=1	KDLQNFLK	9	1	1005.57	503.29	0.07	41	31.57		0.00165393	1		1	280725760	1	R.KDLQNFLK.K	[43-50]	Used	Used
	P06702	Protein S100-A9 OS=Homo sapiens OX=9606 GN=S100A9 PE=1 SV=1	KDLQNFLKK	54	2	1133.67	567.337	-0.1	29	28.07		0.00165393	1		1	1.59586e+08	16	R.KDLQNFLKK.E	[43-51]	Used	Used
	P06702	Protein S100-A9 OS=Homo sapiens OX=9606 GN=S100A9 PE=1 SV=1	DLQNFLKK	7	1	1005.57	503.29	0.05	20	31.57		0.00456775	1		1	13303702	1	K.DLQNFLKK.E	[44-51]	Used	Used
P05109	Protein S100-A8 OS=Homo sapiens OX=9606 GN=S100A8 PE=1 SV=1	63	93	10.8	7.03	0	1503	1	9	9	138	7.61622e+08	10	0.0391267
	Master Protein Accessions	Master Protein Descriptions	Sequence	# PSMs	# Missed Cleavages	Theo. MH+ [Da]	m/z [Da] (by Search Engine): Mascot	DeltaM [ppm] (by Search Engine): Mascot	Ions Score (by Search Engine): Mascot	Top Apex RT [min]	Modifications	Qvality q-value	# Proteins		# Protein Groups	Abundance: F1764: n/a, Sample, n/a, n/a	Abundances Count: F1764: n/a, Sample, n/a, n/a	Sequence in Protein	Positions in Proteins	Quan Usage	Quan Ratio Usage
	P05109	Protein S100-A8 OS=Homo sapiens OX=9606 GN=S100A8 PE=1 SV=1	LLETECPQYIR	8	0	1421.71	711.359	0.49	30	29.8	1xCarbamidomethyl [C6]	0.00165393	1		1	94653904	1	K.LLETECPQYIR.K	[37-47]	Used	Used
	P05109	Protein S100-A8 OS=Homo sapiens OX=9606 GN=S100A8 PE=1 SV=1	LLETECPQYIRK	7	1	1549.8	775.405	-0.56	57	24.75	1xCarbamidomethyl [C6]	0.00165393	1		1	42849568	2	K.LLETECPQYIRK.K	[37-48]	Used	Used
	P05109	Protein S100-A8 OS=Homo sapiens OX=9606 GN=S100A8 PE=1 SV=1	ALNSIIDVYHK	73	0	1272.69	636.851	0.12	58	34.49		0.00165393	1		1	4.58114e+08	8	K.ALNSIIDVYHK.Y	[8-18]	Used	Used
	P05109	Protein S100-A8 OS=Homo sapiens OX=9606 GN=S100A8 PE=1 SV=1	KLLETECPQYIR	6	1	1549.8	775.407	1.14	79	27.73	1xCarbamidomethyl [C7]	0.00165393	1		1	52444340	2	K.KLLETECPQYIR.K	[36-47]	Used	Used
	P05109	Protein S100-A8 OS=Homo sapiens OX=9606 GN=S100A8 PE=1 SV=1	GNFHAVYRDDLK	26	1	1434.71	717.86	0.78	24	33.48		0.00165393	1		1	1.17548e+07	8	K.GNFHAVYRDDLK.K	[24-35]	Used	Used
	P05109	Protein S100-A8 OS=Homo sapiens OX=9606 GN=S100A8 PE=1 SV=1	GNFHAVYR	8	0	963.48	482.244	0.48	42	19.54		0.0024483	1		1	43795112	1	K.GNFHAVYR.D	[24-31]	Used	Used
	P05109	Protein S100-A8 OS=Homo sapiens OX=9606 GN=S100A8 PE=1 SV=1	MLTELEK	2	0	879.449	440.228	0.42	24	20.42	1xOxidation [M1]	0.00456775	1		1	12280672	1	-.MLTELEK.A	[1-7]	Used	Used
	P05109	Protein S100-A8 OS=Homo sapiens OX=9606 GN=S100A8 PE=1 SV=1	MLTELEK	2	0	863.454	432.231	0.09	22	24.51		0.00456775	1		1	42835744	1	-.MLTELEK.A	[1-7]	Used	Used
	P05109	Protein S100-A8 OS=Homo sapiens OX=9606 GN=S100A8 PE=1 SV=1	KKGADVWFK	5	2	1078.6	539.805	-0.89	19	44.5		0.00456775	1		1	875618	1	R.KKGADVWFK.E	[48-56]	Used	Used
	P05109	Protein S100-A8 OS=Homo sapiens OX=9606 GN=S100A8 PE=1 SV=1	MGVAAHKK	1	1	841.471	421.24	0.81	11	19.25		0.00839836	1		1	2.01779e+06	1	K.MGVAAHKK.S	[78-85]	Used	Used
P69905	Hemoglobin subunit alpha OS=Homo sapiens OX=9606 GN=HBA2 PE=1 SV=2	71	142	15.2	8.68	0	1586	1	7	7	101	5.85697e+08	9	0.0286362
	Master Protein Accessions	Master Protein Descriptions	Sequence	# PSMs	# Missed Cleavages	Theo. MH+ [Da]	m/z [Da] (by Search Engine): Mascot	DeltaM [ppm] (by Search Engine): Mascot	Ions Score (by Search Engine): Mascot	Top Apex RT [min]	Modifications	Qvality q-value	# Proteins		# Protein Groups	Abundance: F1764: n/a, Sample, n/a, n/a	Abundances Count: F1764: n/a, Sample, n/a, n/a	Sequence in Protein	Positions in Proteins	Quan Usage	Quan Ratio Usage
	P69905	Hemoglobin subunit alpha OS=Homo sapiens OX=9606 GN=HBA2 PE=1 SV=2	MFLSFPTTK	2	0	1087.55	544.278	0.12	31	39.09	1xOxidation [M1]	0.00165393	1		1	6.98152e+06	1	R.MFLSFPTTK.T	[33-41]	Used	Used
	P69905	Hemoglobin subunit alpha OS=Homo sapiens OX=9606 GN=HBA2 PE=1 SV=2	VLSPADKTNVK	6	1	1171.67	586.338	-0.2	54	16.93		0.00165393	1		1	182257904	1	M.VLSPADKTNVK.A	[2-12]	Used	Used
	P69905	Hemoglobin subunit alpha OS=Homo sapiens OX=9606 GN=HBA2 PE=1 SV=2	VGAHAGEYGAEALER	53	0	1529.73	765.371	0.14	74	22.91		0.00165393	1		1	2.01099e+08	9	K.VGAHAGEYGAEALER.M	[18-32]	Used	Used
	P69905	Hemoglobin subunit alpha OS=Homo sapiens OX=9606 GN=HBA2 PE=1 SV=2	VADALTNAVAHVDDMPNALSALSDLHAHK	4	0	2996.49	999.505	3.57	33	53.74		0.00165393	1		1	416548	1	K.VADALTNAVAHVDDMPNALSALSDLHAHK.L	[63-91]	Used	Used
	P69905	Hemoglobin subunit alpha OS=Homo sapiens OX=9606 GN=HBA2 PE=1 SV=2	VADALTNAVAHVDDMPNALSALSDLHAHK	1	0	3012.48	1004.83	1.42	27	46.85	1xOxidation [M15]	0.00165393	1		1	444037	1	K.VADALTNAVAHVDDMPNALSALSDLHAHK.L	[63-91]	Used	Used
	P69905	Hemoglobin subunit alpha OS=Homo sapiens OX=9606 GN=HBA2 PE=1 SV=2	TYFPHFDLSHGSAQVK	27	0	1833.89	917.45	-0.01	57	37.04		0.00165393	1		1	9.857e+07	3	K.TYFPHFDLSHGSAQVK.G	[42-57]	Used	Used
	P69905	Hemoglobin subunit alpha OS=Homo sapiens OX=9606 GN=HBA2 PE=1 SV=2	FLASVSTVLTSK	2	0	1252.71	626.861	0.12	45	40.32		0.00165393	1		1	997993	1	K.FLASVSTVLTSK.Y	[129-140]	Used	Used
	P69905	Hemoglobin subunit alpha OS=Homo sapiens OX=9606 GN=HBA2 PE=1 SV=2	MFLSFPTTK	2	0	1071.55	536.28	-1.82	34	43.85		0.0024483	1		1	32932808	1	R.MFLSFPTTK.T	[33-41]	Used	Used
	P69905	Hemoglobin subunit alpha OS=Homo sapiens OX=9606 GN=HBA2 PE=1 SV=2	LRVDPVNFK	4	1	1087.63	544.316	-0.58	34	29.25		0.00411958	1		1	61996864	1	K.LRVDPVNFK.L	[92-100]	Used	Used
P02788	Lactotransferrin OS=Homo sapiens OX=9606 GN=LTF PE=1 SV=6	61	710	78.1	8.12	0	3914	1	49	49	176	3.37651e+08	46	0.0499008
	Master Protein Accessions	Master Protein Descriptions	Sequence	# PSMs	# Missed Cleavages	Theo. MH+ [Da]	m/z [Da] (by Search Engine): Mascot	DeltaM [ppm] (by Search Engine): Mascot	Ions Score (by Search Engine): Mascot	Top Apex RT [min]	Modifications	Qvality q-value	# Proteins		# Protein Groups	Abundance: F1764: n/a, Sample, n/a, n/a	Abundances Count: F1764: n/a, Sample, n/a, n/a	Sequence in Protein	Positions in Proteins	Quan Usage	Quan Ratio Usage
	P02788	Lactotransferrin OS=Homo sapiens OX=9606 GN=LTF PE=1 SV=6	NGSDCPDKFCLFQSETK	4	1	2032.87	1016.94	-1.58	39	35.44	2xCarbamidomethyl [C5; C10]	0.00165393	1		1	1.95094e+06	2	R.NGSDCPDKFCLFQSETK.N	[642-658]	Used	Used
	P02788	Lactotransferrin OS=Homo sapiens OX=9606 GN=LTF PE=1 SV=6	NLLFNDNTECLAR	2	0	1579.75	790.38	-0.11	69	39.61	1xCarbamidomethyl [C10]	0.00165393	1		1	7.82264e+06	1	K.NLLFNDNTECLAR.L	[659-671]	Used	Used
	P02788	Lactotransferrin OS=Homo sapiens OX=9606 GN=LTF PE=1 SV=6	SDTSLTWNSVK	2	0	1237.61	619.306	-0.31	39	30.34		0.00165393	1		1	1.03306e+06	1	R.SDTSLTWNSVK.G	[463-473]	Used	Used
	P02788	Lactotransferrin OS=Homo sapiens OX=9606 GN=LTF PE=1 SV=6	SCHLAMAPNHAVVSR	27	0	1649.8	550.605	1.17	43	22.23	1xCarbamidomethyl [C2]	0.00165393	1		1	3.1728e+07	11	R.SCHLAMAPNHAVVSR.M	[607-621]	Used	Used
	P02788	Lactotransferrin OS=Homo sapiens OX=9606 GN=LTF PE=1 SV=6	RDSPIQCIQAIAENR	1	1	1770.89	590.968	-1.08	41	42.48	1xCarbamidomethyl [C7]	0.00165393	1		1	367090	1	K.RDSPIQCIQAIAENR.A	[58-72]	Used	Used
	P02788	Lactotransferrin OS=Homo sapiens OX=9606 GN=LTF PE=1 SV=6	RSDTSLTWNSVK	2	1	1393.71	697.358	0.54	39	26.99		0.00165393	1		1	2854784	1	R.RSDTSLTWNSVK.G	[462-473]	Used	Used
	P02788	Lactotransferrin OS=Homo sapiens OX=9606 GN=LTF PE=1 SV=6	RSVQWCAVSQPEATK	4	1	1746.86	873.933	0.03	54	24.61	1xCarbamidomethyl [C6]	0.00165393	1		1	4.91124e+06	2	R.RSVQWCAVSQPEATK.C	[23-37]	Used	Used
	P02788	Lactotransferrin OS=Homo sapiens OX=9606 GN=LTF PE=1 SV=6	LKQVLLHQQAK	20	1	1305.8	653.403	-0.82	60	22.25		0.00165393	1		1	2.73276e+07	9	R.LKQVLLHQQAK.F	[628-638]	Used	Used
	P02788	Lactotransferrin OS=Homo sapiens OX=9606 GN=LTF PE=1 SV=6	LRPVAAEVYGTER	6	0	1460.79	730.896	-0.07	49	24.51		0.00165393	1		1	1.26013e+07	2	K.LRPVAAEVYGTER.Q	[93-105]	Used	Used
	P02788	Lactotransferrin OS=Homo sapiens OX=9606 GN=LTF PE=1 SV=6	VPSHAVVAR	7	0	935.542	468.275	-0.2	42	16.04		0.00165393	1		1	82623136	1	R.VPSHAVVAR.S	[269-277]	Used	Used
	P02788	Lactotransferrin OS=Homo sapiens OX=9606 GN=LTF PE=1 SV=6	VRGPPVSCIKR	6	2	1268.73	423.58	-0.32	29	24.13	1xCarbamidomethyl [C8]	0.00165393	1		1	5.11249e+06	3	K.VRGPPVSCIKR.D	[48-58]	Used	Used
	P02788	Lactotransferrin OS=Homo sapiens OX=9606 GN=LTF PE=1 SV=6	YLGPQYVAGITNLK	1	0	1536.84	768.925	1.04	48	42.59		0.00165393	1		1	498376	1	K.YLGPQYVAGITNLK.K	[681-694]	Used	Used
	P02788	Lactotransferrin OS=Homo sapiens OX=9606 GN=LTF PE=1 SV=6	YLGPQYVAGITNLKK	4	1	1664.94	832.972	0.04	47	37.37		0.00165393	1		1	16811410	2	K.YLGPQYVAGITNLKK.C	[681-695]	Used	Used
	P02788	Lactotransferrin OS=Homo sapiens OX=9606 GN=LTF PE=1 SV=6	VVWCAVGEQELRK	2	1	1573.82	787.411	0.07	58	32.05	1xCarbamidomethyl [C4]	0.00165393	1		1	1.51807e+06	1	R.VVWCAVGEQELRK.C	[364-376]	Used	Used
	P02788	Lactotransferrin OS=Homo sapiens OX=9606 GN=LTF PE=1 SV=6	SVNGKEDAIWNLLR	1	1	1614.86	807.934	0	51	48.98		0.00165393	1		1	1.39091e+06	1	R.SVNGKEDAIWNLLR.Q	[278-291]	Used	Used
	P02788	Lactotransferrin OS=Homo sapiens OX=9606 GN=LTF PE=1 SV=6	SVQWCAVSQPEATK	2	0	1590.76	795.883	0.25	68	28.09	1xCarbamidomethyl [C5]	0.00165393	1		1	7416024	1	R.SVQWCAVSQPEATK.C	[24-37]	Used	Used
	P02788	Lactotransferrin OS=Homo sapiens OX=9606 GN=LTF PE=1 SV=6	SNLCALCIGDEQGENK	2	0	1807.79	904.401	0.37	79	31.31	2xCarbamidomethyl [C4; C7]	0.00165393	1		1	2.26597e+06	1	R.SNLCALCIGDEQGENK.C	[520-535]	Used	Used
	P02788	Lactotransferrin OS=Homo sapiens OX=9606 GN=LTF PE=1 SV=6	SNLCALCIGDEQGENKCVPNSNER	2	1	2764.21	922.074	0.13	50	29.95	3xCarbamidomethyl [C4; C7; C17]	0.00165393	1		1	6043481	1	R.SNLCALCIGDEQGENKCVPNSNER.Y	[520-543]	Used	Used
	P02788	Lactotransferrin OS=Homo sapiens OX=9606 GN=LTF PE=1 SV=6	SQQSSDPDPNCVDRPVEGYLAVAVVR	2	0	2858.37	953.463	0.01	42	42.01	1xCarbamidomethyl [C11]	0.00165393	1		1	2440697	1	K.SQQSSDPDPNCVDRPVEGYLAVAVVR.R	[436-461]	Used	Used
	P02788	Lactotransferrin OS=Homo sapiens OX=9606 GN=LTF PE=1 SV=6	FFSASCVPGADK	2	0	1285.59	643.298	0.07	42	29.19	1xCarbamidomethyl [C6]	0.00165393	1		1	949905	1	R.FFSASCVPGADK.G	[171-182]	Used	Used
	P02788	Lactotransferrin OS=Homo sapiens OX=9606 GN=LTF PE=1 SV=6	FFSASCVPGADKGQFPNLCR	4	1	2258.05	1129.53	0.34	55	39.09	2xCarbamidomethyl [C6; C19]	0.00165393	1		1	7.19764e+06	2	R.FFSASCVPGADKGQFPNLCR.L	[171-190]	Used	Used
	P02788	Lactotransferrin OS=Homo sapiens OX=9606 GN=LTF PE=1 SV=6	FQLFGSPSGQK	2	0	1195.61	598.309	0.39	45	37.81		0.00165393	1		1	6.58441e+06	1	K.FQLFGSPSGQK.D	[305-315]	Used	Used
	P02788	Lactotransferrin OS=Homo sapiens OX=9606 GN=LTF PE=1 SV=6	FQLFGSPSGQKDLLFK	4	1	1811.97	906.488	0.16	68	49.08		0.00165393	1		1	1.33218e+06	2	K.FQLFGSPSGQKDLLFK.D	[305-320]	Used	Used
	P02788	Lactotransferrin OS=Homo sapiens OX=9606 GN=LTF PE=1 SV=6	ESTVFEDLSDEAERDEYELLCPDNTR	2	1	3132.36	1044.79	0.19	61	57.78	1xCarbamidomethyl [C21]	0.00165393	1		1	1.83506e+06	1	R.ESTVFEDLSDEAERDEYELLCPDNTR.K	[230-255]	Used	Used
	P02788	Lactotransferrin OS=Homo sapiens OX=9606 GN=LTF PE=1 SV=6	FDEYFSQSCAPGSDPR	2	0	1862.77	931.887	0.44	66	29.93	1xCarbamidomethyl [C9]	0.00165393	1		1	675250	1	K.FDEYFSQSCAPGSDPR.S	[504-519]	Used	Used
	P02788	Lactotransferrin OS=Homo sapiens OX=9606 GN=LTF PE=1 SV=6	GGSFQLNELQGLK	2	0	1390.73	695.87	0.49	38	41.14		0.00165393	1		1	1.79557e+06	1	K.GGSFQLNELQGLK.S	[120-132]	Used	Used
	P02788	Lactotransferrin OS=Homo sapiens OX=9606 GN=LTF PE=1 SV=6	CLAENAGDVAFVK	2	0	1393.68	697.343	0	83	32.16	1xCarbamidomethyl [C1]	0.00165393	1		1	904483	1	R.CLAENAGDVAFVK.D	[553-565]	Used	Used
	P02788	Lactotransferrin OS=Homo sapiens OX=9606 GN=LTF PE=1 SV=6	DLLFKDSAIGFSR	4	1	1468.78	734.893	0.16	60	43.18		0.00165393	1		1	4.12366e+06	2	K.DLLFKDSAIGFSR.V	[316-328]	Used	Used
	P02788	Lactotransferrin OS=Homo sapiens OX=9606 GN=LTF PE=1 SV=6	CGLVPVLAENYK	2	0	1362.71	681.858	0.58	51	40.49	1xCarbamidomethyl [C1]	0.00165393	1		1	2.1994e+06	1	K.CGLVPVLAENYK.S	[424-435]	Used	Used
	P02788	Lactotransferrin OS=Homo sapiens OX=9606 GN=LTF PE=1 SV=6	CSTSPLLEACEFLRK	2	1	1810.88	905.944	-0.9	50	47.67	2xCarbamidomethyl [C1; C10]	0.00165393	1		1			K.CSTSPLLEACEFLRK.-	[696-710]	Not Used	Not Used
	P02788	Lactotransferrin OS=Homo sapiens OX=9606 GN=LTF PE=1 SV=6	CSTSPLLEACEFLR	1	0	1682.79	841.897	-0.45	43	51.94	2xCarbamidomethyl [C1; C10]	0.00165393	1		1	333554	1	K.CSTSPLLEACEFLR.K	[696-709]	Used	Used
	P02788	Lactotransferrin OS=Homo sapiens OX=9606 GN=LTF PE=1 SV=6	DGAGDVAFIR	2	0	1020.51	510.759	-0.21	68	30.77		0.00165393	1		1	6969963	1	R.DGAGDVAFIR.E	[220-229]	Used	Used
	P02788	Lactotransferrin OS=Homo sapiens OX=9606 GN=LTF PE=1 SV=6	EDAIWNLLR	1	0	1129.6	565.304	0.56	62	53.19		0.00165393	1		1	413982	1	K.EDAIWNLLR.Q	[283-291]	Used	Used
	P02788	Lactotransferrin OS=Homo sapiens OX=9606 GN=LTF PE=1 SV=6	CAFSSQEPYFSYSGAFK	2	0	1975.85	988.429	-1.23	82	43.89	1xCarbamidomethyl [C1]	0.00165393	1		1	744312	1	K.CAFSSQEPYFSYSGAFK.C	[200-216]	Used	Used
	P02788	Lactotransferrin OS=Homo sapiens OX=9606 GN=LTF PE=1 SV=6	DSPIQCIQAIAENR	4	0	1614.79	807.899	0.19	63	49.04	1xCarbamidomethyl [C6]	0.00165393	1		1	2.85815e+06	1	R.DSPIQCIQAIAENR.A	[59-72]	Used	Used
	P02788	Lactotransferrin OS=Homo sapiens OX=9606 GN=LTF PE=1 SV=6	KCSTSPLLEACEFLR	2	1	1810.88	905.945	0.31	44	47.67	2xCarbamidomethyl [C2; C11]	0.00165393	1		1			K.KCSTSPLLEACEFLR.K	[695-709]	Not Used	Not Used
	P02788	Lactotransferrin OS=Homo sapiens OX=9606 GN=LTF PE=1 SV=6	KCSTSPLLEACEFLRK	4	2	1938.98	646.997	-0.87	38	43.91	2xCarbamidomethyl [C2; C11]	0.00165393	1		1	1909122	1	K.KCSTSPLLEACEFLRK.-	[695-710]	Used	Used
	P02788	Lactotransferrin OS=Homo sapiens OX=9606 GN=LTF PE=1 SV=6	LADFALLCLDGKR	4	1	1491.8	746.403	0.31	50	45.72	1xCarbamidomethyl [C8]	0.00165393	1		1	1.92244e+06	2	K.LADFALLCLDGKR.K	[587-599]	Used	Used
	P02788	Lactotransferrin OS=Homo sapiens OX=9606 GN=LTF PE=1 SV=6	KGGSFQLNELQGLK	4	1	1518.83	506.947	0.32	43	37.34		0.00165393	1		1	13646664	2	K.KGGSFQLNELQGLK.S	[119-132]	Used	Used
	P02788	Lactotransferrin OS=Homo sapiens OX=9606 GN=LTF PE=1 SV=6	LADFALLCLDGK	4	0	1335.7	668.353	0.07	83	50.35	1xCarbamidomethyl [C8]	0.00165393	1		1	5237177	1	K.LADFALLCLDGK.R	[587-598]	Used	Used
	P02788	Lactotransferrin OS=Homo sapiens OX=9606 GN=LTF PE=1 SV=6	LCAGTGENKCAFSSQEPYFSYSGAFK	2	1	2906.28	969.43	0.06	56	41.42	2xCarbamidomethyl [C2; C10]	0.00165393	1		1	1.03677e+06	1	R.LCAGTGENKCAFSSQEPYFSYSGAFK.C	[191-216]	Used	Used
	P02788	Lactotransferrin OS=Homo sapiens OX=9606 GN=LTF PE=1 SV=6	CLRDGAGDVAFIR	4	1	1449.73	483.914	0.45	22	30.92	1xCarbamidomethyl [C1]	0.0024483	1		1	11680913	2	K.CLRDGAGDVAFIR.E	[217-229]	Used	Used
	P02788	Lactotransferrin OS=Homo sapiens OX=9606 GN=LTF PE=1 SV=6	DSAIGFSR	1	0	852.421	426.714	-0.17	32	23.07		0.0024483	1		1	1.18913e+06	1	K.DSAIGFSR.V	[321-328]	Used	Used
	P02788	Lactotransferrin OS=Homo sapiens OX=9606 GN=LTF PE=1 SV=6	GPPVSCIKR	6	1	1013.56	507.282	0.45	32	17.08	1xCarbamidomethyl [C6]	0.0024483	1		1	19404536	1	R.GPPVSCIKR.D	[50-58]	Used	Used
	P02788	Lactotransferrin OS=Homo sapiens OX=9606 GN=LTF PE=1 SV=6	ESTVFEDLSDEAERDEYELLCPDNTRKPVDK	2	2	3699.7	925.679	-0.24	1		1xCarbamidomethyl [C21]	0.0024483	1		1			R.ESTVFEDLSDEAERDEYELLCPDNTRKPVDK.F	[230-260]	Not Used	Not Used
	P02788	Lactotransferrin OS=Homo sapiens OX=9606 GN=LTF PE=1 SV=6	YYGYTGAFR	2	0	1097.51	549.256	0.53	37	30.43		0.00411958	1		1	10368006	1	R.YYGYTGAFR.C	[544-552]	Used	Used
	P02788	Lactotransferrin OS=Homo sapiens OX=9606 GN=LTF PE=1 SV=6	LRPVAAEVYGTERQPR	3	1	1842	614.67	-1.12	4	27.24		0.00456775	1		1	1.99155e+06	2	K.LRPVAAEVYGTERQPR.T	[93-108]	Used	Used
	P02788	Lactotransferrin OS=Homo sapiens OX=9606 GN=LTF PE=1 SV=6	QVLLHQQAK	2	0	1064.62	532.814	0.35	16	17.12		0.00456775	1		1	9040885	1	K.QVLLHQQAK.F	[630-638]	Used	Used
	P02788	Lactotransferrin OS=Homo sapiens OX=9606 GN=LTF PE=1 SV=6	VRGPPVSCIK	1	1	1112.62	556.816	1.01	15	19.8	1xCarbamidomethyl [C8]	0.00535372	1		1	4589081	1	K.VRGPPVSCIK.R	[48-57]	Used	Used
P05164	Myeloperoxidase OS=Homo sapiens OX=9606 GN=MPO PE=1 SV=1	45	745	83.8	8.97	0	1982	1	29	33	115	1.94355e+08	27	0.0326056
	Master Protein Accessions	Master Protein Descriptions	Sequence	# PSMs	# Missed Cleavages	Theo. MH+ [Da]	m/z [Da] (by Search Engine): Mascot	DeltaM [ppm] (by Search Engine): Mascot	Ions Score (by Search Engine): Mascot	Top Apex RT [min]	Modifications	Qvality q-value	# Proteins		# Protein Groups	Abundance: F1764: n/a, Sample, n/a, n/a	Abundances Count: F1764: n/a, Sample, n/a, n/a	Sequence in Protein	Positions in Proteins	Quan Usage	Quan Ratio Usage
	P05164	Myeloperoxidase OS=Homo sapiens OX=9606 GN=MPO PE=1 SV=1	NQINALTSFVDASMVYGSEEPLAR	4	0	2612.27	1306.64	-1.05	121			0.00165393	1		1			R.NQINALTSFVDASMVYGSEEPLAR.N	[328-351]	Not Used	Not Used
	P05164	Myeloperoxidase OS=Homo sapiens OX=9606 GN=MPO PE=1 SV=1	QALAQISLPR	4	0	1096.65	548.828	0.59	54	35.13		0.00165393	1		1	9802266	1	R.QALAQISLPR.I	[692-701]	Used	Used
	P05164	Myeloperoxidase OS=Homo sapiens OX=9606 GN=MPO PE=1 SV=1	NQADCIPFFR	2	0	1267.59	634.298	0.05	56	43.04	1xCarbamidomethyl [C5]	0.00165393	1		1	6.31847e+06	1	K.NQADCIPFFR.S	[305-314]	Used	Used
	P05164	Myeloperoxidase OS=Homo sapiens OX=9606 GN=MPO PE=1 SV=1	NNIFMSNSYPR	1	0	1342.62	671.814	0.06	28	33.78		0.00165393	1		1	258469	1	K.NNIFMSNSYPR.D	[715-725]	Used	Used
	P05164	Myeloperoxidase OS=Homo sapiens OX=9606 GN=MPO PE=1 SV=1	QNQIAVDEIR	2	0	1185.62	593.315	-0.12	45	26.02		0.00165393	1		1	1.40935e+06	1	R.QNQIAVDEIR.E	[560-569]	Used	Used
	P05164	Myeloperoxidase OS=Homo sapiens OX=9606 GN=MPO PE=1 SV=1	QNQIAVDEIRER	6	1	1470.77	735.887	0.24	33	23.63		0.00165393	1		1	1.79041e+07	2	R.QNQIAVDEIRER.L	[560-571]	Used	Used
	P05164	Myeloperoxidase OS=Homo sapiens OX=9606 GN=MPO PE=1 SV=1	RFCGLPQPETVGQLGTVLR	4	1	2128.13	710.05	0.54	40	44.68	1xCarbamidomethyl [C3]	0.00165393	1		1	1.84636e+06	2	R.RFCGLPQPETVGQLGTVLR.N	[604-622]	Used	Used
	P05164	Myeloperoxidase OS=Homo sapiens OX=9606 GN=MPO PE=1 SV=1	RSPTLGASNR	4	1	1058.57	529.789	0.02	55	16.13		0.00165393	1		1	54678000	1	R.RSPTLGASNR.A	[184-193]	Used	Used
	P05164	Myeloperoxidase OS=Homo sapiens OX=9606 GN=MPO PE=1 SV=1	IKNQADCIPFFR	8	1	1508.77	754.887	-0.12	44	39.82	1xCarbamidomethyl [C7]	0.00165393	1		1	38450776	2	R.IKNQADCIPFFR.S	[303-314]	Used	Used
	P05164	Myeloperoxidase OS=Homo sapiens OX=9606 GN=MPO PE=1 SV=1	IICDNTGITTVSK	2	0	1421.73	711.369	0.71	84	24.07	1xCarbamidomethyl [C3]	0.00165393	1		1	7254613	1	R.IICDNTGITTVSK.N	[702-714]	Used	Used
	P05164	Myeloperoxidase OS=Homo sapiens OX=9606 GN=MPO PE=1 SV=1	IICDNTGITTVSKNNIFMSNSYPR	1	1	2761.33	921.115	0.69	23	37.87	1xCarbamidomethyl [C3]; 1xOxidation [M18]	0.00165393	1		1	402060	1	R.IICDNTGITTVSKNNIFMSNSYPR.D	[702-725]	Used	Used
	P05164	Myeloperoxidase OS=Homo sapiens OX=9606 GN=MPO PE=1 SV=1	LFEQVMR	2	0	938.476	469.742	0.24	42	23.53	1xOxidation [M6]	0.00165393	1		1	5828748	1	R.LFEQVMR.I	[572-578]	Used	Used
	P05164	Myeloperoxidase OS=Homo sapiens OX=9606 GN=MPO PE=1 SV=1	IGLDLPALNMQR	3	0	1340.74	670.871	-0.14	30	48.46		0.00165393	1		1	3.95402e+06	1	R.IGLDLPALNMQR.S	[579-590]	Used	Used
	P05164	Myeloperoxidase OS=Homo sapiens OX=9606 GN=MPO PE=1 SV=1	LMEQYGTPNNIDIWMGGVSEPLKR	1	1	2748.35	916.787	-0.23	29			0.00165393	1		1			K.LMEQYGTPNNIDIWMGGVSEPLKR.K	[630-653]	Not Used	Not Used
	P05164; P11678	Myeloperoxidase OS=Homo sapiens OX=9606 GN=MPO PE=1 SV=1 Eosinophil peroxidase OS=Homo sapiens OX=9606 GN=EPX PE=1 SV=2	IPCFLAGDTR	4	0	1149.57	575.29	0.27	48	35.61	1xCarbamidomethyl [C3]	0.00165393	2		2	12383892	1	R.IPCFLAGDTR.S	[396-405]	Not Used	Not Used
	P05164	Myeloperoxidase OS=Homo sapiens OX=9606 GN=MPO PE=1 SV=1	VGPLLACIIGTQFR	2	0	1544.86	772.934	-0.78	74		1xCarbamidomethyl [C7]	0.00165393	1		1			R.VGPLLACIIGTQFR.K	[657-670]	Not Used	Not Used
	P05164	Myeloperoxidase OS=Homo sapiens OX=9606 GN=MPO PE=1 SV=1	YGHTLIQPFMFR	3	0	1509.77	755.387	0.2	31	46.85		0.00165393	1		1	5.89924e+06	2	R.YGHTLIQPFMFR.L	[500-511]	Used	Used
	P05164	Myeloperoxidase OS=Homo sapiens OX=9606 GN=MPO PE=1 SV=1	YGHTLIQPFMFR	2	0	1525.76	763.385	0.22	20	42.72	1xOxidation [M10]	0.00165393	1		1	559228	1	R.YGHTLIQPFMFR.L	[500-511]	Used	Used
	P05164	Myeloperoxidase OS=Homo sapiens OX=9606 GN=MPO PE=1 SV=1	WLPAEYEDGFSLPYGWTPGVKR	1	1	2568.26	856.756	-0.91	30	53.51		0.00165393	1		1	579145	1	R.WLPAEYEDGFSLPYGWTPGVKR.N	[198-219]	Used	Used
	P05164	Myeloperoxidase OS=Homo sapiens OX=9606 GN=MPO PE=1 SV=1	WLPAEYEDGFSLPYGWTPGVK	1	0	2412.15	1206.58	0.8	36			0.00165393	1		1			R.WLPAEYEDGFSLPYGWTPGVK.R	[198-218]	Not Used	Not Used
	P05164	Myeloperoxidase OS=Homo sapiens OX=9606 GN=MPO PE=1 SV=1	VVLEGGIDPILR	2	0	1280.76	640.882	0.15	65	42.36		0.00165393	1		1	2.61519e+06	1	R.VVLEGGIDPILR.G	[537-548]	Used	Used
	P05164; P11678	Myeloperoxidase OS=Homo sapiens OX=9606 GN=MPO PE=1 SV=1 Eosinophil peroxidase OS=Homo sapiens OX=9606 GN=EPX PE=1 SV=2	SRDHGLPGYNAWR	18	1	1528.74	510.252	0.14	19	52.59		0.00165393	2		2	1.63617e+06	3	R.SRDHGLPGYNAWR.R	[591-603]	Not Used	Not Used
	P05164	Myeloperoxidase OS=Homo sapiens OX=9606 GN=MPO PE=1 SV=1	SSEMPELTSMHTLLLR	3	0	1844.92	922.967	1.63	72	47.66		0.00165393	1		1	1.53934e+06	2	R.SSEMPELTSMHTLLLR.E	[406-421]	Used	Used
	P05164	Myeloperoxidase OS=Homo sapiens OX=9606 GN=MPO PE=1 SV=1	SSEMPELTSMHTLLLR	2	0	1860.92	930.964	0.51	18		1xOxidation [M4]	0.00165393	1		1			R.SSEMPELTSMHTLLLR.E	[406-421]	Not Used	Not Used
	P05164	Myeloperoxidase OS=Homo sapiens OX=9606 GN=MPO PE=1 SV=1	FCGLPQPETVGQLGTVLR	2	0	1972.03	986.519	-1.15	51	48.32	1xCarbamidomethyl [C2]	0.00165393	1		1	1.19933e+06	1	R.FCGLPQPETVGQLGTVLR.N	[605-622]	Used	Used
	P05164	Myeloperoxidase OS=Homo sapiens OX=9606 GN=MPO PE=1 SV=1	DGDRFWWENEGVFSMQQR	3	1	2302.99	768.336	-0.05	46	48.4	1xOxidation [M15]	0.00165393	1		1	2.66973e+06	1	R.DGDRFWWENEGVFSMQQR.Q	[674-691]	Used	Used
	P05164; P11678	Myeloperoxidase OS=Homo sapiens OX=9606 GN=MPO PE=1 SV=1 Eosinophil peroxidase OS=Homo sapiens OX=9606 GN=EPX PE=1 SV=2	DHGLPGYNAWR	3	0	1285.61	643.307	-0.06	27	31.41		0.00165393	2		2	6010232	1	R.DHGLPGYNAWR.R	[593-603]	Not Used	Not Used
	P05164	Myeloperoxidase OS=Homo sapiens OX=9606 GN=MPO PE=1 SV=1	AVSNEIVR	1	0	887.495	444.251	-0.01	24	19.46		0.00165393	1		1	2.88899e+06	1	R.AVSNEIVR.F	[229-236]	Used	Used
	P05164	Myeloperoxidase OS=Homo sapiens OX=9606 GN=MPO PE=1 SV=1	AVSNEIVRFPTDQLTPDQER	5	1	2315.16	772.393	0.54	59	38.2		0.00165393	1		1	1.66886e+07	2	R.AVSNEIVRFPTDQLTPDQER.S	[229-248]	Used	Used
	P05164	Myeloperoxidase OS=Homo sapiens OX=9606 GN=MPO PE=1 SV=1	KLMEQYGTPNNIDIWMGGVSEPLK	2	1	2720.34	907.453	0.77	35			0.00165393	1		1			R.KLMEQYGTPNNIDIWMGGVSEPLK.R	[629-652]	Not Used	Not Used
	P05164	Myeloperoxidase OS=Homo sapiens OX=9606 GN=MPO PE=1 SV=1	KLMEQYGTPNNIDIWMGGVSEPLKR	2	2	2892.44	964.817	-0.39	35	44.94	1xOxidation [M3]	0.00165393	1		1	353570	1	R.KLMEQYGTPNNIDIWMGGVSEPLKR.K	[629-653]	Used	Used
	P05164	Myeloperoxidase OS=Homo sapiens OX=9606 GN=MPO PE=1 SV=1	KLMEQYGTPNNIDIWMGGVSEPLKR	2	2	2876.44	959.487	0.93	58	46.66		0.00165393	1		1	815793	2	R.KLMEQYGTPNNIDIWMGGVSEPLKR.K	[629-653]	Used	Used
	P05164	Myeloperoxidase OS=Homo sapiens OX=9606 GN=MPO PE=1 SV=1	LDNRYQPMEPNPR	4	1	1629.78	543.932	0.77	24	21.75		0.00165393	1		1	2.59203e+06	1	R.LDNRYQPMEPNPR.V	[512-524]	Used	Used
	P05164	Myeloperoxidase OS=Homo sapiens OX=9606 GN=MPO PE=1 SV=1	IANVFTNAFR	2	0	1152.62	576.812	0.39	69	43.34		0.00165393	1		1	4385930	1	R.IANVFTNAFR.Y	[490-499]	Used	Used
	P05164	Myeloperoxidase OS=Homo sapiens OX=9606 GN=MPO PE=1 SV=1	IGLDLPALNMQR	2	0	1356.73	678.87	0.97	26	43.32	1xOxidation [M10]	0.0024483	1		1	807036	1	R.IGLDLPALNMQR.S	[579-590]	Used	Used
	P05164; P11678	Myeloperoxidase OS=Homo sapiens OX=9606 GN=MPO PE=1 SV=1 Eosinophil peroxidase OS=Homo sapiens OX=9606 GN=EPX PE=1 SV=2	GLMATPAKLNR	1	1	1171.66	586.335	0.79	26	23.6		0.0024483	2		2	3426687	1	R.GLMATPAKLNR.Q	[549-559]	Not Used	Not Used
	P05164	Myeloperoxidase OS=Homo sapiens OX=9606 GN=MPO PE=1 SV=1	LDNRYQPMEPNPR	3	1	1645.78	549.264	0.87	13	19.15	1xOxidation [M8]	0.00411958	1		1	2.65488e+06	2	R.LDNRYQPMEPNPR.V	[512-524]	Used	Used
	P05164	Myeloperoxidase OS=Homo sapiens OX=9606 GN=MPO PE=1 SV=1	NGFPVALAR	1	0	944.531	472.77	0.6	17	33.81		0.00456775	1		1			R.NGFPVALAR.A	[220-228]	Not Used	Not Used
P35579	Myosin-9 OS=Homo sapiens OX=9606 GN=MYH9 PE=1 SV=4	40	1960	226.4	5.6	0	4104	1	73	73	169	1.27577e+08	62	0.0479161
	Master Protein Accessions	Master Protein Descriptions	Sequence	# PSMs	# Missed Cleavages	Theo. MH+ [Da]	m/z [Da] (by Search Engine): Mascot	DeltaM [ppm] (by Search Engine): Mascot	Ions Score (by Search Engine): Mascot	Top Apex RT [min]	Modifications	Qvality q-value	# Proteins		# Protein Groups	Abundance: F1764: n/a, Sample, n/a, n/a	Abundances Count: F1764: n/a, Sample, n/a, n/a	Sequence in Protein	Positions in Proteins	Quan Usage	Quan Ratio Usage
	P35579	Myosin-9 OS=Homo sapiens OX=9606 GN=MYH9 PE=1 SV=4	QAQQERDELADEIANSSGK	4	1	2088.98	696.998	0.07	61	27.72		0.00165393	1		1	2.25077e+06	1	R.QAQQERDELADEIANSSGK.G	[1698-1716]	Used	Used
	P35579	Myosin-9 OS=Homo sapiens OX=9606 GN=MYH9 PE=1 SV=4	QLAAENRLTEMETLQSQLMAEK	1	1	2534.26	845.423	-1.32	20			0.00165393	1		1			K.QLAAENRLTEMETLQSQLMAEK.L	[861-882]	Not Used	Not Used
	P35579	Myosin-9 OS=Homo sapiens OX=9606 GN=MYH9 PE=1 SV=4	QIATLHAQVADMK	2	0	1425.75	713.38	0.58	52	26.37		0.00165393	1		1	773616	1	K.QIATLHAQVADMK.K	[1358-1370]	Used	Used
	P35579	Myosin-9 OS=Homo sapiens OX=9606 GN=MYH9 PE=1 SV=4	QLEEAEEEAQR	2	0	1331.61	666.308	0.42	64	18.1		0.00165393	1		1	507234	1	R.QLEEAEEEAQR.A	[1878-1888]	Used	Used
	P35579	Myosin-9 OS=Homo sapiens OX=9606 GN=MYH9 PE=1 SV=4	QLLQANPILEAFGNAK	1	0	1726.95	863.978	-0.37	43			0.00165393	3		1			R.QLLQANPILEAFGNAK.T	[210-225]	Not Used	Not Used
	P35579	Myosin-9 OS=Homo sapiens OX=9606 GN=MYH9 PE=1 SV=4	MQQNIQELEEQLEEEESAR	3	0	2333.06	1167.03	-1.15	96			0.00165393	1		1			K.MQQNIQELEEQLEEEESAR.Q	[941-959]	Not Used	Not Used
	P35579	Myosin-9 OS=Homo sapiens OX=9606 GN=MYH9 PE=1 SV=4	MQQNIQELEEQLEEEESARQK	1	1	2589.21	863.74	-1.51	28	41.88		0.00165393	1		1	163139	1	K.MQQNIQELEEQLEEEESARQK.L	[941-961]	Used	Used
	P35579	Myosin-9 OS=Homo sapiens OX=9606 GN=MYH9 PE=1 SV=4	NAEQYKDQADK	2	1	1309.6	655.304	-0.64	56	15.23		0.00165393	1		1	591705	1	R.NAEQYKDQADK.A	[1857-1867]	Used	Used
	P35579	Myosin-9 OS=Homo sapiens OX=9606 GN=MYH9 PE=1 SV=4	SGFEPASLKEEVGEEAIVELVENGKK	2	2	2788.43	930.149	3.03	12			0.00165393	1		1			K.SGFEPASLKEEVGEEAIVELVENGKK.V	[39-64]	Not Used	Not Used
	P35579	Myosin-9 OS=Homo sapiens OX=9606 GN=MYH9 PE=1 SV=4	QTLENERGELANEVK	2	1	1729.87	865.439	0.06	39	25.27		0.00165393	1		1	527549	1	K.QTLENERGELANEVK.V	[1220-1234]	Used	Used
	P35579	Myosin-9 OS=Homo sapiens OX=9606 GN=MYH9 PE=1 SV=4	LKSMEAEMIQLQEELAAAER	1	1	2290.14	764.052	0.23	36			0.00165393	1		1			K.LKSMEAEMIQLQEELAAAER.A	[1675-1694]	Not Used	Not Used
	P35579	Myosin-9 OS=Homo sapiens OX=9606 GN=MYH9 PE=1 SV=4	LLEDRIAEFTTNLTEEEEKSK	2	2	2495.25	832.422	0.37	37	46.92		0.00165393	1		1	414506	1	K.LLEDRIAEFTTNLTEEEEKSK.S	[996-1016]	Used	Used
	P35579	Myosin-9 OS=Homo sapiens OX=9606 GN=MYH9 PE=1 SV=4	IMGIPEEEQMGLLR	2	0	1615.82	808.413	0.37	37	46.11		0.00165393	1		1	334892	1	R.IMGIPEEEQMGLLR.V	[328-341]	Used	Used
	P35579	Myosin-9 OS=Homo sapiens OX=9606 GN=MYH9 PE=1 SV=4	LTKDFSALESQLQDTQELLQEENR	2	1	2835.4	945.805	-0.41	51	51.62		0.00165393	1		1	305140	1	K.LTKDFSALESQLQDTQELLQEENR.Q	[1299-1322]	Used	Used
	P35579	Myosin-9 OS=Homo sapiens OX=9606 GN=MYH9 PE=1 SV=4	LTKDFSALESQLQDTQELLQEENRQK	3	2	3091.55	1031.19	-0.39	67	49.33		0.00165393	1		1	333482	1	K.LTKDFSALESQLQDTQELLQEENRQK.L	[1299-1324]	Used	Used
	P35579	Myosin-9 OS=Homo sapiens OX=9606 GN=MYH9 PE=1 SV=4	MEDSVGCLETAEEVKR	1	1	1852.84	926.923	-1.36	78	27.93	1xCarbamidomethyl [C7]	0.00165393	1		1	239395	1	K.MEDSVGCLETAEEVKR.K	[1373-1388]	Used	Used
	P35579	Myosin-9 OS=Homo sapiens OX=9606 GN=MYH9 PE=1 SV=4	LQQELDDLLVDLDHQR	4	0	1949.99	975.5	0.07	87	52.32		0.00165393	1		1	2.46033e+06	2	R.LQQELDDLLVDLDHQR.Q	[1418-1433]	Used	Used
	P35579	Myosin-9 OS=Homo sapiens OX=9606 GN=MYH9 PE=1 SV=4	LQVELDNVTGLLSQSDSK	2	0	1946.01	973.507	0.01	93	48.49		0.00165393	1		1	397529	1	K.LQVELDNVTGLLSQSDSK.S	[1278-1295]	Used	Used
	P35579	Myosin-9 OS=Homo sapiens OX=9606 GN=MYH9 PE=1 SV=4	IRELESQISELQEDLESER	4	1	2303.14	768.383	-0.95	39	48.43		0.00165393	1		1	2.60123e+06	2	K.IRELESQISELQEDLESER.A	[1106-1124]	Used	Used
	P35579	Myosin-9 OS=Homo sapiens OX=9606 GN=MYH9 PE=1 SV=4	IRELESQISELQEDLESERASR	2	2	2617.31	873.107	-0.3	27	45.5		0.00165393	1		1	281062	1	K.IRELESQISELQEDLESERASR.N	[1106-1127]	Used	Used
	P35579	Myosin-9 OS=Homo sapiens OX=9606 GN=MYH9 PE=1 SV=4	VMQEQGTHPK	2	0	1154.56	577.785	0.04	48	15.09		0.00165393	1		1	3.28088e+06	1	K.VMQEQGTHPK.F	[546-555]	Used	Used
	P35579	Myosin-9 OS=Homo sapiens OX=9606 GN=MYH9 PE=1 SV=4	VKLQEMEGTVK	2	1	1261.68	631.345	-0.19	47	23.55		0.00165393	1		1	4.93628e+06	1	K.VKLQEMEGTVK.S	[1792-1802]	Used	Used
	P35579	Myosin-9 OS=Homo sapiens OX=9606 GN=MYH9 PE=1 SV=4	VDYKADEWLMK	2	1	1397.68	699.342	0.33	21	36.31		0.00165393	2		1	2062921	1	K.VDYKADEWLMK.N	[577-587]	Used	Used
	P35579	Myosin-9 OS=Homo sapiens OX=9606 GN=MYH9 PE=1 SV=4	YKASITALEAK	2	1	1194.67	597.84	-0.08	41	25.47		0.00165393	1		1	3.41491e+06	1	K.YKASITALEAK.I	[1805-1815]	Used	Used
	P35579	Myosin-9 OS=Homo sapiens OX=9606 GN=MYH9 PE=1 SV=4	TEMEDLMSSKDDVGK	3	1	1684.74	842.874	-0.02	53	29.58		0.00165393	1		1	3.20216e+06	2	R.TEMEDLMSSKDDVGK.S	[1504-1518]	Used	Used
	P35579	Myosin-9 OS=Homo sapiens OX=9606 GN=MYH9 PE=1 SV=4	SMEAEMIQLQEELAAAER	2	0	2048.96	1024.98	-0.32	72			0.00165393	1		1			K.SMEAEMIQLQEELAAAER.A	[1677-1694]	Not Used	Not Used
	P35579	Myosin-9 OS=Homo sapiens OX=9606 GN=MYH9 PE=1 SV=4	TVGQLYKEQLAK	2	1	1377.77	689.39	0.01	54	24.4		0.00165393	1		1	1.52099e+06	1	R.TVGQLYKEQLAK.L	[645-656]	Used	Used
	P35579	Myosin-9 OS=Homo sapiens OX=9606 GN=MYH9 PE=1 SV=4	TRLQQELDDLLVDLDHQR	1	1	2207.14	736.386	0.85	28			0.00165393	1		1			K.TRLQQELDDLLVDLDHQR.Q	[1416-1433]	Not Used	Not Used
	P35579	Myosin-9 OS=Homo sapiens OX=9606 GN=MYH9 PE=1 SV=4	THEAQIQEMR	3	0	1242.59	621.798	0.14	34	18.24		0.00165393	1		1	1.15407e+06	1	K.THEAQIQEMR.Q	[1182-1191]	Used	Used
	P35579	Myosin-9 OS=Homo sapiens OX=9606 GN=MYH9 PE=1 SV=4	TLEEEAKTHEAQIQEMR	1	1	2058.98	686.997	0.4	18	24.6	1xOxidation [M16]	0.00165393	1		1	540169	1	K.TLEEEAKTHEAQIQEMR.Q	[1175-1191]	Used	Used
	P35579	Myosin-9 OS=Homo sapiens OX=9606 GN=MYH9 PE=1 SV=4	TLEEEAKTHEAQIQEMR	6	1	2042.98	1021.99	-0.89	77	29.74		0.00165393	1		1	1.13605e+07	2	K.TLEEEAKTHEAQIQEMR.Q	[1175-1191]	Used	Used
	P35579	Myosin-9 OS=Homo sapiens OX=9606 GN=MYH9 PE=1 SV=4	ANLQIDQINTDLNLER	2	0	1869.97	935.487	-0.26	89	42.95		0.00165393	1		1	784176	1	K.ANLQIDQINTDLNLER.S	[1755-1770]	Used	Used
	P35579	Myosin-9 OS=Homo sapiens OX=9606 GN=MYH9 PE=1 SV=4	EMEAELEDERK	2	1	1378.62	689.812	0.22	59	20.11		0.00165393	1		1	1.55839e+06	1	R.EMEAELEDERK.Q	[1593-1603]	Used	Used
	P35579	Myosin-9 OS=Homo sapiens OX=9606 GN=MYH9 PE=1 SV=4	ALEEAMEQKAELER	4	1	1646.81	823.906	-0.72	79	27.72		0.00165393	1		1	3.26198e+06	1	R.ALEEAMEQKAELER.L	[1484-1497]	Used	Used
	P35579	Myosin-9 OS=Homo sapiens OX=9606 GN=MYH9 PE=1 SV=4	ALEQQVEEMKTQLEELEDELQATEDAK	2	1	3147.49	1049.83	0.07	46			0.00165393	1		1			R.ALEQQVEEMKTQLEELEDELQATEDAK.L	[1529-1555]	Not Used	Not Used
	P35579	Myosin-9 OS=Homo sapiens OX=9606 GN=MYH9 PE=1 SV=4	GALALEEKR	2	1	986.563	493.785	-0.59	45	19.74		0.00165393	1		1	5.94446e+06	1	K.GALALEEKR.R	[1717-1725]	Used	Used
	P35579	Myosin-9 OS=Homo sapiens OX=9606 GN=MYH9 PE=1 SV=4	DLGEELEALKTELEDTLDSTAAQQELR	2	1	3017.48	1006.5	0.24	34			0.00165393	1		1			R.DLGEELEALKTELEDTLDSTAAQQELR.S	[1136-1162]	Not Used	Not Used
	P35579	Myosin-9 OS=Homo sapiens OX=9606 GN=MYH9 PE=1 SV=4	DFSALESQLQDTQELLQEENR	2	0	2493.17	1247.09	-0.34	43			0.00165393	1		1			K.DFSALESQLQDTQELLQEENR.Q	[1302-1322]	Not Used	Not Used
	P35579	Myosin-9 OS=Homo sapiens OX=9606 GN=MYH9 PE=1 SV=4	DFSALESQLQDTQELLQEENRQK	3	1	2749.33	1375.17	0.82	78	52.41		0.00165393	1		1	1.38578e+06	1	K.DFSALESQLQDTQELLQEENRQK.L	[1302-1324]	Used	Used
	P35579	Myosin-9 OS=Homo sapiens OX=9606 GN=MYH9 PE=1 SV=4	KANLQIDQINTDLNLER	4	1	1998.06	999.534	-0.37	83	39.08		0.00165393	1		1	3.00388e+06	2	K.KANLQIDQINTDLNLER.S	[1754-1770]	Used	Used
	P35579	Myosin-9 OS=Homo sapiens OX=9606 GN=MYH9 PE=1 SV=4	KVEAQLQELQVK	2	1	1412.81	706.909	0.14	77	27.71		0.00165393	1		1	1.31363e+06	1	K.KVEAQLQELQVK.F	[1249-1260]	Used	Used
	P35579	Myosin-9 OS=Homo sapiens OX=9606 GN=MYH9 PE=1 SV=4	HSQAVEELAEQLEQTKR	5	1	1996.01	666.008	-0.02	46	37.23		0.00165393	1		1	4.59059e+06	1	K.HSQAVEELAEQLEQTKR.V	[1194-1210]	Used	Used
	P35579	Myosin-9 OS=Homo sapiens OX=9606 GN=MYH9 PE=1 SV=4	IAEFTTNLTEEEEKSK	4	1	1868.91	934.96	-0.02	98	30.22		0.00165393	1		1	5.84069e+06	2	R.IAEFTTNLTEEEEKSK.S	[1001-1016]	Used	Used
	P35579	Myosin-9 OS=Homo sapiens OX=9606 GN=MYH9 PE=1 SV=4	KEEELQAALAR	2	1	1257.68	629.343	-0.17	61	24.58		0.00165393	3		1	2.15793e+06	1	K.KEEELQAALAR.V	[1081-1091]	Used	Used
	P35579	Myosin-9 OS=Homo sapiens OX=9606 GN=MYH9 PE=1 SV=4	KMQQNIQELEEQLEEEESARQK	1	2	2717.3	906.44	0.58	45	40.51		0.00165393	1		1	313213	1	K.KMQQNIQELEEQLEEEESARQK.L	[940-961]	Used	Used
	P35579	Myosin-9 OS=Homo sapiens OX=9606 GN=MYH9 PE=1 SV=4	KMQQNIQELEEQLEEEESAR	2	1	2477.15	826.386	-0.6	56	40.04	1xOxidation [M2]	0.00165393	1		1	198050	1	K.KMQQNIQELEEQLEEEESAR.Q	[940-959]	Used	Used
	P35579	Myosin-9 OS=Homo sapiens OX=9606 GN=MYH9 PE=1 SV=4	KMQQNIQELEEQLEEEESAR	1	1	2461.15	1231.08	-0.2	89	43.69		0.00165393	1		1	176182	1	K.KMQQNIQELEEQLEEEESAR.Q	[940-959]	Used	Used
	P35579	Myosin-9 OS=Homo sapiens OX=9606 GN=MYH9 PE=1 SV=4	KMEDSVGCLETAEEVKR	3	2	1980.94	660.984	-0.18	48	26.2	1xCarbamidomethyl [C8]	0.00165393	1		1	3381789	1	K.KMEDSVGCLETAEEVKR.K	[1372-1388]	Used	Used
	P35579	Myosin-9 OS=Homo sapiens OX=9606 GN=MYH9 PE=1 SV=4	KLEEEQIILEDQNCK	4	1	1888.93	944.97	0.05	109	29.3	1xCarbamidomethyl [C14]	0.00165393	1		1	2.74126e+06	2	K.KLEEEQIILEDQNCK.L	[975-989]	Used	Used
	P35579	Myosin-9 OS=Homo sapiens OX=9606 GN=MYH9 PE=1 SV=4	KFDQLLAEEK	2	1	1220.65	610.83	-0.3	54	27.87		0.00165393	4		1	5.60521e+06	1	K.KFDQLLAEEK.T	[1445-1454]	Used	Used
	P35579	Myosin-9 OS=Homo sapiens OX=9606 GN=MYH9 PE=1 SV=4	ADFCIIHYAGK	2	0	1294.62	647.817	1.38	63	33.94	1xCarbamidomethyl [C4]	0.00165393	2		1	489703	1	K.ADFCIIHYAGK.V	[566-576]	Used	Used
	P35579	Myosin-9 OS=Homo sapiens OX=9606 GN=MYH9 PE=1 SV=4	IAQLEEQLDNETKER	4	1	1815.91	908.458	-0.1	60	29.55		0.00165393	1		1	8.37344e+06	2	K.IAQLEEQLDNETKER.Q	[1816-1830]	Used	Used
	P35579	Myosin-9 OS=Homo sapiens OX=9606 GN=MYH9 PE=1 SV=4	IAQLEEQLDNETK	1	0	1530.76	765.886	0.31	35	29.92		0.00165393	1		1	361186	1	K.IAQLEEQLDNETK.E	[1816-1828]	Used	Used
	P35579	Myosin-9 OS=Homo sapiens OX=9606 GN=MYH9 PE=1 SV=4	IAQLEEELEEEQGNTELINDRLKK	1	2	2841.45	947.822	1.12	21			0.00165393	1		1			R.IAQLEEELEEEQGNTELINDRLKK.A	[1731-1754]	Not Used	Not Used
	P35579	Myosin-9 OS=Homo sapiens OX=9606 GN=MYH9 PE=1 SV=4	IAQLEEELEEEQGNTELINDRLK	2	1	2713.35	905.122	-0.08	60	44.16		0.00165393	1		1	1.24423e+06	1	R.IAQLEEELEEEQGNTELINDRLK.K	[1731-1753]	Used	Used
	P35579	Myosin-9 OS=Homo sapiens OX=9606 GN=MYH9 PE=1 SV=4	IAQLEEELEEEQGNTELINDR	3	0	2472.17	824.729	-0.7	96	42.48		0.00165393	1		1	162781	1	R.IAQLEEELEEEQGNTELINDR.L	[1731-1751]	Used	Used
	P35579	Myosin-9 OS=Homo sapiens OX=9606 GN=MYH9 PE=1 SV=4	DLQGRDEQSEEK	2	1	1433.65	717.329	0.83	34	15.42		0.0024483	1		1	318107	1	R.DLQGRDEQSEEK.K	[1572-1583]	Used	Used
	P35579	Myosin-9 OS=Homo sapiens OX=9606 GN=MYH9 PE=1 SV=4	LKDVLLQVDDERR	3	2	1598.89	533.634	0.87	8	30.99		0.0024483	1		1	3.07813e+06	2	K.LKDVLLQVDDERR.N	[1844-1856]	Used	Used
	P35579	Myosin-9 OS=Homo sapiens OX=9606 GN=MYH9 PE=1 SV=4	TEMEDLMSSKDDVGK	1	1	1700.74	850.872	0.53	36	21.72	1xOxidation [M7]	0.0024483	1		1	274905	1	R.TEMEDLMSSKDDVGK.S	[1504-1518]	Used	Used
	P35579	Myosin-9 OS=Homo sapiens OX=9606 GN=MYH9 PE=1 SV=4	DLEGLSQRHEEK	5	1	1440.71	720.858	0.12	17	20.26		0.0024483	1		1	1.64827e+06	2	K.DLEGLSQRHEEK.V	[1393-1404]	Used	Used
	P35579	Myosin-9 OS=Homo sapiens OX=9606 GN=MYH9 PE=1 SV=4	KLQAQMK	2	1	846.487	423.747	-0.17	30	15.93		0.0024483	3		1	5.56337e+06	1	R.KLQAQMK.D	[1642-1648]	Used	Used
	P35579	Myosin-9 OS=Homo sapiens OX=9606 GN=MYH9 PE=1 SV=4	VSHLLGINVTDFTR	1	0	1571.85	786.431	0.81	12	44.47		0.00339245	1		1	145597	1	K.VSHLLGINVTDFTR.G	[374-387]	Used	Used
	P35579	Myosin-9 OS=Homo sapiens OX=9606 GN=MYH9 PE=1 SV=4	AKQTLENERGELANEVK	5	2	1929	643.673	1.18	7	23.46		0.00411958	1		1	4.09097e+06	2	K.AKQTLENERGELANEVK.V	[1218-1234]	Used	Used
	P35579	Myosin-9 OS=Homo sapiens OX=9606 GN=MYH9 PE=1 SV=4	ATDKSFVEK	1	1	1024.53	512.77	1	30	16.76		0.00411958	3		1	1.90614e+06	1	K.ATDKSFVEK.V	[537-545]	Used	Used
	P35579	Myosin-9 OS=Homo sapiens OX=9606 GN=MYH9 PE=1 SV=4	QLEEAEEEAQRANASR	1	1	1830.86	915.933	0.35	42			0.00411958	1		1			R.QLEEAEEEAQRANASR.R	[1878-1893]	Not Used	Not Used
	P35579	Myosin-9 OS=Homo sapiens OX=9606 GN=MYH9 PE=1 SV=4	TDLLLEPYNKYR	2	1	1524.81	762.907	0.3	21	35.89		0.00411958	1		1	818496	1	K.TDLLLEPYNKYR.F	[290-301]	Used	Used
	P35579	Myosin-9 OS=Homo sapiens OX=9606 GN=MYH9 PE=1 SV=4	NLPIYSEEIVEMYK	1	0	1727.86	864.432	0.28	10			0.00456775	1		1			K.NLPIYSEEIVEMYK.G	[126-139]	Not Used	Not Used
	P35579	Myosin-9 OS=Homo sapiens OX=9606 GN=MYH9 PE=1 SV=4	LDPHLVLDQLR	2	0	1318.75	659.877	-0.42	35	41.9		0.00456775	2		1	673091	1	K.LDPHLVLDQLR.C	[683-693]	Used	Used
	P35579	Myosin-9 OS=Homo sapiens OX=9606 GN=MYH9 PE=1 SV=4	SMMQDREDQSILCTGESGAGK	1	1	2300	767.337	0.07	13		1xCarbamidomethyl [C13]	0.00456775	1		1			R.SMMQDREDQSILCTGESGAGK.T	[160-180]	Not Used	Not Used
	P35579	Myosin-9 OS=Homo sapiens OX=9606 GN=MYH9 PE=1 SV=4	EMEAELEDERKQR	2	2	1662.78	554.93	0.5	8	22.15		0.00456775	1		1	1.13395e+06	2	R.EMEAELEDERKQR.S	[1593-1605]	Used	Used
	P35579	Myosin-9 OS=Homo sapiens OX=9606 GN=MYH9 PE=1 SV=4	ASREEILAQAK	2	1	1215.67	608.338	0.03	34	19.79		0.00456775	1		1	2497013	1	R.ASREEILAQAK.E	[1659-1669]	Used	Used
	P35579	Myosin-9 OS=Homo sapiens OX=9606 GN=MYH9 PE=1 SV=4	VAAYDKLEK	2	1	1036.57	518.787	0.01	36	19.01		0.00456775	1		1	6615300	1	K.VAAYDKLEK.T	[1405-1413]	Used	Used
	P35579	Myosin-9 OS=Homo sapiens OX=9606 GN=MYH9 PE=1 SV=4	DLEGLSQR	1	0	917.469	459.238	0.75	26	22.42		0.00456775	1		1	513081	1	K.DLEGLSQR.H	[1393-1400]	Used	Used
	P35579	Myosin-9 OS=Homo sapiens OX=9606 GN=MYH9 PE=1 SV=4	DLGEELEALK	1	0	1116.58	558.793	-0.37	14	42.66		0.00456775	2		1	193908	1	R.DLGEELEALK.T	[1136-1145]	Used	Used
	P35579	Myosin-9 OS=Homo sapiens OX=9606 GN=MYH9 PE=1 SV=4	RGDLPFVVPR	2	1	1155.66	578.335	-0.69	22	35.41		0.00456775	1		1	993499	1	R.RGDLPFVVPR.R	[1923-1932]	Used	Used
	P35579	Myosin-9 OS=Homo sapiens OX=9606 GN=MYH9 PE=1 SV=4	VRTELADKVTK	1	2	1259.73	630.37	0.15	16	19.2		0.00535372	1		1	570655	1	R.VRTELADKVTK.L	[1267-1277]	Used	Used
P62805	Histone H4 OS=Homo sapiens OX=9606 GN=H4C16 PE=1 SV=2	56	103	11.4	11.36	0	854	1	10	10	44	1.12007e+08	12	0.0124752
	Master Protein Accessions	Master Protein Descriptions	Sequence	# PSMs	# Missed Cleavages	Theo. MH+ [Da]	m/z [Da] (by Search Engine): Mascot	DeltaM [ppm] (by Search Engine): Mascot	Ions Score (by Search Engine): Mascot	Top Apex RT [min]	Modifications	Qvality q-value	# Proteins		# Protein Groups	Abundance: F1764: n/a, Sample, n/a, n/a	Abundances Count: F1764: n/a, Sample, n/a, n/a	Sequence in Protein	Positions in Proteins	Quan Usage	Quan Ratio Usage
	P62805	Histone H4 OS=Homo sapiens OX=9606 GN=H4C16 PE=1 SV=2	ISGLIYEETRGVLK	4	1	1577.89	789.449	0.08	51	39.45		0.00165393	1		1	4875403	2	R.ISGLIYEETRGVLK.V	[47-60]	Used	Used
	P62805	Histone H4 OS=Homo sapiens OX=9606 GN=H4C16 PE=1 SV=2	ISGLIYEETR	2	0	1180.62	590.814	0.29	51	30.9		0.00165393	1		1	14306351	1	R.ISGLIYEETR.G	[47-56]	Used	Used
	P62805	Histone H4 OS=Homo sapiens OX=9606 GN=H4C16 PE=1 SV=2	VFLENVIR	2	0	989.578	495.293	0.3	48	40.11		0.00165393	1		1	10998843	1	K.VFLENVIR.D	[61-68]	Used	Used
	P62805	Histone H4 OS=Homo sapiens OX=9606 GN=H4C16 PE=1 SV=2	VFLENVIRDAVTYTEHAK	5	1	2105.1	702.372	-0.09	38	56.51		0.00165393	1		1	1112726	1	K.VFLENVIRDAVTYTEHAK.R	[61-78]	Used	Used
	P62805	Histone H4 OS=Homo sapiens OX=9606 GN=H4C16 PE=1 SV=2	TVTAMDVVYALK	2	0	1310.7	655.855	-0.09	53	48.54		0.00165393	1		1	554577	1	K.TVTAMDVVYALK.R	[81-92]	Used	Used
	P62805	Histone H4 OS=Homo sapiens OX=9606 GN=H4C16 PE=1 SV=2	TVTAMDVVYALKR	4	1	1466.8	733.905	0.06	78	44.49		0.00165393	1		1	1.29716e+07	2	K.TVTAMDVVYALKR.Q	[81-93]	Used	Used
	P62805	Histone H4 OS=Homo sapiens OX=9606 GN=H4C16 PE=1 SV=2	TVTAMDVVYALKR	5	1	1482.8	741.904	0.93	77	37.58	1xOxidation [M5]	0.00165393	1		1	6371022	3	K.TVTAMDVVYALKR.Q	[81-93]	Used	Used
	P62805	Histone H4 OS=Homo sapiens OX=9606 GN=H4C16 PE=1 SV=2	DNIQGITKPAIR	6	0	1325.75	663.381	0.51	55	24.41		0.00165393	1		1	21182857	2	R.DNIQGITKPAIR.R	[25-36]	Used	Used
	P62805	Histone H4 OS=Homo sapiens OX=9606 GN=H4C16 PE=1 SV=2	KTVTAMDVVYALKR	5	2	1594.9	532.304	-0.91	40	40.92		0.00165393	1		1	1.38014e+06	1	R.KTVTAMDVVYALKR.Q	[80-93]	Used	Used
	P62805	Histone H4 OS=Homo sapiens OX=9606 GN=H4C16 PE=1 SV=2	KTVTAMDVVYALK	2	1	1438.8	719.902	-0.01	53	43.48		0.00165393	1		1	446976	1	R.KTVTAMDVVYALK.R	[80-92]	Used	Used
	P62805	Histone H4 OS=Homo sapiens OX=9606 GN=H4C16 PE=1 SV=2	DAVTYTEHAK	6	0	1134.54	567.775	0.69	49	16.93		0.0024483	1		1	37431284	1	R.DAVTYTEHAK.R	[69-78]	Used	Used
	P62805	Histone H4 OS=Homo sapiens OX=9606 GN=H4C16 PE=1 SV=2	TVTAMDVVYALK	1	0	1326.7	663.852	-0.78	16	40.19	1xOxidation [M5]	0.00456775	1		1	374847	1	K.TVTAMDVVYALK.R	[81-92]	Used	Used
P62328	Thymosin beta-4 OS=Homo sapiens OX=9606 GN=TMSB4X PE=1 SV=2	66	44	5.1	5.06	0	351	1	5	5	24	1.08409e+08	7	0.00680465
	Master Protein Accessions	Master Protein Descriptions	Sequence	# PSMs	# Missed Cleavages	Theo. MH+ [Da]	m/z [Da] (by Search Engine): Mascot	DeltaM [ppm] (by Search Engine): Mascot	Ions Score (by Search Engine): Mascot	Top Apex RT [min]	Modifications	Qvality q-value	# Proteins		# Protein Groups	Abundance: F1764: n/a, Sample, n/a, n/a	Abundances Count: F1764: n/a, Sample, n/a, n/a	Sequence in Protein	Positions in Proteins	Quan Usage	Quan Ratio Usage
	P62328	Thymosin beta-4 OS=Homo sapiens OX=9606 GN=TMSB4X PE=1 SV=2	SDKPDMAEIEK	2	0	1304.6	652.805	-0.16	34	23.92	1xAcetyl [N-Term]	0.00165393	1		1	5.17058e+06	1	M.SDKPDMAEIEK.F	[2-12]	Used	Used
	P62328	Thymosin beta-4 OS=Homo sapiens OX=9606 GN=TMSB4X PE=1 SV=2	SDKPDMAEIEKFDK	6	1	1694.79	565.603	0.51	45	33.09	1xAcetyl [N-Term]	0.00165393	1		1	69833618	2	M.SDKPDMAEIEKFDK.S	[2-15]	Used	Used
	P62328	Thymosin beta-4 OS=Homo sapiens OX=9606 GN=TMSB4X PE=1 SV=2	SDKPDMAEIEKFDK	3	1	1710.79	855.898	-0.08	38	25.65	1xAcetyl [N-Term]; 1xOxidation [M6]	0.00165393	1		1	8.25104e+06	2	M.SDKPDMAEIEKFDK.S	[2-15]	Used	Used
	P62328	Thymosin beta-4 OS=Homo sapiens OX=9606 GN=TMSB4X PE=1 SV=2	SDKPDMAEIEKFDKSK	5	2	1909.92	955.464	0.17	26	29.97	1xAcetyl [N-Term]	0.00165393	1		1	3.27514e+06	3	M.SDKPDMAEIEKFDKSK.L	[2-17]	Used	Used
	P62328	Thymosin beta-4 OS=Homo sapiens OX=9606 GN=TMSB4X PE=1 SV=2	TETQEKNPLPSK	6	1	1371.71	686.359	-0.14	49	17		0.00165393	1		1	20253720	3	K.TETQEKNPLPSK.E	[21-32]	Used	Used
	P62328	Thymosin beta-4 OS=Homo sapiens OX=9606 GN=TMSB4X PE=1 SV=2	KTETQEKNPLPSK	1	2	1499.81	500.607	-0.51	6	18.56		0.00165393	1		1	1.10819e+06	1	K.KTETQEKNPLPSK.E	[20-32]	Used	Used
	P62328	Thymosin beta-4 OS=Homo sapiens OX=9606 GN=TMSB4X PE=1 SV=2	SDKPDMAEIEK	1	0	1320.6	660.803	0.35	30	17.83	1xAcetyl [N-Term]; 1xOxidation [M6]	0.00456775	1		1	516355	1	M.SDKPDMAEIEK.F	[2-12]	Used	Used
P68871	Hemoglobin subunit beta OS=Homo sapiens OX=9606 GN=HBB PE=1 SV=2	84	147	16	7.28	0	2278	1	7	14	120	1.05588e+08	8	0.0340232
	Master Protein Accessions	Master Protein Descriptions	Sequence	# PSMs	# Missed Cleavages	Theo. MH+ [Da]	m/z [Da] (by Search Engine): Mascot	DeltaM [ppm] (by Search Engine): Mascot	Ions Score (by Search Engine): Mascot	Top Apex RT [min]	Modifications	Qvality q-value	# Proteins		# Protein Groups	Abundance: F1764: n/a, Sample, n/a, n/a	Abundances Count: F1764: n/a, Sample, n/a, n/a	Sequence in Protein	Positions in Proteins	Quan Usage	Quan Ratio Usage
	P68871	Hemoglobin subunit beta OS=Homo sapiens OX=9606 GN=HBB PE=1 SV=2	SAVTALWGK	2	0	932.52	466.764	0.01	54	35.75		0.00165393	1		1	21209900	1	K.SAVTALWGK.V	[10-18]	Used	Used
	P68871	Hemoglobin subunit beta OS=Homo sapiens OX=9606 GN=HBB PE=1 SV=2	SAVTALWGKVNVDEVGGEALGR	2	1	2228.17	743.394	0.13	44	47.97		0.00165393	1		1	728250	1	K.SAVTALWGKVNVDEVGGEALGR.L	[10-31]	Used	Used
	P02042; P68871	Hemoglobin subunit delta OS=Homo sapiens OX=9606 GN=HBD PE=1 SV=2 Hemoglobin subunit beta OS=Homo sapiens OX=9606 GN=HBB PE=1 SV=2	LLVVYPWTQR	2	0	1274.73	637.866	-0.03	27	46.63		0.00165393	5		2	14962752	1	R.LLVVYPWTQR.F	[32-41]	Not Used	Not Used
	P02042; P68871	Hemoglobin subunit delta OS=Homo sapiens OX=9606 GN=HBD PE=1 SV=2 Hemoglobin subunit beta OS=Homo sapiens OX=9606 GN=HBB PE=1 SV=2	VLGAFSDGLAHLDNLK	9	0	1669.89	835.449	-0.14	59	45.87		0.00165393	2		2	2.48662e+07	3	K.VLGAFSDGLAHLDNLK.G	[68-83]	Not Used	Not Used
	P68871	Hemoglobin subunit beta OS=Homo sapiens OX=9606 GN=HBB PE=1 SV=2	VNVDEVGGEALGR	6	0	1314.66	657.836	0.06	71	29.08		0.00165393	1		1	4.84269e+07	2	K.VNVDEVGGEALGR.L	[19-31]	Used	Used
	P02042; P68871	Hemoglobin subunit delta OS=Homo sapiens OX=9606 GN=HBD PE=1 SV=2 Hemoglobin subunit beta OS=Homo sapiens OX=9606 GN=HBB PE=1 SV=2	VHLTPEEK	9	0	952.51	476.759	-0.07	37	17.12		0.00165393	2		2	221190173	2	M.VHLTPEEK.S	[2-9]	Not Used	Not Used
	P02042; P68871	Hemoglobin subunit delta OS=Homo sapiens OX=9606 GN=HBD PE=1 SV=2 Hemoglobin subunit beta OS=Homo sapiens OX=9606 GN=HBB PE=1 SV=2	VVAGVANALAHK	5	0	1149.67	575.34	-0.56	55	23.93		0.00165393	2		2	27056082	1	K.VVAGVANALAHK.Y	[134-145]	Not Used	Not Used
	P02042; P68871	Hemoglobin subunit delta OS=Homo sapiens OX=9606 GN=HBD PE=1 SV=2 Hemoglobin subunit beta OS=Homo sapiens OX=9606 GN=HBB PE=1 SV=2	VVAGVANALAHKYH	38	1	1449.8	725.401	-1.07	80	26.7		0.00165393	2		2	1.40032e+08	7	K.VVAGVANALAHKYH.-	[134-147]	Not Used	Not Used
	P68871	Hemoglobin subunit beta OS=Homo sapiens OX=9606 GN=HBB PE=1 SV=2	FFESFGDLSTPDAVMGNPK	2	0	2074.94	1037.97	-3.31	69	44.11	1xOxidation [M15]	0.00165393	1		1	1.22093e+06	1	R.FFESFGDLSTPDAVMGNPK.V	[42-60]	Used	Used
	P68871	Hemoglobin subunit beta OS=Homo sapiens OX=9606 GN=HBB PE=1 SV=2	FFESFGDLSTPDAVMGNPK	4	0	2058.95	1029.98	-0.22	39	48.78		0.00165393	1		1	7722471	1	R.FFESFGDLSTPDAVMGNPK.V	[42-60]	Used	Used
	P68871	Hemoglobin subunit beta OS=Homo sapiens OX=9606 GN=HBB PE=1 SV=2	EFTPPVQAAYQK	4	0	1378.7	689.854	0.15	41	28.24		0.00165393	1		1	22660672	1	K.EFTPPVQAAYQK.V	[122-133]	Used	Used
	P02042; P68871	Hemoglobin subunit delta OS=Homo sapiens OX=9606 GN=HBD PE=1 SV=2 Hemoglobin subunit beta OS=Homo sapiens OX=9606 GN=HBB PE=1 SV=2	KVLGAFSDGLAHLDNLK	9	1	1797.99	899.496	-0.67	68	43.09		0.00165393	2		2	9.42747e+06	2	K.KVLGAFSDGLAHLDNLK.G	[67-83]	Not Used	Not Used
	P68871	Hemoglobin subunit beta OS=Homo sapiens OX=9606 GN=HBB PE=1 SV=2	GTFATLSELHCDK	2	0	1478.69	739.851	0.38	65	31.36	1xCarbamidomethyl [C11]	0.00165393	1		1	2677645	1	K.GTFATLSELHCDK.L	[84-96]	Used	Used
	P68871	Hemoglobin subunit beta OS=Homo sapiens OX=9606 GN=HBB PE=1 SV=2	GTFATLSELHCDKLHVDPENFR	21	1	2586.24	862.752	0.05	19	52.82	1xCarbamidomethyl [C11]	0.00165393	1		1	941068	2	K.GTFATLSELHCDKLHVDPENFR.L	[84-105]	Used	Used
	P02042; P68871	Hemoglobin subunit delta OS=Homo sapiens OX=9606 GN=HBD PE=1 SV=2 Hemoglobin subunit beta OS=Homo sapiens OX=9606 GN=HBB PE=1 SV=2	LHVDPENFR	5	0	1126.56	563.786	0	17	26.51		0.0024483	2		2	13018737	1	K.LHVDPENFR.L	[97-105]	Not Used	Not Used
P61626	Lysozyme C OS=Homo sapiens OX=9606 GN=LYZ PE=1 SV=1	52	148	16.5	9.16	0	468	1	6	6	15	7.17675e+07	6	0.00425291
	Master Protein Accessions	Master Protein Descriptions	Sequence	# PSMs	# Missed Cleavages	Theo. MH+ [Da]	m/z [Da] (by Search Engine): Mascot	DeltaM [ppm] (by Search Engine): Mascot	Ions Score (by Search Engine): Mascot	Top Apex RT [min]	Modifications	Qvality q-value	# Proteins		# Protein Groups	Abundance: F1764: n/a, Sample, n/a, n/a	Abundances Count: F1764: n/a, Sample, n/a, n/a	Sequence in Protein	Positions in Proteins	Quan Usage	Quan Ratio Usage
	P61626	Lysozyme C OS=Homo sapiens OX=9606 GN=LYZ PE=1 SV=1	STDYGIFQINSR	3	0	1400.68	700.844	0.1	71	39.84		0.00165393	1		1	14149916	1	R.STDYGIFQINSR.Y	[69-80]	Used	Used
	P61626	Lysozyme C OS=Homo sapiens OX=9606 GN=LYZ PE=1 SV=1	TPGAVNACHLSCSALLQDNIADAVACAK	2	0	2927.38	976.466	1	73	45.25	3xCarbamidomethyl [C8; C12; C26]	0.00165393	1		1	1.92317e+06	1	K.TPGAVNACHLSCSALLQDNIADAVACAK.R	[88-115]	Used	Used
	P61626	Lysozyme C OS=Homo sapiens OX=9606 GN=LYZ PE=1 SV=1	ATNYNAGDRSTDYGIFQINSR	3	1	2363.1	788.371	-0.83	52	37.23		0.00165393	1		1	2.50772e+06	2	R.ATNYNAGDRSTDYGIFQINSR.Y	[60-80]	Used	Used
	P61626	Lysozyme C OS=Homo sapiens OX=9606 GN=LYZ PE=1 SV=1	GISLANWMCLAK	1	0	1363.69	682.347	0.09	86	54.04	1xCarbamidomethyl [C9]	0.00165393	1		1	773814	1	R.GISLANWMCLAK.W	[40-51]	Used	Used
	P61626	Lysozyme C OS=Homo sapiens OX=9606 GN=LYZ PE=1 SV=1	VVRDPQGIR	4	1	1039.6	520.304	0.04	38	16.83		0.00411958	1		1	50307516	1	R.VVRDPQGIR.A	[117-125]	Used	Used
	P61626	Lysozyme C OS=Homo sapiens OX=9606 GN=LYZ PE=1 SV=1	YWCNDGK	2	0	942.377	471.692	0.25	21	18.14	1xCarbamidomethyl [C3]	0.00535372	1		1	2105347	1	R.YWCNDGK.T	[81-87]	Used	Used
P11678	Eosinophil peroxidase OS=Homo sapiens OX=9606 GN=EPX PE=1 SV=2	32	715	81	10.29	0	1068	1	20	24	110	7.1422e+07	18	0.031188
	Master Protein Accessions	Master Protein Descriptions	Sequence	# PSMs	# Missed Cleavages	Theo. MH+ [Da]	m/z [Da] (by Search Engine): Mascot	DeltaM [ppm] (by Search Engine): Mascot	Ions Score (by Search Engine): Mascot	Top Apex RT [min]	Modifications	Qvality q-value	# Proteins		# Protein Groups	Abundance: F1764: n/a, Sample, n/a, n/a	Abundances Count: F1764: n/a, Sample, n/a, n/a	Sequence in Protein	Positions in Proteins	Quan Usage	Quan Ratio Usage
	P11678	Eosinophil peroxidase OS=Homo sapiens OX=9606 GN=EPX PE=1 SV=2	QDAMLVDELRDR	1	1	1460.72	730.862	-0.02	40	34.13		0.00165393	1		1	1.49611e+06	1	R.QDAMLVDELRDR.L	[532-543]	Used	Used
	P11678	Eosinophil peroxidase OS=Homo sapiens OX=9606 GN=EPX PE=1 SV=2	NGFLLPLVR	2	0	1028.63	514.816	0.47	33	50.96		0.00165393	1		1	833093	1	R.NGFLLPLVR.A	[192-200]	Used	Used
	P11678	Eosinophil peroxidase OS=Homo sapiens OX=9606 GN=EPX PE=1 SV=2	RIGLDLAALNMQR	4	1	1470.82	490.945	-0.19	43	42.94		0.00165393	1		1	2.39669e+06	2	R.RIGLDLAALNMQR.S	[550-562]	Used	Used
	P11678	Eosinophil peroxidase OS=Homo sapiens OX=9606 GN=EPX PE=1 SV=2	RPLLGASNQALAR	4	0	1366.79	456.269	0.21	55	24.17		0.00165393	1		1	19056678	2	R.RPLLGASNQALAR.W	[157-169]	Used	Used
	P11678	Eosinophil peroxidase OS=Homo sapiens OX=9606 GN=EPX PE=1 SV=2	RRPLLGASNQALAR	34	1	1522.89	508.302	-0.23	30	36.39		0.00165393	1		1	8.05648e+06	14	K.RRPLLGASNQALAR.W	[156-169]	Used	Used
	P11678	Eosinophil peroxidase OS=Homo sapiens OX=9606 GN=EPX PE=1 SV=2	IICDNTGITTVSR	2	0	1449.74	725.372	0.19	85	24.84	1xCarbamidomethyl [C3]	0.00165393	1		1	1.05639e+06	1	R.IICDNTGITTVSR.D	[674-686]	Used	Used
	P11678	Eosinophil peroxidase OS=Homo sapiens OX=9606 GN=EPX PE=1 SV=2	IGLDLAALNMQR	1	0	1314.72	657.865	1.74	68	47.2		0.00165393	1		1	914304	1	R.IGLDLAALNMQR.S	[551-562]	Used	Used
	P11678	Eosinophil peroxidase OS=Homo sapiens OX=9606 GN=EPX PE=1 SV=2	IVYEGGIDPILR	2	0	1344.75	672.88	0.22	36	40.41		0.00165393	1		1	723235	1	R.IVYEGGIDPILR.G	[509-520]	Used	Used
	P05164; P11678	Myeloperoxidase OS=Homo sapiens OX=9606 GN=MPO PE=1 SV=1 Eosinophil peroxidase OS=Homo sapiens OX=9606 GN=EPX PE=1 SV=2	IPCFLAGDTR	4	0	1149.57	575.29	0.27	48	35.61	1xCarbamidomethyl [C3]	0.00165393	2		2	12383892	1	R.IPCFLAGDTR.S	[368-377]	Not Used	Not Used
	P11678	Eosinophil peroxidase OS=Homo sapiens OX=9606 GN=EPX PE=1 SV=2	WLPAEYEDGLSLPFGWTPSR	3	0	2321.12	1161.06	-0.71	26			0.00165393	1		1			R.WLPAEYEDGLSLPFGWTPSR.R	[170-189]	Not Used	Not Used
	P11678	Eosinophil peroxidase OS=Homo sapiens OX=9606 GN=EPX PE=1 SV=2	TCAQLPPCFPIKIPPNDPR	15	1	2221.13	741.047	-0.11	7	40.77	2xCarbamidomethyl [C2; C8]	0.00165393	1		1	8.66686e+06	5	R.TCAQLPPCFPIKIPPNDPR.I	[256-274]	Used	Used
	P05164; P11678	Myeloperoxidase OS=Homo sapiens OX=9606 GN=MPO PE=1 SV=1 Eosinophil peroxidase OS=Homo sapiens OX=9606 GN=EPX PE=1 SV=2	SRDHGLPGYNAWR	18	1	1528.74	510.252	0.14	19	52.59		0.00165393	2		2	1.63617e+06	3	R.SRDHGLPGYNAWR.R	[563-575]	Not Used	Not Used
	P11678	Eosinophil peroxidase OS=Homo sapiens OX=9606 GN=EPX PE=1 SV=2	VANVFTLAFR	2	0	1137.64	569.324	-0.78	67			0.00165393	1		1			R.VANVFTLAFR.F	[462-471]	Not Used	Not Used
	P11678	Eosinophil peroxidase OS=Homo sapiens OX=9606 GN=EPX PE=1 SV=2	TNYLGLLAINQR	2	0	1375.77	688.388	-0.17	53	47.22		0.00165393	1		1	641503	1	R.TNYLGLLAINQR.F	[329-340]	Used	Used
	P11678	Eosinophil peroxidase OS=Homo sapiens OX=9606 GN=EPX PE=1 SV=2	FGHTMLQPFMFR	1	0	1511.73	756.368	0.71	26	47.7		0.00165393	1		1	212862	1	R.FGHTMLQPFMFR.L	[472-483]	Used	Used
	P05164; P11678	Myeloperoxidase OS=Homo sapiens OX=9606 GN=MPO PE=1 SV=1 Eosinophil peroxidase OS=Homo sapiens OX=9606 GN=EPX PE=1 SV=2	DHGLPGYNAWR	3	0	1285.61	643.307	-0.06	27	31.41		0.00165393	2		2	6010232	1	R.DHGLPGYNAWR.R	[565-575]	Not Used	Not Used
	P11678	Eosinophil peroxidase OS=Homo sapiens OX=9606 GN=EPX PE=1 SV=2	AVSNQIVRFPNER	2	1	1529.82	510.61	-2.02	16	29.29		0.00165393	1		1	3.82156e+06	1	R.AVSNQIVRFPNER.L	[201-213]	Used	Used
	P11678	Eosinophil peroxidase OS=Homo sapiens OX=9606 GN=EPX PE=1 SV=2	LAAMHTLFMR	2	0	1206.61	603.81	0.84	36	33.78	1xOxidation [M9]	0.00165393	1		1	637915	1	K.LAAMHTLFMR.E	[384-393]	Used	Used
	P05164; P11678	Myeloperoxidase OS=Homo sapiens OX=9606 GN=MPO PE=1 SV=1 Eosinophil peroxidase OS=Homo sapiens OX=9606 GN=EPX PE=1 SV=2	GLMATPAKLNR	1	1	1171.66	586.335	0.79	26	23.6		0.0024483	2		2	3426687	1	R.GLMATPAKLNR.Q	[521-531]	Not Used	Not Used
	P11678	Eosinophil peroxidase OS=Homo sapiens OX=9606 GN=EPX PE=1 SV=2	AVSNQIVR	2	0	886.51	443.759	0.53	37	18.42		0.0024483	1		1	5368175	1	R.AVSNQIVR.F	[201-208]	Used	Used
	P11678	Eosinophil peroxidase OS=Homo sapiens OX=9606 GN=EPX PE=1 SV=2	FCGLSQPR	2	0	964.467	482.737	0.72	33	22.57	1xCarbamidomethyl [C2]	0.0024483	1		1	3.67814e+06	1	R.FCGLSQPR.N	[577-584]	Used	Used
	P11678	Eosinophil peroxidase OS=Homo sapiens OX=9606 GN=EPX PE=1 SV=2	DGDRFWWQK	1	1	1237.57	619.29	-1.18	16	38.79		0.00456775	1		1	2.23663e+06	1	R.DGDRFWWQK.R	[646-654]	Used	Used
	P11678	Eosinophil peroxidase OS=Homo sapiens OX=9606 GN=EPX PE=1 SV=2	VLKNQDLAR	1	1	1056.62	528.811	-1.2	22	16.72		0.00456775	1		1	6.30463e+06	1	R.VLKNQDLAR.K	[592-600]	Used	Used
	P11678	Eosinophil peroxidase OS=Homo sapiens OX=9606 GN=EPX PE=1 SV=2	RFCGLSQPR	1	1	1120.57	560.788	0.82	29	21.05	1xCarbamidomethyl [C3]	0.00839836	1		1	5320757	1	R.RFCGLSQPR.N	[576-584]	Used	Used
P04406	Glyceraldehyde-3-phosphate dehydrogenase OS=Homo sapiens OX=9606 GN=GAPDH PE=1 SV=3	55	335	36	8.46	0	1295	1	13	13	52	6.93795e+07	17	0.0147434
	Master Protein Accessions	Master Protein Descriptions	Sequence	# PSMs	# Missed Cleavages	Theo. MH+ [Da]	m/z [Da] (by Search Engine): Mascot	DeltaM [ppm] (by Search Engine): Mascot	Ions Score (by Search Engine): Mascot	Top Apex RT [min]	Modifications	Qvality q-value	# Proteins		# Protein Groups	Abundance: F1764: n/a, Sample, n/a, n/a	Abundances Count: F1764: n/a, Sample, n/a, n/a	Sequence in Protein	Positions in Proteins	Quan Usage	Quan Ratio Usage
	P04406	Glyceraldehyde-3-phosphate dehydrogenase OS=Homo sapiens OX=9606 GN=GAPDH PE=1 SV=3	IKWGDAGAEYVVESTGVFTTMEK	1	1	2518.22	840.077	0	28	52.25		0.00165393	1		1	202235	1	K.IKWGDAGAEYVVESTGVFTTMEK.A	[85-107]	Used	Used
	P04406	Glyceraldehyde-3-phosphate dehydrogenase OS=Homo sapiens OX=9606 GN=GAPDH PE=1 SV=3	IISNASCTTNCLAPLAK	2	0	1833.92	917.464	0.27	72	31.08	2xCarbamidomethyl [C7; C11]	0.00165393	1		1	2.0849e+06	1	K.IISNASCTTNCLAPLAK.V	[146-162]	Used	Used
	P04406	Glyceraldehyde-3-phosphate dehydrogenase OS=Homo sapiens OX=9606 GN=GAPDH PE=1 SV=3	LISWYDNEFGYSNR	2	0	1763.8	882.405	0.26	78	45.15		0.00165393	1		1	1.88127e+06	1	K.LISWYDNEFGYSNR.V	[310-323]	Used	Used
	P04406	Glyceraldehyde-3-phosphate dehydrogenase OS=Homo sapiens OX=9606 GN=GAPDH PE=1 SV=3	VIHDNFGIVEGLMTTVHAITATQK	4	0	2595.36	865.791	-0.7	44	59.73		0.00165393	1		1	356839	1	K.VIHDNFGIVEGLMTTVHAITATQK.T	[163-186]	Used	Used
	P04406	Glyceraldehyde-3-phosphate dehydrogenase OS=Homo sapiens OX=9606 GN=GAPDH PE=1 SV=3	VIHDNFGIVEGLMTTVHAITATQK	2	0	2611.35	871.123	0.39	48	54.53	1xOxidation [M13]	0.00165393	1		1	510146	1	K.VIHDNFGIVEGLMTTVHAITATQK.T	[163-186]	Used	Used
	P04406	Glyceraldehyde-3-phosphate dehydrogenase OS=Homo sapiens OX=9606 GN=GAPDH PE=1 SV=3	VIISAPSADAPMFVMGVNHEKYDNSLK	3	1	2933.45	978.489	-0.72	31	44.24		0.00165393	1		1	1.23428e+06	2	R.VIISAPSADAPMFVMGVNHEKYDNSLK.I	[119-145]	Used	Used
	P04406	Glyceraldehyde-3-phosphate dehydrogenase OS=Homo sapiens OX=9606 GN=GAPDH PE=1 SV=3	VPTANVSVVDLTCR	2	0	1530.79	765.901	-0.18	80	35.53	1xCarbamidomethyl [C13]	0.00165393	1		1	488112	1	R.VPTANVSVVDLTCR.L	[235-248]	Used	Used
	P04406	Glyceraldehyde-3-phosphate dehydrogenase OS=Homo sapiens OX=9606 GN=GAPDH PE=1 SV=3	VPTANVSVVDLTCRLEKPAK	2	1	2197.2	733.072	0.48	12	38.9	1xCarbamidomethyl [C13]	0.00165393	1		1	578577	1	R.VPTANVSVVDLTCRLEKPAK.Y	[235-254]	Used	Used
	P04406	Glyceraldehyde-3-phosphate dehydrogenase OS=Homo sapiens OX=9606 GN=GAPDH PE=1 SV=3	VDIVAINDPFIDLNYMVYMFQYDSTHGK	2	0	3308.56	1103.53	0.65	26			0.00165393	1		1			K.VDIVAINDPFIDLNYMVYMFQYDSTHGK.F	[28-55]	Not Used	Not Used
	P04406	Glyceraldehyde-3-phosphate dehydrogenase OS=Homo sapiens OX=9606 GN=GAPDH PE=1 SV=3	VDIVAINDPFIDLNYMVYMFQYDSTHGK	2	0	3324.56	1108.86	-2.13	17		1xOxidation [M]	0.00165393	1		1			K.VDIVAINDPFIDLNYMVYMFQYDSTHGK.F	[28-55]	Not Used	Not Used
	P04406	Glyceraldehyde-3-phosphate dehydrogenase OS=Homo sapiens OX=9606 GN=GAPDH PE=1 SV=3	VDIVAINDPFIDLNYMVYMFQYDSTHGK	3	0	3340.55	1114.19	0.56	10	60.24	2xOxidation [M16; M19]	0.00165393	1		1	129458	1	K.VDIVAINDPFIDLNYMVYMFQYDSTHGK.F	[28-55]	Used	Used
	P04406	Glyceraldehyde-3-phosphate dehydrogenase OS=Homo sapiens OX=9606 GN=GAPDH PE=1 SV=3	VVDLMAHMASK	2	0	1201.61	601.307	0.58	59	30.3		0.00165393	1		1	1.07218e+06	1	R.VVDLMAHMASK.E	[324-334]	Used	Used
	P04406	Glyceraldehyde-3-phosphate dehydrogenase OS=Homo sapiens OX=9606 GN=GAPDH PE=1 SV=3	VVDLMAHMASKE	10	1	1330.65	665.829	0.63	58	31.18		0.00165393	1		1	43660436	2	R.VVDLMAHMASKE.-	[324-335]	Used	Used
	P04406	Glyceraldehyde-3-phosphate dehydrogenase OS=Homo sapiens OX=9606 GN=GAPDH PE=1 SV=3	VVDLMAHMASKE	2	1	1346.64	673.826	0.19	51	22.86	1xOxidation [M5]	0.00165393	1		1	3.65448e+06	1	R.VVDLMAHMASKE.-	[324-335]	Used	Used
	P04406	Glyceraldehyde-3-phosphate dehydrogenase OS=Homo sapiens OX=9606 GN=GAPDH PE=1 SV=3	VVDLMAHMASKE	2	1	1362.64	681.823	-0.56	50	18.04	2xOxidation [M5; M8]	0.00165393	1		1	489136	1	R.VVDLMAHMASKE.-	[324-335]	Used	Used
	P04406	Glyceraldehyde-3-phosphate dehydrogenase OS=Homo sapiens OX=9606 GN=GAPDH PE=1 SV=3	WGDAGAEYVVESTGVFTTMEK	4	0	2277.04	1139.02	-0.21	68	52.41		0.00165393	1		1	253574	1	K.WGDAGAEYVVESTGVFTTMEK.A	[87-107]	Used	Used
	P04406	Glyceraldehyde-3-phosphate dehydrogenase OS=Homo sapiens OX=9606 GN=GAPDH PE=1 SV=3	WGDAGAEYVVESTGVFTTMEK	2	0	2293.03	1147.02	-1.34	76	47.36	1xOxidation [M19]	0.00165393	1		1	157490	1	K.WGDAGAEYVVESTGVFTTMEK.A	[87-107]	Used	Used
	P04406	Glyceraldehyde-3-phosphate dehydrogenase OS=Homo sapiens OX=9606 GN=GAPDH PE=1 SV=3	DGRGALQNIIPASTGAAK	3	1	1739.94	870.474	0.54	59	33.09		0.00165393	1		1	2.85155e+06	2	R.DGRGALQNIIPASTGAAK.A	[198-215]	Used	Used
	P04406	Glyceraldehyde-3-phosphate dehydrogenase OS=Homo sapiens OX=9606 GN=GAPDH PE=1 SV=3	GALQNIIPASTGAAK	2	0	1411.79	706.398	-0.85	31	34.54		0.0024483	1		1	9774879	1	R.GALQNIIPASTGAAK.A	[201-215]	Used	Used
P29401	Transketolase OS=Homo sapiens OX=9606 GN=TKT PE=1 SV=3	30	623	67.8	7.66	0	678	1	15	15	40	6.63611e+07	14	0.0113411
	Master Protein Accessions	Master Protein Descriptions	Sequence	# PSMs	# Missed Cleavages	Theo. MH+ [Da]	m/z [Da] (by Search Engine): Mascot	DeltaM [ppm] (by Search Engine): Mascot	Ions Score (by Search Engine): Mascot	Top Apex RT [min]	Modifications	Qvality q-value	# Proteins		# Protein Groups	Abundance: F1764: n/a, Sample, n/a, n/a	Abundances Count: F1764: n/a, Sample, n/a, n/a	Sequence in Protein	Positions in Proteins	Quan Usage	Quan Ratio Usage
	P29401	Transketolase OS=Homo sapiens OX=9606 GN=TKT PE=1 SV=3	ILATPPQEDAPSVDIANIR	4	0	2020.07	1010.54	0.35	78	39.76		0.00165393	1		1	1.50025e+06	2	K.ILATPPQEDAPSVDIANIR.M	[284-302]	Used	Used
	P29401	Transketolase OS=Homo sapiens OX=9606 GN=TKT PE=1 SV=3	ISSDLDGHPVPK	2	0	1264.65	632.831	0.6	69	20.45		0.00165393	1		1	1.32149e+06	1	K.ISSDLDGHPVPK.Q	[103-114]	Used	Used
	P29401	Transketolase OS=Homo sapiens OX=9606 GN=TKT PE=1 SV=3	MESYHKPDQQK	4	0	1432.65	716.829	-0.83	40	17.46	1xAcetyl [N-Term]	0.00165393	1		1	2.89255e+06	1	-.MESYHKPDQQK.L	[1-11]	Used	Used
	P29401	Transketolase OS=Homo sapiens OX=9606 GN=TKT PE=1 SV=3	MESYHKPDQQK	3	0	1448.65	724.828	0.68	38	15.45	1xAcetyl [N-Term]; 1xOxidation [M1]	0.00165393	1		1	1.14175e+06	2	-.MESYHKPDQQK.L	[1-11]	Used	Used
	P29401	Transketolase OS=Homo sapiens OX=9606 GN=TKT PE=1 SV=3	MFGIDRDAIAQAVR	4	1	1562.81	781.908	-1.9	53	40.13		0.00165393	1		1	5.34251e+06	2	K.MFGIDRDAIAQAVR.G	[604-617]	Used	Used
	P29401	Transketolase OS=Homo sapiens OX=9606 GN=TKT PE=1 SV=3	LQALKDTANR	3	1	1129.63	565.32	-0.02	35	17.43		0.00165393	1		1	5281991	1	K.LQALKDTANR.L	[12-21]	Used	Used
	P29401	Transketolase OS=Homo sapiens OX=9606 GN=TKT PE=1 SV=3	VLDPFTIKPLDR	3	0	1413.81	707.408	-0.99	47	44.02		0.00165393	1		1	4.82309e+06	2	R.VLDPFTIKPLDR.K	[531-542]	Used	Used
	P29401	Transketolase OS=Homo sapiens OX=9606 GN=TKT PE=1 SV=3	SVPTSTVFYPSDGVATEK	2	0	1884.92	942.966	0.78	32	33.9		0.00165393	1		1	373619	1	R.SVPTSTVFYPSDGVATEK.A	[439-456]	Used	Used
	P29401	Transketolase OS=Homo sapiens OX=9606 GN=TKT PE=1 SV=3	TSRPENAIIYNNNEDFQVGQAK	2	0	2508.21	836.742	0.57	42	31.61		0.00165393	1		1	951564	1	R.TSRPENAIIYNNNEDFQVGQAK.V	[472-493]	Used	Used
	P29401	Transketolase OS=Homo sapiens OX=9606 GN=TKT PE=1 SV=3	GHAAPILYAVWAEAGFLAEAELLNLR	1	0	2795.49	932.501	0.63	26			0.00165393	1		1			K.GHAAPILYAVWAEAGFLAEAELLNLR.K	[76-101]	Not Used	Not Used
	P29401	Transketolase OS=Homo sapiens OX=9606 GN=TKT PE=1 SV=3	KILATPPQEDAPSVDIANIR	2	1	2148.17	716.727	-0.19	28	37.11		0.00165393	1		1	705792	1	K.KILATPPQEDAPSVDIANIR.M	[283-302]	Used	Used
	P29401	Transketolase OS=Homo sapiens OX=9606 GN=TKT PE=1 SV=3	IIALDGDTK	1	0	945.525	473.266	0.59	26	24.72		0.0024483	1		1	909201	1	R.IIALDGDTK.N	[335-343]	Used	Used
	P29401	Transketolase OS=Homo sapiens OX=9606 GN=TKT PE=1 SV=3	SGKPAELLK	3	0	942.562	471.785	0.1	27	19.53		0.0024483	1		1	20561076	1	R.SGKPAELLK.M	[595-603]	Used	Used
	P29401	Transketolase OS=Homo sapiens OX=9606 GN=TKT PE=1 SV=3	KAYGQALAK	2	1	949.547	475.276	-1.22	38	16.48		0.0024483	1		1	13917760	1	R.KAYGQALAK.L	[319-327]	Used	Used
	P29401	Transketolase OS=Homo sapiens OX=9606 GN=TKT PE=1 SV=3	KLILDSAR	3	1	915.562	458.284	-0.66	36	21.82		0.00456775	1		1	6638501	1	R.KLILDSAR.A	[543-550]	Used	Used
	P29401	Transketolase OS=Homo sapiens OX=9606 GN=TKT PE=1 SV=3	SVPTSTVFYPSDGVATEKAVELAANTK	1	1	2782.41	928.142	-0.81	11			0.00456775	1		1			R.SVPTSTVFYPSDGVATEKAVELAANTK.G	[439-465]	Not Used	Not Used
P60709	Actin, cytoplasmic 1 OS=Homo sapiens OX=9606 GN=ACTB PE=1 SV=1	74	375	41.7	5.48	0	1929	1	11	24	109	6.01613e+07	14	0.0309045
	Master Protein Accessions	Master Protein Descriptions	Sequence	# PSMs	# Missed Cleavages	Theo. MH+ [Da]	m/z [Da] (by Search Engine): Mascot	DeltaM [ppm] (by Search Engine): Mascot	Ions Score (by Search Engine): Mascot	Top Apex RT [min]	Modifications	Qvality q-value	# Proteins		# Protein Groups	Abundance: F1764: n/a, Sample, n/a, n/a	Abundances Count: F1764: n/a, Sample, n/a, n/a	Sequence in Protein	Positions in Proteins	Quan Usage	Quan Ratio Usage
	P60709; P62736	Actin, cytoplasmic 1 OS=Homo sapiens OX=9606 GN=ACTB PE=1 SV=1 Actin, aortic smooth muscle OS=Homo sapiens OX=9606 GN=ACTA2 PE=1 SV=1	MQKEITALAPSTMK	3	1	1548.81	774.91	0.25	51	28.28		0.00165393	6		2	1.1091e+07	2	R.MQKEITALAPSTMK.I	[313-326]	Not Used	Not Used
	P60709; P62736	Actin, cytoplasmic 1 OS=Homo sapiens OX=9606 GN=ACTB PE=1 SV=1 Actin, aortic smooth muscle OS=Homo sapiens OX=9606 GN=ACTA2 PE=1 SV=1	MQKEITALAPSTMK	2	1	1564.81	782.907	-0.9	53		1xOxidation [M1]	0.00165393	6		2			R.MQKEITALAPSTMK.I	[313-326]	Not Used	Not Used
	P60709	Actin, cytoplasmic 1 OS=Homo sapiens OX=9606 GN=ACTB PE=1 SV=1	MTQIMFETFNTPAMYVAIQAVLSLYASGR	3	0	3253.61	1085.21	-1.44	25	66.51		0.00165393	2		1	128094	1	K.MTQIMFETFNTPAMYVAIQAVLSLYASGR.T	[119-147]	Used	Used
	P60709	Actin, cytoplasmic 1 OS=Homo sapiens OX=9606 GN=ACTB PE=1 SV=1	MTQIMFETFNTPAMYVAIQAVLSLYASGR	2	0	3269.6	1090.54	1.26	25		1xOxidation [M]	0.00165393	2		1			K.MTQIMFETFNTPAMYVAIQAVLSLYASGR.T	[119-147]	Not Used	Not Used
	P60709	Actin, cytoplasmic 1 OS=Homo sapiens OX=9606 GN=ACTB PE=1 SV=1	MTQIMFETFNTPAMYVAIQAVLSLYASGR	2	0	3301.59	1101.2	-0.09	22	63.09	3xOxidation [M1; M5; M14]	0.00165393	2		1	98351.6	1	K.MTQIMFETFNTPAMYVAIQAVLSLYASGR.T	[119-147]	Used	Used
	P60709; P62736	Actin, cytoplasmic 1 OS=Homo sapiens OX=9606 GN=ACTB PE=1 SV=1 Actin, aortic smooth muscle OS=Homo sapiens OX=9606 GN=ACTA2 PE=1 SV=1	YSVWIGGSILASLSTFQQMWISK	3	0	2602.34	868.117	0.11	43	66.27		0.00165393	5		2	124609	1	K.YSVWIGGSILASLSTFQQMWISK.Q	[337-359]	Not Used	Not Used
	P60709; P62736	Actin, cytoplasmic 1 OS=Homo sapiens OX=9606 GN=ACTB PE=1 SV=1 Actin, aortic smooth muscle OS=Homo sapiens OX=9606 GN=ACTA2 PE=1 SV=1	SYELPDGQVITIGNER	3	0	1790.89	895.95	0.26	70	42.45		0.00165393	10		2	6720425	1	K.SYELPDGQVITIGNER.F	[239-254]	Not Used	Not Used
	P60709	Actin, cytoplasmic 1 OS=Homo sapiens OX=9606 GN=ACTB PE=1 SV=1	TTGIVMDSGDGVTHTVPIYEGYALPHAILR	5	0	3183.61	1061.88	0.39	87	47.89		0.00165393	2		1	1.11907e+07	2	R.TTGIVMDSGDGVTHTVPIYEGYALPHAILR.L	[148-177]	Used	Used
	P60709	Actin, cytoplasmic 1 OS=Homo sapiens OX=9606 GN=ACTB PE=1 SV=1	TTGIVMDSGDGVTHTVPIYEGYALPHAILR	3	0	3199.61	1067.21	0.75	51	45.75	1xOxidation [M6]	0.00165393	2		1	3.82865e+06	2	R.TTGIVMDSGDGVTHTVPIYEGYALPHAILR.L	[148-177]	Used	Used
	P60709	Actin, cytoplasmic 1 OS=Homo sapiens OX=9606 GN=ACTB PE=1 SV=1	VAPEEHPVLLTEAPLNPK	2	0	1954.06	977.536	-0.25	35	35.84		0.00165393	2		1	11285524	1	R.VAPEEHPVLLTEAPLNPK.A	[96-113]	Used	Used
	P60709; P62736	Actin, cytoplasmic 1 OS=Homo sapiens OX=9606 GN=ACTB PE=1 SV=1 Actin, aortic smooth muscle OS=Homo sapiens OX=9606 GN=ACTA2 PE=1 SV=1	EITALAPSTMK	2	0	1177.61	589.309	-1.41	28	23.18	1xOxidation [M10]	0.00165393	6		2	1.04969e+06	1	K.EITALAPSTMK.I	[316-326]	Not Used	Not Used
	P60709	Actin, cytoplasmic 1 OS=Homo sapiens OX=9606 GN=ACTB PE=1 SV=1	DLYANTVLSGGTTMYPGIADR	3	0	2215.07	1108.04	-0.72	68	45.27		0.00165393	2		1	873875	1	K.DLYANTVLSGGTTMYPGIADR.M	[292-312]	Used	Used
	P60709; P62736	Actin, cytoplasmic 1 OS=Homo sapiens OX=9606 GN=ACTB PE=1 SV=1 Actin, aortic smooth muscle OS=Homo sapiens OX=9606 GN=ACTA2 PE=1 SV=1	AVFPSIVGRPR	9	0	1198.71	599.856	-0.63	36	32.37		0.00165393	9		2	111792125	2	R.AVFPSIVGRPR.H	[29-39]	Not Used	Not Used
	P60709	Actin, cytoplasmic 1 OS=Homo sapiens OX=9606 GN=ACTB PE=1 SV=1	EKLCYVALDFEQEMATAASSSSLEK	2	1	2807.31	936.442	-0.06	33	55.27	1xCarbamidomethyl [C4]	0.00165393	3		1	133010	1	K.EKLCYVALDFEQEMATAASSSSLEK.S	[214-238]	Used	Used
	P60709; P62736	Actin, cytoplasmic 1 OS=Homo sapiens OX=9606 GN=ACTB PE=1 SV=1 Actin, aortic smooth muscle OS=Homo sapiens OX=9606 GN=ACTA2 PE=1 SV=1	EITALAPSTMK	2	0	1161.62	581.313	0.6	44	28.56		0.00165393	6		2	10616068	1	K.EITALAPSTMK.I	[316-326]	Not Used	Not Used
	P60709; P62736	Actin, cytoplasmic 1 OS=Homo sapiens OX=9606 GN=ACTB PE=1 SV=1 Actin, aortic smooth muscle OS=Homo sapiens OX=9606 GN=ACTA2 PE=1 SV=1	DSYVGDEAQSK	2	0	1198.52	599.764	-1.51	61	17.02		0.00165393	6		2	14534300	1	K.DSYVGDEAQSK.R	[51-61]	Not Used	Not Used
	P60709; P62736	Actin, cytoplasmic 1 OS=Homo sapiens OX=9606 GN=ACTB PE=1 SV=1 Actin, aortic smooth muscle OS=Homo sapiens OX=9606 GN=ACTA2 PE=1 SV=1	DSYVGDEAQSKR	10	1	1354.62	677.815	-0.19	59	16.55		0.00165393	6		2	79427888	1	K.DSYVGDEAQSKR.G	[51-62]	Not Used	Not Used
	P60709	Actin, cytoplasmic 1 OS=Homo sapiens OX=9606 GN=ACTB PE=1 SV=1	KDLYANTVLSGGTTMYPGIADR	4	1	2343.16	1172.08	-1.2	57	40.49		0.00165393	2		1	1.81313e+06	2	R.KDLYANTVLSGGTTMYPGIADR.M	[291-312]	Used	Used
	P60709	Actin, cytoplasmic 1 OS=Homo sapiens OX=9606 GN=ACTB PE=1 SV=1	KDLYANTVLSGGTTMYPGIADR	1	1	2359.16	787.059	1.39	46	36.62	1xOxidation [M15]	0.00165393	2		1	242210	1	R.KDLYANTVLSGGTTMYPGIADR.M	[291-312]	Used	Used
	P60709; P62736	Actin, cytoplasmic 1 OS=Homo sapiens OX=9606 GN=ACTB PE=1 SV=1 Actin, aortic smooth muscle OS=Homo sapiens OX=9606 GN=ACTA2 PE=1 SV=1	HQGVMVGMGQK	3	0	1171.57	586.289	-0.84	38	20.49		0.00165393	7		2	12163170	1	R.HQGVMVGMGQK.D	[40-50]	Not Used	Not Used
	P60709; P62736	Actin, cytoplasmic 1 OS=Homo sapiens OX=9606 GN=ACTB PE=1 SV=1 Actin, aortic smooth muscle OS=Homo sapiens OX=9606 GN=ACTA2 PE=1 SV=1	HQGVMVGMGQK	4	0	1187.57	594.286	-0.72	31	17.51	1xOxidation [M]	0.00165393	7		2	2344643	1	R.HQGVMVGMGQK.D	[40-50]	Not Used	Not Used
	P60709; P62736	Actin, cytoplasmic 1 OS=Homo sapiens OX=9606 GN=ACTB PE=1 SV=1 Actin, aortic smooth muscle OS=Homo sapiens OX=9606 GN=ACTA2 PE=1 SV=1	AGFAGDDAPR	7	0	976.448	488.728	-0.1	79	18.99		0.00165393	10		2	5.35456e+07	2	K.AGFAGDDAPR.A	[19-28]	Not Used	Not Used
	P60709	Actin, cytoplasmic 1 OS=Homo sapiens OX=9606 GN=ACTB PE=1 SV=1	LCYVALDFEQEMATAASSSSLEK	4	0	2550.17	1275.59	-0.04	115	55.77	1xCarbamidomethyl [C2]	0.00165393	3		1	299535	1	K.LCYVALDFEQEMATAASSSSLEK.S	[216-238]	Used	Used
	P60709	Actin, cytoplasmic 1 OS=Homo sapiens OX=9606 GN=ACTB PE=1 SV=1	GYSFTTTAER	2	0	1132.53	566.767	0.34	34	24.26		0.00165393	2		1	11987258	1	R.GYSFTTTAER.E	[197-206]	Used	Used
	P60709; P62736	Actin, cytoplasmic 1 OS=Homo sapiens OX=9606 GN=ACTB PE=1 SV=1 Actin, aortic smooth muscle OS=Homo sapiens OX=9606 GN=ACTA2 PE=1 SV=1	LDLAGRDLTDYLMK	4	1	1639.84	820.422	0.22	32	41.78	1xOxidation [M13]	0.00165393	7		2	2.04887e+06	2	R.LDLAGRDLTDYLMK.I	[178-191]	Not Used	Not Used
	P60709; P62736	Actin, cytoplasmic 1 OS=Homo sapiens OX=9606 GN=ACTB PE=1 SV=1 Actin, aortic smooth muscle OS=Homo sapiens OX=9606 GN=ACTA2 PE=1 SV=1	LDLAGRDLTDYLMK	4	1	1623.84	541.952	-0.06	31	46.44		0.00165393	7		2	9711019	2	R.LDLAGRDLTDYLMK.I	[178-191]	Not Used	Not Used
	P60709	Actin, cytoplasmic 1 OS=Homo sapiens OX=9606 GN=ACTB PE=1 SV=1	GYSFTTTAEREIVR	3	1	1629.82	815.415	-0.21	33	34.35		0.0024483	2		1	3.7344e+06	2	R.GYSFTTTAEREIVR.D	[197-210]	Used	Used
	P60709	Actin, cytoplasmic 1 OS=Homo sapiens OX=9606 GN=ACTB PE=1 SV=1	QEYDESGPSIVHR	4	0	1516.7	758.856	0.82	46	21.3		0.0024483	7		1	3.26697e+06	2	K.QEYDESGPSIVHR.K	[360-372]	Used	Used
	P60709; P62736	Actin, cytoplasmic 1 OS=Homo sapiens OX=9606 GN=ACTB PE=1 SV=1 Actin, aortic smooth muscle OS=Homo sapiens OX=9606 GN=ACTA2 PE=1 SV=1	HQGVMVGMGQK	2	0	1203.56	602.284	0.6	25	15.6	2xOxidation [M5; M8]	0.0024483	7		2	1.36817e+06	1	R.HQGVMVGMGQK.D	[40-50]	Not Used	Not Used
	P60709; P62736	Actin, cytoplasmic 1 OS=Homo sapiens OX=9606 GN=ACTB PE=1 SV=1 Actin, aortic smooth muscle OS=Homo sapiens OX=9606 GN=ACTA2 PE=1 SV=1	DLTDYLMK	2	0	998.486	499.747	0.7	30	40.44		0.00411958	7		2	5.59803e+06	1	R.DLTDYLMK.I	[184-191]	Not Used	Not Used
	P60709; P62736	Actin, cytoplasmic 1 OS=Homo sapiens OX=9606 GN=ACTB PE=1 SV=1 Actin, aortic smooth muscle OS=Homo sapiens OX=9606 GN=ACTA2 PE=1 SV=1	IIAPPERK	2	1	923.567	462.287	0.24	27	17.15		0.00456775	7		2	22800998	1	K.IIAPPERK.Y	[329-336]	Not Used	Not Used
	P60709; P62736	Actin, cytoplasmic 1 OS=Homo sapiens OX=9606 GN=ACTB PE=1 SV=1 Actin, aortic smooth muscle OS=Homo sapiens OX=9606 GN=ACTA2 PE=1 SV=1	IKIIAPPERK	2	2	1164.75	582.877	0.21	24	22.86		0.00456775	7		2	2.15101e+06	1	K.IKIIAPPERK.Y	[327-336]	Not Used	Not Used
	P60709	Actin, cytoplasmic 1 OS=Homo sapiens OX=9606 GN=ACTB PE=1 SV=1	CDVDIRK	2	1	905.451	453.229	0.16	19	16.46	1xCarbamidomethyl [C1]	0.00456775	3		1	11279649	1	K.CDVDIRK.D	[285-291]	Used	Used
	P60709; P62736	Actin, cytoplasmic 1 OS=Homo sapiens OX=9606 GN=ACTB PE=1 SV=1 Actin, aortic smooth muscle OS=Homo sapiens OX=9606 GN=ACTA2 PE=1 SV=1	DLTDYLMK	1	0	1014.48	507.744	0.22	18	33.52	1xOxidation [M7]	0.00839836	7		2	2.90647e+06	1	R.DLTDYLMK.I	[184-191]	Not Used	Not Used
P46976	Glycogenin-1 OS=Homo sapiens OX=9606 GN=GYG1 PE=1 SV=4	21	350	39.4	5.53	0	888	1	10	10	43	5.81996e+07	11	0.0121917
	Master Protein Accessions	Master Protein Descriptions	Sequence	# PSMs	# Missed Cleavages	Theo. MH+ [Da]	m/z [Da] (by Search Engine): Mascot	DeltaM [ppm] (by Search Engine): Mascot	Ions Score (by Search Engine): Mascot	Top Apex RT [min]	Modifications	Qvality q-value	# Proteins		# Protein Groups	Abundance: F1764: n/a, Sample, n/a, n/a	Abundances Count: F1764: n/a, Sample, n/a, n/a	Sequence in Protein	Positions in Proteins	Quan Usage	Quan Ratio Usage
	P46976	Glycogenin-1 OS=Homo sapiens OX=9606 GN=GYG1 PE=1 SV=4	RLVVLATPQVSDSMR	4	1	1671.92	836.464	-0.66	42	34.61		0.00165393	1		1	1.63508e+06	2	R.RLVVLATPQVSDSMR.K	[34-48]	Used	Used
	P46976	Glycogenin-1 OS=Homo sapiens OX=9606 GN=GYG1 PE=1 SV=4	LVVLATPQVSDSMRK	2	1	1643.91	822.462	1.04	35	32.71		0.00165393	1		1	859947	1	R.LVVLATPQVSDSMRK.V	[35-49]	Used	Used
	P46976	Glycogenin-1 OS=Homo sapiens OX=9606 GN=GYG1 PE=1 SV=4	WEQGQADYMGADSFDNIK	2	0	2074.88	1037.94	0.38	50	38.99		0.00165393	1		1	526782	1	R.WEQGQADYMGADSFDNIK.R	[325-342]	Used	Used
	P46976	Glycogenin-1 OS=Homo sapiens OX=9606 GN=GYG1 PE=1 SV=4	WEQGQADYMGADSFDNIKR	6	1	2230.98	1115.99	-0.66	72	35.02		0.00165393	1		1	2.18418e+07	2	R.WEQGQADYMGADSFDNIKR.K	[325-343]	Used	Used
	P46976	Glycogenin-1 OS=Homo sapiens OX=9606 GN=GYG1 PE=1 SV=4	WEQGQADYMGADSFDNIKR	2	1	2246.98	749.663	-0.59	40	29.82	1xOxidation [M9]	0.00165393	1		1	2.32189e+06	1	R.WEQGQADYMGADSFDNIKR.K	[325-343]	Used	Used
	P46976	Glycogenin-1 OS=Homo sapiens OX=9606 GN=GYG1 PE=1 SV=4	ERWEQGQADYMGADSFDNIK	2	1	2360.02	787.347	0.62	39	36.84		0.00165393	1		1	616188	1	K.ERWEQGQADYMGADSFDNIK.R	[323-342]	Used	Used
	P46976	Glycogenin-1 OS=Homo sapiens OX=9606 GN=GYG1 PE=1 SV=4	ERWEQGQADYMGADSFDNIKR	18	2	2516.13	839.379	-1.48	35	34.18		0.00165393	1		1	9.39841e+06	7	K.ERWEQGQADYMGADSFDNIKR.K	[323-343]	Used	Used
	P46976	Glycogenin-1 OS=Homo sapiens OX=9606 GN=GYG1 PE=1 SV=4	GALVLGSSLK	2	0	944.578	472.792	0.09	36	31.8		0.0024483	1		1	1.50956e+06	1	K.GALVLGSSLK.Q	[18-27]	Used	Used
	P46976	Glycogenin-1 OS=Homo sapiens OX=9606 GN=GYG1 PE=1 SV=4	KLDTYLQ	2	1	880.477	440.742	-0.49	49	25.64		0.0024483	1		1	13061338	1	R.KLDTYLQ.-	[344-350]	Used	Used
	P46976	Glycogenin-1 OS=Homo sapiens OX=9606 GN=GYG1 PE=1 SV=4	LHCWSLTQYSK	2	0	1422.68	711.845	0.04	16	31.61	1xCarbamidomethyl [C3]	0.00411958	1		1	668823	1	K.LHCWSLTQYSK.C	[87-97]	Used	Used
	P46976	Glycogenin-1 OS=Homo sapiens OX=9606 GN=GYG1 PE=1 SV=4	RPELGVTLTK	1	0	1113.66	557.335	-0.11	45	25.62		0.00456775	1		1	5759775	1	K.RPELGVTLTK.L	[77-86]	Used	Used
P62937	Peptidyl-prolyl cis-trans isomerase A OS=Homo sapiens OX=9606 GN=PPIA PE=1 SV=2	65	165	18	7.81	0	566	1	10	10	25	54942530	10	0.00708818
	Master Protein Accessions	Master Protein Descriptions	Sequence	# PSMs	# Missed Cleavages	Theo. MH+ [Da]	m/z [Da] (by Search Engine): Mascot	DeltaM [ppm] (by Search Engine): Mascot	Ions Score (by Search Engine): Mascot	Top Apex RT [min]	Modifications	Qvality q-value	# Proteins		# Protein Groups	Abundance: F1764: n/a, Sample, n/a, n/a	Abundances Count: F1764: n/a, Sample, n/a, n/a	Sequence in Protein	Positions in Proteins	Quan Usage	Quan Ratio Usage
	P62937	Peptidyl-prolyl cis-trans isomerase A OS=Homo sapiens OX=9606 GN=PPIA PE=1 SV=2	IIPGFMCQGGDFTR	2	0	1598.75	799.877	0.23	24	41.75	1xCarbamidomethyl [C7]	0.00165393	2		1	1.71848e+06	1	R.IIPGFMCQGGDFTR.H	[56-69]	Used	Used
	P62937	Peptidyl-prolyl cis-trans isomerase A OS=Homo sapiens OX=9606 GN=PPIA PE=1 SV=2	VNPTVFFDIAVDGEPLGR	2	0	1946	973.504	-1.02	50			0.00165393	1		1			M.VNPTVFFDIAVDGEPLGR.V	[2-19]	Not Used	Not Used
	P62937	Peptidyl-prolyl cis-trans isomerase A OS=Homo sapiens OX=9606 GN=PPIA PE=1 SV=2	VKEGMNIVEAMER	1	1	1521.74	761.374	0.28	39	29.72	1xOxidation [M5]	0.00165393	1		1	490546	1	K.VKEGMNIVEAMER.F	[132-144]	Used	Used
	P62937	Peptidyl-prolyl cis-trans isomerase A OS=Homo sapiens OX=9606 GN=PPIA PE=1 SV=2	VKEGMNIVEAMER	5	1	1505.75	753.376	-0.23	65	36.39		0.00165393	1		1	17870463	2	K.VKEGMNIVEAMER.F	[132-144]	Used	Used
	P62937	Peptidyl-prolyl cis-trans isomerase A OS=Homo sapiens OX=9606 GN=PPIA PE=1 SV=2	VSFELFADKVPK	2	1	1379.76	690.382	-0.05	53	43.06		0.00165393	1		1	10188542	1	R.VSFELFADKVPK.T	[20-31]	Used	Used
	P62937	Peptidyl-prolyl cis-trans isomerase A OS=Homo sapiens OX=9606 GN=PPIA PE=1 SV=2	SIYGEKFEDENFILK	3	1	1831.91	916.459	0.23	56	41.92		0.00165393	1		1	1.47701e+07	2	K.SIYGEKFEDENFILK.H	[77-91]	Used	Used
	P62937	Peptidyl-prolyl cis-trans isomerase A OS=Homo sapiens OX=9606 GN=PPIA PE=1 SV=2	TEWLDGKHVVFGK	3	1	1515.8	505.937	0.29	17	35.17		0.00165393	1		1	2.75333e+06	3	K.TEWLDGKHVVFGK.V	[119-131]	Used	Used
	P62937	Peptidyl-prolyl cis-trans isomerase A OS=Homo sapiens OX=9606 GN=PPIA PE=1 SV=2	EGMNIVEAMER	2	0	1278.58	639.795	0.67	44	40.85		0.00165393	1		1	819108	1	K.EGMNIVEAMER.F	[134-144]	Used	Used
	P62937	Peptidyl-prolyl cis-trans isomerase A OS=Homo sapiens OX=9606 GN=PPIA PE=1 SV=2	KITIADCGQLE	2	1	1247.63	624.319	0.43	54	28.29	1xCarbamidomethyl [C7]	0.00165393	1		1	4138919	1	K.KITIADCGQLE.-	[155-165]	Used	Used
	P62937	Peptidyl-prolyl cis-trans isomerase A OS=Homo sapiens OX=9606 GN=PPIA PE=1 SV=2	ALSTGEKGFGYK	2	1	1257.65	629.327	0.19	34	22.23		0.0024483	1		1	1.92473e+06	1	R.ALSTGEKGFGYK.G	[38-49]	Used	Used
	P62937	Peptidyl-prolyl cis-trans isomerase A OS=Homo sapiens OX=9606 GN=PPIA PE=1 SV=2	FEDENFILK	1	0	1154.57	577.79	-0.52	34	38.53		0.00411958	1		1	268293	1	K.FEDENFILK.H	[83-91]	Used	Used
P49913	Cathelicidin antimicrobial peptide OS=Homo sapiens OX=9606 GN=CAMP PE=1 SV=1	29	170	19.3	9.41	0	280	1	6	6	17	5.14014e+07	6	0.00481996
	Master Protein Accessions	Master Protein Descriptions	Sequence	# PSMs	# Missed Cleavages	Theo. MH+ [Da]	m/z [Da] (by Search Engine): Mascot	DeltaM [ppm] (by Search Engine): Mascot	Ions Score (by Search Engine): Mascot	Top Apex RT [min]	Modifications	Qvality q-value	# Proteins		# Protein Groups	Abundance: F1764: n/a, Sample, n/a, n/a	Abundances Count: F1764: n/a, Sample, n/a, n/a	Sequence in Protein	Positions in Proteins	Quan Usage	Quan Ratio Usage
	P49913	Cathelicidin antimicrobial peptide OS=Homo sapiens OX=9606 GN=CAMP PE=1 SV=1	TTQQSPEDCDFKK	4	1	1583.7	528.572	0.65	23	16.93	1xCarbamidomethyl [C9]	0.00165393	1		1	30119761	2	R.TTQQSPEDCDFKK.D	[89-101]	Used	Used
	P49913	Cathelicidin antimicrobial peptide OS=Homo sapiens OX=9606 GN=CAMP PE=1 SV=1	TTQQSPEDCDFKKDGLVK	4	2	2096	1048.5	-0.11	53	22.69	1xCarbamidomethyl [C9]	0.00165393	1		1	3.36981e+06	2	R.TTQQSPEDCDFKKDGLVK.R	[89-106]	Used	Used
	P49913	Cathelicidin antimicrobial peptide OS=Homo sapiens OX=9606 GN=CAMP PE=1 SV=1	CMGTVTLNQAR	2	0	1250.6	625.802	-0.45	62	23.68	1xCarbamidomethyl [C1]	0.00165393	1		1	2.14724e+06	1	R.CMGTVTLNQAR.G	[108-118]	Used	Used
	P49913	Cathelicidin antimicrobial peptide OS=Homo sapiens OX=9606 GN=CAMP PE=1 SV=1	GSFDISCDKDNK	2	1	1385.6	693.304	-0.19	32	20.3	1xCarbamidomethyl [C7]	0.00165393	1		1	1.13664e+06	1	R.GSFDISCDKDNK.R	[119-130]	Used	Used
	P49913	Cathelicidin antimicrobial peptide OS=Homo sapiens OX=9606 GN=CAMP PE=1 SV=1	AIDGINQR	2	0	886.474	443.741	0.47	34	18.58		0.0024483	1		1	13948352	1	R.AIDGINQR.S	[42-49]	Used	Used
	P49913	Cathelicidin antimicrobial peptide OS=Homo sapiens OX=9606 GN=CAMP PE=1 SV=1	GSFDISCDKDNKR	3	2	1541.7	771.354	-0.51	33	20.1	1xCarbamidomethyl [C7]	0.00456775	1		1	679606	2	R.GSFDISCDKDNKR.F	[119-131]	Used	Used
P04075	Fructose-bisphosphate aldolase A OS=Homo sapiens OX=9606 GN=ALDOA PE=1 SV=2	26	364	39.4	8.09	0	485	1	9	9	23	4.54301e+07	9	0.00652112
	Master Protein Accessions	Master Protein Descriptions	Sequence	# PSMs	# Missed Cleavages	Theo. MH+ [Da]	m/z [Da] (by Search Engine): Mascot	DeltaM [ppm] (by Search Engine): Mascot	Ions Score (by Search Engine): Mascot	Top Apex RT [min]	Modifications	Qvality q-value	# Proteins		# Protein Groups	Abundance: F1764: n/a, Sample, n/a, n/a	Abundances Count: F1764: n/a, Sample, n/a, n/a	Sequence in Protein	Positions in Proteins	Quan Usage	Quan Ratio Usage
	P04075	Fructose-bisphosphate aldolase A OS=Homo sapiens OX=9606 GN=ALDOA PE=1 SV=2	PYQYPALTPEQKK	5	1	1562.82	521.612	0.88	17	25.61		0.00165393	1		1	13341086	2	M.PYQYPALTPEQKK.E	[2-14]	Used	Used
	P04075	Fructose-bisphosphate aldolase A OS=Homo sapiens OX=9606 GN=ALDOA PE=1 SV=2	IGEHTPSALAIMENANVLAR	4	0	2107.1	1054.05	-0.34	76	48.62		0.00165393	1		1	2.40246e+06	2	K.IGEHTPSALAIMENANVLAR.Y	[154-173]	Used	Used
	P04075	Fructose-bisphosphate aldolase A OS=Homo sapiens OX=9606 GN=ALDOA PE=1 SV=2	IVAPGKGILAADESTGSIAK	2	1	1898.06	949.533	-0.07	45	31.64		0.00165393	1		1	1.03695e+06	2	R.IVAPGKGILAADESTGSIAK.R	[23-42]	Used	Used
	P04075	Fructose-bisphosphate aldolase A OS=Homo sapiens OX=9606 GN=ALDOA PE=1 SV=2	GILAADESTGSIAKR	2	1	1488.8	744.904	-0.02	92	24.4		0.00165393	1		1	3277339	1	K.GILAADESTGSIAKR.L	[29-43]	Used	Used
	P04075	Fructose-bisphosphate aldolase A OS=Homo sapiens OX=9606 GN=ALDOA PE=1 SV=2	AAQEEYVKR	2	1	1093.56	547.285	-0.07	53	15.94		0.00165393	1		1	5.91819e+06	1	K.AAQEEYVKR.A	[323-331]	Used	Used
	P04075	Fructose-bisphosphate aldolase A OS=Homo sapiens OX=9606 GN=ALDOA PE=1 SV=2	IVAPGKGILAADESTGSIAKR	2	2	2054.16	685.391	-0.39	19	29.38		0.0024483	1		1	710310	1	R.IVAPGKGILAADESTGSIAKR.L	[23-43]	Used	Used
	P04075	Fructose-bisphosphate aldolase A OS=Homo sapiens OX=9606 GN=ALDOA PE=1 SV=2	ALANSLACQGK	2	0	1132.58	566.793	1.13	29	20.68	1xCarbamidomethyl [C8]	0.00411958	1		1	2.42165e+06	1	R.ALANSLACQGK.Y	[332-342]	Used	Used
	P04075	Fructose-bisphosphate aldolase A OS=Homo sapiens OX=9606 GN=ALDOA PE=1 SV=2	LQSIGTENTEENRR	2	1	1646.81	823.909	1.05	18	17.88		0.00411958	1		1	4.22797e+06	2	R.LQSIGTENTEENRR.F	[44-57]	Used	Used
	P04075	Fructose-bisphosphate aldolase A OS=Homo sapiens OX=9606 GN=ALDOA PE=1 SV=2	ELSDIAHR	2	0	940.485	470.746	-0.52	44	18.59		0.00456775	1		1	12094138	1	K.ELSDIAHR.I	[15-22]	Used	Used
P10153	Non-secretory ribonuclease OS=Homo sapiens OX=9606 GN=RNASE2 PE=1 SV=2	23	161	18.3	8.73	0	380	1	6	6	30	4.19447e+07	7	0.00850581
	Master Protein Accessions	Master Protein Descriptions	Sequence	# PSMs	# Missed Cleavages	Theo. MH+ [Da]	m/z [Da] (by Search Engine): Mascot	DeltaM [ppm] (by Search Engine): Mascot	Ions Score (by Search Engine): Mascot	Top Apex RT [min]	Modifications	Qvality q-value	# Proteins		# Protein Groups	Abundance: F1764: n/a, Sample, n/a, n/a	Abundances Count: F1764: n/a, Sample, n/a, n/a	Sequence in Protein	Positions in Proteins	Quan Usage	Quan Ratio Usage
	P10153	Non-secretory ribonuclease OS=Homo sapiens OX=9606 GN=RNASE2 PE=1 SV=2	RDPPQYPVVPVHLDR	19	1	1787.96	596.656	-0.11	32	31.63		0.00165393	1		1	2.49665e+07	6	R.RDPPQYPVVPVHLDR.I	[145-159]	Used	Used
	P10153	Non-secretory ribonuclease OS=Homo sapiens OX=9606 GN=RNASE2 PE=1 SV=2	RDPPQYPVVPVHLDRII	2	2	2014.12	672.046	0.68	17	45.48		0.00165393	1		1	978850	1	R.RDPPQYPVVPVHLDRII.-	[145-161]	Used	Used
	P10153	Non-secretory ribonuclease OS=Homo sapiens OX=9606 GN=RNASE2 PE=1 SV=2	YAQTPANMFYIVACDNR	2	0	2033.92	1017.46	-0.37	73	49.29	1xCarbamidomethyl [C14]	0.00165393	1		1	275864	1	R.YAQTPANMFYIVACDNR.D	[125-141]	Used	Used
	P10153	Non-secretory ribonuclease OS=Homo sapiens OX=9606 GN=RNASE2 PE=1 SV=2	YAQTPANMFYIVACDNRDQR	2	1	2433.11	811.707	-0.04	18	45.39	1xCarbamidomethyl [C14]	0.00165393	1		1	7573481	1	R.YAQTPANMFYIVACDNRDQR.R	[125-144]	Used	Used
	P10153	Non-secretory ribonuclease OS=Homo sapiens OX=9606 GN=RNASE2 PE=1 SV=2	DPPQYPVVPVHLDR	2	0	1631.85	816.431	0.3	30	34.93		0.00165393	1		1	6473856	1	R.DPPQYPVVPVHLDR.I	[146-159]	Used	Used
	P10153	Non-secretory ribonuclease OS=Homo sapiens OX=9606 GN=RNASE2 PE=1 SV=2	DPPQYPVVPVHLDRII	1	1	1858.02	620.013	0.75	21	48.87		0.00165393	1		1	199430	1	R.DPPQYPVVPVHLDRII.-	[146-161]	Used	Used
	P10153	Non-secretory ribonuclease OS=Homo sapiens OX=9606 GN=RNASE2 PE=1 SV=2	YAQTPANMFYIVACDNRDQR	2	1	2449.1	817.038	-0.95	1	35.37	1xCarbamidomethyl [C14]; 1xOxidation [M8]	0.00456775	1		1	1476717	1	R.YAQTPANMFYIVACDNRDQR.R	[125-144]	Used	Used
P07737	Profilin-1 OS=Homo sapiens OX=9606 GN=PFN1 PE=1 SV=2	58	140	15	8.27	0	628	1	10	10	22	3.91005e+07	10	0.0062376
	Master Protein Accessions	Master Protein Descriptions	Sequence	# PSMs	# Missed Cleavages	Theo. MH+ [Da]	m/z [Da] (by Search Engine): Mascot	DeltaM [ppm] (by Search Engine): Mascot	Ions Score (by Search Engine): Mascot	Top Apex RT [min]	Modifications	Qvality q-value	# Proteins		# Protein Groups	Abundance: F1764: n/a, Sample, n/a, n/a	Abundances Count: F1764: n/a, Sample, n/a, n/a	Sequence in Protein	Positions in Proteins	Quan Usage	Quan Ratio Usage
	P07737	Profilin-1 OS=Homo sapiens OX=9606 GN=PFN1 PE=1 SV=2	TDKTLVLLMGK	2	1	1218.71	609.86	0.11	53	37.57		0.00165393	1		1	15828019	1	K.TDKTLVLLMGK.E	[106-116]	Used	Used
	P07737	Profilin-1 OS=Homo sapiens OX=9606 GN=PFN1 PE=1 SV=2	STGGAPTFNVTVTKTDK	3	1	1723.89	862.447	0.36	58	26.25		0.00165393	1		1	1.5302e+06	2	K.STGGAPTFNVTVTKTDK.T	[92-108]	Used	Used
	P07737	Profilin-1 OS=Homo sapiens OX=9606 GN=PFN1 PE=1 SV=2	STGGAPTFNVTVTK	2	0	1379.72	690.361	-0.86	49			0.00165393	1		1			K.STGGAPTFNVTVTK.T	[92-105]	Not Used	Not Used
	P07737	Profilin-1 OS=Homo sapiens OX=9606 GN=PFN1 PE=1 SV=2	TFVNITPAEVGVLVGK	2	0	1643.94	822.472	-0.08	36	51.43		0.00165393	1		1	496563	1	K.TFVNITPAEVGVLVGK.D	[39-54]	Used	Used
	P07737	Profilin-1 OS=Homo sapiens OX=9606 GN=PFN1 PE=1 SV=2	TFVNITPAEVGVLVGKDR	4	1	1915.06	958.036	-0.46	66	47.96		0.00165393	1		1	8.20676e+06	2	K.TFVNITPAEVGVLVGKDR.S	[39-56]	Used	Used
	P07737	Profilin-1 OS=Homo sapiens OX=9606 GN=PFN1 PE=1 SV=2	TKSTGGAPTFNVTVTK	2	1	1608.86	804.933	-0.25	48	26.42		0.00165393	1		1	2.86731e+06	1	R.TKSTGGAPTFNVTVTK.T	[90-105]	Used	Used
	P07737	Profilin-1 OS=Homo sapiens OX=9606 GN=PFN1 PE=1 SV=2	DSLLQDGEFSMDLR	1	0	1625.75	813.377	0.06	61	47.97		0.00165393	1		1	729976	1	R.DSLLQDGEFSMDLR.T	[76-89]	Used	Used
	P07737	Profilin-1 OS=Homo sapiens OX=9606 GN=PFN1 PE=1 SV=2	DSLLQDGEFSMDLR	1	0	1641.74	821.375	-0.15	68	41.26	1xOxidation [M11]	0.00165393	1		1	264698	1	R.DSLLQDGEFSMDLR.T	[76-89]	Used	Used
	P07737	Profilin-1 OS=Homo sapiens OX=9606 GN=PFN1 PE=1 SV=2	EGVHGGLINK	2	0	1023.56	512.282	-1.19	45	18.53		0.00456775	1		1	6.58676e+06	1	K.EGVHGGLINK.K	[117-126]	Used	Used
	P07737	Profilin-1 OS=Homo sapiens OX=9606 GN=PFN1 PE=1 SV=2	DSPSVWAAVPGK	1	0	1213.62	607.314	0.08	34	33.29		0.00456775	1		1	1731275	1	K.DSPSVWAAVPGK.T	[27-38]	Used	Used
	P07737	Profilin-1 OS=Homo sapiens OX=9606 GN=PFN1 PE=1 SV=2	TLVLLMGK	2	0	874.543	437.775	-0.01	34	40.54		0.00456775	1		1	858948	1	K.TLVLLMGK.E	[109-116]	Used	Used
P60174	Triosephosphate isomerase OS=Homo sapiens OX=9606 GN=TPI1 PE=1 SV=4	71	249	26.7	6.9	0	735	1	13	13	25	3.28002e+07	12	0.00708818
	Master Protein Accessions	Master Protein Descriptions	Sequence	# PSMs	# Missed Cleavages	Theo. MH+ [Da]	m/z [Da] (by Search Engine): Mascot	DeltaM [ppm] (by Search Engine): Mascot	Ions Score (by Search Engine): Mascot	Top Apex RT [min]	Modifications	Qvality q-value	# Proteins		# Protein Groups	Abundance: F1764: n/a, Sample, n/a, n/a	Abundances Count: F1764: n/a, Sample, n/a, n/a	Sequence in Protein	Positions in Proteins	Quan Usage	Quan Ratio Usage
	P60174	Triosephosphate isomerase OS=Homo sapiens OX=9606 GN=TPI1 PE=1 SV=4	QSLGELIGTLNAAK	2	0	1414.79	707.898	-0.28	38	47.93		0.00165393	1		1	563589	1	K.QSLGELIGTLNAAK.V	[20-33]	Used	Used
	P60174	Triosephosphate isomerase OS=Homo sapiens OX=9606 GN=TPI1 PE=1 SV=4	VPADTEVVCAPPTAYIDFAR	2	0	2192.07	1096.54	-0.83	54	46.01	1xCarbamidomethyl [C9]	0.00165393	1		1	351350	1	K.VPADTEVVCAPPTAYIDFAR.Q	[34-53]	Used	Used
	P60174	Triosephosphate isomerase OS=Homo sapiens OX=9606 GN=TPI1 PE=1 SV=4	VIADNVKDWSK	2	1	1274.67	637.84	-0.71	31	25.27		0.00165393	1		1	5.91906e+06	1	K.VIADNVKDWSK.V	[150-160]	Used	Used
	P60174	Triosephosphate isomerase OS=Homo sapiens OX=9606 GN=TPI1 PE=1 SV=4	VVLAYEPVWAIGTGK	2	0	1602.89	801.949	0.68	63	49.73		0.00165393	1		1	493074	1	K.VVLAYEPVWAIGTGK.T	[161-175]	Used	Used
	P60174	Triosephosphate isomerase OS=Homo sapiens OX=9606 GN=TPI1 PE=1 SV=4	TATPQQAQEVHEK	3	0	1466.72	733.865	0.01	40	15.67		0.00165393	1		1	9.62301e+06	2	K.TATPQQAQEVHEK.L	[176-188]	Used	Used
	P60174	Triosephosphate isomerase OS=Homo sapiens OX=9606 GN=TPI1 PE=1 SV=4	SNVSDAVAQSTR	2	0	1234.6	617.805	-0.31	67	19.4		0.00165393	1		1	1.94419e+06	1	K.SNVSDAVAQSTR.I	[195-206]	Used	Used
	P60174	Triosephosphate isomerase OS=Homo sapiens OX=9606 GN=TPI1 PE=1 SV=4	IIYGGSVTGATCK	2	0	1326.67	663.84	-0.22	97	23.54	1xCarbamidomethyl [C12]	0.00165393	1		1	1.74562e+06	1	R.IIYGGSVTGATCK.E	[207-219]	Used	Used
	P60174	Triosephosphate isomerase OS=Homo sapiens OX=9606 GN=TPI1 PE=1 SV=4	DCGATWVVLGHSER	1	0	1586.74	793.873	0.33	29	34.42	1xCarbamidomethyl [C2]	0.00165393	1		1	540370	1	K.DCGATWVVLGHSER.R	[86-99]	Used	Used
	P60174	Triosephosphate isomerase OS=Homo sapiens OX=9606 GN=TPI1 PE=1 SV=4	ELASQPDVDGFLVGGASLKPEFVDIINAKQ	1	1	3157.64	1053.22	0.45	41			0.00165393	1		1			K.ELASQPDVDGFLVGGASLKPEFVDIINAKQ.-	[220-249]	Not Used	Not Used
	P60174	Triosephosphate isomerase OS=Homo sapiens OX=9606 GN=TPI1 PE=1 SV=4	HVFGESDELIGQK	2	0	1458.72	729.865	-0.15	25	28.42		0.00165393	1		1	6.50237e+06	1	R.HVFGESDELIGQK.V	[101-113]	Used	Used
	P60174	Triosephosphate isomerase OS=Homo sapiens OX=9606 GN=TPI1 PE=1 SV=4	KQSLGELIGTLNAAK	4	1	1542.88	771.946	0.28	79	41.53		0.00165393	1		1	1.76625e+06	2	R.KQSLGELIGTLNAAK.V	[19-33]	Used	Used
	P60174	Triosephosphate isomerase OS=Homo sapiens OX=9606 GN=TPI1 PE=1 SV=4	IAVAAQNCYK	1	0	1137.57	569.291	2.82	46	19.43	1xCarbamidomethyl [C8]	0.0024483	1		1	1.24206e+06	1	K.IAVAAQNCYK.V	[60-69]	Used	Used
	P60174	Triosephosphate isomerase OS=Homo sapiens OX=9606 GN=TPI1 PE=1 SV=4	LDEREAGITEK	1	1	1260.64	630.825	-0.06	28	18.15		0.00456775	1		1	2.10921e+06	1	K.LDEREAGITEK.V	[132-142]	Used	Used
P04839	Cytochrome b-245 heavy chain OS=Homo sapiens OX=9606 GN=CYBB PE=1 SV=2	11	570	65.3	8.63	0	327	1	5	5	15	3.0459e+07	5	0.00425291
	Master Protein Accessions	Master Protein Descriptions	Sequence	# PSMs	# Missed Cleavages	Theo. MH+ [Da]	m/z [Da] (by Search Engine): Mascot	DeltaM [ppm] (by Search Engine): Mascot	Ions Score (by Search Engine): Mascot	Top Apex RT [min]	Modifications	Qvality q-value	# Proteins		# Protein Groups	Abundance: F1764: n/a, Sample, n/a, n/a	Abundances Count: F1764: n/a, Sample, n/a, n/a	Sequence in Protein	Positions in Proteins	Quan Usage	Quan Ratio Usage
	P04839	Cytochrome b-245 heavy chain OS=Homo sapiens OX=9606 GN=CYBB PE=1 SV=2	QSISNSESGPR	2	0	1161.55	581.278	-0.03	71	15.86		0.00165393	1		1	1.56578e+06	1	K.QSISNSESGPR.G	[549-559]	Used	Used
	P04839	Cytochrome b-245 heavy chain OS=Homo sapiens OX=9606 GN=CYBB PE=1 SV=2	IGVFLCGPEALAETLSK	2	0	1804.95	902.98	0.31	52	56.87	1xCarbamidomethyl [C6]	0.00165393	1		1	413666	1	R.IGVFLCGPEALAETLSK.Q	[532-548]	Used	Used
	P04839	Cytochrome b-245 heavy chain OS=Homo sapiens OX=9606 GN=CYBB PE=1 SV=2	TIASQHPNTR	4	0	1124.58	562.794	0.05	53	15.24		0.00165393	1		1	15229181	1	K.TIASQHPNTR.I	[522-531]	Used	Used
	P04839	Cytochrome b-245 heavy chain OS=Homo sapiens OX=9606 GN=CYBB PE=1 SV=2	TLYGRPNWDNEFK	3	0	1639.79	547.267	0.55	15	33.99		0.00165393	1		1	5.25788e+06	2	K.TLYGRPNWDNEFK.T	[509-521]	Used	Used
	P04839	Cytochrome b-245 heavy chain OS=Homo sapiens OX=9606 GN=CYBB PE=1 SV=2	GVHFIFNKENF	4	1	1351.68	676.343	-0.45	41	41.14		0.00165393	1		1	7992448	2	R.GVHFIFNKENF.-	[560-570]	Used	Used
P80511	Protein S100-A12 OS=Homo sapiens OX=9606 GN=S100A12 PE=1 SV=2	32	92	10.6	6.25	0	274	1	4	4	21	2.70674e+07	4	0.00595407
	Master Protein Accessions	Master Protein Descriptions	Sequence	# PSMs	# Missed Cleavages	Theo. MH+ [Da]	m/z [Da] (by Search Engine): Mascot	DeltaM [ppm] (by Search Engine): Mascot	Ions Score (by Search Engine): Mascot	Top Apex RT [min]	Modifications	Qvality q-value	# Proteins		# Protein Groups	Abundance: F1764: n/a, Sample, n/a, n/a	Abundances Count: F1764: n/a, Sample, n/a, n/a	Sequence in Protein	Positions in Proteins	Quan Usage	Quan Ratio Usage
	P80511	Protein S100-A12 OS=Homo sapiens OX=9606 GN=S100A12 PE=1 SV=2	GHFDTLSKGELK	16	1	1331.7	666.351	-1.2	18	26.12		0.00165393	1		1	1.93976e+07	5	K.GHFDTLSKGELK.Q	[23-34]	Used	Used
	P80511	Protein S100-A12 OS=Homo sapiens OX=9606 GN=S100A12 PE=1 SV=2	ELANTIKNIKDK	1	2	1386.8	693.901	-0.45	46	22.37		0.0024483	1		1	832786	1	K.ELANTIKNIKDK.A	[40-51]	Used	Used
	P80511	Protein S100-A12 OS=Homo sapiens OX=9606 GN=S100A12 PE=1 SV=2	QLLTKELANTIK	2	1	1371.82	686.413	-1.48	10	34.81		0.00411958	1		1	506925	1	K.QLLTKELANTIK.N	[35-46]	Used	Used
	P80511	Protein S100-A12 OS=Homo sapiens OX=9606 GN=S100A12 PE=1 SV=2	GELKQLLTK	2	1	1029.63	515.319	-0.36	27	26.86		0.00456775	1		1	6330038	1	K.GELKQLLTK.E	[31-39]	Used	Used
P04040	Catalase OS=Homo sapiens OX=9606 GN=CAT PE=1 SV=3	28	527	59.7	7.39	0	614	1	12	12	28	2.5912e+07	11	0.00793876
	Master Protein Accessions	Master Protein Descriptions	Sequence	# PSMs	# Missed Cleavages	Theo. MH+ [Da]	m/z [Da] (by Search Engine): Mascot	DeltaM [ppm] (by Search Engine): Mascot	Ions Score (by Search Engine): Mascot	Top Apex RT [min]	Modifications	Qvality q-value	# Proteins		# Protein Groups	Abundance: F1764: n/a, Sample, n/a, n/a	Abundances Count: F1764: n/a, Sample, n/a, n/a	Sequence in Protein	Positions in Proteins	Quan Usage	Quan Ratio Usage
	P04040	Catalase OS=Homo sapiens OX=9606 GN=CAT PE=1 SV=3	LGPNYLHIPVNCPYR	4	0	1812.92	604.978	-0.41	20	39.07	1xCarbamidomethyl [C12]	0.00165393	1		1	3.28115e+06	2	R.LGPNYLHIPVNCPYR.A	[366-380]	Used	Used
	P04040	Catalase OS=Homo sapiens OX=9606 GN=CAT PE=1 SV=3	FNTANDDNVTQVR	1	0	1493.7	747.351	-2.74	79	22.02		0.00165393	1		1	260954	1	R.FNTANDDNVTQVR.A	[432-444]	Used	Used
	P04040	Catalase OS=Homo sapiens OX=9606 GN=CAT PE=1 SV=3	GAGAFGYFEVTHDITK	2	0	1712.83	856.917	-0.25	61	42.23		0.00165393	1		1	529931	1	K.GAGAFGYFEVTHDITK.Y	[78-93]	Used	Used
	P04040	Catalase OS=Homo sapiens OX=9606 GN=CAT PE=1 SV=3	AFYVNVLNEEQR	1	0	1481.74	741.373	0.28	73	39.32		0.00165393	1		1	266508	1	R.AFYVNVLNEEQR.K	[445-456]	Used	Used
	P04040	Catalase OS=Homo sapiens OX=9606 GN=CAT PE=1 SV=3	ADSRDPASDQMQHWK	4	1	1813.79	907.399	-0.54	29	24.5	1xAcetyl [N-Term]	0.00165393	1		1	3.11715e+06	2	M.ADSRDPASDQMQHWK.E	[2-16]	Used	Used
	P04040	Catalase OS=Homo sapiens OX=9606 GN=CAT PE=1 SV=3	ADSRDPASDQMQHWKEQR	2	2	2226.99	743.003	0.13	31	23.6	1xAcetyl [N-Term]	0.00165393	1		1	2.11747e+06	1	M.ADSRDPASDQMQHWKEQR.A	[2-19]	Used	Used
	P04040	Catalase OS=Homo sapiens OX=9606 GN=CAT PE=1 SV=3	ADVLTTGAGNPVGDKLNVITVGPR	2	1	2364.29	788.768	-0.06	48	40.92		0.00165393	1		1	1.58347e+06	1	K.ADVLTTGAGNPVGDKLNVITVGPR.G	[24-47]	Used	Used
	P04040	Catalase OS=Homo sapiens OX=9606 GN=CAT PE=1 SV=3	GPLLVQDVVFTDEMAHFDR	1	0	2189.07	730.362	0.34	26			0.00165393	1		1			R.GPLLVQDVVFTDEMAHFDR.E	[48-66]	Not Used	Not Used
	P04040	Catalase OS=Homo sapiens OX=9606 GN=CAT PE=1 SV=3	GPLLVQDVVFTDEMAHFDRER	4	1	2474.21	825.409	0.24	34	51.89		0.00165393	1		1	1.31532e+06	2	R.GPLLVQDVVFTDEMAHFDRER.I	[48-68]	Used	Used
	P04040	Catalase OS=Homo sapiens OX=9606 GN=CAT PE=1 SV=3	AAQKADVLTTGAGNPVGDKLNVITVGPR	4	2	2762.52	921.511	0.45	79	38.03		0.00165393	1		1	3.92326e+06	2	R.AAQKADVLTTGAGNPVGDKLNVITVGPR.G	[20-47]	Used	Used
	P04040	Catalase OS=Homo sapiens OX=9606 GN=CAT PE=1 SV=3	FSTVAGESGSADTVRDPR	1	1	1851.88	617.965	-0.9	20	21.54		0.0024483	1		1	1.00244e+06	1	R.FSTVAGESGSADTVRDPR.G	[113-130]	Used	Used
	P04040	Catalase OS=Homo sapiens OX=9606 GN=CAT PE=1 SV=3	LFAYPDTHR	2	0	1119.56	560.283	0.53	15	25.28		0.00456775	1		1	8514318	1	R.LFAYPDTHR.H	[355-363]	Used	Used
P60660	Myosin light polypeptide 6 OS=Homo sapiens OX=9606 GN=MYL6 PE=1 SV=2	68	151	16.9	4.65	0	506	1	9	9	17	2.49034e+07	8	0.00481996
	Master Protein Accessions	Master Protein Descriptions	Sequence	# PSMs	# Missed Cleavages	Theo. MH+ [Da]	m/z [Da] (by Search Engine): Mascot	DeltaM [ppm] (by Search Engine): Mascot	Ions Score (by Search Engine): Mascot	Top Apex RT [min]	Modifications	Qvality q-value	# Proteins		# Protein Groups	Abundance: F1764: n/a, Sample, n/a, n/a	Abundances Count: F1764: n/a, Sample, n/a, n/a	Sequence in Protein	Positions in Proteins	Quan Usage	Quan Ratio Usage
	P60660	Myosin light polypeptide 6 OS=Homo sapiens OX=9606 GN=MYL6 PE=1 SV=2	NKDQGTYEDYVEGLR	4	1	1786.82	596.28	0.61	46	32.75		0.00165393	1		1	5604969	2	K.NKDQGTYEDYVEGLR.V	[80-94]	Used	Used
	P60660	Myosin light polypeptide 6 OS=Homo sapiens OX=9606 GN=MYL6 PE=1 SV=2	ILYSQCGDVMR	2	0	1341.63	671.318	-0.76	50	27.36	1xCarbamidomethyl [C6]	0.00165393	2		1	2.17959e+06	1	K.ILYSQCGDVMR.A	[27-37]	Used	Used
	P60660	Myosin light polypeptide 6 OS=Homo sapiens OX=9606 GN=MYL6 PE=1 SV=2	VLGNPKSDEMNVK	2	1	1430.73	715.869	0.5	50	20.41		0.00165393	1		1	312619	1	K.VLGNPKSDEMNVK.V	[51-63]	Used	Used
	P60660	Myosin light polypeptide 6 OS=Homo sapiens OX=9606 GN=MYL6 PE=1 SV=2	ALGQNPTNAEVLK	2	0	1354.73	677.87	-0.12	44	25.16		0.00165393	2		1	3020441	1	R.ALGQNPTNAEVLK.V	[38-50]	Used	Used
	P60660	Myosin light polypeptide 6 OS=Homo sapiens OX=9606 GN=MYL6 PE=1 SV=2	CDFTEDQTAEFKEAFQLFDRTGDGK	1	2	2997.32	999.776	-2.44	37		1xAcetyl [N-Term]; 1xCarbamidomethyl [C1]	0.00165393	1		1			M.CDFTEDQTAEFKEAFQLFDRTGDGK.I	[2-26]	Not Used	Not Used
	P60660	Myosin light polypeptide 6 OS=Homo sapiens OX=9606 GN=MYL6 PE=1 SV=2	CDFTEDQTAEFKEAFQLFDR	1	1	2539.11	847.042	1.85	25	59.51	1xAcetyl [N-Term]; 1xCarbamidomethyl [C1]	0.00165393	1		1	136206	1	M.CDFTEDQTAEFKEAFQLFDR.T	[2-21]	Used	Used
	P60660	Myosin light polypeptide 6 OS=Homo sapiens OX=9606 GN=MYL6 PE=1 SV=2	EAFQLFDR	2	0	1025.51	513.256	0.54	53	40.58		0.00165393	1		1	896868	1	K.EAFQLFDR.T	[14-21]	Used	Used
	P60660	Myosin light polypeptide 6 OS=Homo sapiens OX=9606 GN=MYL6 PE=1 SV=2	HVLVTLGEK	2	0	995.588	498.298	-0.59	43	24.13		0.00165393	1		1	12376693	1	R.HVLVTLGEK.M	[111-119]	Used	Used
	P60660	Myosin light polypeptide 6 OS=Homo sapiens OX=9606 GN=MYL6 PE=1 SV=2	VFDKEGNGTVMGAEIR	1	1	1722.85	574.954	0.11	13	28.24		0.00456775	1		1	375996	1	R.VFDKEGNGTVMGAEIR.H	[95-110]	Used	Used
P08311	Cathepsin G OS=Homo sapiens OX=9606 GN=CTSG PE=1 SV=2	41	255	28.8	11.19	0	378	1	10	10	20	2.29182e+07	9	0.00567054
	Master Protein Accessions	Master Protein Descriptions	Sequence	# PSMs	# Missed Cleavages	Theo. MH+ [Da]	m/z [Da] (by Search Engine): Mascot	DeltaM [ppm] (by Search Engine): Mascot	Ions Score (by Search Engine): Mascot	Top Apex RT [min]	Modifications	Qvality q-value	# Proteins		# Protein Groups	Abundance: F1764: n/a, Sample, n/a, n/a	Abundances Count: F1764: n/a, Sample, n/a, n/a	Sequence in Protein	Positions in Proteins	Quan Usage	Quan Ratio Usage
	P08311	Cathepsin G OS=Homo sapiens OX=9606 GN=CTSG PE=1 SV=2	VSSFLPWIR	2	0	1104.62	552.814	0.14	41	53.4		0.00165393	1		1	2.73413e+06	1	R.VSSFLPWIR.T	[231-239]	Used	Used
	P08311	Cathepsin G OS=Homo sapiens OX=9606 GN=CTSG PE=1 SV=2	TIQNDIMLLQLSR	2	0	1544.85	772.927	0.56	85			0.00165393	1		1			R.TIQNDIMLLQLSR.R	[104-116]	Not Used	Not Used
	P08311	Cathepsin G OS=Homo sapiens OX=9606 GN=CTSG PE=1 SV=2	AQEGLRPGTLCTVAGWGR	1	0	1928.98	964.991	-0.44	28	37.15	1xCarbamidomethyl [C11]	0.00165393	1		1	1009904	1	R.AQEGLRPGTLCTVAGWGR.V	[132-149]	Used	Used
	P08311	Cathepsin G OS=Homo sapiens OX=9606 GN=CTSG PE=1 SV=2	GDSGGPLLCNNVAHGIVSYGK	4	0	2115.03	705.681	0.15	7	36.85	1xCarbamidomethyl [C9]	0.00165393	1		1	1.04873e+06	2	K.GDSGGPLLCNNVAHGIVSYGK.S	[199-219]	Used	Used
	P08311	Cathepsin G OS=Homo sapiens OX=9606 GN=CTSG PE=1 SV=2	AAFKGDSGGPLLCNNVAHGIVSYGK	3	1	2532.27	844.761	0.69	36	36.88	1xCarbamidomethyl [C13]	0.00165393	1		1	2.69644e+06	2	K.AAFKGDSGGPLLCNNVAHGIVSYGK.S	[195-219]	Used	Used
	P08311	Cathepsin G OS=Homo sapiens OX=9606 GN=CTSG PE=1 SV=2	IFGSYDPR	1	0	954.468	477.738	0.92	32	26.95		0.0024483	1		1	947320	1	R.IFGSYDPR.R	[175-182]	Used	Used
	P08311	Cathepsin G OS=Homo sapiens OX=9606 GN=CTSG PE=1 SV=2	ENTQQHITAR	1	0	1197.6	599.303	0.76	43	15.46		0.00411958	1		1	5321099	1	R.ENTQQHITAR.R	[83-92]	Used	Used
	P08311	Cathepsin G OS=Homo sapiens OX=9606 GN=CTSG PE=1 SV=2	NRNVNPVALPR	2	1	1249.71	625.36	-0.42	27	23.36		0.00411958	1		1	650037	1	R.NRNVNPVALPR.A	[121-131]	Used	Used
	P08311	Cathepsin G OS=Homo sapiens OX=9606 GN=CTSG PE=1 SV=2	NVNPVALPR	2	0	979.568	490.287	-1.02	20	26.29		0.00608856	1		1	3113892	1	R.NVNPVALPR.A	[123-131]	Used	Used
	P08311	Cathepsin G OS=Homo sapiens OX=9606 GN=CTSG PE=1 SV=2	SSGVPPEVFTR	2	0	1175.61	588.306	-0.62	9	28.18		0.00689139	1		1	5.3967e+06	1	K.SSGVPPEVFTR.V	[220-230]	Used	Used
P04083	Annexin A1 OS=Homo sapiens OX=9606 GN=ANXA1 PE=1 SV=2	55	346	38.7	7.02	0	941	1	15	15	32	2.21469e+07	10	0.00907287
	Master Protein Accessions	Master Protein Descriptions	Sequence	# PSMs	# Missed Cleavages	Theo. MH+ [Da]	m/z [Da] (by Search Engine): Mascot	DeltaM [ppm] (by Search Engine): Mascot	Ions Score (by Search Engine): Mascot	Top Apex RT [min]	Modifications	Qvality q-value	# Proteins		# Protein Groups	Abundance: F1764: n/a, Sample, n/a, n/a	Abundances Count: F1764: n/a, Sample, n/a, n/a	Sequence in Protein	Positions in Proteins	Quan Usage	Quan Ratio Usage
	P04083	Annexin A1 OS=Homo sapiens OX=9606 GN=ANXA1 PE=1 SV=2	MYGISLCQAILDETKGDYEK	1	1	2334.1	778.705	0.48	13		1xCarbamidomethyl [C7]	0.00165393	1		1			K.MYGISLCQAILDETKGDYEK.I	[318-337]	Not Used	Not Used
	P04083	Annexin A1 OS=Homo sapiens OX=9606 GN=ANXA1 PE=1 SV=2	NALLSLAKGDRSEDFGVNEDLADSDAR	2	2	2878.38	960.135	2.75	41	40.38		0.00165393	1		1	239275	1	R.NALLSLAKGDRSEDFGVNEDLADSDAR.A	[178-204]	Used	Used
	P04083	Annexin A1 OS=Homo sapiens OX=9606 GN=ANXA1 PE=1 SV=2	SEDFGVNEDLADSDAR	1	0	1739.74	870.371	-0.54	55			0.00165393	1		1			R.SEDFGVNEDLADSDAR.A	[189-204]	Not Used	Not Used
	P04083	Annexin A1 OS=Homo sapiens OX=9606 GN=ANXA1 PE=1 SV=2	TPAQFDADELR	2	0	1262.6	631.804	0.2	58	28.85		0.00165393	1		1	1.5526e+06	1	K.TPAQFDADELR.A	[114-124]	Used	Used
	P04083	Annexin A1 OS=Homo sapiens OX=9606 GN=ANXA1 PE=1 SV=2	TPAQFDADELRAAMK	4	1	1663.81	832.409	0.34	66	35.93		0.00165393	1		1	2.22588e+06	2	K.TPAQFDADELRAAMK.G	[114-128]	Used	Used
	P04083	Annexin A1 OS=Homo sapiens OX=9606 GN=ANXA1 PE=1 SV=2	GDRSEDFGVNEDLADSDAR	4	1	2067.88	1034.45	0.65	66	28.83		0.00165393	1		1	4.40139e+06	2	K.GDRSEDFGVNEDLADSDAR.A	[186-204]	Used	Used
	P04083	Annexin A1 OS=Homo sapiens OX=9606 GN=ANXA1 PE=1 SV=2	AMVSEFLKQAWFIENEEQEYVQTVK	1	1	3088.5	1030.17	1.51	18		1xAcetyl [N-Term]	0.00165393	1		1			M.AMVSEFLKQAWFIENEEQEYVQTVK.S	[2-26]	Not Used	Not Used
	P04083	Annexin A1 OS=Homo sapiens OX=9606 GN=ANXA1 PE=1 SV=2	GGPGSAVSPYPTFNPSSDVAALHK	2	0	2356.16	786.058	1.15	42			0.00165393	1		1			K.GGPGSAVSPYPTFNPSSDVAALHK.A	[30-53]	Not Used	Not Used
	P04083	Annexin A1 OS=Homo sapiens OX=9606 GN=ANXA1 PE=1 SV=2	GLGTDEDTLIEILASR	2	0	1702.89	851.946	-0.3	108	56.85		0.00165393	1		1	442359	1	K.GLGTDEDTLIEILASR.T	[129-144]	Used	Used
	P04083	Annexin A1 OS=Homo sapiens OX=9606 GN=ANXA1 PE=1 SV=2	DITSDTSGDFR	2	0	1213.53	607.27	0.34	37	24.18		0.00165393	1		1	1.41378e+06	1	K.DITSDTSGDFR.N	[167-177]	Used	Used
	P04083	Annexin A1 OS=Homo sapiens OX=9606 GN=ANXA1 PE=1 SV=2	DLAKDITSDTSGDFR	2	1	1640.78	820.892	0.32	63	34.84		0.00165393	1		1	2.52169e+06	1	R.DLAKDITSDTSGDFR.N	[163-177]	Used	Used
	P04083	Annexin A1 OS=Homo sapiens OX=9606 GN=ANXA1 PE=1 SV=2	AAYLQETGKPLDETLKK	4	1	1905.03	635.682	0.07	24	27.56		0.00165393	1		1	6.97621e+06	2	K.AAYLQETGKPLDETLKK.A	[82-98]	Used	Used
	P04083	Annexin A1 OS=Homo sapiens OX=9606 GN=ANXA1 PE=1 SV=2	GTDVNVFNTILTTR	1	0	1550.82	775.913	0.41	69	50.35		0.00165393	1		1	252740	1	K.GTDVNVFNTILTTR.S	[215-228]	Used	Used
	P04083	Annexin A1 OS=Homo sapiens OX=9606 GN=ANXA1 PE=1 SV=2	GVDEATIIDILTKR	3	1	1543.87	772.438	-0.15	92	52.56		0.00165393	1		1	2121017	1	K.GVDEATIIDILTKR.N	[59-72]	Used	Used
	P04083	Annexin A1 OS=Homo sapiens OX=9606 GN=ANXA1 PE=1 SV=2	AMVSEFLKQAWFIENEEQEYVQTVKSSK	1	2	3390.66	1130.89	3.28	22		1xAcetyl [N-Term]	0.0024483	1		1			M.AMVSEFLKQAWFIENEEQEYVQTVKSSK.G	[2-29]	Not Used	Not Used
P13796	Plastin-2 OS=Homo sapiens OX=9606 GN=LCP1 PE=1 SV=6	22	627	70.2	5.43	0	404	1	10	10	19	2.11806e+07	10	0.00538701
	Master Protein Accessions	Master Protein Descriptions	Sequence	# PSMs	# Missed Cleavages	Theo. MH+ [Da]	m/z [Da] (by Search Engine): Mascot	DeltaM [ppm] (by Search Engine): Mascot	Ions Score (by Search Engine): Mascot	Top Apex RT [min]	Modifications	Qvality q-value	# Proteins		# Protein Groups	Abundance: F1764: n/a, Sample, n/a, n/a	Abundances Count: F1764: n/a, Sample, n/a, n/a	Sequence in Protein	Positions in Proteins	Quan Usage	Quan Ratio Usage
	P13796	Plastin-2 OS=Homo sapiens OX=9606 GN=LCP1 PE=1 SV=6	MINLSVPDTIDER	2	0	1502.75	751.88	-0.03	31	40.63		0.00165393	2		1	973343	1	K.MINLSVPDTIDER.T	[166-178]	Used	Used
	P13796	Plastin-2 OS=Homo sapiens OX=9606 GN=LCP1 PE=1 SV=6	IGNFSTDIKDSK	2	1	1324.67	662.841	-0.09	66	24.02		0.00165393	1		1	1.58984e+06	1	K.IGNFSTDIKDSK.A	[286-297]	Used	Used
	P13796	Plastin-2 OS=Homo sapiens OX=9606 GN=LCP1 PE=1 SV=6	VYALPEDLVEVNPK	2	0	1585.85	793.428	0.7	21	43.34		0.00165393	1		1	755135	1	R.VYALPEDLVEVNPK.M	[597-610]	Used	Used
	P13796	Plastin-2 OS=Homo sapiens OX=9606 GN=LCP1 PE=1 SV=6	TENLNDDEKLNNAK	4	1	1617.77	809.39	0.28	56	17.88		0.00165393	1		1	3.52867e+06	2	K.TENLNDDEKLNNAK.Y	[571-584]	Used	Used
	P13796	Plastin-2 OS=Homo sapiens OX=9606 GN=LCP1 PE=1 SV=6	FSLVGIGGQDLNEGNR	2	0	1675.84	838.423	-0.25	67	41.64		0.00165393	1		1	348677	1	K.FSLVGIGGQDLNEGNR.T	[473-488]	Used	Used
	P13796	Plastin-2 OS=Homo sapiens OX=9606 GN=LCP1 PE=1 SV=6	AYYHLLEQVAPK	2	0	1431.76	716.385	0.22	38	35.31		0.00165393	1		1	953493	1	K.AYYHLLEQVAPK.G	[298-309]	Used	Used
	P13796	Plastin-2 OS=Homo sapiens OX=9606 GN=LCP1 PE=1 SV=6	HVIPMNPNTNDLFNAVGDGIVLCK	1	0	2638.31	880.108	-0.91	30	50.89	1xCarbamidomethyl [C23]	0.00165393	1		1	217513	1	R.HVIPMNPNTNDLFNAVGDGIVLCK.M	[142-165]	Used	Used
	P13796	Plastin-2 OS=Homo sapiens OX=9606 GN=LCP1 PE=1 SV=6	KLENCNYAVELGKNQAK	2	2	1979	660.339	-0.09	35	23.56	1xCarbamidomethyl [C5]	0.00165393	1		1	1.08669e+06	1	K.KLENCNYAVELGKNQAK.F	[456-472]	Used	Used
	P13796	Plastin-2 OS=Homo sapiens OX=9606 GN=LCP1 PE=1 SV=6	IKVPVDWNR	1	1	1126.64	563.822	0.25	15	30.89		0.00456775	1		1	3677154	1	K.IKVPVDWNR.V	[433-441]	Used	Used
	P13796	Plastin-2 OS=Homo sapiens OX=9606 GN=LCP1 PE=1 SV=6	VNKPPYPK	1	0	942.541	471.774	-1.02	23	16.73		0.00456775	2		1	8.05006e+06	1	R.VNKPPYPK.L	[442-449]	Used	Used
P35573	Glycogen debranching enzyme OS=Homo sapiens OX=9606 GN=AGL PE=1 SV=3	13	1532	174.7	6.76	0	659	1	16	16	36	1.89836e+07	14	0.010207
	Master Protein Accessions	Master Protein Descriptions	Sequence	# PSMs	# Missed Cleavages	Theo. MH+ [Da]	m/z [Da] (by Search Engine): Mascot	DeltaM [ppm] (by Search Engine): Mascot	Ions Score (by Search Engine): Mascot	Top Apex RT [min]	Modifications	Qvality q-value	# Proteins		# Protein Groups	Abundance: F1764: n/a, Sample, n/a, n/a	Abundances Count: F1764: n/a, Sample, n/a, n/a	Sequence in Protein	Positions in Proteins	Quan Usage	Quan Ratio Usage
	P35573	Glycogen debranching enzyme OS=Homo sapiens OX=9606 GN=AGL PE=1 SV=3	SGGGYIVVDPILR	2	0	1345.75	673.377	0.12	42	43.36		0.00165393	1		1	793289	1	K.SGGGYIVVDPILR.V	[102-114]	Used	Used
	P35573	Glycogen debranching enzyme OS=Homo sapiens OX=9606 GN=AGL PE=1 SV=3	ILLLNEMEKLEK	4	1	1472.84	736.924	0.52	55	48.38		0.00165393	1		1	3.1145e+06	2	R.ILLLNEMEKLEK.T	[9-20]	Used	Used
	P35573	Glycogen debranching enzyme OS=Homo sapiens OX=9606 GN=AGL PE=1 SV=3	VGADNHVLPLDCVTLQTFLAK	3	0	2311.21	771.075	0.11	44		1xCarbamidomethyl [C12]	0.00165393	1		1			R.VGADNHVLPLDCVTLQTFLAK.C	[115-135]	Not Used	Not Used
	P35573	Glycogen debranching enzyme OS=Homo sapiens OX=9606 GN=AGL PE=1 SV=3	YTWNDVGQLVEK	2	0	1451.72	726.362	0.63	57	41.41		0.00165393	1		1	476046	1	K.YTWNDVGQLVEK.L	[192-203]	Used	Used
	P35573	Glycogen debranching enzyme OS=Homo sapiens OX=9606 GN=AGL PE=1 SV=3	EVPQMCIPGKIEEVVLEAR	3	1	2197.14	733.049	-0.78	17	53.41	1xCarbamidomethyl [C6]	0.00165393	1		1	880894	1	K.EVPQMCIPGKIEEVVLEAR.T	[762-780]	Used	Used
	P35573	Glycogen debranching enzyme OS=Homo sapiens OX=9606 GN=AGL PE=1 SV=3	DGSAVEIVGLSK	2	0	1174.63	587.82	0.5	45	32.79		0.00165393	1		1	436177	1	R.DGSAVEIVGLSK.S	[1280-1291]	Used	Used
	P35573	Glycogen debranching enzyme OS=Homo sapiens OX=9606 GN=AGL PE=1 SV=3	KIIWEDIFPK	4	1	1288.73	644.869	0.14	66	49.03		0.00165393	1		1	2.75916e+06	1	R.KIIWEDIFPK.L	[286-295]	Used	Used
	P35573	Glycogen debranching enzyme OS=Homo sapiens OX=9606 GN=AGL PE=1 SV=3	GYDELVPHQISVVSEER	2	0	1956.97	978.987	0.31	53	38.05		0.00165393	1		1	652484	1	R.GYDELVPHQISVVSEER.F	[659-675]	Used	Used
	P35573	Glycogen debranching enzyme OS=Homo sapiens OX=9606 GN=AGL PE=1 SV=3	GIPALIENDHHMNSIR	2	0	1816.91	908.959	-1.09	31	32.64		0.00165393	1		1	557454	1	K.GIPALIENDHHMNSIR.K	[270-285]	Used	Used
	P35573	Glycogen debranching enzyme OS=Homo sapiens OX=9606 GN=AGL PE=1 SV=3	NIFPYHEVTVK	1	0	1346.71	673.859	-0.22	15	32.79		0.0024483	1		1	179814	1	K.NIFPYHEVTVK.R	[1304-1314]	Used	Used
	P35573	Glycogen debranching enzyme OS=Homo sapiens OX=9606 GN=AGL PE=1 SV=3	LFHVSEDPSDLNEK	1	0	1629.78	815.392	1.13	15			0.00339245	1		1			K.LFHVSEDPSDLNEK.H	[1338-1351]	Not Used	Not Used
	P35573	Glycogen debranching enzyme OS=Homo sapiens OX=9606 GN=AGL PE=1 SV=3	EHIQLNESK	2	0	1097.56	549.283	0.41	29	17.66		0.00411958	1		1	1625873	1	R.EHIQLNESK.I	[808-816]	Used	Used
	P35573	Glycogen debranching enzyme OS=Homo sapiens OX=9606 GN=AGL PE=1 SV=3	LEQGYELQFR	2	0	1282.64	641.824	-1.13	28	34.49		0.00456775	1		1	796022	1	R.LEQGYELQFR.L	[25-34]	Used	Used
	P35573	Glycogen debranching enzyme OS=Homo sapiens OX=9606 GN=AGL PE=1 SV=3	HMQGIQFR	3	0	1016.51	508.758	-0.04	20	24.76		0.00456775	1		1	4.904e+06	1	K.HMQGIQFR.E	[1211-1218]	Used	Used
	P35573	Glycogen debranching enzyme OS=Homo sapiens OX=9606 GN=AGL PE=1 SV=3	FNCGTWMDK	2	0	1158.47	579.739	0.25	35	29.87	1xCarbamidomethyl [C3]	0.00456775	1		1	788592	1	R.FNCGTWMDK.M	[1254-1262]	Used	Used
	P35573	Glycogen debranching enzyme OS=Homo sapiens OX=9606 GN=AGL PE=1 SV=3	WLLELSKK	1	1	1016.61	508.81	-0.17	11	37.91		0.00608856	1		1	1.01928e+06	1	R.WLLELSKK.N	[1296-1303]	Used	Used
P31949	Protein S100-A11 OS=Homo sapiens OX=9606 GN=S100A11 PE=1 SV=2	48	105	11.7	7.12	0	363	1	5	5	11	1.82343e+07	5	0.0031188
	Master Protein Accessions	Master Protein Descriptions	Sequence	# PSMs	# Missed Cleavages	Theo. MH+ [Da]	m/z [Da] (by Search Engine): Mascot	DeltaM [ppm] (by Search Engine): Mascot	Ions Score (by Search Engine): Mascot	Top Apex RT [min]	Modifications	Qvality q-value	# Proteins		# Protein Groups	Abundance: F1764: n/a, Sample, n/a, n/a	Abundances Count: F1764: n/a, Sample, n/a, n/a	Sequence in Protein	Positions in Proteins	Quan Usage	Quan Ratio Usage
	P31949	Protein S100-A11 OS=Homo sapiens OX=9606 GN=S100A11 PE=1 SV=2	YAGKDGYNYTLSK	2	1	1479.71	740.359	-0.43	74	21.9		0.00165393	1		1	2.82544e+06	1	K.YAGKDGYNYTLSK.T	[24-36]	Used	Used
	P31949	Protein S100-A11 OS=Homo sapiens OX=9606 GN=S100A11 PE=1 SV=2	TEFLSFMNTELAAFTK	2	0	1849.9	925.456	0.13	86	61.24		0.00165393	1		1	119847	1	K.TEFLSFMNTELAAFTK.N	[37-52]	Used	Used
	P31949	Protein S100-A11 OS=Homo sapiens OX=9606 GN=S100A11 PE=1 SV=2	CIESLIAVFQK	2	0	1307.7	654.355	0.06	68	52.62	1xCarbamidomethyl [C1]	0.00165393	1		1	475284	1	R.CIESLIAVFQK.Y	[13-23]	Used	Used
	P31949	Protein S100-A11 OS=Homo sapiens OX=9606 GN=S100A11 PE=1 SV=2	NQKDPGVLDR	3	1	1141.6	571.302	0.1	29	17.72		0.0024483	1		1	13860480	1	K.NQKDPGVLDR.M	[53-62]	Used	Used
	P31949	Protein S100-A11 OS=Homo sapiens OX=9606 GN=S100A11 PE=1 SV=2	DGYNYTLSK	2	0	1060.49	530.751	0.1	17	23.22		0.00411958	1		1	953218	1	K.DGYNYTLSK.T	[28-36]	Used	Used
P05107	Integrin beta-2 OS=Homo sapiens OX=9606 GN=ITGB2 PE=1 SV=2	23	769	84.7	6.95	0	400	1	12	12	20	1.82076e+07	11	0.00567054
	Master Protein Accessions	Master Protein Descriptions	Sequence	# PSMs	# Missed Cleavages	Theo. MH+ [Da]	m/z [Da] (by Search Engine): Mascot	DeltaM [ppm] (by Search Engine): Mascot	Ions Score (by Search Engine): Mascot	Top Apex RT [min]	Modifications	Qvality q-value	# Proteins		# Protein Groups	Abundance: F1764: n/a, Sample, n/a, n/a	Abundances Count: F1764: n/a, Sample, n/a, n/a	Sequence in Protein	Positions in Proteins	Quan Usage	Quan Ratio Usage
	P05107	Integrin beta-2 OS=Homo sapiens OX=9606 GN=ITGB2 PE=1 SV=2	VFLDHNALPDTLK	4	0	1482.8	741.901	0.35	63	35.84		0.00165393	1		1	6.20301e+06	2	R.VFLDHNALPDTLK.V	[367-379]	Used	Used
	P05107	Integrin beta-2 OS=Homo sapiens OX=9606 GN=ITGB2 PE=1 SV=2	VTATECIQEQSFVIR	1	0	1780.89	890.948	-0.46	34	37.44	1xCarbamidomethyl [C6]	0.00165393	1		1	188450	1	K.VTATECIQEQSFVIR.A	[415-429]	Used	Used
	P05107	Integrin beta-2 OS=Homo sapiens OX=9606 GN=ITGB2 PE=1 SV=2	SNEFDYPSVGQLAHK	2	0	1691.8	846.406	1.02	32	33.71		0.00165393	1		1	1.25916e+06	1	R.SNEFDYPSVGQLAHK.L	[296-310]	Used	Used
	P05107	Integrin beta-2 OS=Homo sapiens OX=9606 GN=ITGB2 PE=1 SV=2	TTEGCLNPR	2	0	1047.49	524.248	0.14	51	17.19	1xCarbamidomethyl [C5]	0.00165393	1		1	5305260	1	R.TTEGCLNPR.R	[578-586]	Used	Used
	P05107	Integrin beta-2 OS=Homo sapiens OX=9606 GN=ITGB2 PE=1 SV=2	GFLECGICR	2	0	1111.5	556.255	0	38	31.9	2xCarbamidomethyl [C5; C8]	0.00165393	1		1	2.48773e+06	1	K.GFLECGICR.C	[463-471]	Used	Used
	P05107	Integrin beta-2 OS=Homo sapiens OX=9606 GN=ITGB2 PE=1 SV=2	GCAADDIMDPTSLAETQEDHNGGQK	2	0	2660.12	887.378	-0.04	38	34.14	1xCarbamidomethyl [C2]	0.00165393	1		1	216539	1	R.GCAADDIMDPTSLAETQEDHNGGQK.Q	[72-96]	Used	Used
	P05107	Integrin beta-2 OS=Homo sapiens OX=9606 GN=ITGB2 PE=1 SV=2	GDCDGVQINVPITFQVK	2	0	1889.94	945.473	-2.04	40		1xCarbamidomethyl [C3]	0.00165393	1		1			R.GDCDGVQINVPITFQVK.V	[398-414]	Not Used	Not Used
	P05107	Integrin beta-2 OS=Homo sapiens OX=9606 GN=ITGB2 PE=1 SV=2	CHPGFEGSACQCER	1	0	1694.65	847.828	1.58	23	17.65	3xCarbamidomethyl [C1; C10; C12]	0.00165393	1		1	544174	1	R.CHPGFEGSACQCER.T	[564-577]	Used	Used
	P05107	Integrin beta-2 OS=Homo sapiens OX=9606 GN=ITGB2 PE=1 SV=2	CNVCECHSGYQLPLCQECPGCPSPCGK	1	0	3254.27	1085.43	0.93	36	31.7	7xCarbamidomethyl [C1; C4; C6; C15; C18; C21; C25]	0.00165393	1		1	591745	1	R.CNVCECHSGYQLPLCQECPGCPSPCGK.Y	[598-624]	Used	Used
	P05107	Integrin beta-2 OS=Homo sapiens OX=9606 GN=ITGB2 PE=1 SV=2	YISCAECLKFEK	1	1	1547.72	774.366	1.49	22	28.97	2xCarbamidomethyl [C4; C7]	0.0024483	1		1	386207	1	K.YISCAECLKFEK.G	[625-636]	Used	Used
	P05107	Integrin beta-2 OS=Homo sapiens OX=9606 GN=ITGB2 PE=1 SV=2	ALNEITESGR	1	0	1089.55	545.281	0.39	27	21.13		0.00411958	1		1	796214	1	R.ALNEITESGR.I	[156-165]	Used	Used
	P05107	Integrin beta-2 OS=Homo sapiens OX=9606 GN=ITGB2 PE=1 SV=2	ECQPPFAFR	1	0	1151.53	576.269	0.27	17	34.5	1xCarbamidomethyl [C2]	0.00456775	1		1	229109	1	K.ECQPPFAFR.H	[197-205]	Used	Used
P00558	Phosphoglycerate kinase 1 OS=Homo sapiens OX=9606 GN=PGK1 PE=1 SV=3	40	417	44.6	8.1	0	557	1	12	12	29	1.80294e+07	11	0.00822229
	Master Protein Accessions	Master Protein Descriptions	Sequence	# PSMs	# Missed Cleavages	Theo. MH+ [Da]	m/z [Da] (by Search Engine): Mascot	DeltaM [ppm] (by Search Engine): Mascot	Ions Score (by Search Engine): Mascot	Top Apex RT [min]	Modifications	Qvality q-value	# Proteins		# Protein Groups	Abundance: F1764: n/a, Sample, n/a, n/a	Abundances Count: F1764: n/a, Sample, n/a, n/a	Sequence in Protein	Positions in Proteins	Quan Usage	Quan Ratio Usage
	P00558	Phosphoglycerate kinase 1 OS=Homo sapiens OX=9606 GN=PGK1 PE=1 SV=3	LGDVYVNDAFGTAHR	4	0	1634.79	817.9	0.59	79	33.57		0.00165393	2		1	4.33996e+06	2	K.LGDVYVNDAFGTAHR.A	[157-171]	Used	Used
	P00558	Phosphoglycerate kinase 1 OS=Homo sapiens OX=9606 GN=PGK1 PE=1 SV=3	ITLPVDFVTADKFDENAK	2	1	2023.04	1012.02	0.59	92			0.00165393	1		1			K.ITLPVDFVTADKFDENAK.T	[280-297]	Not Used	Not Used
	P00558	Phosphoglycerate kinase 1 OS=Homo sapiens OX=9606 GN=PGK1 PE=1 SV=3	SLLGKDVLFLK	2	1	1232.76	616.884	0.09	45	45.44		0.00165393	2		1	746664	1	K.SLLGKDVLFLK.D	[87-97]	Used	Used
	P00558	Phosphoglycerate kinase 1 OS=Homo sapiens OX=9606 GN=PGK1 PE=1 SV=3	SLLGKDVLFLKDCVGPEVEK	2	2	2246.21	749.408	-0.23	14	46.57	1xCarbamidomethyl [C13]	0.00165393	1		1	555531	1	K.SLLGKDVLFLKDCVGPEVEK.A	[87-106]	Used	Used
	P00558	Phosphoglycerate kinase 1 OS=Homo sapiens OX=9606 GN=PGK1 PE=1 SV=3	SLSNKLTLDKLDVK	2	2	1615.93	808.467	0.02	51	37.96	1xAcetyl [N-Term]	0.00165393	1		1	1685022	2	M.SLSNKLTLDKLDVK.G	[2-15]	Used	Used
	P00558	Phosphoglycerate kinase 1 OS=Homo sapiens OX=9606 GN=PGK1 PE=1 SV=3	VDFNVPMKNNQITNNQR	2	1	2032	678.006	-0.29	20	29.98		0.00165393	1		1	472572	1	R.VDFNVPMKNNQITNNQR.I	[23-39]	Used	Used
	P00558	Phosphoglycerate kinase 1 OS=Homo sapiens OX=9606 GN=PGK1 PE=1 SV=3	TGQATVASGIPAGWMGLDCGPESSKK	2	1	2605.24	869.085	0.56	25	42.43	1xCarbamidomethyl [C19]	0.00165393	1		1	659663	1	K.TGQATVASGIPAGWMGLDCGPESSKK.Y	[298-323]	Used	Used
	P00558	Phosphoglycerate kinase 1 OS=Homo sapiens OX=9606 GN=PGK1 PE=1 SV=3	ALESPERPFLAILGGAK	3	0	1769	590.337	0.21	26	50.77		0.00165393	1		1	338283	2	K.ALESPERPFLAILGGAK.V	[200-216]	Used	Used
	P00558	Phosphoglycerate kinase 1 OS=Homo sapiens OX=9606 GN=PGK1 PE=1 SV=3	ACANPAAGSVILLENLR	4	0	1768.94	884.972	-0.2	61	50.52	1xCarbamidomethyl [C2]	0.00165393	1		1	657114	2	K.ACANPAAGSVILLENLR.F	[107-123]	Used	Used
	P00558	Phosphoglycerate kinase 1 OS=Homo sapiens OX=9606 GN=PGK1 PE=1 SV=3	AEPAKIEAFR	2	1	1131.62	566.312	0.07	33	23.43		0.00165393	1		1	1.97587e+06	1	K.AEPAKIEAFR.A	[142-151]	Used	Used
	P00558	Phosphoglycerate kinase 1 OS=Homo sapiens OX=9606 GN=PGK1 PE=1 SV=3	AHSSMVGVNLPQK	2	0	1367.71	684.359	1	41	24.83		0.00165393	1		1	1.09164e+06	1	R.AHSSMVGVNLPQK.A	[172-184]	Used	Used
	P00558	Phosphoglycerate kinase 1 OS=Homo sapiens OX=9606 GN=PGK1 PE=1 SV=3	LTLDKLDVK	2	1	1044.63	522.819	0.07	30	29.87		0.00456775	1		1	5.50711e+06	1	K.LTLDKLDVK.G	[7-15]	Used	Used
P0DMV8	Heat shock 70 kDa protein 1A OS=Homo sapiens OX=9606 GN=HSPA1A PE=1 SV=1	24	641	70	5.66	0	581	1	10	13	27	1.70002e+07	10	0.00765523
	Master Protein Accessions	Master Protein Descriptions	Sequence	# PSMs	# Missed Cleavages	Theo. MH+ [Da]	m/z [Da] (by Search Engine): Mascot	DeltaM [ppm] (by Search Engine): Mascot	Ions Score (by Search Engine): Mascot	Top Apex RT [min]	Modifications	Qvality q-value	# Proteins		# Protein Groups	Abundance: F1764: n/a, Sample, n/a, n/a	Abundances Count: F1764: n/a, Sample, n/a, n/a	Sequence in Protein	Positions in Proteins	Quan Usage	Quan Ratio Usage
	P0DMV8	Heat shock 70 kDa protein 1A OS=Homo sapiens OX=9606 GN=HSPA1A PE=1 SV=1	NQVALNPQNTVFDAK	2	0	1658.85	829.929	0.94	55	34.16		0.00165393	1		1	321770	1	K.NQVALNPQNTVFDAK.R	[57-71]	Used	Used
	P0DMV8	Heat shock 70 kDa protein 1A OS=Homo sapiens OX=9606 GN=HSPA1A PE=1 SV=1	NQVALNPQNTVFDAKR	4	1	1814.95	907.979	0.05	35	30.94		0.00165393	1		1	4.49187e+06	2	K.NQVALNPQNTVFDAKR.L	[57-72]	Used	Used
	P0DMV8	Heat shock 70 kDa protein 1A OS=Homo sapiens OX=9606 GN=HSPA1A PE=1 SV=1	QATKDAGVIAGLNVLR	2	1	1625.93	542.65	0.88	18	39.66		0.00165393	2		1	211236	1	R.QATKDAGVIAGLNVLR.I	[156-171]	Used	Used
	P0DMV8	Heat shock 70 kDa protein 1A OS=Homo sapiens OX=9606 GN=HSPA1A PE=1 SV=1	IINEPTAAAIAYGLDR	2	0	1687.9	844.454	-0.19	43	43		0.00165393	2		1	371329	1	R.IINEPTAAAIAYGLDR.T	[172-187]	Used	Used
	P11142; P11021; P0DMV8	Heat shock cognate 71 kDa protein OS=Homo sapiens OX=9606 GN=HSPA8 PE=1 SV=1 Endoplasmic reticulum chaperone BiP OS=Homo sapiens OX=9606 GN=HSPA5 PE=1 SV=2 Heat shock 70 kDa protein 1A OS=Homo sapiens OX=9606 GN=HSPA1A PE=1 SV=1	VEIIANDQGNR	2	0	1228.63	614.813	-8.24	26	20.73		0.00165393	5		3	529306	1	K.VEIIANDQGNR.T	[26-36]	Not Used	Not Used
	P11142; P0DMV8	Heat shock cognate 71 kDa protein OS=Homo sapiens OX=9606 GN=HSPA8 PE=1 SV=1 Heat shock 70 kDa protein 1A OS=Homo sapiens OX=9606 GN=HSPA1A PE=1 SV=1	TTPSYVAFTDTER	2	0	1487.7	744.355	0.95	39	31.67		0.00165393	6		2	855254	1	R.TTPSYVAFTDTER.L	[37-49]	Not Used	Not Used
	P0DMV8	Heat shock 70 kDa protein 1A OS=Homo sapiens OX=9606 GN=HSPA1A PE=1 SV=1	AQIHDLVLVGGSTR	2	0	1465.81	733.41	-0.15	70	31.94		0.00165393	1		1	798709	1	K.AQIHDLVLVGGSTR.I	[329-342]	Used	Used
	P0DMV8	Heat shock 70 kDa protein 1A OS=Homo sapiens OX=9606 GN=HSPA1A PE=1 SV=1	ATAGDTHLGGEDFDNR	1	0	1675.73	838.369	-0.12	45	22.09		0.00165393	4		1	290503	1	K.ATAGDTHLGGEDFDNR.L	[221-236]	Used	Used
	P0DMV8	Heat shock 70 kDa protein 1A OS=Homo sapiens OX=9606 GN=HSPA1A PE=1 SV=1	ARFEELCSDLFR	2	1	1542.74	771.872	0.02	49	42.61	1xCarbamidomethyl [C7]	0.00165393	3		1	1.53929e+06	1	R.ARFEELCSDLFR.S	[300-311]	Used	Used
	P0DMV8	Heat shock 70 kDa protein 1A OS=Homo sapiens OX=9606 GN=HSPA1A PE=1 SV=1	LVNHFVEEFK	2	0	1261.66	631.333	0.95	40	33.12		0.0024483	1		1	517071	1	R.LVNHFVEEFK.R	[237-246]	Used	Used
	P0DMV8	Heat shock 70 kDa protein 1A OS=Homo sapiens OX=9606 GN=HSPA1A PE=1 SV=1	LSKEEIER	2	1	1003.54	502.274	-0.23	41	16.88		0.0024483	2		1	7.9313e+06	1	R.LSKEEIER.M	[510-517]	Used	Used
	P0DMV8	Heat shock 70 kDa protein 1A OS=Homo sapiens OX=9606 GN=HSPA1A PE=1 SV=1	KFGDPVVQSDMK	2	1	1350.67	675.84	0.9	14	24.48		0.00411958	1		1	527100	1	R.KFGDPVVQSDMK.H	[77-88]	Used	Used
	P11142; P0DMV8	Heat shock cognate 71 kDa protein OS=Homo sapiens OX=9606 GN=HSPA8 PE=1 SV=1 Heat shock 70 kDa protein 1A OS=Homo sapiens OX=9606 GN=HSPA1A PE=1 SV=1	ITITNDKGR	2	1	1017.57	509.289	1.01	24	16.66		0.00535372	5		2	3.11441e+06	1	K.ITITNDKGR.L	[501-509]	Not Used	Not Used
P26038	Moesin OS=Homo sapiens OX=9606 GN=MSN PE=1 SV=3	24	577	67.8	6.4	0	422	1	14	14	27	1.68384e+07	14	0.00765523
	Master Protein Accessions	Master Protein Descriptions	Sequence	# PSMs	# Missed Cleavages	Theo. MH+ [Da]	m/z [Da] (by Search Engine): Mascot	DeltaM [ppm] (by Search Engine): Mascot	Ions Score (by Search Engine): Mascot	Top Apex RT [min]	Modifications	Qvality q-value	# Proteins		# Protein Groups	Abundance: F1764: n/a, Sample, n/a, n/a	Abundances Count: F1764: n/a, Sample, n/a, n/a	Sequence in Protein	Positions in Proteins	Quan Usage	Quan Ratio Usage
	P26038	Moesin OS=Homo sapiens OX=9606 GN=MSN PE=1 SV=3	SGYLAGDKLLPQR	3	1	1417.78	709.393	-0.44	45	30.92		0.00165393	1		1	1.62739e+06	2	K.SGYLAGDKLLPQR.V	[144-156]	Used	Used
	P26038	Moesin OS=Homo sapiens OX=9606 GN=MSN PE=1 SV=3	LKQIEEQTK	2	1	1116.63	558.817	0.04	29	16.18		0.00165393	1		1	3.45326e+06	1	R.LKQIEEQTK.K	[351-359]	Used	Used
	P26038	Moesin OS=Homo sapiens OX=9606 GN=MSN PE=1 SV=3	IGFPWSEIR	2	0	1104.58	552.796	0.32	34	49.75		0.00165393	3		1	886311	1	K.IGFPWSEIR.N	[238-246]	Used	Used
	P26038	Moesin OS=Homo sapiens OX=9606 GN=MSN PE=1 SV=3	TANDMIHAENMR	2	0	1402.62	701.813	-1.05	49	22.09		0.00165393	1		1	426686	1	K.TANDMIHAENMR.L	[539-550]	Used	Used
	P26038	Moesin OS=Homo sapiens OX=9606 GN=MSN PE=1 SV=3	AQQELEEQTR	1	0	1231.59	616.299	-0.18	27	16.79		0.00165393	1		1	406946	1	K.AQQELEEQTR.R	[361-370]	Used	Used
	P26038	Moesin OS=Homo sapiens OX=9606 GN=MSN PE=1 SV=3	APDFVFYAPR	2	0	1182.59	591.801	0.02	43	42.16		0.00165393	3		1	432005	1	K.APDFVFYAPR.L	[264-273]	Used	Used
	P26038	Moesin OS=Homo sapiens OX=9606 GN=MSN PE=1 SV=3	ALTSELANARDESK	2	1	1504.76	752.885	1.1	85	23.03		0.00165393	1		1	803072	1	K.ALTSELANARDESK.K	[524-537]	Used	Used
	P26038	Moesin OS=Homo sapiens OX=9606 GN=MSN PE=1 SV=3	KAQQELEEQTR	2	1	1359.69	680.346	-0.61	45	16.2		0.00165393	1		1	874141	1	K.KAQQELEEQTR.R	[360-370]	Used	Used
	P26038	Moesin OS=Homo sapiens OX=9606 GN=MSN PE=1 SV=3	AKFYPEDVSEELIQDITQR	2	1	2281.13	761.049	-0.31	24	56.23		0.00165393	1		1	285818	1	R.AKFYPEDVSEELIQDITQR.L	[82-100]	Used	Used
	P26038	Moesin OS=Homo sapiens OX=9606 GN=MSN PE=1 SV=3	GMLREDAVLEYLK	2	1	1536.81	768.908	0.15	44	44.89		0.00165393	1		1	313426	1	R.GMLREDAVLEYLK.I	[181-193]	Used	Used
	P26038	Moesin OS=Homo sapiens OX=9606 GN=MSN PE=1 SV=3	FVIKPIDK	2	0	959.592	480.3	0.32	30	26.53		0.0024483	3		1	1.19629e+06	1	K.FVIKPIDK.K	[255-262]	Used	Used
	P26038	Moesin OS=Homo sapiens OX=9606 GN=MSN PE=1 SV=3	QRIDEFESM	2	1	1154.51	577.761	0	20	31.8		0.0024483	1		1	913139	1	K.QRIDEFESM.-	[569-577]	Used	Used
	P26038	Moesin OS=Homo sapiens OX=9606 GN=MSN PE=1 SV=3	AQQELEEQTRR	2	1	1387.69	694.35	-0.19	22	16.27		0.00456775	1		1	2.89496e+06	1	K.AQQELEEQTRR.A	[361-371]	Used	Used
	P26038	Moesin OS=Homo sapiens OX=9606 GN=MSN PE=1 SV=3	EKEELMER	1	1	1063.51	532.258	0	22	17.77		0.00535372	2		1	2.32499e+06	1	R.EKEELMER.L	[343-350]	Used	Used
P08133	Annexin A6 OS=Homo sapiens OX=9606 GN=ANXA6 PE=1 SV=3	34	673	75.8	5.6	0	912	1	15	15	35	1.57434e+07	11	0.00992345
	Master Protein Accessions	Master Protein Descriptions	Sequence	# PSMs	# Missed Cleavages	Theo. MH+ [Da]	m/z [Da] (by Search Engine): Mascot	DeltaM [ppm] (by Search Engine): Mascot	Ions Score (by Search Engine): Mascot	Top Apex RT [min]	Modifications	Qvality q-value	# Proteins		# Protein Groups	Abundance: F1764: n/a, Sample, n/a, n/a	Abundances Count: F1764: n/a, Sample, n/a, n/a	Sequence in Protein	Positions in Proteins	Quan Usage	Quan Ratio Usage
	P08133	Annexin A6 OS=Homo sapiens OX=9606 GN=ANXA6 PE=1 SV=3	MLVVLLQGTREEDDVVSEDLVQQDVQDLYEAGELK	1	1	3991.97	1331.33	-0.43	30		1xOxidation [M1]	0.00165393	1		1			K.MLVVLLQGTREEDDVVSEDLVQQDVQDLYEAGELK.W	[157-191]	Not Used	Not Used
	P08133	Annexin A6 OS=Homo sapiens OX=9606 GN=ANXA6 PE=1 SV=3	SLEDALSSDTSGHFR	2	0	1621.75	811.377	0.82	83	33.72		0.00165393	1		1	1687155	1	K.SLEDALSSDTSGHFR.R	[484-498]	Used	Used
	P08133	Annexin A6 OS=Homo sapiens OX=9606 GN=ANXA6 PE=1 SV=3	LILGLMMPPAHYDAK	4	0	1669.88	835.444	0.47	20	48.63		0.00165393	1		1	2.47897e+06	2	R.LILGLMMPPAHYDAK.Q	[428-442]	Used	Used
	P08133	Annexin A6 OS=Homo sapiens OX=9606 GN=ANXA6 PE=1 SV=3	SLYGKDLIADLK	2	1	1335.75	668.379	-0.34	51	39.92		0.00165393	1		1	895577	1	K.SLYGKDLIADLK.Y	[64-75]	Used	Used
	P08133	Annexin A6 OS=Homo sapiens OX=9606 GN=ANXA6 PE=1 SV=3	SLHQAIEGDTSGDFLK	4	0	1717.84	859.423	-0.1	68	32.63		0.00165393	1		1	2.60366e+06	2	K.SLHQAIEGDTSGDFLK.A	[648-663]	Used	Used
	P08133	Annexin A6 OS=Homo sapiens OX=9606 GN=ANXA6 PE=1 SV=3	GFGSDKEAILDIITSR	4	1	1721.91	861.457	0.28	76	49.49		0.00165393	1		1	1.06893e+06	2	K.GFGSDKEAILDIITSR.S	[35-50]	Used	Used
	P08133	Annexin A6 OS=Homo sapiens OX=9606 GN=ANXA6 PE=1 SV=3	GLGTDEDTIIDIITHR	4	0	1768.91	884.957	-0.05	100	54.87		0.00165393	1		1	1.47912e+06	2	K.GLGTDEDTIIDIITHR.S	[378-393]	Used	Used
	P08133	Annexin A6 OS=Homo sapiens OX=9606 GN=ANXA6 PE=1 SV=3	AMEGAGTDEKALIEILATR	1	1	1989.03	663.683	0.77	36			0.00165393	1		1			K.AMEGAGTDEKALIEILATR.T	[447-465]	Not Used	Not Used
	P08133	Annexin A6 OS=Homo sapiens OX=9606 GN=ANXA6 PE=1 SV=3	GAGTDEKTLTR	2	1	1148.59	574.799	0.29	37	16		0.00165393	1		1	410848	1	K.GAGTDEKTLTR.I	[614-624]	Used	Used
	P08133	Annexin A6 OS=Homo sapiens OX=9606 GN=ANXA6 PE=1 SV=3	DLMTDLKSEISGDLAR	2	1	1763.88	882.446	-0.21	61			0.00165393	1		1			R.DLMTDLKSEISGDLAR.L	[412-427]	Not Used	Not Used
	P08133	Annexin A6 OS=Homo sapiens OX=9606 GN=ANXA6 PE=1 SV=3	DLEADIIGDTSGHFQK	2	0	1745.83	873.42	-0.23	61	42.89		0.00165393	1		1	1.15136e+06	1	R.DLEADIIGDTSGHFQK.M	[141-156]	Used	Used
	P08133	Annexin A6 OS=Homo sapiens OX=9606 GN=ANXA6 PE=1 SV=3	GTVRPANDFNPDADAK	4	0	1687.8	844.406	0.51	58	21.17		0.00165393	1		1	3.52673e+06	2	K.GTVRPANDFNPDADAK.A	[355-370]	Used	Used
	P08133	Annexin A6 OS=Homo sapiens OX=9606 GN=ANXA6 PE=1 SV=3	GSIHDFPGFDPNQDAEALYTAMK	1	0	2524.14	842.054	1.51	13	52.03		0.0024483	1		1	135798	1	R.GSIHDFPGFDPNQDAEALYTAMK.G	[12-34]	Used	Used
	P08133	Annexin A6 OS=Homo sapiens OX=9606 GN=ANXA6 PE=1 SV=3	ALIEILATR	1	0	999.62	500.314	0.05	35	43.6		0.0024483	1		1	305270	1	K.ALIEILATR.T	[457-465]	Used	Used
	P08133	Annexin A6 OS=Homo sapiens OX=9606 GN=ANXA6 PE=1 SV=3	VELKGTVRPANDFNPDADAK	1	1	2157.09	719.703	0.78	9			0.00456775	1		1			R.VELKGTVRPANDFNPDADAK.A	[351-370]	Not Used	Not Used
P08637	Low affinity immunoglobulin gamma Fc region receptor III-A OS=Homo sapiens OX=9606 GN=FCGR3A PE=1 SV=2	18	254	29.1	8.07	0	985	1	2	5	72	1.40063e+07	2	0.0204139
	Master Protein Accessions	Master Protein Descriptions	Sequence	# PSMs	# Missed Cleavages	Theo. MH+ [Da]	m/z [Da] (by Search Engine): Mascot	DeltaM [ppm] (by Search Engine): Mascot	Ions Score (by Search Engine): Mascot	Top Apex RT [min]	Modifications	Qvality q-value	# Proteins		# Protein Groups	Abundance: F1764: n/a, Sample, n/a, n/a	Abundances Count: F1764: n/a, Sample, n/a, n/a	Sequence in Protein	Positions in Proteins	Quan Usage	Quan Ratio Usage
	P08637	Low affinity immunoglobulin gamma Fc region receptor III-A OS=Homo sapiens OX=9606 GN=FCGR3A PE=1 SV=2	VLEKDSVTLK	5	1	1131.66	566.333	-2.09	34	20.93		0.00165393	1		1	12668202	1	R.VLEKDSVTLK.C	[37-46]	Used	Used
	P08637; O75015	Low affinity immunoglobulin gamma Fc region receptor III-A OS=Homo sapiens OX=9606 GN=FCGR3A PE=1 SV=2 Low affinity immunoglobulin gamma Fc region receptor III-B OS=Homo sapiens OX=9606 GN=FCGR3B PE=1 SV=2	WVFKEEDPIHLR	57	1	1568.82	523.612	-0.49	32	41.94		0.00165393	2		2	3.52042e+07	16	R.WVFKEEDPIHLR.C	[116-127]	Not Used	Not Used
	P08637; O75015	Low affinity immunoglobulin gamma Fc region receptor III-A OS=Homo sapiens OX=9606 GN=FCGR3A PE=1 SV=2 Low affinity immunoglobulin gamma Fc region receptor III-B OS=Homo sapiens OX=9606 GN=FCGR3B PE=1 SV=2	ATLKDSGSYFCR	6	1	1404.66	702.832	0	26	24.77	1xCarbamidomethyl [C11]	0.00165393	2		2	1.51679e+07	2	K.ATLKDSGSYFCR.G	[162-173]	Not Used	Not Used
	P08637; O75015	Low affinity immunoglobulin gamma Fc region receptor III-A OS=Homo sapiens OX=9606 GN=FCGR3A PE=1 SV=2 Low affinity immunoglobulin gamma Fc region receptor III-B OS=Homo sapiens OX=9606 GN=FCGR3B PE=1 SV=2	DSGSYFCR	2	0	991.394	496.201	0.09	44	22.29	1xCarbamidomethyl [C7]	0.00165393	2		2	4.50062e+06	1	K.DSGSYFCR.G	[166-173]	Not Used	Not Used
	P08637	Low affinity immunoglobulin gamma Fc region receptor III-A OS=Homo sapiens OX=9606 GN=FCGR3A PE=1 SV=2	AVVFLEPQWYR	2	0	1407.74	704.375	0.29	54	49.85		0.00165393	1		1	1.33808e+06	1	K.AVVFLEPQWYR.V	[26-36]	Used	Used
P32942	Intercellular adhesion molecule 3 OS=Homo sapiens OX=9606 GN=ICAM3 PE=1 SV=2	10	547	59.5	5.43	0	103	1	4	4	7	1.39582e+07	4	0.00198469
	Master Protein Accessions	Master Protein Descriptions	Sequence	# PSMs	# Missed Cleavages	Theo. MH+ [Da]	m/z [Da] (by Search Engine): Mascot	DeltaM [ppm] (by Search Engine): Mascot	Ions Score (by Search Engine): Mascot	Top Apex RT [min]	Modifications	Qvality q-value	# Proteins		# Protein Groups	Abundance: F1764: n/a, Sample, n/a, n/a	Abundances Count: F1764: n/a, Sample, n/a, n/a	Sequence in Protein	Positions in Proteins	Quan Usage	Quan Ratio Usage
	P32942	Intercellular adhesion molecule 3 OS=Homo sapiens OX=9606 GN=ICAM3 PE=1 SV=2	WEEELSRQPAVEEPAEVTATVLASR	2	1	2797.4	933.139	1.25	54	46.67		0.00165393	1		1	946664	1	R.WEEELSRQPAVEEPAEVTATVLASR.D	[157-181]	Used	Used
	P32942	Intercellular adhesion molecule 3 OS=Homo sapiens OX=9606 GN=ICAM3 PE=1 SV=2	HVLQCQAR	2	0	1011.52	506.261	0.01	14	15.73	1xCarbamidomethyl [C5]	0.00411958	1		1	9238283	1	R.HVLQCQAR.G	[419-426]	Used	Used
	P32942	Intercellular adhesion molecule 3 OS=Homo sapiens OX=9606 GN=ICAM3 PE=1 SV=2	IALETSLSK	2	0	961.556	481.282	1.07	24	27.56		0.00411958	1		1	1.1187e+06	1	K.IALETSLSK.E	[63-71]	Used	Used
	P32942	Intercellular adhesion molecule 3 OS=Homo sapiens OX=9606 GN=ICAM3 PE=1 SV=2	TFVLPVTPPR	1	0	1126.66	563.835	0.76	18	39.92		0.00456775	1		1	2.65454e+06	1	R.TFVLPVTPPR.L	[215-224]	Used	Used
P37837	Transaldolase OS=Homo sapiens OX=9606 GN=TALDO1 PE=1 SV=2	25	337	37.5	6.81	0	340	1	7	7	13	1.38704e+07	7	0.00368585
	Master Protein Accessions	Master Protein Descriptions	Sequence	# PSMs	# Missed Cleavages	Theo. MH+ [Da]	m/z [Da] (by Search Engine): Mascot	DeltaM [ppm] (by Search Engine): Mascot	Ions Score (by Search Engine): Mascot	Top Apex RT [min]	Modifications	Qvality q-value	# Proteins		# Protein Groups	Abundance: F1764: n/a, Sample, n/a, n/a	Abundances Count: F1764: n/a, Sample, n/a, n/a	Sequence in Protein	Positions in Proteins	Quan Usage	Quan Ratio Usage
	P37837	Transaldolase OS=Homo sapiens OX=9606 GN=TALDO1 PE=1 SV=2	LLGELLQDNAK	2	0	1213.68	607.343	0.52	63	37.68		0.00165393	1		1	1.21225e+06	1	K.LLGELLQDNAK.L	[259-269]	Used	Used
	P37837	Transaldolase OS=Homo sapiens OX=9606 GN=TALDO1 PE=1 SV=2	LSFDKDAMVAR	2	1	1252.64	626.822	0.79	35	28.43		0.00165393	1		1	2.21679e+06	1	R.LSFDKDAMVAR.A	[111-121]	Used	Used
	P37837	Transaldolase OS=Homo sapiens OX=9606 GN=TALDO1 PE=1 SV=2	WLHNEDQMAVEK	4	0	1499.69	750.351	-0.45	42	24.57		0.00165393	1		1	5.56614e+06	2	R.WLHNEDQMAVEK.L	[296-307]	Used	Used
	P37837	Transaldolase OS=Homo sapiens OX=9606 GN=TALDO1 PE=1 SV=2	AAQASDLEKIHLDEK	1	1	1667.86	834.434	0.06	34	26.71		0.00165393	1		1	378695	1	K.AAQASDLEKIHLDEK.S	[278-292]	Used	Used
	P37837	Transaldolase OS=Homo sapiens OX=9606 GN=TALDO1 PE=1 SV=2	ALAGCDFLTISPK	2	0	1392.72	696.864	0.6	60	42.04	1xCarbamidomethyl [C5]	0.00165393	1		1	838978	1	K.ALAGCDFLTISPK.L	[246-258]	Used	Used
	P37837	Transaldolase OS=Homo sapiens OX=9606 GN=TALDO1 PE=1 SV=2	SYEPLEDPGVK	1	0	1233.6	617.304	0.28	30	26.78		0.0024483	1		1	851111	1	K.SYEPLEDPGVK.S	[205-215]	Used	Used
	P37837	Transaldolase OS=Homo sapiens OX=9606 GN=TALDO1 PE=1 SV=2	FAADAVKLER	1	1	1119.62	560.311	-0.9	40	25.12		0.0024483	1		1	2.80642e+06	1	K.FAADAVKLER.M	[315-324]	Used	Used
P13807	Glycogen [starch] synthase, muscle OS=Homo sapiens OX=9606 GN=GYS1 PE=1 SV=2	13	737	83.7	6.18	0	376	1	9	9	21	1.28475e+07	9	0.00595407
	Master Protein Accessions	Master Protein Descriptions	Sequence	# PSMs	# Missed Cleavages	Theo. MH+ [Da]	m/z [Da] (by Search Engine): Mascot	DeltaM [ppm] (by Search Engine): Mascot	Ions Score (by Search Engine): Mascot	Top Apex RT [min]	Modifications	Qvality q-value	# Proteins		# Protein Groups	Abundance: F1764: n/a, Sample, n/a, n/a	Abundances Count: F1764: n/a, Sample, n/a, n/a	Sequence in Protein	Positions in Proteins	Quan Usage	Quan Ratio Usage
	P13807	Glycogen [starch] synthase, muscle OS=Homo sapiens OX=9606 GN=GYS1 PE=1 SV=2	MLDKEDFTMMK	2	1	1388.63	694.817	0.23	51	33.51		0.00165393	1		1	1.04701e+06	1	K.MLDKEDFTMMK.R	[419-429]	Used	Used
	P13807	Glycogen [starch] synthase, muscle OS=Homo sapiens OX=9606 GN=GYS1 PE=1 SV=2	IGLFNSSADR	1	0	1079.55	540.278	-0.04	44	31.78		0.00165393	1		1	767525	1	R.IGLFNSSADR.V	[463-472]	Used	Used
	P13807	Glycogen [starch] synthase, muscle OS=Homo sapiens OX=9606 GN=GYS1 PE=1 SV=2	LSDLLDWK	2	0	989.53	495.269	-0.31	40	44.47		0.00165393	1		1	583776	1	R.LSDLLDWK.Y	[592-599]	Used	Used
	P13807	Glycogen [starch] synthase, muscle OS=Homo sapiens OX=9606 GN=GYS1 PE=1 SV=2	TQVELLEAPTPALKR	4	1	1665.95	833.48	-0.22	39	35.08		0.00165393	1		1	6902538	2	R.TQVELLEAPTPALKR.T	[75-89]	Used	Used
	P13807	Glycogen [starch] synthase, muscle OS=Homo sapiens OX=9606 GN=GYS1 PE=1 SV=2	KLYESLLVGSLPDMNK	4	1	1806.97	903.987	0.08	84	45.48		0.00165393	1		1	697015	2	R.KLYESLLVGSLPDMNK.M	[403-418]	Used	Used
	P13807	Glycogen [starch] synthase, muscle OS=Homo sapiens OX=9606 GN=GYS1 PE=1 SV=2	AKVTGDEWGDNYFLVGPYTEQGVR	2	1	2701.29	901.101	-0.12	35	47.94		0.00165393	1		1	643272	1	K.AKVTGDEWGDNYFLVGPYTEQGVR.T	[51-74]	Used	Used
	P13807	Glycogen [starch] synthase, muscle OS=Homo sapiens OX=9606 GN=GYS1 PE=1 SV=2	KQLWDTANTVK	1	1	1303.7	652.354	-0.2	23	25.64		0.0024483	1		1	619593	1	R.KQLWDTANTVK.E	[387-397]	Used	Used
	P13807	Glycogen [starch] synthase, muscle OS=Homo sapiens OX=9606 GN=GYS1 PE=1 SV=2	MLDKEDFTMMK	1	1	1404.62	702.813	-0.76	15		1xOxidation [M9]	0.00411958	1		1			K.MLDKEDFTMMK.R	[419-429]	Not Used	Not Used
	P13807	Glycogen [starch] synthase, muscle OS=Homo sapiens OX=9606 GN=GYS1 PE=1 SV=2	IGLFNSSADRVK	3	1	1306.71	653.859	0.26	22	29.96		0.00411958	1		1	1.19405e+06	2	R.IGLFNSSADRVK.V	[463-474]	Used	Used
	P13807	Glycogen [starch] synthase, muscle OS=Homo sapiens OX=9606 GN=GYS1 PE=1 SV=2	QLWDTANTVKEK	1	1	1432.74	716.875	0.33	16	25.93		0.00608856	1		1	392761	1	K.QLWDTANTVKEK.F	[388-399]	Used	Used
P08246	Neutrophil elastase OS=Homo sapiens OX=9606 GN=ELANE PE=1 SV=1	10	267	28.5	9.35	0	126	1	4	4	8	1.28368e+07	3	0.00226822
	Master Protein Accessions	Master Protein Descriptions	Sequence	# PSMs	# Missed Cleavages	Theo. MH+ [Da]	m/z [Da] (by Search Engine): Mascot	DeltaM [ppm] (by Search Engine): Mascot	Ions Score (by Search Engine): Mascot	Top Apex RT [min]	Modifications	Qvality q-value	# Proteins		# Protein Groups	Abundance: F1764: n/a, Sample, n/a, n/a	Abundances Count: F1764: n/a, Sample, n/a, n/a	Sequence in Protein	Positions in Proteins	Quan Usage	Quan Ratio Usage
	P08246	Neutrophil elastase OS=Homo sapiens OX=9606 GN=ELANE PE=1 SV=1	VVLGAHNLSR	3	0	1065.62	533.312	-0.06	42	20.69		0.00165393	1		1	5221959	1	R.VVLGAHNLSR.R	[82-91]	Used	Used
	P08246	Neutrophil elastase OS=Homo sapiens OX=9606 GN=ELANE PE=1 SV=1	SNVCTLVR	2	0	948.493	474.75	-0.26	40	22.51	1xCarbamidomethyl [C4]	0.0024483	1		1	1.3274e+06	1	R.SNVCTLVR.G	[184-191]	Used	Used
	P08246	Neutrophil elastase OS=Homo sapiens OX=9606 GN=ELANE PE=1 SV=1	RSNVCTLVR	2	1	1104.59	552.801	0.54	14		1xCarbamidomethyl [C5]	0.00535372	1		1			R.RSNVCTLVR.G	[183-191]	Not Used	Not Used
	P08246	Neutrophil elastase OS=Homo sapiens OX=9606 GN=ELANE PE=1 SV=1	QVFAVQR	1	0	847.478	424.243	0.08	28	22.26		0.00608856	1		1	6287432	1	R.QVFAVQR.I	[97-103]	Used	Used
Q8N6Q3	CD177 antigen OS=Homo sapiens OX=9606 GN=CD177 PE=1 SV=2	9	437	46.3	6.29	0	156	1	3	3	9	1.20474e+07	2	0.00255174
	Master Protein Accessions	Master Protein Descriptions	Sequence	# PSMs	# Missed Cleavages	Theo. MH+ [Da]	m/z [Da] (by Search Engine): Mascot	DeltaM [ppm] (by Search Engine): Mascot	Ions Score (by Search Engine): Mascot	Top Apex RT [min]	Modifications	Qvality q-value	# Proteins		# Protein Groups	Abundance: F1764: n/a, Sample, n/a, n/a	Abundances Count: F1764: n/a, Sample, n/a, n/a	Sequence in Protein	Positions in Proteins	Quan Usage	Quan Ratio Usage
	Q8N6Q3	CD177 antigen OS=Homo sapiens OX=9606 GN=CD177 PE=1 SV=2	QCPTCVQPLGTCSSGSPR	2	0	1991.87	996.441	0.68	76		3xCarbamidomethyl [C2; C5; C12]	0.00165393	1		1			R.QCPTCVQPLGTCSSGSPR.M	[324-341]	Not Used	Not Used
	Q8N6Q3	CD177 antigen OS=Homo sapiens OX=9606 GN=CD177 PE=1 SV=2	GCTEAKDQEPR	2	1	1290.57	645.791	0.29	32	14.78	1xCarbamidomethyl [C2]	0.00165393	1		1	710632	1	K.GCTEAKDQEPR.V	[75-85]	Used	Used
	Q8N6Q3	CD177 antigen OS=Homo sapiens OX=9606 GN=CD177 PE=1 SV=2	GTTHCYDGLLR	5	0	1292.61	646.806	-0.24	39	25.84	1xCarbamidomethyl [C5]	0.00411958	1		1	11336806	2	K.GTTHCYDGLLR.L	[154-164]	Used	Used
P26447	Protein S100-A4 OS=Homo sapiens OX=9606 GN=S100A4 PE=1 SV=1	29	101	11.7	6.11	0	125	1	3	3	7	1.15486e+07	3	0.00198469
	Master Protein Accessions	Master Protein Descriptions	Sequence	# PSMs	# Missed Cleavages	Theo. MH+ [Da]	m/z [Da] (by Search Engine): Mascot	DeltaM [ppm] (by Search Engine): Mascot	Ions Score (by Search Engine): Mascot	Top Apex RT [min]	Modifications	Qvality q-value	# Proteins		# Protein Groups	Abundance: F1764: n/a, Sample, n/a, n/a	Abundances Count: F1764: n/a, Sample, n/a, n/a	Sequence in Protein	Positions in Proteins	Quan Usage	Quan Ratio Usage
	P26447	Protein S100-A4 OS=Homo sapiens OX=9606 GN=S100A4 PE=1 SV=1	SELKELLTR	3	1	1088.63	544.819	-0.27	35	31.4		0.00165393	1		1	5.54028e+06	1	K.SELKELLTR.E	[32-40]	Used	Used
	P26447	Protein S100-A4 OS=Homo sapiens OX=9606 GN=S100A4 PE=1 SV=1	RTDEAAFQK	2	1	1065.53	533.27	-0.12	39	16.55		0.00165393	1		1	3.03698e+06	1	K.RTDEAAFQK.L	[49-57]	Used	Used
	P26447	Protein S100-A4 OS=Homo sapiens OX=9606 GN=S100A4 PE=1 SV=1	ALDVMVSTFHK	2	0	1247.65	624.326	-0.25	42	33.73		0.00165393	1		1	2.97132e+06	1	K.ALDVMVSTFHK.Y	[8-18]	Used	Used
P11215	Integrin alpha-M OS=Homo sapiens OX=9606 GN=ITGAM PE=1 SV=2	6	1152	127.1	7.23	0	235	1	5	5	11	1.12881e+07	4	0.0031188
	Master Protein Accessions	Master Protein Descriptions	Sequence	# PSMs	# Missed Cleavages	Theo. MH+ [Da]	m/z [Da] (by Search Engine): Mascot	DeltaM [ppm] (by Search Engine): Mascot	Ions Score (by Search Engine): Mascot	Top Apex RT [min]	Modifications	Qvality q-value	# Proteins		# Protein Groups	Abundance: F1764: n/a, Sample, n/a, n/a	Abundances Count: F1764: n/a, Sample, n/a, n/a	Sequence in Protein	Positions in Proteins	Quan Usage	Quan Ratio Usage
	P11215	Integrin alpha-M OS=Homo sapiens OX=9606 GN=ITGAM PE=1 SV=2	LPSHSDFLAELR	2	0	1384.72	692.865	0.04	63	39.51		0.00165393	1		1	692910	1	R.LPSHSDFLAELR.K	[1004-1015]	Used	Used
	P11215	Integrin alpha-M OS=Homo sapiens OX=9606 GN=ITGAM PE=1 SV=2	VMQHQYQVSNLGQR	4	0	1687.83	563.283	0.03	50	22.24		0.00165393	1		1	6.15511e+06	2	R.VMQHQYQVSNLGQR.S	[950-963]	Used	Used
	P11215	Integrin alpha-M OS=Homo sapiens OX=9606 GN=ITGAM PE=1 SV=2	FGDPLGYEDVIPEADREGVIR	1	1	2347.16	783.056	-1.54	2			0.00165393	1		1			K.FGDPLGYEDVIPEADREGVIR.Y	[262-282]	Not Used	Not Used
	P11215	Integrin alpha-M OS=Homo sapiens OX=9606 GN=ITGAM PE=1 SV=2	GFGQSVVQLQGSR	2	0	1362.71	681.86	-0.39	31	30.96		0.00165393	1		1	802954	1	R.GFGQSVVQLQGSR.V	[33-45]	Used	Used
	P11215	Integrin alpha-M OS=Homo sapiens OX=9606 GN=ITGAM PE=1 SV=2	VCLHVQK	2	0	883.482	442.244	-0.91	21	17.78	1xCarbamidomethyl [C2]	0.00767435	1		1	3637125	1	R.VCLHVQK.S	[653-659]	Used	Used
P24158	Myeloblastin OS=Homo sapiens OX=9606 GN=PRTN3 PE=1 SV=3	8	256	27.8	8.35	0	115	1	2	2	5	1.07711e+07	2	0.00141764
	Master Protein Accessions	Master Protein Descriptions	Sequence	# PSMs	# Missed Cleavages	Theo. MH+ [Da]	m/z [Da] (by Search Engine): Mascot	DeltaM [ppm] (by Search Engine): Mascot	Ions Score (by Search Engine): Mascot	Top Apex RT [min]	Modifications	Qvality q-value	# Proteins		# Protein Groups	Abundance: F1764: n/a, Sample, n/a, n/a	Abundances Count: F1764: n/a, Sample, n/a, n/a	Sequence in Protein	Positions in Proteins	Quan Usage	Quan Ratio Usage
	P24158	Myeloblastin OS=Homo sapiens OX=9606 GN=PRTN3 PE=1 SV=3	LVNVVLGAHNVR	3	0	1290.76	645.886	0.02	58	28.57		0.00165393	1		1	1.06051e+07	2	R.LVNVVLGAHNVR.T	[80-91]	Used	Used
	P24158	Myeloblastin OS=Homo sapiens OX=9606 GN=PRTN3 PE=1 SV=3	VALYVDWIR	2	0	1134.63	567.82	1.01	21	49.03		0.00165393	1		1	166013	1	R.VALYVDWIR.S	[236-244]	Used	Used
P14618	Pyruvate kinase PKM OS=Homo sapiens OX=9606 GN=PKM PE=1 SV=4	27	531	57.9	7.84	0	444	1	9	9	16	1.07429e+07	6	0.00453643
	Master Protein Accessions	Master Protein Descriptions	Sequence	# PSMs	# Missed Cleavages	Theo. MH+ [Da]	m/z [Da] (by Search Engine): Mascot	DeltaM [ppm] (by Search Engine): Mascot	Ions Score (by Search Engine): Mascot	Top Apex RT [min]	Modifications	Qvality q-value	# Proteins		# Protein Groups	Abundance: F1764: n/a, Sample, n/a, n/a	Abundances Count: F1764: n/a, Sample, n/a, n/a	Sequence in Protein	Positions in Proteins	Quan Usage	Quan Ratio Usage
	P14618	Pyruvate kinase PKM OS=Homo sapiens OX=9606 GN=PKM PE=1 SV=4	NTGIICTIGPASR	2	0	1359.7	680.356	-0.09	51	30.29	1xCarbamidomethyl [C6]	0.00165393	1		1	1.31752e+06	1	R.NTGIICTIGPASR.S	[44-56]	Used	Used
	P14618	Pyruvate kinase PKM OS=Homo sapiens OX=9606 GN=PKM PE=1 SV=4	FGVEQDVDMVFASFIR	2	0	1859.9	930.453	-0.01	88	63.53		0.00165393	1		1	193275	2	K.FGVEQDVDMVFASFIR.K	[231-246]	Used	Used
	P14618	Pyruvate kinase PKM OS=Homo sapiens OX=9606 GN=PKM PE=1 SV=4	FGVEQDVDMVFASFIR	2	0	1875.89	938.451	-0.24	83		1xOxidation [M9]	0.00165393	1		1			K.FGVEQDVDMVFASFIR.K	[231-246]	Not Used	Not Used
	P14618	Pyruvate kinase PKM OS=Homo sapiens OX=9606 GN=PKM PE=1 SV=4	GADFLVTEVENGGSLGSK	1	0	1779.88	890.438	-4.39	31			0.00165393	1		1			K.GADFLVTEVENGGSLGSK.K	[189-206]	Not Used	Not Used
	P14618	Pyruvate kinase PKM OS=Homo sapiens OX=9606 GN=PKM PE=1 SV=4	AEGSDVANAVLDGADCIMLSGETAKGDYPLEAVR	1	1	3494.64	1165.55	-2.26	31		1xCarbamidomethyl [C16]	0.00165393	1		1			R.AEGSDVANAVLDGADCIMLSGETAKGDYPLEAVR.M	[343-376]	Not Used	Not Used
	P14618	Pyruvate kinase PKM OS=Homo sapiens OX=9606 GN=PKM PE=1 SV=4	LDIDSPPITAR	2	0	1197.65	599.328	0.56	51	31.26		0.00165393	1		1	954163	1	R.LDIDSPPITAR.N	[33-43]	Used	Used
	P14618	Pyruvate kinase PKM OS=Homo sapiens OX=9606 GN=PKM PE=1 SV=4	IENHEGVR	2	0	953.48	477.244	-0.08	44	15.18		0.0024483	1		1	1.42366e+06	1	K.IENHEGVR.R	[271-278]	Used	Used
	P14618	Pyruvate kinase PKM OS=Homo sapiens OX=9606 GN=PKM PE=1 SV=4	SVETLKEMIK	2	1	1177.65	589.329	0.48	31	31.52		0.0024483	1		1	6607152	1	R.SVETLKEMIK.S	[57-66]	Used	Used
	P14618	Pyruvate kinase PKM OS=Homo sapiens OX=9606 GN=PKM PE=1 SV=4	AGKPVICATQMLESMIK	1	0	1876.97	626.328	-0.21	15		1xCarbamidomethyl [C7]	0.00411958	1		1			R.AGKPVICATQMLESMIK.K	[320-336]	Not Used	Not Used
	P14618	Pyruvate kinase PKM OS=Homo sapiens OX=9606 GN=PKM PE=1 SV=4	RFDEILEASDGIMVAR	1	1	1821.92	911.461	-0.54	23	44.65		0.00456775	1		1	247104	1	R.RFDEILEASDGIMVAR.G	[279-294]	Used	Used
P21333	Filamin-A OS=Homo sapiens OX=9606 GN=FLNA PE=1 SV=4	7	2647	280.6	6.06	0	350	1	12	12	21	1.03565e+07	11	0.00595407
	Master Protein Accessions	Master Protein Descriptions	Sequence	# PSMs	# Missed Cleavages	Theo. MH+ [Da]	m/z [Da] (by Search Engine): Mascot	DeltaM [ppm] (by Search Engine): Mascot	Ions Score (by Search Engine): Mascot	Top Apex RT [min]	Modifications	Qvality q-value	# Proteins		# Protein Groups	Abundance: F1764: n/a, Sample, n/a, n/a	Abundances Count: F1764: n/a, Sample, n/a, n/a	Sequence in Protein	Positions in Proteins	Quan Usage	Quan Ratio Usage
	P21333	Filamin-A OS=Homo sapiens OX=9606 GN=FLNA PE=1 SV=4	LSPFMADIRDAPQDFHPDR	2	1	2228.06	743.357	0.57	34	41.81		0.00165393	1		1	521192	1	R.LSPFMADIRDAPQDFHPDR.V	[656-674]	Used	Used
	P21333	Filamin-A OS=Homo sapiens OX=9606 GN=FLNA PE=1 SV=4	IECDDKGDGSCDVR	1	1	1625.65	813.33	-0.01	35	15.8	2xCarbamidomethyl [C3; C11]	0.00165393	2		1	219239	1	K.IECDDKGDGSCDVR.Y	[621-634]	Used	Used
	P21333	Filamin-A OS=Homo sapiens OX=9606 GN=FLNA PE=1 SV=4	TGVAVNKPAEFTVDAK	4	0	1646.87	823.941	0.41	65	27.02		0.00165393	1		1	2.12506e+06	2	K.TGVAVNKPAEFTVDAK.H	[685-700]	Used	Used
	P21333	Filamin-A OS=Homo sapiens OX=9606 GN=FLNA PE=1 SV=4	GKLDVQFSGLTK	2	1	1292.72	646.864	-0.29	36	32.78		0.00165393	1		1	478099	1	K.GKLDVQFSGLTK.G	[905-916]	Used	Used
	P21333	Filamin-A OS=Homo sapiens OX=9606 GN=FLNA PE=1 SV=4	GAGTGGLGLAVEGPSEAK	1	0	1570.81	785.908	0.55	27	30.83		0.00165393	1		1	509914	1	R.GAGTGGLGLAVEGPSEAK.M	[1382-1399]	Used	Used
	P21333	Filamin-A OS=Homo sapiens OX=9606 GN=FLNA PE=1 SV=4	AGNNMLLVGVHGPR	2	0	1434.76	717.885	-0.39	51	31.96		0.00165393	1		1	610152	1	K.AGNNMLLVGVHGPR.T	[2585-2598]	Used	Used
	P21333	Filamin-A OS=Homo sapiens OX=9606 GN=FLNA PE=1 SV=4	IVGPSGAAVPCKVEPGLGADNSVVR	1	1	2449.29	817.101	0.36	17		1xCarbamidomethyl [C11]	0.0024483	1		1			K.IVGPSGAAVPCKVEPGLGADNSVVR.F	[1008-1032]	Not Used	Not Used
	P21333	Filamin-A OS=Homo sapiens OX=9606 GN=FLNA PE=1 SV=4	AWGPGLEGGVVGK	1	0	1226.65	613.83	-0.13	41	34.06		0.00411958	1		1	569596	1	R.AWGPGLEGGVVGK.S	[581-593]	Used	Used
	P21333	Filamin-A OS=Homo sapiens OX=9606 GN=FLNA PE=1 SV=4	VDVGKDQEFTVK	1	1	1364.71	682.857	0.61	34	23.68		0.00411958	1		1	315276	1	K.VDVGKDQEFTVK.S	[983-994]	Used	Used
	P21333	Filamin-A OS=Homo sapiens OX=9606 GN=FLNA PE=1 SV=4	TPCEEILVK	2	0	1088.57	544.787	0.18	25	26.98	1xCarbamidomethyl [C3]	0.00456775	1		1	353551	1	R.TPCEEILVK.H	[2599-2607]	Used	Used
	P21333	Filamin-A OS=Homo sapiens OX=9606 GN=FLNA PE=1 SV=4	ALTQTGGPHVK	2	0	1108.61	554.809	-0.52	42	16.67		0.00456775	1		1	3953372	1	R.ALTQTGGPHVK.A	[1284-1294]	Used	Used
	P21333	Filamin-A OS=Homo sapiens OX=9606 GN=FLNA PE=1 SV=4	VNVGAGSHPNK	2	0	1079.56	540.283	-0.3	26	15.34		0.00608856	1		1	701024	1	R.VNVGAGSHPNK.V	[761-771]	Used	Used
P06396	Gelsolin OS=Homo sapiens OX=9606 GN=GSN PE=1 SV=1	16	782	85.6	6.28	0	348	1	8	8	14	1.03558e+07	7	0.00396938
	Master Protein Accessions	Master Protein Descriptions	Sequence	# PSMs	# Missed Cleavages	Theo. MH+ [Da]	m/z [Da] (by Search Engine): Mascot	DeltaM [ppm] (by Search Engine): Mascot	Ions Score (by Search Engine): Mascot	Top Apex RT [min]	Modifications	Qvality q-value	# Proteins		# Protein Groups	Abundance: F1764: n/a, Sample, n/a, n/a	Abundances Count: F1764: n/a, Sample, n/a, n/a	Sequence in Protein	Positions in Proteins	Quan Usage	Quan Ratio Usage
	P06396	Gelsolin OS=Homo sapiens OX=9606 GN=GSN PE=1 SV=1	SEDCFILDHGK	1	0	1320.59	660.798	-0.36	35	27.6	1xCarbamidomethyl [C4]	0.00165393	1		1	297918	1	K.SEDCFILDHGK.D	[328-338]	Used	Used
	P06396	Gelsolin OS=Homo sapiens OX=9606 GN=GSN PE=1 SV=1	QTQVSVLPEGGETPLFK	2	0	1829.96	915.486	0.3	54	43.21		0.00165393	1		1	508673	1	K.QTQVSVLPEGGETPLFK.Q	[374-390]	Used	Used
	P06396	Gelsolin OS=Homo sapiens OX=9606 GN=GSN PE=1 SV=1	TPSAAYLWVGTGASEAEKTGAQELLR	2	1	2706.37	902.794	-2.36	60	50.42		0.00165393	1		1	692731	1	K.TPSAAYLWVGTGASEAEKTGAQELLR.V	[598-623]	Used	Used
	P06396	Gelsolin OS=Homo sapiens OX=9606 GN=GSN PE=1 SV=1	AQPVQVAEGSEPDGFWEALGGK	2	0	2272.09	1136.55	1.44	55	49.8		0.00165393	1		1	163108	1	R.AQPVQVAEGSEPDGFWEALGGK.A	[627-648]	Used	Used
	P06396	Gelsolin OS=Homo sapiens OX=9606 GN=GSN PE=1 SV=1	DSQEEEKTEALTSAK	1	1	1665.78	833.395	0.31	47			0.00165393	1		1			K.DSQEEEKTEALTSAK.R	[714-728]	Not Used	Not Used
	P06396	Gelsolin OS=Homo sapiens OX=9606 GN=GSN PE=1 SV=1	AGKEPGLQIWR	2	1	1254.7	627.851	0.22	25	33.28		0.00165393	1		1	5872809	1	K.AGKEPGLQIWR.V	[62-72]	Used	Used
	P06396	Gelsolin OS=Homo sapiens OX=9606 GN=GSN PE=1 SV=1	AGALNSNDAFVLK	2	0	1319.7	660.351	-1.12	61	35.45		0.00165393	1		1	1204124	1	K.AGALNSNDAFVLK.T	[585-597]	Used	Used
	P06396	Gelsolin OS=Homo sapiens OX=9606 GN=GSN PE=1 SV=1	LKATQVSK	2	1	874.536	437.771	-0.23	22	15.37		0.0024483	1		1	1.61642e+06	1	R.LKATQVSK.G	[238-245]	Used	Used
P52209	6-phosphogluconate dehydrogenase, decarboxylating OS=Homo sapiens OX=9606 GN=PGD PE=1 SV=3	21	483	53.1	7.23	0	369	1	6	6	14	1.00973e+07	6	0.00396938
	Master Protein Accessions	Master Protein Descriptions	Sequence	# PSMs	# Missed Cleavages	Theo. MH+ [Da]	m/z [Da] (by Search Engine): Mascot	DeltaM [ppm] (by Search Engine): Mascot	Ions Score (by Search Engine): Mascot	Top Apex RT [min]	Modifications	Qvality q-value	# Proteins		# Protein Groups	Abundance: F1764: n/a, Sample, n/a, n/a	Abundances Count: F1764: n/a, Sample, n/a, n/a	Sequence in Protein	Positions in Proteins	Quan Usage	Quan Ratio Usage
	P52209	6-phosphogluconate dehydrogenase, decarboxylating OS=Homo sapiens OX=9606 GN=PGD PE=1 SV=3	LVPLLDTGDIIIDGGNSEYRDTTRR	2	2	2789.44	930.485	-0.37	24	48.8		0.00165393	1		1	1.08275e+06	1	K.LVPLLDTGDIIIDGGNSEYRDTTRR.C	[88-112]	Used	Used
	P52209	6-phosphogluconate dehydrogenase, decarboxylating OS=Homo sapiens OX=9606 GN=PGD PE=1 SV=3	VGTGEPCCDWVGDEGAGHFVK	4	0	2276.97	759.661	-0.11	51	34.01	2xCarbamidomethyl [C7; C8]	0.00165393	1		1	1.68974e+06	2	K.VGTGEPCCDWVGDEGAGHFVK.M	[164-184]	Used	Used
	P52209	6-phosphogluconate dehydrogenase, decarboxylating OS=Homo sapiens OX=9606 GN=PGD PE=1 SV=3	VVGAQSLKEMVSK	1	1	1375.76	688.385	0.31	56	30.29		0.00165393	1		1	1.64104e+06	1	K.VVGAQSLKEMVSK.L	[52-64]	Used	Used
	P52209	6-phosphogluconate dehydrogenase, decarboxylating OS=Homo sapiens OX=9606 GN=PGD PE=1 SV=3	TVSKVDDFLANEAK	3	1	1536.79	768.899	0.17	62	31.16		0.00165393	1		1	2.57497e+06	2	R.TVSKVDDFLANEAK.G	[35-48]	Used	Used
	P52209	6-phosphogluconate dehydrogenase, decarboxylating OS=Homo sapiens OX=9606 GN=PGD PE=1 SV=3	GILFVGSGVSGGEEGAR	2	0	1591.81	796.407	0.11	80	38.34		0.00165393	1		1	738220	1	K.GILFVGSGVSGGEEGAR.Y	[120-136]	Used	Used
	P52209	6-phosphogluconate dehydrogenase, decarboxylating OS=Homo sapiens OX=9606 GN=PGD PE=1 SV=3	AGQAVDDFIEK	2	0	1192.58	596.796	-0.48	22	29.5		0.00411958	1		1	2.37059e+06	1	K.AGQAVDDFIEK.L	[77-87]	Used	Used
P06733	Alpha-enolase OS=Homo sapiens OX=9606 GN=ENO1 PE=1 SV=2	32	434	47.1	7.39	0	595	1	10	10	22	9.68497e+06	8	0.0062376
	Master Protein Accessions	Master Protein Descriptions	Sequence	# PSMs	# Missed Cleavages	Theo. MH+ [Da]	m/z [Da] (by Search Engine): Mascot	DeltaM [ppm] (by Search Engine): Mascot	Ions Score (by Search Engine): Mascot	Top Apex RT [min]	Modifications	Qvality q-value	# Proteins		# Protein Groups	Abundance: F1764: n/a, Sample, n/a, n/a	Abundances Count: F1764: n/a, Sample, n/a, n/a	Sequence in Protein	Positions in Proteins	Quan Usage	Quan Ratio Usage
	P06733	Alpha-enolase OS=Homo sapiens OX=9606 GN=ENO1 PE=1 SV=2	SFIKDYPVVSIEDPFDQDDWGAWQK	2	1	2985.39	995.802	-0.54	51			0.00165393	1		1			K.SFIKDYPVVSIEDPFDQDDWGAWQK.F	[282-306]	Not Used	Not Used
	P06733	Alpha-enolase OS=Homo sapiens OX=9606 GN=ENO1 PE=1 SV=2	SGETEDTFIADLVVGLCTGQIK	2	0	2353.16	1177.09	2.22	60		1xCarbamidomethyl [C17]	0.00165393	3		1			R.SGETEDTFIADLVVGLCTGQIK.T	[373-394]	Not Used	Not Used
	P06733	Alpha-enolase OS=Homo sapiens OX=9606 GN=ENO1 PE=1 SV=2	SGKYDLDFKSPDDPSR	3	2	1826.86	913.931	0.03	68	26.99		0.00165393	1		1	1.37278e+06	1	R.SGKYDLDFKSPDDPSR.Y	[254-269]	Used	Used
	P06733	Alpha-enolase OS=Homo sapiens OX=9606 GN=ENO1 PE=1 SV=2	LNVTEQEKIDKLMIEMDGTENK	2	2	2578.27	860.097	0.98	31	41.71		0.00165393	1		1	460209	1	K.LNVTEQEKIDKLMIEMDGTENK.S	[82-103]	Used	Used
	P06733	Alpha-enolase OS=Homo sapiens OX=9606 GN=ENO1 PE=1 SV=2	YGKDATNVGDEGGFAPNILENKEGLELLK	4	2	3091.56	773.645	0.11	29	47.92		0.00165393	1		1	1.47509e+06	2	K.YGKDATNVGDEGGFAPNILENKEGLELLK.T	[200-228]	Used	Used
	P06733	Alpha-enolase OS=Homo sapiens OX=9606 GN=ENO1 PE=1 SV=2	YISPDQLADLYK	2	0	1425.73	713.367	-0.12	46	43.26		0.00165393	1		1	2.16132e+06	1	R.YISPDQLADLYK.S	[270-281]	Used	Used
	P06733	Alpha-enolase OS=Homo sapiens OX=9606 GN=ENO1 PE=1 SV=2	DATNVGDEGGFAPNILENKEGLELLK	2	1	2743.38	915.131	0.18	72	50.67		0.00165393	1		1	486009	1	K.DATNVGDEGGFAPNILENKEGLELLK.T	[203-228]	Used	Used
	P06733	Alpha-enolase OS=Homo sapiens OX=9606 GN=ENO1 PE=1 SV=2	GNPTVEVDLFTSK	2	0	1406.72	703.862	0.73	56	40.04		0.00165393	1		1	835914	1	R.GNPTVEVDLFTSK.G	[16-28]	Used	Used
	P06733	Alpha-enolase OS=Homo sapiens OX=9606 GN=ENO1 PE=1 SV=2	LMIEMDGTENK	1	0	1280.59	640.798	1.44	11	30.53		0.00411958	1		1	561030	1	K.LMIEMDGTENK.S	[93-103]	Used	Used
	P06733	Alpha-enolase OS=Homo sapiens OX=9606 GN=ENO1 PE=1 SV=2	YDLDFKSPDDPSR	2	1	1554.71	777.857	0	32	30.05		0.00456775	1		1	2.33261e+06	1	K.YDLDFKSPDDPSR.Y	[257-269]	Used	Used
O15143	Actin-related protein 2/3 complex subunit 1B OS=Homo sapiens OX=9606 GN=ARPC1B PE=1 SV=3	11	372	40.9	8.35	0	214	1	4	4	9	9.45418e+06	3	0.00255174
	Master Protein Accessions	Master Protein Descriptions	Sequence	# PSMs	# Missed Cleavages	Theo. MH+ [Da]	m/z [Da] (by Search Engine): Mascot	DeltaM [ppm] (by Search Engine): Mascot	Ions Score (by Search Engine): Mascot	Top Apex RT [min]	Modifications	Qvality q-value	# Proteins		# Protein Groups	Abundance: F1764: n/a, Sample, n/a, n/a	Abundances Count: F1764: n/a, Sample, n/a, n/a	Sequence in Protein	Positions in Proteins	Quan Usage	Quan Ratio Usage
	O15143	Actin-related protein 2/3 complex subunit 1B OS=Homo sapiens OX=9606 GN=ARPC1B PE=1 SV=3	NSVSQISVLSGGK	1	0	1275.69	638.349	0.31	44	29.82		0.00165393	1		1	1.04109e+06	1	K.NSVSQISVLSGGK.A	[327-339]	Used	Used
	O15143	Actin-related protein 2/3 complex subunit 1B OS=Homo sapiens OX=9606 GN=ARPC1B PE=1 SV=3	ASSEGGTAAGAGLDSLHK	5	0	1628.79	814.897	-0.88	90	21.91		0.00165393	1		1	4.8771e+06	2	K.ASSEGGTAAGAGLDSLHK.N	[309-326]	Used	Used
	O15143	Actin-related protein 2/3 complex subunit 1B OS=Homo sapiens OX=9606 GN=ARPC1B PE=1 SV=3	ASSEGGTAAGAGLDSLHKNSVSQISVLSGGK	1	1	2885.46	962.49	-1.11	23			0.00411958	1		1			K.ASSEGGTAAGAGLDSLHKNSVSQISVLSGGK.A	[309-339]	Not Used	Not Used
	O15143	Actin-related protein 2/3 complex subunit 1B OS=Homo sapiens OX=9606 GN=ARPC1B PE=1 SV=3	SLESALKDLK	2	1	1103.63	552.319	-0.15	24	36.26		0.00456775	1		1	3.536e+06	1	K.SLESALKDLK.I	[361-370]	Used	Used
P61769	Beta-2-microglobulin OS=Homo sapiens OX=9606 GN=B2M PE=1 SV=1	27	119	13.7	6.52	0	98	1	2	2	4	9329469	1	0.00113411
	Master Protein Accessions	Master Protein Descriptions	Sequence	# PSMs	# Missed Cleavages	Theo. MH+ [Da]	m/z [Da] (by Search Engine): Mascot	DeltaM [ppm] (by Search Engine): Mascot	Ions Score (by Search Engine): Mascot	Top Apex RT [min]	Modifications	Qvality q-value	# Proteins		# Protein Groups	Abundance: F1764: n/a, Sample, n/a, n/a	Abundances Count: F1764: n/a, Sample, n/a, n/a	Sequence in Protein	Positions in Proteins	Quan Usage	Quan Ratio Usage
	P61769	Beta-2-microglobulin OS=Homo sapiens OX=9606 GN=B2M PE=1 SV=1	VNHVTLSQPK	3	0	1122.63	561.817	-0.04	53	17.99		0.00165393	1		1	9329469	1	R.VNHVTLSQPK.I	[102-111]	Used	Used
	P61769	Beta-2-microglobulin OS=Homo sapiens OX=9606 GN=B2M PE=1 SV=1	SNFLNCYVSGFHPSDIEVDLLK	1	0	2554.23	852.081	-0.05	29		1xCarbamidomethyl [C6]	0.00165393	1		1			K.SNFLNCYVSGFHPSDIEVDLLK.N	[40-61]	Not Used	Not Used
Q9HD89	Resistin OS=Homo sapiens OX=9606 GN=RETN PE=1 SV=1	59	108	11.4	6.86	0	338	1	4	4	11	8.8907e+06	4	0.0031188
	Master Protein Accessions	Master Protein Descriptions	Sequence	# PSMs	# Missed Cleavages	Theo. MH+ [Da]	m/z [Da] (by Search Engine): Mascot	DeltaM [ppm] (by Search Engine): Mascot	Ions Score (by Search Engine): Mascot	Top Apex RT [min]	Modifications	Qvality q-value	# Proteins		# Protein Groups	Abundance: F1764: n/a, Sample, n/a, n/a	Abundances Count: F1764: n/a, Sample, n/a, n/a	Sequence in Protein	Positions in Proteins	Quan Usage	Quan Ratio Usage
	Q9HD89	Resistin OS=Homo sapiens OX=9606 GN=RETN PE=1 SV=1	IQEVAGSLIFR	4	0	1232.7	616.853	-0.42	76	41.16		0.00165393	1		1	6155199	1	R.IQEVAGSLIFR.A	[32-42]	Used	Used
	Q9HD89	Resistin OS=Homo sapiens OX=9606 GN=RETN PE=1 SV=1	TLCSMEEAINER	2	0	1452.65	726.826	-0.18	49	33.88	1xCarbamidomethyl [C3]	0.00165393	1		1	1.04365e+06	1	K.TLCSMEEAINER.I	[20-31]	Used	Used
	Q9HD89	Resistin OS=Homo sapiens OX=9606 GN=RETN PE=1 SV=1	AISSIGLECQSVTSRGDLATCPR	1	1	2478.21	826.741	0.96	44		2xCarbamidomethyl [C9; C21]	0.00165393	1		1			R.AISSIGLECQSVTSRGDLATCPR.G	[43-65]	Not Used	Not Used
	Q9HD89	Resistin OS=Homo sapiens OX=9606 GN=RETN PE=1 SV=1	AETTCHCQCAGMDWTGAR	2	0	2111.82	1056.41	0.12	61	24.77	3xCarbamidomethyl [C5; C7; C9]	0.00165393	1		1	1.2942e+06	1	R.AETTCHCQCAGMDWTGAR.C	[85-102]	Used	Used
	Q9HD89	Resistin OS=Homo sapiens OX=9606 GN=RETN PE=1 SV=1	AETTCHCQCAGMDWTGAR	2	0	2127.81	709.94	-1.66	23	19.63	3xCarbamidomethyl [C5; C7; C9]; 1xOxidation [M12]	0.00165393	1		1	397654	1	R.AETTCHCQCAGMDWTGAR.C	[85-102]	Used	Used
P02768	Albumin OS=Homo sapiens OX=9606 GN=ALB PE=1 SV=2	30	609	69.3	6.28	0	837	1	13	13	39	8.76457e+06	9	0.0110576
	Master Protein Accessions	Master Protein Descriptions	Sequence	# PSMs	# Missed Cleavages	Theo. MH+ [Da]	m/z [Da] (by Search Engine): Mascot	DeltaM [ppm] (by Search Engine): Mascot	Ions Score (by Search Engine): Mascot	Top Apex RT [min]	Modifications	Qvality q-value	# Proteins		# Protein Groups	Abundance: F1764: n/a, Sample, n/a, n/a	Abundances Count: F1764: n/a, Sample, n/a, n/a	Sequence in Protein	Positions in Proteins	Quan Usage	Quan Ratio Usage
	P02768	Albumin OS=Homo sapiens OX=9606 GN=ALB PE=1 SV=2	NYAEAKDVFLGMFLYEYAR	1	1	2300.11	767.372	-1.23	22			0.00165393	1		1			K.NYAEAKDVFLGMFLYEYAR.R	[342-360]	Not Used	Not Used
	P02768	Albumin OS=Homo sapiens OX=9606 GN=ALB PE=1 SV=2	MPCAEDYLSVVLNQLCVLHEK	1	0	2534.21	845.408	0.15	40		2xCarbamidomethyl [C3; C16]; 1xOxidation [M1]	0.00165393	1		1			R.MPCAEDYLSVVLNQLCVLHEK.T	[470-490]	Not Used	Not Used
	P02768	Albumin OS=Homo sapiens OX=9606 GN=ALB PE=1 SV=2	SHCIAEVENDEMPADLPSLAADFVESK	1	0	2974.34	992.12	0.58	15		1xCarbamidomethyl [C3]	0.00165393	1		1			K.SHCIAEVENDEMPADLPSLAADFVESK.D	[311-337]	Not Used	Not Used
	P02768	Albumin OS=Homo sapiens OX=9606 GN=ALB PE=1 SV=2	RHPYFYAPELLFFAK	2	1	1899	633.669	-1.36	24	54.7		0.00165393	1		1	157107	1	R.RHPYFYAPELLFFAK.R	[169-183]	Used	Used
	P02768	Albumin OS=Homo sapiens OX=9606 GN=ALB PE=1 SV=2	RMPCAEDYLSVVLNQLCVLHEK	2	1	2674.31	892.106	-4.78	28	59.36	2xCarbamidomethyl [C4; C17]	0.00165393	1		1	86657.9	1	K.RMPCAEDYLSVVLNQLCVLHEK.T	[469-490]	Used	Used
	P02768	Albumin OS=Homo sapiens OX=9606 GN=ALB PE=1 SV=2	RMPCAEDYLSVVLNQLCVLHEK	2	1	2690.31	897.442	0.33	45		2xCarbamidomethyl [C4; C17]; 1xOxidation [M2]	0.00165393	1		1			K.RMPCAEDYLSVVLNQLCVLHEK.T	[469-490]	Not Used	Not Used
	P02768	Albumin OS=Homo sapiens OX=9606 GN=ALB PE=1 SV=2	VFDEFKPLVEEPQNLIK	2	0	2045.1	1023.05	0.11	45			0.00165393	1		1			K.VFDEFKPLVEEPQNLIK.Q	[397-413]	Not Used	Not Used
	P02768	Albumin OS=Homo sapiens OX=9606 GN=ALB PE=1 SV=2	YICENQDSISSK	2	0	1443.64	722.325	0.26	35	19.32	1xCarbamidomethyl [C3]	0.00165393	1		1	291009	1	K.YICENQDSISSK.L	[287-298]	Used	Used
	P02768	Albumin OS=Homo sapiens OX=9606 GN=ALB PE=1 SV=2	ALVLIAFAQYLQQCPFEDHVK	8	0	2490.28	830.766	-1.09	32	61.58	1xCarbamidomethyl [C14]	0.00165393	1		1	2.08799e+06	1	K.ALVLIAFAQYLQQCPFEDHVK.L	[45-65]	Used	Used
	P02768	Albumin OS=Homo sapiens OX=9606 GN=ALB PE=1 SV=2	EFNAETFTFHADICTLSEK	1	0	2260.02	1130.51	-0.94	69		1xCarbamidomethyl [C14]	0.00165393	1		1			K.EFNAETFTFHADICTLSEK.E	[525-543]	Not Used	Not Used
	P02768	Albumin OS=Homo sapiens OX=9606 GN=ALB PE=1 SV=2	EFNAETFTFHADICTLSEKER	1	1	2545.17	849.058	-2.38	31	43.83	1xCarbamidomethyl [C14]	0.00165393	1		1	298048	1	K.EFNAETFTFHADICTLSEKER.Q	[525-545]	Used	Used
	P02768	Albumin OS=Homo sapiens OX=9606 GN=ALB PE=1 SV=2	DVFLGMFLYEYAR	9	0	1623.79	812.398	0.5	49	61.04		0.00165393	1		1	3.573e+06	1	K.DVFLGMFLYEYAR.R	[348-360]	Used	Used
	P02768	Albumin OS=Homo sapiens OX=9606 GN=ALB PE=1 SV=2	DVFLGMFLYEYAR	2	0	1639.78	820.395	0.2	53	57.57	1xOxidation [M6]	0.00165393	1		1	1.2584e+06	1	K.DVFLGMFLYEYAR.R	[348-360]	Used	Used
	P02768	Albumin OS=Homo sapiens OX=9606 GN=ALB PE=1 SV=2	KVPQVSTPTLVEVSR	2	1	1639.94	547.318	0.41	44	31.92		0.00165393	1		1	658085	1	K.KVPQVSTPTLVEVSR.N	[438-452]	Used	Used
	P02768	Albumin OS=Homo sapiens OX=9606 GN=ALB PE=1 SV=2	AVMDDFAAFVEK	1	0	1342.63	671.821	-0.04	33	48.75		0.0024483	1		1	354279	1	K.AVMDDFAAFVEK.C	[570-581]	Used	Used
	P02768	Albumin OS=Homo sapiens OX=9606 GN=ALB PE=1 SV=2	MPCAEDYLSVVLNQLCVLHEK	2	0	2518.21	840.073	-3.33	18		2xCarbamidomethyl [C3; C16]	0.00411958	1		1			R.MPCAEDYLSVVLNQLCVLHEK.T	[470-490]	Not Used	Not Used
P31146	Coronin-1A OS=Homo sapiens OX=9606 GN=CORO1A PE=1 SV=4	17	461	51	6.68	0	187	1	6	6	11	8.42213e+06	5	0.0031188
	Master Protein Accessions	Master Protein Descriptions	Sequence	# PSMs	# Missed Cleavages	Theo. MH+ [Da]	m/z [Da] (by Search Engine): Mascot	DeltaM [ppm] (by Search Engine): Mascot	Ions Score (by Search Engine): Mascot	Top Apex RT [min]	Modifications	Qvality q-value	# Proteins		# Protein Groups	Abundance: F1764: n/a, Sample, n/a, n/a	Abundances Count: F1764: n/a, Sample, n/a, n/a	Sequence in Protein	Positions in Proteins	Quan Usage	Quan Ratio Usage
	P31146	Coronin-1A OS=Homo sapiens OX=9606 GN=CORO1A PE=1 SV=4	RAAPEASGTPSSDAVSRLEEEMR	1	2	2446.16	816.059	-0.67	17	37.49		0.00165393	1		1	313719	1	R.RAAPEASGTPSSDAVSRLEEEMR.K	[416-438]	Used	Used
	P31146	Coronin-1A OS=Homo sapiens OX=9606 GN=CORO1A PE=1 SV=4	VSQTTWDSGFCAVNPK	2	0	1796.83	898.917	-0.16	37	35.93	1xCarbamidomethyl [C11]	0.00165393	1		1	484777	1	R.VSQTTWDSGFCAVNPK.F	[30-45]	Used	Used
	P31146	Coronin-1A OS=Homo sapiens OX=9606 GN=CORO1A PE=1 SV=4	KLQATVQELQK	2	1	1285.75	643.377	-0.32	46	21.88		0.00165393	1		1	4.59702e+06	1	R.KLQATVQELQK.R	[439-449]	Used	Used
	P31146	Coronin-1A OS=Homo sapiens OX=9606 GN=CORO1A PE=1 SV=4	KSDLFQEDLYPPTAGPDPALTAEEWLGGR	2	1	3173.54	1058.52	0.16	37	56.25		0.00165393	1		1	1.52602e+06	1	R.KSDLFQEDLYPPTAGPDPALTAEEWLGGR.D	[355-383]	Used	Used
	P31146	Coronin-1A OS=Homo sapiens OX=9606 GN=CORO1A PE=1 SV=4	AAPEASGTPSSDAVSR	2	0	1502.71	751.858	1.04	33			0.00165393	1		1			R.AAPEASGTPSSDAVSR.L	[417-432]	Not Used	Not Used
	P31146	Coronin-1A OS=Homo sapiens OX=9606 GN=CORO1A PE=1 SV=4	AAPEASGTPSSDAVSRLEEEMR	2	1	2290.06	764.025	-0.69	20	39.85		0.00411958	1		1	1.50059e+06	1	R.AAPEASGTPSSDAVSRLEEEMR.K	[417-438]	Used	Used
P11142	Heat shock cognate 71 kDa protein OS=Homo sapiens OX=9606 GN=HSPA8 PE=1 SV=1	18	646	70.9	5.52	0	251	1	7	10	20	8.37476e+06	7	0.00567054
	Master Protein Accessions	Master Protein Descriptions	Sequence	# PSMs	# Missed Cleavages	Theo. MH+ [Da]	m/z [Da] (by Search Engine): Mascot	DeltaM [ppm] (by Search Engine): Mascot	Ions Score (by Search Engine): Mascot	Top Apex RT [min]	Modifications	Qvality q-value	# Proteins		# Protein Groups	Abundance: F1764: n/a, Sample, n/a, n/a	Abundances Count: F1764: n/a, Sample, n/a, n/a	Sequence in Protein	Positions in Proteins	Quan Usage	Quan Ratio Usage
	P11142	Heat shock cognate 71 kDa protein OS=Homo sapiens OX=9606 GN=HSPA8 PE=1 SV=1	MVNHFIAEFK	2	0	1235.62	618.315	-0.85	18	35.4		0.00165393	1		1	596431	1	R.MVNHFIAEFK.R	[237-246]	Used	Used
	P11142	Heat shock cognate 71 kDa protein OS=Homo sapiens OX=9606 GN=HSPA8 PE=1 SV=1	IINEPTAAAIAYGLDKK	2	1	1787.99	894.499	0.73	45	38.53		0.00165393	2		1	246791	1	R.IINEPTAAAIAYGLDKK.V	[172-188]	Used	Used
	P11142	Heat shock cognate 71 kDa protein OS=Homo sapiens OX=9606 GN=HSPA8 PE=1 SV=1	MKEIAEAYLGK	3	1	1252.66	626.834	0.78	26	28.35		0.00165393	1		1	2.91128e+06	1	K.MKEIAEAYLGK.T	[127-137]	Used	Used
	P11142; P11021; P0DMV8	Heat shock cognate 71 kDa protein OS=Homo sapiens OX=9606 GN=HSPA8 PE=1 SV=1 Endoplasmic reticulum chaperone BiP OS=Homo sapiens OX=9606 GN=HSPA5 PE=1 SV=2 Heat shock 70 kDa protein 1A OS=Homo sapiens OX=9606 GN=HSPA1A PE=1 SV=1	VEIIANDQGNR	2	0	1228.63	614.813	-8.24	26	20.73		0.00165393	5		3	529306	1	K.VEIIANDQGNR.T	[26-36]	Not Used	Not Used
	P11142; P0DMV8	Heat shock cognate 71 kDa protein OS=Homo sapiens OX=9606 GN=HSPA8 PE=1 SV=1 Heat shock 70 kDa protein 1A OS=Homo sapiens OX=9606 GN=HSPA1A PE=1 SV=1	TTPSYVAFTDTER	2	0	1487.7	744.355	0.95	39	31.67		0.00165393	6		2	855254	1	R.TTPSYVAFTDTER.L	[37-49]	Not Used	Not Used
	P11142	Heat shock cognate 71 kDa protein OS=Homo sapiens OX=9606 GN=HSPA8 PE=1 SV=1	DAGTIAGLNVLR	2	0	1199.67	600.341	0.17	35	40.23		0.00165393	1		1	552638	1	K.DAGTIAGLNVLR.I	[160-171]	Used	Used
	P11142	Heat shock cognate 71 kDa protein OS=Homo sapiens OX=9606 GN=HSPA8 PE=1 SV=1	STAGDTHLGGEDFDNR	1	0	1691.73	846.363	-3.74	58	21.99		0.0024483	2		1	271119	1	K.STAGDTHLGGEDFDNR.M	[221-236]	Used	Used
	P11142	Heat shock cognate 71 kDa protein OS=Homo sapiens OX=9606 GN=HSPA8 PE=1 SV=1	LSKEDIER	2	1	989.526	495.267	-0.2	24	17.11		0.0024483	1		1	1.63982e+06	1	R.LSKEDIER.M	[510-517]	Used	Used
	P11142	Heat shock cognate 71 kDa protein OS=Homo sapiens OX=9606 GN=HSPA8 PE=1 SV=1	VQVEYKGETK	2	1	1180.62	590.814	-0.78	37	16.93		0.00411958	2		1	2156686	1	K.VQVEYKGETK.S	[103-112]	Used	Used
	P11142; P0DMV8	Heat shock cognate 71 kDa protein OS=Homo sapiens OX=9606 GN=HSPA8 PE=1 SV=1 Heat shock 70 kDa protein 1A OS=Homo sapiens OX=9606 GN=HSPA1A PE=1 SV=1	ITITNDKGR	2	1	1017.57	509.289	1.01	24	16.66		0.00535372	5		2	3.11441e+06	1	K.ITITNDKGR.L	[501-509]	Not Used	Not Used
P26583	High mobility group protein B2 OS=Homo sapiens OX=9606 GN=HMGB2 PE=1 SV=2	13	209	24	7.81	0	156	1	3	3	10	8.27516e+06	3	0.00283527
	Master Protein Accessions	Master Protein Descriptions	Sequence	# PSMs	# Missed Cleavages	Theo. MH+ [Da]	m/z [Da] (by Search Engine): Mascot	DeltaM [ppm] (by Search Engine): Mascot	Ions Score (by Search Engine): Mascot	Top Apex RT [min]	Modifications	Qvality q-value	# Proteins		# Protein Groups	Abundance: F1764: n/a, Sample, n/a, n/a	Abundances Count: F1764: n/a, Sample, n/a, n/a	Sequence in Protein	Positions in Proteins	Quan Usage	Quan Ratio Usage
	P26583	High mobility group protein B2 OS=Homo sapiens OX=9606 GN=HMGB2 PE=1 SV=2	IKSEHPGLSIGDTAK	4	1	1552.83	776.919	-1.06	22	22.75		0.00165393	1		1	1.79703e+06	2	K.IKSEHPGLSIGDTAK.K	[113-127]	Used	Used
	P26583	High mobility group protein B2 OS=Homo sapiens OX=9606 GN=HMGB2 PE=1 SV=2	KLGEMWSEQSAK	2	1	1393.68	697.342	-0.55	41	26.06		0.00165393	1		1	1.03958e+06	1	K.KLGEMWSEQSAK.D	[128-139]	Used	Used
	P26583	High mobility group protein B2 OS=Homo sapiens OX=9606 GN=HMGB2 PE=1 SV=2	SEHPGLSIGDTAK	4	0	1311.65	656.33	-0.77	31	21.81		0.0024483	1		1	5438552	1	K.SEHPGLSIGDTAK.K	[115-127]	Used	Used
P00338	L-lactate dehydrogenase A chain OS=Homo sapiens OX=9606 GN=LDHA PE=1 SV=2	27	332	36.7	8.27	0	246	1	6	7	11	8.12459e+06	5	0.0031188
	Master Protein Accessions	Master Protein Descriptions	Sequence	# PSMs	# Missed Cleavages	Theo. MH+ [Da]	m/z [Da] (by Search Engine): Mascot	DeltaM [ppm] (by Search Engine): Mascot	Ions Score (by Search Engine): Mascot	Top Apex RT [min]	Modifications	Qvality q-value	# Proteins		# Protein Groups	Abundance: F1764: n/a, Sample, n/a, n/a	Abundances Count: F1764: n/a, Sample, n/a, n/a	Sequence in Protein	Positions in Proteins	Quan Usage	Quan Ratio Usage
	P00338	L-lactate dehydrogenase A chain OS=Homo sapiens OX=9606 GN=LDHA PE=1 SV=2	SADTLWGIQK	2	0	1118.58	559.796	0.19	48	34.88		0.00165393	1		1	4.20752e+06	1	K.SADTLWGIQK.E	[319-328]	Used	Used
	P00338	L-lactate dehydrogenase A chain OS=Homo sapiens OX=9606 GN=LDHA PE=1 SV=2	VTLTSEEEAR	2	0	1134.56	567.786	1.19	52	19.76		0.00165393	1		1	2005994	1	K.VTLTSEEEAR.L	[306-315]	Used	Used
	P00338	L-lactate dehydrogenase A chain OS=Homo sapiens OX=9606 GN=LDHA PE=1 SV=2	ATLKDQLIYNLLKEEQTPQNK	2	2	2529.36	843.79	-0.06	38	50.97	1xAcetyl [N-Term]	0.00165393	1		1	649051	1	M.ATLKDQLIYNLLKEEQTPQNK.I	[2-22]	Used	Used
	P00338	L-lactate dehydrogenase A chain OS=Homo sapiens OX=9606 GN=LDHA PE=1 SV=2	GEMMDLQHGSLFLR	1	0	1633.78	817.395	-0.14	51	43.43		0.00165393	1		1	200492	1	K.GEMMDLQHGSLFLR.T	[60-73]	Used	Used
	P00338	L-lactate dehydrogenase A chain OS=Homo sapiens OX=9606 GN=LDHA PE=1 SV=2	GYTSWAIGLSVADLAESIMK	1	0	2112.07	1056.54	1.94	53			0.00165393	1		1			K.GYTSWAIGLSVADLAESIMK.N	[246-265]	Not Used	Not Used
	P00338	L-lactate dehydrogenase A chain OS=Homo sapiens OX=9606 GN=LDHA PE=1 SV=2	KSADTLWGIQK	2	1	1246.68	623.843	0.01	30	30.52		0.0024483	1		1	1.06153e+06	1	K.KSADTLWGIQK.E	[318-328]	Used	Used
	P07195; P00338	L-lactate dehydrogenase B chain OS=Homo sapiens OX=9606 GN=LDHB PE=1 SV=2 L-lactate dehydrogenase A chain OS=Homo sapiens OX=9606 GN=LDHA PE=1 SV=2	VIGSGCNLDSAR	1	0	1248.6	624.804	0.49	16		1xCarbamidomethyl [C6]	0.00411958	4		2			R.VIGSGCNLDSAR.F	[158-169]	Not Used	Not Used
Q5QNW6	Histone H2B type 2-F OS=Homo sapiens OX=9606 GN=H2BC18 PE=1 SV=3	54	126	13.9	10.32	0	426	1	1	7	24	7.62027e+06	1	0.00680465
	Master Protein Accessions	Master Protein Descriptions	Sequence	# PSMs	# Missed Cleavages	Theo. MH+ [Da]	m/z [Da] (by Search Engine): Mascot	DeltaM [ppm] (by Search Engine): Mascot	Ions Score (by Search Engine): Mascot	Top Apex RT [min]	Modifications	Qvality q-value	# Proteins		# Protein Groups	Abundance: F1764: n/a, Sample, n/a, n/a	Abundances Count: F1764: n/a, Sample, n/a, n/a	Sequence in Protein	Positions in Proteins	Quan Usage	Quan Ratio Usage
	Q16778; Q5QNW6	Histone H2B type 2-E OS=Homo sapiens OX=9606 GN=H2BC21 PE=1 SV=3 Histone H2B type 2-F OS=Homo sapiens OX=9606 GN=H2BC18 PE=1 SV=3	AMGIMNSFVNDIFER	1	0	1775.81	888.408	-0.52	59		2xOxidation [M2; M5]	0.00165393	14		2			K.AMGIMNSFVNDIFER.I	[59-73]	Not Used	Not Used
	Q16778; Q5QNW6	Histone H2B type 2-E OS=Homo sapiens OX=9606 GN=H2BC21 PE=1 SV=3 Histone H2B type 2-F OS=Homo sapiens OX=9606 GN=H2BC18 PE=1 SV=3	AMGIMNSFVNDIFER	3	0	1759.81	880.41	-1.18	68	57.04	1xOxidation [M]	0.00165393	14		2	237443	1	K.AMGIMNSFVNDIFER.I	[59-73]	Not Used	Not Used
	Q16778; Q5QNW6	Histone H2B type 2-E OS=Homo sapiens OX=9606 GN=H2BC21 PE=1 SV=3 Histone H2B type 2-F OS=Homo sapiens OX=9606 GN=H2BC18 PE=1 SV=3	AMGIMNSFVNDIFER	2	0	1743.82	872.413	0.12	58	59.28		0.00165393	14		2	345265	1	K.AMGIMNSFVNDIFER.I	[59-73]	Not Used	Not Used
	Q16778; Q5QNW6	Histone H2B type 2-E OS=Homo sapiens OX=9606 GN=H2BC21 PE=1 SV=3 Histone H2B type 2-F OS=Homo sapiens OX=9606 GN=H2BC18 PE=1 SV=3	AVTKYTSSK	2	1	984.536	492.772	0.15	23	15.23		0.00165393	13		2	1.03106e+06	1	K.AVTKYTSSK.-	[118-126]	Not Used	Not Used
	Q5QNW6	Histone H2B type 2-F OS=Homo sapiens OX=9606 GN=H2BC18 PE=1 SV=3	KESYSVYVYK	4	1	1265.64	633.324	-0.15	54	25.14		0.00165393	9		1	7.62027e+06	1	R.KESYSVYVYK.V	[35-44]	Used	Used
	Q16778; Q5QNW6	Histone H2B type 2-E OS=Homo sapiens OX=9606 GN=H2BC21 PE=1 SV=3 Histone H2B type 2-F OS=Homo sapiens OX=9606 GN=H2BC18 PE=1 SV=3	VLKQVHPDTGISSK	2	1	1508.84	754.926	1.05	31	20.28		0.0024483	15		2	564947	1	K.VLKQVHPDTGISSK.A	[45-58]	Not Used	Not Used
	Q16778; Q5QNW6	Histone H2B type 2-E OS=Homo sapiens OX=9606 GN=H2BC21 PE=1 SV=3 Histone H2B type 2-F OS=Homo sapiens OX=9606 GN=H2BC18 PE=1 SV=3	QVHPDTGISSK	2	0	1168.6	584.801	-0.19	22	16.26		0.00456775	15		2	39858664	1	K.QVHPDTGISSK.A	[48-58]	Not Used	Not Used
	Q16778; Q5QNW6	Histone H2B type 2-E OS=Homo sapiens OX=9606 GN=H2BC21 PE=1 SV=3 Histone H2B type 2-F OS=Homo sapiens OX=9606 GN=H2BC18 PE=1 SV=3	LAHYNKR	7	1	901.5	451.254	0.52	15	29.83		0.00608856	15		2	5.65698e+06	4	R.LAHYNKR.S	[81-87]	Not Used	Not Used
	Q16778; Q5QNW6	Histone H2B type 2-E OS=Homo sapiens OX=9606 GN=H2BC21 PE=1 SV=3 Histone H2B type 2-F OS=Homo sapiens OX=9606 GN=H2BC18 PE=1 SV=3	STITSREIQTAVR	1	1	1461.8	731.404	-1.06	16	23.99		0.00608856	13		2	615481	1	R.STITSREIQTAVR.L	[88-100]	Not Used	Not Used
Q14764	Major vault protein OS=Homo sapiens OX=9606 GN=MVP PE=1 SV=4	16	893	99.3	5.48	0	300	1	11	11	17	7.344e+06	8	0.00481996
	Master Protein Accessions	Master Protein Descriptions	Sequence	# PSMs	# Missed Cleavages	Theo. MH+ [Da]	m/z [Da] (by Search Engine): Mascot	DeltaM [ppm] (by Search Engine): Mascot	Ions Score (by Search Engine): Mascot	Top Apex RT [min]	Modifications	Qvality q-value	# Proteins		# Protein Groups	Abundance: F1764: n/a, Sample, n/a, n/a	Abundances Count: F1764: n/a, Sample, n/a, n/a	Sequence in Protein	Positions in Proteins	Quan Usage	Quan Ratio Usage
	Q14764	Major vault protein OS=Homo sapiens OX=9606 GN=MVP PE=1 SV=4	QAIPLDENEGIYVQDVK	1	0	1930.98	965.993	1.09	24			0.00165393	1		1			R.QAIPLDENEGIYVQDVK.T	[378-394]	Not Used	Not Used
	Q14764	Major vault protein OS=Homo sapiens OX=9606 GN=MVP PE=1 SV=4	QKILDQSEAEK	2	1	1288.67	644.841	0.35	43	17.42		0.00165393	1		1	835224	1	R.QKILDQSEAEK.A	[691-701]	Used	Used
	Q14764	Major vault protein OS=Homo sapiens OX=9606 GN=MVP PE=1 SV=4	QMTEAIGPSTIRDLAVAGPEMQVK	2	1	2542.3	848.105	0.26	15	46.62		0.00165393	1		1	289633	1	K.QMTEAIGPSTIRDLAVAGPEMQVK.L	[797-820]	Used	Used
	Q14764	Major vault protein OS=Homo sapiens OX=9606 GN=MVP PE=1 SV=4	IEGEGSVLQAK	2	0	1130.61	565.806	0.04	54	22.44		0.00165393	1		1	1.72471e+06	1	R.IEGEGSVLQAK.L	[735-745]	Used	Used
	Q14764	Major vault protein OS=Homo sapiens OX=9606 GN=MVP PE=1 SV=4	LKAQALAIETEAELQR	2	1	1783.99	892.499	0.16	54	37.79		0.00165393	1		1	431915	1	K.LKAQALAIETEAELQR.V	[746-761]	Used	Used
	Q14764	Major vault protein OS=Homo sapiens OX=9606 GN=MVP PE=1 SV=4	VASGPSPGEGISPQSAQAPQAPGDNHVVPVLR	1	0	3119.59	1040.54	1.27	38			0.00165393	1		1			R.VASGPSPGEGISPQSAQAPQAPGDNHVVPVLR.-	[862-893]	Not Used	Not Used
	Q14764	Major vault protein OS=Homo sapiens OX=9606 GN=MVP PE=1 SV=4	FKQMTEAIGPSTIR	1	1	1578.83	789.919	-0.7	36	29.46		0.00165393	1		1	274666	1	K.FKQMTEAIGPSTIR.D	[795-808]	Used	Used
	Q14764	Major vault protein OS=Homo sapiens OX=9606 GN=MVP PE=1 SV=4	DLAVAGPEMQVK	2	0	1257.65	629.329	0.35	36	30.46		0.00165393	1		1	386976	1	R.DLAVAGPEMQVK.L	[809-820]	Used	Used
	Q14764	Major vault protein OS=Homo sapiens OX=9606 GN=MVP PE=1 SV=4	ELELVYAR	2	0	992.541	496.774	0.14	38	33.39		0.0024483	1		1	509767	1	R.ELELVYAR.A	[767-774]	Used	Used
	Q14764	Major vault protein OS=Homo sapiens OX=9606 GN=MVP PE=1 SV=4	VRELELVYAR	1	1	1247.71	624.359	-0.75	26	31.64		0.00456775	1		1	2.8911e+06	1	K.VRELELVYAR.A	[765-774]	Used	Used
	Q14764	Major vault protein OS=Homo sapiens OX=9606 GN=MVP PE=1 SV=4	ELLELEALSMAVESTGTAK	1	0	1992.02	996.515	1.17	22			0.00608856	1		1			K.ELLELEALSMAVESTGTAK.A	[705-723]	Not Used	Not Used
P47756	F-actin-capping protein subunit beta OS=Homo sapiens OX=9606 GN=CAPZB PE=1 SV=5	25	272	30.6	6	0	200	1	5	5	7	7.27781e+06	5	0.00198469
	Master Protein Accessions	Master Protein Descriptions	Sequence	# PSMs	# Missed Cleavages	Theo. MH+ [Da]	m/z [Da] (by Search Engine): Mascot	DeltaM [ppm] (by Search Engine): Mascot	Ions Score (by Search Engine): Mascot	Top Apex RT [min]	Modifications	Qvality q-value	# Proteins		# Protein Groups	Abundance: F1764: n/a, Sample, n/a, n/a	Abundances Count: F1764: n/a, Sample, n/a, n/a	Sequence in Protein	Positions in Proteins	Quan Usage	Quan Ratio Usage
	P47756	F-actin-capping protein subunit beta OS=Homo sapiens OX=9606 GN=CAPZB PE=1 SV=5	QMEKDETVSDCSPHIANIGR	2	1	2287.04	763.02	0.2	63	24.86	1xCarbamidomethyl [C11]	0.00165393	1		1	813577	1	R.QMEKDETVSDCSPHIANIGR.L	[196-215]	Used	Used
	P47756	F-actin-capping protein subunit beta OS=Homo sapiens OX=9606 GN=CAPZB PE=1 SV=5	LVEDMENKIR	1	1	1246.65	623.827	0.02	44	23.63		0.00165393	1		1	1517360	1	R.LVEDMENKIR.S	[216-225]	Used	Used
	P47756	F-actin-capping protein subunit beta OS=Homo sapiens OX=9606 GN=CAPZB PE=1 SV=5	STLNEIYFGK	2	0	1171.6	586.304	0.75	41	36.29		0.00165393	1		1	735918	1	R.STLNEIYFGK.T	[226-235]	Used	Used
	P47756	F-actin-capping protein subunit beta OS=Homo sapiens OX=9606 GN=CAPZB PE=1 SV=5	SPWSNKYDPPLEDGAMPSAR	1	1	2218.02	1109.51	-1.5	34	35.29		0.00165393	1		1	238441	1	R.SPWSNKYDPPLEDGAMPSAR.L	[73-92]	Used	Used
	P47756	F-actin-capping protein subunit beta OS=Homo sapiens OX=9606 GN=CAPZB PE=1 SV=5	RLPPQQIEK	1	1	1108.65	554.827	0.07	32	17.29		0.00456775	1		1	3972518	1	R.RLPPQQIEK.N	[15-23]	Used	Used
P00738	Haptoglobin OS=Homo sapiens OX=9606 GN=HP PE=1 SV=1	31	406	45.2	6.58	0	281	1	8	8	14	7.13499e+06	6	0.00396938
	Master Protein Accessions	Master Protein Descriptions	Sequence	# PSMs	# Missed Cleavages	Theo. MH+ [Da]	m/z [Da] (by Search Engine): Mascot	DeltaM [ppm] (by Search Engine): Mascot	Ions Score (by Search Engine): Mascot	Top Apex RT [min]	Modifications	Qvality q-value	# Proteins		# Protein Groups	Abundance: F1764: n/a, Sample, n/a, n/a	Abundances Count: F1764: n/a, Sample, n/a, n/a	Sequence in Protein	Positions in Proteins	Quan Usage	Quan Ratio Usage
	P00738	Haptoglobin OS=Homo sapiens OX=9606 GN=HP PE=1 SV=1	LRTEGDGVYTLNNEK	2	1	1708.85	854.929	0.8	73	23.35		0.00165393	1		1	377992	1	K.LRTEGDGVYTLNNEK.Q	[117-131]	Used	Used
	P00738	Haptoglobin OS=Homo sapiens OX=9606 GN=HP PE=1 SV=1	VGYVSGWGR	2	0	980.495	490.752	1.42	45	28.88		0.00165393	1		1	629672	1	R.VGYVSGWGR.N	[278-286]	Used	Used
	P00738	Haptoglobin OS=Homo sapiens OX=9606 GN=HP PE=1 SV=1	YQEDTCYGDAGSAFAVHDLEEDTWYATGILSFDK	2	0	3874.67	1292.23	0.95	46		1xCarbamidomethyl [C6]	0.00165393	1		1			K.YQEDTCYGDAGSAFAVHDLEEDTWYATGILSFDK.S	[346-379]	Not Used	Not Used
	P00738	Haptoglobin OS=Homo sapiens OX=9606 GN=HP PE=1 SV=1	YVMLPVADQDQCIR	1	0	1707.82	854.414	0.5	33	36.99	1xCarbamidomethyl [C12]	0.00165393	1		1	381928	1	K.YVMLPVADQDQCIR.H	[298-311]	Used	Used
	P00738	Haptoglobin OS=Homo sapiens OX=9606 GN=HP PE=1 SV=1	VTSIQDWVQK	1	0	1203.64	602.322	0.57	32	34.14		0.00165393	1		1	478600	1	K.VTSIQDWVQK.T	[392-401]	Used	Used
	P00738	Haptoglobin OS=Homo sapiens OX=9606 GN=HP PE=1 SV=1	TEGDGVYTLNNEKQWINK	2	1	2109.02	703.68	0.27	12			0.00165393	1		1			R.TEGDGVYTLNNEKQWINK.A	[119-136]	Not Used	Not Used
	P00738	Haptoglobin OS=Homo sapiens OX=9606 GN=HP PE=1 SV=1	SPVGVQPILNEHTFCAGMSK	2	0	2172.06	724.69	-1.47	25	38.83	1xCarbamidomethyl [C15]	0.00165393	1		1	995667	1	K.SPVGVQPILNEHTFCAGMSK.Y	[326-345]	Used	Used
	P00738	Haptoglobin OS=Homo sapiens OX=9606 GN=HP PE=1 SV=1	AVGDKLPECEAVCGKPK	2	1	1857.92	619.978	-0.36	24	21.31	2xCarbamidomethyl [C9; C13]	0.00165393	2		1	4.27113e+06	1	K.AVGDKLPECEAVCGKPK.N	[137-153]	Used	Used
P18669	Phosphoglycerate mutase 1 OS=Homo sapiens OX=9606 GN=PGAM1 PE=1 SV=2	27	254	28.8	7.18	0	197	1	5	5	11	6.83018e+06	5	0.0031188
	Master Protein Accessions	Master Protein Descriptions	Sequence	# PSMs	# Missed Cleavages	Theo. MH+ [Da]	m/z [Da] (by Search Engine): Mascot	DeltaM [ppm] (by Search Engine): Mascot	Ions Score (by Search Engine): Mascot	Top Apex RT [min]	Modifications	Qvality q-value	# Proteins		# Protein Groups	Abundance: F1764: n/a, Sample, n/a, n/a	Abundances Count: F1764: n/a, Sample, n/a, n/a	Sequence in Protein	Positions in Proteins	Quan Usage	Quan Ratio Usage
	P18669	Phosphoglycerate mutase 1 OS=Homo sapiens OX=9606 GN=PGAM1 PE=1 SV=2	YADLTEDQLPSCESLKDTIAR	4	1	2425.16	809.057	0.14	39	38.81	1xCarbamidomethyl [C12]	0.00165393	1		1	2.10683e+06	2	R.YADLTEDQLPSCESLKDTIAR.A	[142-162]	Used	Used
	P18669	Phosphoglycerate mutase 1 OS=Homo sapiens OX=9606 GN=PGAM1 PE=1 SV=2	ALPFWNEEIVPQIK	2	0	1683.91	842.459	0.05	38	54.61		0.00165393	3		1	327599	1	R.ALPFWNEEIVPQIK.E	[163-176]	Used	Used
	P18669	Phosphoglycerate mutase 1 OS=Homo sapiens OX=9606 GN=PGAM1 PE=1 SV=2	SYDVPPPPMEPDHPFYSNISK	2	0	2417.11	806.375	-0.27	19	37.93		0.0024483	2		1	1.52311e+06	1	R.SYDVPPPPMEPDHPFYSNISK.D	[118-138]	Used	Used
	P18669	Phosphoglycerate mutase 1 OS=Homo sapiens OX=9606 GN=PGAM1 PE=1 SV=2	RYADLTEDQLPSCESLKDTIAR	1	2	2581.26	861.088	-2.59	18	36.87	1xCarbamidomethyl [C13]	0.0024483	1		1	224267	1	R.RYADLTEDQLPSCESLKDTIAR.A	[141-162]	Used	Used
	P18669	Phosphoglycerate mutase 1 OS=Homo sapiens OX=9606 GN=PGAM1 PE=1 SV=2	VLIAAHGNSLR	2	0	1150.67	575.837	-1.82	24	21.87		0.00456775	2		1	2.64837e+06	1	R.VLIAAHGNSLR.G	[181-191]	Used	Used
P06737	Glycogen phosphorylase, liver form OS=Homo sapiens OX=9606 GN=PYGL PE=1 SV=4	12	847	97.1	7.17	0	317	1	8	8	14	6.80565e+06	8	0.00396938
	Master Protein Accessions	Master Protein Descriptions	Sequence	# PSMs	# Missed Cleavages	Theo. MH+ [Da]	m/z [Da] (by Search Engine): Mascot	DeltaM [ppm] (by Search Engine): Mascot	Ions Score (by Search Engine): Mascot	Top Apex RT [min]	Modifications	Qvality q-value	# Proteins		# Protein Groups	Abundance: F1764: n/a, Sample, n/a, n/a	Abundances Count: F1764: n/a, Sample, n/a, n/a	Sequence in Protein	Positions in Proteins	Quan Usage	Quan Ratio Usage
	P06737	Glycogen phosphorylase, liver form OS=Homo sapiens OX=9606 GN=PYGL PE=1 SV=4	MSLIEEEGSKR	2	1	1278.64	639.822	-0.01	28	23.3		0.00165393	1		1	1.15015e+06	1	R.MSLIEEEGSKR.I	[429-439]	Used	Used
	P06737	Glycogen phosphorylase, liver form OS=Homo sapiens OX=9606 GN=PYGL PE=1 SV=4	IGEDYVKDLSQLTK	2	1	1608.85	804.927	-1.13	54	42.12		0.00165393	1		1	641382	1	K.IGEDYVKDLSQLTK.L	[508-521]	Used	Used
	P06737	Glycogen phosphorylase, liver form OS=Homo sapiens OX=9606 GN=PYGL PE=1 SV=4	LHSFLGDDVFLR	2	0	1418.74	709.875	0.4	35	47.08		0.00165393	1		1	324071	1	K.LHSFLGDDVFLR.E	[522-533]	Used	Used
	P06737	Glycogen phosphorylase, liver form OS=Homo sapiens OX=9606 GN=PYGL PE=1 SV=4	IRDGWQVEEADDWLR	2	1	1887.9	944.453	0.46	36	44.6		0.00165393	1		1	640610	2	K.IRDGWQVEEADDWLR.Y	[171-185]	Used	Used
	P06737	Glycogen phosphorylase, liver form OS=Homo sapiens OX=9606 GN=PYGL PE=1 SV=4	VLYPNDNFFEGKELR	1	1	1840.92	920.965	0.39	47	40.47		0.00165393	3		1	199570	1	R.VLYPNDNFFEGKELR.L	[279-293]	Used	Used
	P06737	Glycogen phosphorylase, liver form OS=Homo sapiens OX=9606 GN=PYGL PE=1 SV=4	IDDVAALDKK	2	1	1087.6	544.304	0.74	42	21.1		0.00165393	1		1	1.00156e+06	1	R.IDDVAALDKK.G	[716-725]	Used	Used
	P06737	Glycogen phosphorylase, liver form OS=Homo sapiens OX=9606 GN=PYGL PE=1 SV=4	GIVGVENVAELKK	2	1	1355.79	678.398	-0.18	53	30.94		0.00165393	1		1	2.48401e+06	1	R.GIVGVENVAELKK.S	[18-30]	Used	Used
	P06737	Glycogen phosphorylase, liver form OS=Homo sapiens OX=9606 GN=PYGL PE=1 SV=4	EYYEALPELK	1	0	1254.63	627.817	0.49	10	37.24		0.00456775	1		1	364296	1	K.EYYEALPELK.L	[731-740]	Used	Used
P12724	Eosinophil cationic protein OS=Homo sapiens OX=9606 GN=RNASE3 PE=1 SV=2	28	160	18.4	10.02	0	197	1	4	4	9	6.44871e+06	4	0.00255174
	Master Protein Accessions	Master Protein Descriptions	Sequence	# PSMs	# Missed Cleavages	Theo. MH+ [Da]	m/z [Da] (by Search Engine): Mascot	DeltaM [ppm] (by Search Engine): Mascot	Ions Score (by Search Engine): Mascot	Top Apex RT [min]	Modifications	Qvality q-value	# Proteins		# Protein Groups	Abundance: F1764: n/a, Sample, n/a, n/a	Abundances Count: F1764: n/a, Sample, n/a, n/a	Sequence in Protein	Positions in Proteins	Quan Usage	Quan Ratio Usage
	P12724	Eosinophil cationic protein OS=Homo sapiens OX=9606 GN=RNASE3 PE=1 SV=2	YPVVPVHLDTTI	2	0	1353.74	677.374	-0.28	48	44.91		0.00165393	1		1	2.61594e+06	1	R.YPVVPVHLDTTI.-	[149-160]	Used	Used
	P12724	Eosinophil cationic protein OS=Homo sapiens OX=9606 GN=RNASE3 PE=1 SV=2	TTFANVVNVCGNQSIR	2	0	1779.88	890.444	0	85	35.78	1xCarbamidomethyl [C10]	0.00165393	1		1	397807	1	R.TTFANVVNVCGNQSIR.C	[73-88]	Used	Used
	P12724	Eosinophil cationic protein OS=Homo sapiens OX=9606 GN=RNASE3 PE=1 SV=2	DSPRYPVVPVHLDTTI	4	1	1808.95	904.981	0.09	30	43.42		0.00165393	1		1	945122	2	R.DSPRYPVVPVHLDTTI.-	[145-160]	Used	Used
	P12724	Eosinophil cationic protein OS=Homo sapiens OX=9606 GN=RNASE3 PE=1 SV=2	FYVVACDNRDPR	1	1	1511.71	504.574	0.01	8	24.12	1xCarbamidomethyl [C6]	0.00608856	1		1	2489840	1	R.FYVVACDNRDPR.D	[133-144]	Used	Used
P09429	High mobility group protein B1 OS=Homo sapiens OX=9606 GN=HMGB1 PE=1 SV=3	12	215	24.9	5.74	0.003	32	1	2	2	4	6.16322e+06	2	0.00113411
	Master Protein Accessions	Master Protein Descriptions	Sequence	# PSMs	# Missed Cleavages	Theo. MH+ [Da]	m/z [Da] (by Search Engine): Mascot	DeltaM [ppm] (by Search Engine): Mascot	Ions Score (by Search Engine): Mascot	Top Apex RT [min]	Modifications	Qvality q-value	# Proteins		# Protein Groups	Abundance: F1764: n/a, Sample, n/a, n/a	Abundances Count: F1764: n/a, Sample, n/a, n/a	Sequence in Protein	Positions in Proteins	Quan Usage	Quan Ratio Usage
	P09429	High mobility group protein B1 OS=Homo sapiens OX=9606 GN=HMGB1 PE=1 SV=3	IKGEHPGLSIGDVAK	2	1	1520.84	507.62	1.1	3	26.19		0.00456775	2		1	1.35414e+06	1	K.IKGEHPGLSIGDVAK.K	[113-127]	Used	Used
	P09429	High mobility group protein B1 OS=Homo sapiens OX=9606 GN=HMGB1 PE=1 SV=3	TYIPPKGETK	2	1	1133.62	567.314	0.11	25	16.13		0.00839836	2		1	4809073	1	K.TYIPPKGETK.K	[77-86]	Used	Used
P67936	Tropomyosin alpha-4 chain OS=Homo sapiens OX=9606 GN=TPM4 PE=1 SV=3	14	248	28.5	4.69	0	284	1	4	4	8	5.84623e+06	4	0.00226822
	Master Protein Accessions	Master Protein Descriptions	Sequence	# PSMs	# Missed Cleavages	Theo. MH+ [Da]	m/z [Da] (by Search Engine): Mascot	DeltaM [ppm] (by Search Engine): Mascot	Ions Score (by Search Engine): Mascot	Top Apex RT [min]	Modifications	Qvality q-value	# Proteins		# Protein Groups	Abundance: F1764: n/a, Sample, n/a, n/a	Abundances Count: F1764: n/a, Sample, n/a, n/a	Sequence in Protein	Positions in Proteins	Quan Usage	Quan Ratio Usage
	P67936	Tropomyosin alpha-4 chain OS=Homo sapiens OX=9606 GN=TPM4 PE=1 SV=3	LEEAEKAADESER	2	1	1476.68	738.845	0.88	76	16.54		0.00165393	4		1	825539	1	K.LEEAEKAADESER.G	[77-89]	Used	Used
	P67936	Tropomyosin alpha-4 chain OS=Homo sapiens OX=9606 GN=TPM4 PE=1 SV=3	IQLVEEELDRAQER	2	1	1727.89	864.45	-0.15	48	34.73		0.00165393	4		1	2.03836e+06	1	R.IQLVEEELDRAQER.L	[56-69]	Used	Used
	P67936	Tropomyosin alpha-4 chain OS=Homo sapiens OX=9606 GN=TPM4 PE=1 SV=3	LATALQKLEEAEK	2	1	1443.81	722.406	0.12	52	33.62		0.00165393	4		1	635570	1	R.LATALQKLEEAEK.A	[70-82]	Used	Used
	P67936	Tropomyosin alpha-4 chain OS=Homo sapiens OX=9606 GN=TPM4 PE=1 SV=3	LATALQKLEEAEKAADESER	2	2	2202.12	734.713	0.3	47	38.57		0.00165393	4		1	2.34675e+06	1	R.LATALQKLEEAEKAADESER.G	[70-89]	Used	Used
P08670	Vimentin OS=Homo sapiens OX=9606 GN=VIM PE=1 SV=4	25	466	53.6	5.12	0	302	1	8	8	16	5.6522e+06	8	0.00453643
	Master Protein Accessions	Master Protein Descriptions	Sequence	# PSMs	# Missed Cleavages	Theo. MH+ [Da]	m/z [Da] (by Search Engine): Mascot	DeltaM [ppm] (by Search Engine): Mascot	Ions Score (by Search Engine): Mascot	Top Apex RT [min]	Modifications	Qvality q-value	# Proteins		# Protein Groups	Abundance: F1764: n/a, Sample, n/a, n/a	Abundances Count: F1764: n/a, Sample, n/a, n/a	Sequence in Protein	Positions in Proteins	Quan Usage	Quan Ratio Usage
	P08670	Vimentin OS=Homo sapiens OX=9606 GN=VIM PE=1 SV=4	QVQSLTCEVDALKGTNESLER	2	1	2377.17	793.06	-0.11	17	38.46	1xCarbamidomethyl [C7]	0.00165393	1		1	520607	1	R.QVQSLTCEVDALKGTNESLER.Q	[322-342]	Used	Used
	P08670	Vimentin OS=Homo sapiens OX=9606 GN=VIM PE=1 SV=4	ILLAELEQLKGQGK	2	1	1539.91	770.459	-0.17	56	40.88		0.00165393	1		1	1.1561e+06	1	K.ILLAELEQLKGQGK.S	[130-143]	Used	Used
	P08670	Vimentin OS=Homo sapiens OX=9606 GN=VIM PE=1 SV=4	LQDEIQNMKEEMAR	2	1	1734.81	867.911	-0.01	79	31.87		0.00165393	1		1	623161	1	R.LQDEIQNMKEEMAR.H	[365-378]	Used	Used
	P08670	Vimentin OS=Homo sapiens OX=9606 GN=VIM PE=1 SV=4	LQEEMLQREEAENTLQSFRQDVDNASLAR	2	2	3420.64	855.917	0.63	28	48.11		0.00165393	1		1	87812.1	1	K.LQEEMLQREEAENTLQSFRQDVDNASLAR.L	[189-217]	Used	Used
	P08670	Vimentin OS=Homo sapiens OX=9606 GN=VIM PE=1 SV=4	VEVERDNLAEDIMR	4	1	1688.83	563.614	-0.19	27	36.08		0.00165393	1		1	1.80139e+06	2	R.VEVERDNLAEDIMR.L	[171-184]	Used	Used
	P08670	Vimentin OS=Homo sapiens OX=9606 GN=VIM PE=1 SV=4	KVESLQEEIAFLK	2	1	1533.85	511.956	0.47	26	44.59		0.00165393	1		1	235485	1	R.KVESLQEEIAFLK.K	[223-235]	Used	Used
	P08670	Vimentin OS=Homo sapiens OX=9606 GN=VIM PE=1 SV=4	KVESLQEEIAFLKK	1	2	1661.95	554.654	0.64	14	39.92		0.0024483	1		1	879953	1	R.KVESLQEEIAFLKK.L	[223-236]	Used	Used
	P08670	Vimentin OS=Homo sapiens OX=9606 GN=VIM PE=1 SV=4	QVDQLTNDKAR	1	1	1287.67	644.336	0.32	23	16.68		0.00456775	1		1	347694	1	R.QVDQLTNDKAR.V	[160-170]	Used	Used
P41439	Folate receptor gamma OS=Homo sapiens OX=9606 GN=FOLR3 PE=1 SV=2	38	245	27.9	7.66	0	223	1	8	8	14	5.61956e+06	7	0.00396938
	Master Protein Accessions	Master Protein Descriptions	Sequence	# PSMs	# Missed Cleavages	Theo. MH+ [Da]	m/z [Da] (by Search Engine): Mascot	DeltaM [ppm] (by Search Engine): Mascot	Ions Score (by Search Engine): Mascot	Top Apex RT [min]	Modifications	Qvality q-value	# Proteins		# Protein Groups	Abundance: F1764: n/a, Sample, n/a, n/a	Abundances Count: F1764: n/a, Sample, n/a, n/a	Sequence in Protein	Positions in Proteins	Quan Usage	Quan Ratio Usage
	P41439	Folate receptor gamma OS=Homo sapiens OX=9606 GN=FOLR3 PE=1 SV=2	NACCTASTSQELHK	1	0	1606.69	803.852	0.58	39	16.16	2xCarbamidomethyl [C3; C4]	0.00165393	2		1	197082	1	K.NACCTASTSQELHK.D	[63-76]	Used	Used
	P41439	Folate receptor gamma OS=Homo sapiens OX=9606 GN=FOLR3 PE=1 SV=2	LYNFNWDHCGK	2	0	1453.63	727.319	-0.12	43	34.2	1xCarbamidomethyl [C9]	0.00165393	2		1	1613107	1	R.LYNFNWDHCGK.M	[81-91]	Used	Used
	P41439	Folate receptor gamma OS=Homo sapiens OX=9606 GN=FOLR3 PE=1 SV=2	TDLLNVCMNAK	1	0	1278.62	639.812	-0.45	29	35.35	1xCarbamidomethyl [C7]	0.00165393	1		1	327284	1	R.TDLLNVCMNAK.H	[31-41]	Used	Used
	P41439	Folate receptor gamma OS=Homo sapiens OX=9606 GN=FOLR3 PE=1 SV=2	TQPSPEDELYGQCSPWKK	3	1	2149.99	1075.5	-0.26	44	33.22	1xCarbamidomethyl [C13]	0.00165393	1		1	2.05005e+06	2	K.TQPSPEDELYGQCSPWKK.N	[45-62]	Used	Used
	P41439	Folate receptor gamma OS=Homo sapiens OX=9606 GN=FOLR3 PE=1 SV=2	ARTDLLNVCMNAK	2	1	1505.76	753.382	0.46	42	31.42	1xCarbamidomethyl [C9]	0.00165393	1		1	780597	1	R.ARTDLLNVCMNAK.H	[29-41]	Used	Used
	P41439	Folate receptor gamma OS=Homo sapiens OX=9606 GN=FOLR3 PE=1 SV=2	FYAAAMNAGAPSR	1	0	1326.63	663.817	0.15	43			0.00165393	1		1			K.FYAAAMNAGAPSR.G	[228-240]	Not Used	Not Used
	P41439	Folate receptor gamma OS=Homo sapiens OX=9606 GN=FOLR3 PE=1 SV=2	HFIQDSCLYECSPNLGPWIR	3	0	2492.15	831.387	-1.01	26	47.21	2xCarbamidomethyl [C7; C11]	0.00165393	1		1	259704	1	R.HFIQDSCLYECSPNLGPWIR.Q	[99-118]	Used	Used
	P41439	Folate receptor gamma OS=Homo sapiens OX=9606 GN=FOLR3 PE=1 SV=2	NACCTASTSQELHKDTSR	1	1	2065.9	689.307	1.48	3	17.78	2xCarbamidomethyl [C3; C4]	0.00456775	2		1	391739	1	K.NACCTASTSQELHKDTSR.L	[63-80]	Used	Used
P12429	Annexin A3 OS=Homo sapiens OX=9606 GN=ANXA3 PE=1 SV=3	25	323	36.4	5.92	0	422	1	6	6	13	5.54847e+06	5	0.00368585
	Master Protein Accessions	Master Protein Descriptions	Sequence	# PSMs	# Missed Cleavages	Theo. MH+ [Da]	m/z [Da] (by Search Engine): Mascot	DeltaM [ppm] (by Search Engine): Mascot	Ions Score (by Search Engine): Mascot	Top Apex RT [min]	Modifications	Qvality q-value	# Proteins		# Protein Groups	Abundance: F1764: n/a, Sample, n/a, n/a	Abundances Count: F1764: n/a, Sample, n/a, n/a	Sequence in Protein	Positions in Proteins	Quan Usage	Quan Ratio Usage
	P12429	Annexin A3 OS=Homo sapiens OX=9606 GN=ANXA3 PE=1 SV=3	SLGDDISSETSGDFRK	2	1	1713.79	857.399	-0.62	71	29.41		0.00165393	1		1	2.63717e+06	1	K.SLGDDISSETSGDFRK.A	[139-154]	Used	Used
	P12429	Annexin A3 OS=Homo sapiens OX=9606 GN=ANXA3 PE=1 SV=3	SMKGAGTNEDALIEILTTR	2	1	2020.04	674.018	0.18	20	51.77		0.00165393	1		1	387350	1	K.SMKGAGTNEDALIEILTTR.T	[102-120]	Used	Used
	P12429	Annexin A3 OS=Homo sapiens OX=9606 GN=ANXA3 PE=1 SV=3	GAGTNEDALIEILTTR	2	0	1673.87	837.439	0.18	85	54.54		0.00165393	1		1	444925	1	K.GAGTNEDALIEILTTR.T	[105-120]	Used	Used
	P12429	Annexin A3 OS=Homo sapiens OX=9606 GN=ANXA3 PE=1 SV=3	DISQAYYTVYKK	2	1	1478.75	739.88	-0.41	46	29.33		0.00165393	1		1	655659	1	K.DISQAYYTVYKK.S	[127-138]	Used	Used
	P12429	Annexin A3 OS=Homo sapiens OX=9606 GN=ANXA3 PE=1 SV=3	GTVRDYPDFSPSVDAEAIQK	4	1	2195.06	1098.04	1.12	61	34.8		0.00165393	1		1	1.42337e+06	2	R.GTVRDYPDFSPSVDAEAIQK.A	[10-29]	Used	Used
	P12429	Annexin A3 OS=Homo sapiens OX=9606 GN=ANXA3 PE=1 SV=3	WGTDEDKFTEILCLR	1	1	1882.9	628.307	2.74	6		1xCarbamidomethyl [C13]	0.00456775	1		1			R.WGTDEDKFTEILCLR.S	[190-204]	Not Used	Not Used
P62736	Actin, aortic smooth muscle OS=Homo sapiens OX=9606 GN=ACTA2 PE=1 SV=1	44	377	42	5.39	0	1236	1	2	15	77	5.54294e+06	2	0.0218316
	Master Protein Accessions	Master Protein Descriptions	Sequence	# PSMs	# Missed Cleavages	Theo. MH+ [Da]	m/z [Da] (by Search Engine): Mascot	DeltaM [ppm] (by Search Engine): Mascot	Ions Score (by Search Engine): Mascot	Top Apex RT [min]	Modifications	Qvality q-value	# Proteins		# Protein Groups	Abundance: F1764: n/a, Sample, n/a, n/a	Abundances Count: F1764: n/a, Sample, n/a, n/a	Sequence in Protein	Positions in Proteins	Quan Usage	Quan Ratio Usage
	P60709; P62736	Actin, cytoplasmic 1 OS=Homo sapiens OX=9606 GN=ACTB PE=1 SV=1 Actin, aortic smooth muscle OS=Homo sapiens OX=9606 GN=ACTA2 PE=1 SV=1	MQKEITALAPSTMK	3	1	1548.81	774.91	0.25	51	28.28		0.00165393	6		2	1.1091e+07	2	R.MQKEITALAPSTMK.I	[315-328]	Not Used	Not Used
	P60709; P62736	Actin, cytoplasmic 1 OS=Homo sapiens OX=9606 GN=ACTB PE=1 SV=1 Actin, aortic smooth muscle OS=Homo sapiens OX=9606 GN=ACTA2 PE=1 SV=1	MQKEITALAPSTMK	2	1	1564.81	782.907	-0.9	53		1xOxidation [M1]	0.00165393	6		2			R.MQKEITALAPSTMK.I	[315-328]	Not Used	Not Used
	P62736	Actin, aortic smooth muscle OS=Homo sapiens OX=9606 GN=ACTA2 PE=1 SV=1	MTQIMFETFNVPAMYVAIQAVLSLYASGR	1	0	3251.63	1084.55	0.04	16			0.00165393	4		1			K.MTQIMFETFNVPAMYVAIQAVLSLYASGR.T	[121-149]	Not Used	Not Used
	P62736	Actin, aortic smooth muscle OS=Homo sapiens OX=9606 GN=ACTA2 PE=1 SV=1	YPIEHGIITNWDDMEK	4	0	1960.91	980.959	0.03	45	39.83		0.00165393	4		1	4789111	2	K.YPIEHGIITNWDDMEK.I	[71-86]	Used	Used
	P60709; P62736	Actin, cytoplasmic 1 OS=Homo sapiens OX=9606 GN=ACTB PE=1 SV=1 Actin, aortic smooth muscle OS=Homo sapiens OX=9606 GN=ACTA2 PE=1 SV=1	YSVWIGGSILASLSTFQQMWISK	3	0	2602.34	868.117	0.11	43	66.27		0.00165393	5		2	124609	1	K.YSVWIGGSILASLSTFQQMWISK.Q	[339-361]	Not Used	Not Used
	P60709; P62736	Actin, cytoplasmic 1 OS=Homo sapiens OX=9606 GN=ACTB PE=1 SV=1 Actin, aortic smooth muscle OS=Homo sapiens OX=9606 GN=ACTA2 PE=1 SV=1	SYELPDGQVITIGNER	3	0	1790.89	895.95	0.26	70	42.45		0.00165393	10		2	6720425	1	K.SYELPDGQVITIGNER.F	[241-256]	Not Used	Not Used
	P60709; P62736	Actin, cytoplasmic 1 OS=Homo sapiens OX=9606 GN=ACTB PE=1 SV=1 Actin, aortic smooth muscle OS=Homo sapiens OX=9606 GN=ACTA2 PE=1 SV=1	EITALAPSTMK	2	0	1177.61	589.309	-1.41	28	23.18	1xOxidation [M10]	0.00165393	6		2	1.04969e+06	1	K.EITALAPSTMK.I	[318-328]	Not Used	Not Used
	P60709; P62736	Actin, cytoplasmic 1 OS=Homo sapiens OX=9606 GN=ACTB PE=1 SV=1 Actin, aortic smooth muscle OS=Homo sapiens OX=9606 GN=ACTA2 PE=1 SV=1	AVFPSIVGRPR	9	0	1198.71	599.856	-0.63	36	32.37		0.00165393	9		2	111792125	2	R.AVFPSIVGRPR.H	[31-41]	Not Used	Not Used
	P60709; P62736	Actin, cytoplasmic 1 OS=Homo sapiens OX=9606 GN=ACTB PE=1 SV=1 Actin, aortic smooth muscle OS=Homo sapiens OX=9606 GN=ACTA2 PE=1 SV=1	EITALAPSTMK	2	0	1161.62	581.313	0.6	44	28.56		0.00165393	6		2	10616068	1	K.EITALAPSTMK.I	[318-328]	Not Used	Not Used
	P60709; P62736	Actin, cytoplasmic 1 OS=Homo sapiens OX=9606 GN=ACTB PE=1 SV=1 Actin, aortic smooth muscle OS=Homo sapiens OX=9606 GN=ACTA2 PE=1 SV=1	DSYVGDEAQSK	2	0	1198.52	599.764	-1.51	61	17.02		0.00165393	6		2	14534300	1	K.DSYVGDEAQSK.R	[53-63]	Not Used	Not Used
	P60709; P62736	Actin, cytoplasmic 1 OS=Homo sapiens OX=9606 GN=ACTB PE=1 SV=1 Actin, aortic smooth muscle OS=Homo sapiens OX=9606 GN=ACTA2 PE=1 SV=1	DSYVGDEAQSKR	10	1	1354.62	677.815	-0.19	59	16.55		0.00165393	6		2	79427888	1	K.DSYVGDEAQSKR.G	[53-64]	Not Used	Not Used
	P60709; P62736	Actin, cytoplasmic 1 OS=Homo sapiens OX=9606 GN=ACTB PE=1 SV=1 Actin, aortic smooth muscle OS=Homo sapiens OX=9606 GN=ACTA2 PE=1 SV=1	HQGVMVGMGQK	3	0	1171.57	586.289	-0.84	38	20.49		0.00165393	7		2	12163170	1	R.HQGVMVGMGQK.D	[42-52]	Not Used	Not Used
	P60709; P62736	Actin, cytoplasmic 1 OS=Homo sapiens OX=9606 GN=ACTB PE=1 SV=1 Actin, aortic smooth muscle OS=Homo sapiens OX=9606 GN=ACTA2 PE=1 SV=1	HQGVMVGMGQK	4	0	1187.57	594.286	-0.72	31	17.51	1xOxidation [M]	0.00165393	7		2	2344643	1	R.HQGVMVGMGQK.D	[42-52]	Not Used	Not Used
	P60709; P62736	Actin, cytoplasmic 1 OS=Homo sapiens OX=9606 GN=ACTB PE=1 SV=1 Actin, aortic smooth muscle OS=Homo sapiens OX=9606 GN=ACTA2 PE=1 SV=1	AGFAGDDAPR	7	0	976.448	488.728	-0.1	79	18.99		0.00165393	10		2	5.35456e+07	2	K.AGFAGDDAPR.A	[21-30]	Not Used	Not Used
	P60709; P62736	Actin, cytoplasmic 1 OS=Homo sapiens OX=9606 GN=ACTB PE=1 SV=1 Actin, aortic smooth muscle OS=Homo sapiens OX=9606 GN=ACTA2 PE=1 SV=1	LDLAGRDLTDYLMK	4	1	1639.84	820.422	0.22	32	41.78	1xOxidation [M13]	0.00165393	7		2	2.04887e+06	2	R.LDLAGRDLTDYLMK.I	[180-193]	Not Used	Not Used
	P60709; P62736	Actin, cytoplasmic 1 OS=Homo sapiens OX=9606 GN=ACTB PE=1 SV=1 Actin, aortic smooth muscle OS=Homo sapiens OX=9606 GN=ACTA2 PE=1 SV=1	LDLAGRDLTDYLMK	4	1	1623.84	541.952	-0.06	31	46.44		0.00165393	7		2	9711019	2	R.LDLAGRDLTDYLMK.I	[180-193]	Not Used	Not Used
	P60709; P62736	Actin, cytoplasmic 1 OS=Homo sapiens OX=9606 GN=ACTB PE=1 SV=1 Actin, aortic smooth muscle OS=Homo sapiens OX=9606 GN=ACTA2 PE=1 SV=1	HQGVMVGMGQK	2	0	1203.56	602.284	0.6	25	15.6	2xOxidation [M5; M8]	0.0024483	7		2	1.36817e+06	1	R.HQGVMVGMGQK.D	[42-52]	Not Used	Not Used
	P60709; P62736	Actin, cytoplasmic 1 OS=Homo sapiens OX=9606 GN=ACTB PE=1 SV=1 Actin, aortic smooth muscle OS=Homo sapiens OX=9606 GN=ACTA2 PE=1 SV=1	DLTDYLMK	2	0	998.486	499.747	0.7	30	40.44		0.00411958	7		2	5.59803e+06	1	R.DLTDYLMK.I	[186-193]	Not Used	Not Used
	P62736	Actin, aortic smooth muscle OS=Homo sapiens OX=9606 GN=ACTA2 PE=1 SV=1	MTQIMFETFNVPAMYVAIQAVLSLYASGR	2	0	3267.63	1089.88	2.74	4		1xOxidation [M]	0.00456775	4		1			K.MTQIMFETFNVPAMYVAIQAVLSLYASGR.T	[121-149]	Not Used	Not Used
	P60709; P62736	Actin, cytoplasmic 1 OS=Homo sapiens OX=9606 GN=ACTB PE=1 SV=1 Actin, aortic smooth muscle OS=Homo sapiens OX=9606 GN=ACTA2 PE=1 SV=1	IIAPPERK	2	1	923.567	462.287	0.24	27	17.15		0.00456775	7		2	22800998	1	K.IIAPPERK.Y	[331-338]	Not Used	Not Used
	P62736	Actin, aortic smooth muscle OS=Homo sapiens OX=9606 GN=ACTA2 PE=1 SV=1	YPIEHGIITNWDDMEK	3	0	1976.91	659.64	-0.72	8	34.85	1xOxidation [M14]	0.00456775	4		1	753826	2	K.YPIEHGIITNWDDMEK.I	[71-86]	Used	Used
	P60709; P62736	Actin, cytoplasmic 1 OS=Homo sapiens OX=9606 GN=ACTB PE=1 SV=1 Actin, aortic smooth muscle OS=Homo sapiens OX=9606 GN=ACTA2 PE=1 SV=1	IKIIAPPERK	2	2	1164.75	582.877	0.21	24	22.86		0.00456775	7		2	2.15101e+06	1	K.IKIIAPPERK.Y	[329-338]	Not Used	Not Used
	P60709; P62736	Actin, cytoplasmic 1 OS=Homo sapiens OX=9606 GN=ACTB PE=1 SV=1 Actin, aortic smooth muscle OS=Homo sapiens OX=9606 GN=ACTA2 PE=1 SV=1	DLTDYLMK	1	0	1014.48	507.744	0.22	18	33.52	1xOxidation [M7]	0.00839836	7		2	2.90647e+06	1	R.DLTDYLMK.I	[186-193]	Not Used	Not Used
P05106	Integrin beta-3 OS=Homo sapiens OX=9606 GN=ITGB3 PE=1 SV=2	14	788	87	5.24	0	307	1	7	7	12	5.32019e+06	7	0.00340232
	Master Protein Accessions	Master Protein Descriptions	Sequence	# PSMs	# Missed Cleavages	Theo. MH+ [Da]	m/z [Da] (by Search Engine): Mascot	DeltaM [ppm] (by Search Engine): Mascot	Ions Score (by Search Engine): Mascot	Top Apex RT [min]	Modifications	Qvality q-value	# Proteins		# Protein Groups	Abundance: F1764: n/a, Sample, n/a, n/a	Abundances Count: F1764: n/a, Sample, n/a, n/a	Sequence in Protein	Positions in Proteins	Quan Usage	Quan Ratio Usage
	P05106	Integrin beta-3 OS=Homo sapiens OX=9606 GN=ITGB3 PE=1 SV=2	VLEDRPLSDKGSGDSSQVTQVSPQR	2	1	2685.34	895.785	-1.72	54	22.3		0.00165393	1		1	2.16313e+06	1	R.VLEDRPLSDKGSGDSSQVTQVSPQR.I	[89-113]	Used	Used
	P05106	Integrin beta-3 OS=Homo sapiens OX=9606 GN=ITGB3 PE=1 SV=2	YCECDDFSCVR	2	0	1510.54	755.773	-0.72	16	25.65	3xCarbamidomethyl [C2; C4; C9]	0.00165393	1		1	342440	1	K.YCECDDFSCVR.Y	[546-556]	Used	Used
	P05106	Integrin beta-3 OS=Homo sapiens OX=9606 GN=ITGB3 PE=1 SV=2	GECLCGQCVCHSSDFGK	1	0	2000.77	1000.89	0.83	74	22.68	4xCarbamidomethyl [C3; C5; C8; C10]	0.00165393	1		1	167284	1	R.GECLCGQCVCHSSDFGK.I	[525-541]	Used	Used
	P05106	Integrin beta-3 OS=Homo sapiens OX=9606 GN=ITGB3 PE=1 SV=2	CDLKENLLKDNCAPESIEFPVSEAR	2	2	2934.4	978.805	0.81	47	40.55	2xCarbamidomethyl [C1; C12]	0.00165393	1		1	785230	1	R.CDLKENLLKDNCAPESIEFPVSEAR.V	[64-88]	Used	Used
	P05106	Integrin beta-3 OS=Homo sapiens OX=9606 GN=ITGB3 PE=1 SV=2	HVLTLTDQVTR	2	0	1282.71	641.859	-0.62	28	26.21		0.00165393	1		1	501134	1	K.HVLTLTDQVTR.F	[218-228]	Used	Used
	P05106	Integrin beta-3 OS=Homo sapiens OX=9606 GN=ITGB3 PE=1 SV=2	NDASHLLVFTTDAK	1	0	1531.78	766.391	-0.24	23	36.81		0.0024483	1		1	365150	1	R.NDASHLLVFTTDAK.T	[266-279]	Used	Used
	P05106	Integrin beta-3 OS=Homo sapiens OX=9606 GN=ITGB3 PE=1 SV=2	GALHDENTCNR	2	0	1286.55	643.781	-0.04	29	15.23	1xCarbamidomethyl [C9]	0.0024483	1		1	995826	1	R.GALHDENTCNR.Y	[649-659]	Used	Used
P25815	Protein S100-P OS=Homo sapiens OX=9606 GN=S100P PE=1 SV=2	40	95	10.4	4.88	0	89	1	3	3	8	5.13507e+06	3	0.00226822
	Master Protein Accessions	Master Protein Descriptions	Sequence	# PSMs	# Missed Cleavages	Theo. MH+ [Da]	m/z [Da] (by Search Engine): Mascot	DeltaM [ppm] (by Search Engine): Mascot	Ions Score (by Search Engine): Mascot	Top Apex RT [min]	Modifications	Qvality q-value	# Proteins		# Protein Groups	Abundance: F1764: n/a, Sample, n/a, n/a	Abundances Count: F1764: n/a, Sample, n/a, n/a	Sequence in Protein	Positions in Proteins	Quan Usage	Quan Ratio Usage
	P25815	Protein S100-P OS=Homo sapiens OX=9606 GN=S100P PE=1 SV=2	VLMEKELPGFLQSGK	4	1	1675.91	559.308	-0.42	20	41.41		0.00165393	1		1	691772	2	K.VLMEKELPGFLQSGK.D	[35-49]	Used	Used
	P25815	Protein S100-P OS=Homo sapiens OX=9606 GN=S100P PE=1 SV=2	TELETAMGMIIDVFSR	2	0	1854.9	927.953	0.64	36	68.3	1xAcetyl [N-Term]	0.00165393	1		1	30453.7	1	M.TELETAMGMIIDVFSR.Y	[2-17]	Used	Used
	P25815	Protein S100-P OS=Homo sapiens OX=9606 GN=S100P PE=1 SV=2	ELPGFLQSGKDKDAVDK	2	2	1846.95	616.323	-0.14	9	30.37		0.00165393	1		1	4.41284e+06	1	K.ELPGFLQSGKDKDAVDK.L	[40-56]	Used	Used
P08575	Receptor-type tyrosine-protein phosphatase C OS=Homo sapiens OX=9606 GN=PTPRC PE=1 SV=3	6	1306	147.4	6.15	0	274	1	6	6	14	5.0829e+06	5	0.00396938
	Master Protein Accessions	Master Protein Descriptions	Sequence	# PSMs	# Missed Cleavages	Theo. MH+ [Da]	m/z [Da] (by Search Engine): Mascot	DeltaM [ppm] (by Search Engine): Mascot	Ions Score (by Search Engine): Mascot	Top Apex RT [min]	Modifications	Qvality q-value	# Proteins		# Protein Groups	Abundance: F1764: n/a, Sample, n/a, n/a	Abundances Count: F1764: n/a, Sample, n/a, n/a	Sequence in Protein	Positions in Proteins	Quan Usage	Quan Ratio Usage
	P08575	Receptor-type tyrosine-protein phosphatase C OS=Homo sapiens OX=9606 GN=PTPRC PE=1 SV=3	SEAAHQGVITWNPPQR	3	0	1790.89	597.635	-0.8	11	29.2		0.00165393	1		1	2.30224e+06	1	R.SEAAHQGVITWNPPQR.S	[402-417]	Used	Used
	P08575	Receptor-type tyrosine-protein phosphatase C OS=Homo sapiens OX=9606 GN=PTPRC PE=1 SV=3	RDPPSEPSPLEAEFQR	4	1	1854.9	618.971	-0.29	22	32.58		0.00165393	1		1	1.21874e+06	2	K.RDPPSEPSPLEAEFQR.L	[935-950]	Used	Used
	P08575	Receptor-type tyrosine-protein phosphatase C OS=Homo sapiens OX=9606 GN=PTPRC PE=1 SV=3	LFLAEFQSIPR	2	0	1320.73	660.869	-0.12	51	49.26		0.00165393	1		1	295927	1	R.LFLAEFQSIPR.V	[652-662]	Used	Used
	P08575	Receptor-type tyrosine-protein phosphatase C OS=Homo sapiens OX=9606 GN=PTPRC PE=1 SV=3	VKDLQYSTDYTFK	2	1	1607.8	804.402	0.42	42	30.12		0.00165393	1		1	972770	1	R.VKDLQYSTDYTFK.A	[541-553]	Used	Used
	P08575	Receptor-type tyrosine-protein phosphatase C OS=Homo sapiens OX=9606 GN=PTPRC PE=1 SV=3	TDFGSPGEPQIIFCR	2	0	1723.81	862.41	0.71	28	41.87	1xCarbamidomethyl [C14]	0.00165393	1		1	293230	1	K.TDFGSPGEPQIIFCR.S	[387-401]	Used	Used
	P08575	Receptor-type tyrosine-protein phosphatase C OS=Homo sapiens OX=9606 GN=PTPRC PE=1 SV=3	FQCGNMIFDNK	1	0	1373.6	687.302	-0.39	20		1xCarbamidomethyl [C3]	0.00456775	1		1			R.FQCGNMIFDNK.E	[342-352]	Not Used	Not Used
P31997	Carcinoembryonic antigen-related cell adhesion molecule 8 OS=Homo sapiens OX=9606 GN=CEACAM8 PE=1 SV=2	7	349	38.1	7.39	0	171	1	2	2	4	4.76952e+06	2	0.00113411
	Master Protein Accessions	Master Protein Descriptions	Sequence	# PSMs	# Missed Cleavages	Theo. MH+ [Da]	m/z [Da] (by Search Engine): Mascot	DeltaM [ppm] (by Search Engine): Mascot	Ions Score (by Search Engine): Mascot	Top Apex RT [min]	Modifications	Qvality q-value	# Proteins		# Protein Groups	Abundance: F1764: n/a, Sample, n/a, n/a	Abundances Count: F1764: n/a, Sample, n/a, n/a	Sequence in Protein	Positions in Proteins	Quan Usage	Quan Ratio Usage
	P31997	Carcinoembryonic antigen-related cell adhesion molecule 8 OS=Homo sapiens OX=9606 GN=CEACAM8 PE=1 SV=2	NSGSYACHTTNSATGR	2	0	1683.71	842.361	0.18	77	15.56	1xCarbamidomethyl [C7]	0.00165393	1		1	1.57931e+06	1	K.NSGSYACHTTNSATGR.N	[293-308]	Used	Used
	P31997	Carcinoembryonic antigen-related cell adhesion molecule 8 OS=Homo sapiens OX=9606 GN=CEACAM8 PE=1 SV=2	TLTLLSVTR	2	0	1003.61	502.311	0.27	33	39.53		0.0024483	3		1	3.19021e+06	1	R.TLTLLSVTR.N	[199-207]	Used	Used
P52566	Rho GDP-dissociation inhibitor 2 OS=Homo sapiens OX=9606 GN=ARHGDIB PE=1 SV=3	45	201	23	5.21	0	116	1	5	5	10	4.75251e+06	5	0.00283527
	Master Protein Accessions	Master Protein Descriptions	Sequence	# PSMs	# Missed Cleavages	Theo. MH+ [Da]	m/z [Da] (by Search Engine): Mascot	DeltaM [ppm] (by Search Engine): Mascot	Ions Score (by Search Engine): Mascot	Top Apex RT [min]	Modifications	Qvality q-value	# Proteins		# Protein Groups	Abundance: F1764: n/a, Sample, n/a, n/a	Abundances Count: F1764: n/a, Sample, n/a, n/a	Sequence in Protein	Positions in Proteins	Quan Usage	Quan Ratio Usage
	P52566	Rho GDP-dissociation inhibitor 2 OS=Homo sapiens OX=9606 GN=ARHGDIB PE=1 SV=3	LTLVCESAPGPITMDLTGDLEALKK	2	1	2672.39	891.469	1.57	29	55.34	1xCarbamidomethyl [C5]	0.00165393	1		1	325185	1	R.LTLVCESAPGPITMDLTGDLEALKK.E	[72-96]	Used	Used
	P52566	Rho GDP-dissociation inhibitor 2 OS=Homo sapiens OX=9606 GN=ARHGDIB PE=1 SV=3	VDKATFMVGSYGPRPEEYEFLTPVEEAPK	2	1	3286.6	1096.21	1.03	40	46.97		0.00165393	1		1	368972	1	K.VDKATFMVGSYGPRPEEYEFLTPVEEAPK.G	[136-164]	Used	Used
	P52566	Rho GDP-dissociation inhibitor 2 OS=Homo sapiens OX=9606 GN=ARHGDIB PE=1 SV=3	ATFMVGSYGPRPEEYEFLTPVEEAPK	2	0	2960.4	987.472	-0.3	25		1xOxidation [M4]	0.00165393	1		1			K.ATFMVGSYGPRPEEYEFLTPVEEAPK.G	[139-164]	Not Used	Not Used
	P52566	Rho GDP-dissociation inhibitor 2 OS=Homo sapiens OX=9606 GN=ARHGDIB PE=1 SV=3	ATFMVGSYGPRPEEYEFLTPVEEAPK	2	0	2944.41	982.141	0.65	37	49.22		0.00165393	1		1	875188	1	K.ATFMVGSYGPRPEEYEFLTPVEEAPK.G	[139-164]	Used	Used
	P52566	Rho GDP-dissociation inhibitor 2 OS=Homo sapiens OX=9606 GN=ARHGDIB PE=1 SV=3	TEKAPEPHVEEDDDDELDSKLNYKPPPQK	1	2	3405.6	852.156	1.95	3	28.56	1xAcetyl [N-Term]	0.0024483	1		1	358662	1	M.TEKAPEPHVEEDDDDELDSKLNYKPPPQK.S	[2-30]	Used	Used
	P52566	Rho GDP-dissociation inhibitor 2 OS=Homo sapiens OX=9606 GN=ARHGDIB PE=1 SV=3	YVQHTYR	1	0	966.479	483.744	1.06	11	17.82		0.00767435	1		1	2824500	1	K.YVQHTYR.T	[125-131]	Used	Used
Q9H299	SH3 domain-binding glutamic acid-rich-like protein 3 OS=Homo sapiens OX=9606 GN=SH3BGRL3 PE=1 SV=1	43	93	10.4	4.93	0	103	1	3	3	8	4.68841e+06	3	0.00226822
	Master Protein Accessions	Master Protein Descriptions	Sequence	# PSMs	# Missed Cleavages	Theo. MH+ [Da]	m/z [Da] (by Search Engine): Mascot	DeltaM [ppm] (by Search Engine): Mascot	Ions Score (by Search Engine): Mascot	Top Apex RT [min]	Modifications	Qvality q-value	# Proteins		# Protein Groups	Abundance: F1764: n/a, Sample, n/a, n/a	Abundances Count: F1764: n/a, Sample, n/a, n/a	Sequence in Protein	Positions in Proteins	Quan Usage	Quan Ratio Usage
	Q9H299	SH3 domain-binding glutamic acid-rich-like protein 3 OS=Homo sapiens OX=9606 GN=SH3BGRL3 PE=1 SV=1	IQYQLVDISQDNALRDEMR	3	1	2307.14	769.718	0.11	41	42.69		0.00165393	1		1	2.11659e+06	2	R.IQYQLVDISQDNALRDEMR.A	[33-51]	Used	Used
	Q9H299	SH3 domain-binding glutamic acid-rich-like protein 3 OS=Homo sapiens OX=9606 GN=SH3BGRL3 PE=1 SV=1	EIKSQQSEVTR	2	1	1304.68	652.844	-0.52	48	15.56		0.00165393	1		1	941898	1	R.EIKSQQSEVTR.I	[16-26]	Used	Used
	Q9H299	SH3 domain-binding glutamic acid-rich-like protein 3 OS=Homo sapiens OX=9606 GN=SH3BGRL3 PE=1 SV=1	IQYQLVDISQDNALRDEMR	1	1	2323.13	775.05	0.45	15		1xOxidation [M18]	0.00339245	1		1			R.IQYQLVDISQDNALRDEMR.A	[33-51]	Not Used	Not Used
	Q9H299	SH3 domain-binding glutamic acid-rich-like protein 3 OS=Homo sapiens OX=9606 GN=SH3BGRL3 PE=1 SV=1	VYSTSVTGSR	2	0	1056.53	528.77	0.36	18	17.61		0.00411958	1		1	1629922	1	R.VYSTSVTGSR.E	[6-15]	Used	Used
P63104	14-3-3 protein zeta/delta OS=Homo sapiens OX=9606 GN=YWHAZ PE=1 SV=1	47	245	27.7	4.79	0	261	1	8	8	13	4.63084e+06	6	0.00368585
	Master Protein Accessions	Master Protein Descriptions	Sequence	# PSMs	# Missed Cleavages	Theo. MH+ [Da]	m/z [Da] (by Search Engine): Mascot	DeltaM [ppm] (by Search Engine): Mascot	Ions Score (by Search Engine): Mascot	Top Apex RT [min]	Modifications	Qvality q-value	# Proteins		# Protein Groups	Abundance: F1764: n/a, Sample, n/a, n/a	Abundances Count: F1764: n/a, Sample, n/a, n/a	Sequence in Protein	Positions in Proteins	Quan Usage	Quan Ratio Usage
	P63104	14-3-3 protein zeta/delta OS=Homo sapiens OX=9606 GN=YWHAZ PE=1 SV=1	YLAEVAAGDDKK	2	1	1279.65	640.33	0.2	28	19.58		0.00165393	1		1	835977	1	R.YLAEVAAGDDKK.G	[128-139]	Used	Used
	P63104	14-3-3 protein zeta/delta OS=Homo sapiens OX=9606 GN=YWHAZ PE=1 SV=1	VVSSIEQKTEGAEK	1	1	1504.79	752.897	1.05	48	17.87		0.00165393	1		1	314400	1	R.VVSSIEQKTEGAEK.K	[61-74]	Used	Used
	P63104	14-3-3 protein zeta/delta OS=Homo sapiens OX=9606 GN=YWHAZ PE=1 SV=1	SVTEQGAELSNEER	2	0	1548.71	774.86	-0.32	83	20.13		0.00165393	1		1	486068	1	K.SVTEQGAELSNEER.N	[28-41]	Used	Used
	P63104	14-3-3 protein zeta/delta OS=Homo sapiens OX=9606 GN=YWHAZ PE=1 SV=1	TAFDEAIAELDTLSEESYKDSTLIMQLLR	1	1	3318.63	1106.88	2.62	39		1xOxidation [M25]	0.00165393	1		1			K.TAFDEAIAELDTLSEESYKDSTLIMQLLR.D	[194-222]	Not Used	Not Used
	P63104	14-3-3 protein zeta/delta OS=Homo sapiens OX=9606 GN=YWHAZ PE=1 SV=1	LAEQAERYDDMAACMK	4	1	1901.82	951.413	-0.14	38	27.98	1xCarbamidomethyl [C14]	0.00165393	1		1	1.48708e+06	2	K.LAEQAERYDDMAACMK.S	[12-27]	Used	Used
	P63104	14-3-3 protein zeta/delta OS=Homo sapiens OX=9606 GN=YWHAZ PE=1 SV=1	GIVDQSQQAYQEAFEISKK	1	1	2169.08	723.7	1.58	16	40.37		0.00165393	1		1	696066	1	K.GIVDQSQQAYQEAFEISKK.E	[140-158]	Used	Used
	P63104	14-3-3 protein zeta/delta OS=Homo sapiens OX=9606 GN=YWHAZ PE=1 SV=1	FLIPNASQAESK	1	0	1304.68	652.846	-0.13	21	31.49		0.0024483	1		1	811249	1	K.FLIPNASQAESK.V	[104-115]	Used	Used
	P63104	14-3-3 protein zeta/delta OS=Homo sapiens OX=9606 GN=YWHAZ PE=1 SV=1	TAFDEAIAELDTLSEESYK	1	0	2131.99	1066.5	0.54	11			0.00456775	1		1			K.TAFDEAIAELDTLSEESYK.D	[194-212]	Not Used	Not Used
P62987	Ubiquitin-60S ribosomal protein L40 OS=Homo sapiens OX=9606 GN=UBA52 PE=1 SV=2	35	128	14.7	9.83	0	121	1	2	2	11	4.49065e+06	3	0.0031188
	Master Protein Accessions	Master Protein Descriptions	Sequence	# PSMs	# Missed Cleavages	Theo. MH+ [Da]	m/z [Da] (by Search Engine): Mascot	DeltaM [ppm] (by Search Engine): Mascot	Ions Score (by Search Engine): Mascot	Top Apex RT [min]	Modifications	Qvality q-value	# Proteins		# Protein Groups	Abundance: F1764: n/a, Sample, n/a, n/a	Abundances Count: F1764: n/a, Sample, n/a, n/a	Sequence in Protein	Positions in Proteins	Quan Usage	Quan Ratio Usage
	P62987	Ubiquitin-60S ribosomal protein L40 OS=Homo sapiens OX=9606 GN=UBA52 PE=1 SV=2	MQIFVKTLTGKTITLEVEPSDTIENVK	5	2	3034.64	1012.22	0.17	45	51.63		0.00165393	4		1	484292	1	-.MQIFVKTLTGKTITLEVEPSDTIENVK.A	[1-27]	Used	Used
	P62987	Ubiquitin-60S ribosomal protein L40 OS=Homo sapiens OX=9606 GN=UBA52 PE=1 SV=2	MQIFVKTLTGKTITLEVEPSDTIENVK	4	2	3050.63	1017.55	0.18	38	46.95	1xOxidation [M1]	0.00165393	4		1	3.50436e+06	2	-.MQIFVKTLTGKTITLEVEPSDTIENVK.A	[1-27]	Used	Used
	P62987	Ubiquitin-60S ribosomal protein L40 OS=Homo sapiens OX=9606 GN=UBA52 PE=1 SV=2	TLSDYNIQKESTLHLVLR	2	1	2130.16	710.723	-0.71	8	39.13		0.00165393	4		1	501988	1	R.TLSDYNIQKESTLHLVLR.L	[55-72]	Used	Used
P04899	Guanine nucleotide-binding protein G(i) subunit alpha-2 OS=Homo sapiens OX=9606 GN=GNAI2 PE=1 SV=3	19	355	40.4	5.54	0	326	1	4	4	12	4.48042e+06	4	0.00340232
	Master Protein Accessions	Master Protein Descriptions	Sequence	# PSMs	# Missed Cleavages	Theo. MH+ [Da]	m/z [Da] (by Search Engine): Mascot	DeltaM [ppm] (by Search Engine): Mascot	Ions Score (by Search Engine): Mascot	Top Apex RT [min]	Modifications	Qvality q-value	# Proteins		# Protein Groups	Abundance: F1764: n/a, Sample, n/a, n/a	Abundances Count: F1764: n/a, Sample, n/a, n/a	Sequence in Protein	Positions in Proteins	Quan Usage	Quan Ratio Usage
	P04899	Guanine nucleotide-binding protein G(i) subunit alpha-2 OS=Homo sapiens OX=9606 GN=GNAI2 PE=1 SV=3	IIHEDGYSEEECR	4	0	1636.69	818.849	0	60	18.4	1xCarbamidomethyl [C12]	0.00165393	1		1	1.57034e+06	2	K.IIHEDGYSEEECR.Q	[55-67]	Used	Used
	P04899	Guanine nucleotide-binding protein G(i) subunit alpha-2 OS=Homo sapiens OX=9606 GN=GNAI2 PE=1 SV=3	SREYQLNDSAAYYLNDLER	4	1	2320.08	774.033	-0.03	52	43.77		0.00165393	1		1	1.25379e+06	2	R.SREYQLNDSAAYYLNDLER.I	[144-162]	Used	Used
	P04899	Guanine nucleotide-binding protein G(i) subunit alpha-2 OS=Homo sapiens OX=9606 GN=GNAI2 PE=1 SV=3	AMGNLQIDFADPSRADDAR	3	1	2062.96	688.325	0.28	55	38.77		0.00165393	1		1	1.22782e+06	2	K.AMGNLQIDFADPSRADDAR.Q	[87-105]	Used	Used
	P04899	Guanine nucleotide-binding protein G(i) subunit alpha-2 OS=Homo sapiens OX=9606 GN=GNAI2 PE=1 SV=3	IAQSDYIPTQQDVLR	1	0	1746.9	873.954	-0.39	18	34.68		0.0024483	1		1	428470	1	R.IAQSDYIPTQQDVLR.T	[163-177]	Used	Used
P17927	Complement receptor type 1 OS=Homo sapiens OX=9606 GN=CR1 PE=1 SV=3	8	2039	223.5	6.95	0	233	1	7	7	10	4.39516e+06	7	0.00283527
	Master Protein Accessions	Master Protein Descriptions	Sequence	# PSMs	# Missed Cleavages	Theo. MH+ [Da]	m/z [Da] (by Search Engine): Mascot	DeltaM [ppm] (by Search Engine): Mascot	Ions Score (by Search Engine): Mascot	Top Apex RT [min]	Modifications	Qvality q-value	# Proteins		# Protein Groups	Abundance: F1764: n/a, Sample, n/a, n/a	Abundances Count: F1764: n/a, Sample, n/a, n/a	Sequence in Protein	Positions in Proteins	Quan Usage	Quan Ratio Usage
	P17927	Complement receptor type 1 OS=Homo sapiens OX=9606 GN=CR1 PE=1 SV=3	SCDDFLGQLPHGR	2	0	1501.69	751.347	0.6	64	34.73	1xCarbamidomethyl [C2]	0.00165393	1		1	826257	1	K.SCDDFLGQLPHGR.V; K.SCDDFLGQLPHGR.V	[1257-1269]; [1710-1722]	Used	Used
	P17927	Complement receptor type 1 OS=Homo sapiens OX=9606 GN=CR1 PE=1 SV=3	GAASLHCTPQGDWSPEAPR	2	0	2036.92	679.646	-0.27	38	26.97	1xCarbamidomethyl [C7]	0.00165393	1		1	906506	1	R.GAASLHCTPQGDWSPEAPR.C; R.GAASLHCTPQGDWSPEAPR.C	[1234-1252]; [1687-1705]	Used	Used
	P17927	Complement receptor type 1 OS=Homo sapiens OX=9606 GN=CR1 PE=1 SV=3	DKDNFSPGQEVFYSCEPGYDLR	2	1	2623.14	875.053	0.99	44	40.27	1xCarbamidomethyl [C15]	0.00165393	2		1	798462	1	R.DKDNFSPGQEVFYSCEPGYDLR.G; R.DKDNFSPGQEVFYSCEPGYDLR.G	[312-333]; [762-783]	Used	Used
	P17927	Complement receptor type 1 OS=Homo sapiens OX=9606 GN=CR1 PE=1 SV=3	VCQPPPDVLHAER	1	0	1517.75	759.381	1.19	10	23.26	1xCarbamidomethyl [C2]	0.0024483	2		1	544343	1	R.VCQPPPDVLHAER.T; R.VCQPPPDVLHAER.T	[296-308]; [746-758]	Used	Used
	P17927	Complement receptor type 1 OS=Homo sapiens OX=9606 GN=CR1 PE=1 SV=3	HTGTPSGDIPYGK	1	0	1329.64	665.326	0.37	45	19.81		0.00456775	1		1	416654	1	R.HTGTPSGDIPYGK.E	[1332-1344]	Used	Used
	P17927	Complement receptor type 1 OS=Homo sapiens OX=9606 GN=CR1 PE=1 SV=3	SASHCVLAGMK	1	0	1160.56	580.781	0.36	6	21.38	1xCarbamidomethyl [C5]	0.00456775	1		1	269608	1	R.SASHCVLAGMK.A	[1749-1759]	Used	Used
	P17927	Complement receptor type 1 OS=Homo sapiens OX=9606 GN=CR1 PE=1 SV=3	HTGTPFGDIPYGK	1	0	1389.68	695.343	-0.51	38	33.09		0.00767435	1		1	633325	1	R.HTGTPFGDIPYGK.E	[1785-1797]	Used	Used
P02776	Platelet factor 4 OS=Homo sapiens OX=9606 GN=PF4 PE=1 SV=2	36	101	10.8	8.62	0	84	1	3	3	5	4.25967e+06	3	0.00141764
	Master Protein Accessions	Master Protein Descriptions	Sequence	# PSMs	# Missed Cleavages	Theo. MH+ [Da]	m/z [Da] (by Search Engine): Mascot	DeltaM [ppm] (by Search Engine): Mascot	Ions Score (by Search Engine): Mascot	Top Apex RT [min]	Modifications	Qvality q-value	# Proteins		# Protein Groups	Abundance: F1764: n/a, Sample, n/a, n/a	Abundances Count: F1764: n/a, Sample, n/a, n/a	Sequence in Protein	Positions in Proteins	Quan Usage	Quan Ratio Usage
	P02776	Platelet factor 4 OS=Homo sapiens OX=9606 GN=PF4 PE=1 SV=2	KICLDLQAPLYK	1	1	1461.81	731.411	0.93	37	39.83	1xCarbamidomethyl [C3]	0.00165393	1		1	212243	1	R.KICLDLQAPLYK.K	[81-92]	Used	Used
	P02776	Platelet factor 4 OS=Homo sapiens OX=9606 GN=PF4 PE=1 SV=2	AGPHCPTAQLIATLK	2	0	1577.85	789.427	-0.43	37	36.86	1xCarbamidomethyl [C5]	0.00165393	2		1	1.11593e+06	1	K.AGPHCPTAQLIATLK.N	[63-77]	Used	Used
	P02776	Platelet factor 4 OS=Homo sapiens OX=9606 GN=PF4 PE=1 SV=2	HITSLEVIK	2	0	1039.61	520.311	0.26	24	27.02		0.00456775	2		1	2931501	1	R.HITSLEVIK.A	[54-62]	Used	Used
P80723	Brain acid soluble protein 1 OS=Homo sapiens OX=9606 GN=BASP1 PE=1 SV=2	26	227	22.7	4.63	0	163	1	3	3	8	4.20196e+06	2	0.00226822
	Master Protein Accessions	Master Protein Descriptions	Sequence	# PSMs	# Missed Cleavages	Theo. MH+ [Da]	m/z [Da] (by Search Engine): Mascot	DeltaM [ppm] (by Search Engine): Mascot	Ions Score (by Search Engine): Mascot	Top Apex RT [min]	Modifications	Qvality q-value	# Proteins		# Protein Groups	Abundance: F1764: n/a, Sample, n/a, n/a	Abundances Count: F1764: n/a, Sample, n/a, n/a	Sequence in Protein	Positions in Proteins	Quan Usage	Quan Ratio Usage
	P80723	Brain acid soluble protein 1 OS=Homo sapiens OX=9606 GN=BASP1 PE=1 SV=2	SDGAPASDSKPGSSEAAPSSK	4	0	1932.88	966.943	0.5	59	15.43		0.00165393	1		1	2.03954e+06	2	K.SDGAPASDSKPGSSEAAPSSK.E	[164-184]	Used	Used
	P80723	Brain acid soluble protein 1 OS=Homo sapiens OX=9606 GN=BASP1 PE=1 SV=2	AEPPKAPEQEQAAPGPAAGGEAPK	2	1	2298.14	766.717	0.56	44	18.48		0.00165393	1		1	2.16242e+06	1	K.AEPPKAPEQEQAAPGPAAGGEAPK.A	[98-121]	Used	Used
	P80723	Brain acid soluble protein 1 OS=Homo sapiens OX=9606 GN=BASP1 PE=1 SV=2	AEGAATEEEGTPK	2	0	1289.59	645.297	0.38	47			0.00165393	1		1			K.AEGAATEEEGTPK.E	[26-38]	Not Used	Not Used
O14950	Myosin regulatory light chain 12B OS=Homo sapiens OX=9606 GN=MYL12B PE=1 SV=2	17	172	19.8	4.84	0	160	1	2	2	6	4.1056e+06	2	0.00170116
	Master Protein Accessions	Master Protein Descriptions	Sequence	# PSMs	# Missed Cleavages	Theo. MH+ [Da]	m/z [Da] (by Search Engine): Mascot	DeltaM [ppm] (by Search Engine): Mascot	Ions Score (by Search Engine): Mascot	Top Apex RT [min]	Modifications	Qvality q-value	# Proteins		# Protein Groups	Abundance: F1764: n/a, Sample, n/a, n/a	Abundances Count: F1764: n/a, Sample, n/a, n/a	Sequence in Protein	Positions in Proteins	Quan Usage	Quan Ratio Usage
	O14950	Myosin regulatory light chain 12B OS=Homo sapiens OX=9606 GN=MYL12B PE=1 SV=2	ELLTTMGDRFTDEEVDELYR	4	1	2432.13	811.381	-0.2	45	47.93		0.00165393	2		1	1.70654e+06	2	R.ELLTTMGDRFTDEEVDELYR.E	[125-144]	Used	Used
	O14950	Myosin regulatory light chain 12B OS=Homo sapiens OX=9606 GN=MYL12B PE=1 SV=2	GNFNYIEFTR	2	0	1260.6	630.804	0.19	61	39.58		0.00165393	2		1	2.39906e+06	1	K.GNFNYIEFTR.I	[152-161]	Used	Used
P23528	Cofilin-1 OS=Homo sapiens OX=9606 GN=CFL1 PE=1 SV=3	34	166	18.5	8.09	0	131	1	5	5	9	3.74186e+06	3	0.00255174
	Master Protein Accessions	Master Protein Descriptions	Sequence	# PSMs	# Missed Cleavages	Theo. MH+ [Da]	m/z [Da] (by Search Engine): Mascot	DeltaM [ppm] (by Search Engine): Mascot	Ions Score (by Search Engine): Mascot	Top Apex RT [min]	Modifications	Qvality q-value	# Proteins		# Protein Groups	Abundance: F1764: n/a, Sample, n/a, n/a	Abundances Count: F1764: n/a, Sample, n/a, n/a	Sequence in Protein	Positions in Proteins	Quan Usage	Quan Ratio Usage
	P23528	Cofilin-1 OS=Homo sapiens OX=9606 GN=CFL1 PE=1 SV=3	LGGSAVISLEGKPL	1	0	1340.78	670.893	-0.4	38	41.39		0.00165393	1		1	456315	1	K.LGGSAVISLEGKPL.-	[153-166]	Used	Used
	P23528	Cofilin-1 OS=Homo sapiens OX=9606 GN=CFL1 PE=1 SV=3	YALYDATYETK	2	0	1337.63	669.317	0.39	40	29.82		0.00165393	2		1	1.61652e+06	1	R.YALYDATYETK.E	[82-92]	Used	Used
	P23528	Cofilin-1 OS=Homo sapiens OX=9606 GN=CFL1 PE=1 SV=3	AVLFCLSEDKK	2	1	1309.68	655.344	-0.26	33	33.67	1xCarbamidomethyl [C5]	0.00165393	1		1	1669027	1	K.AVLFCLSEDKK.N	[35-45]	Used	Used
	P23528	Cofilin-1 OS=Homo sapiens OX=9606 GN=CFL1 PE=1 SV=3	KEDLVFIFWAPESAPLK	3	1	1990.07	664.028	0.61	20			0.00165393	2		1			K.KEDLVFIFWAPESAPLK.S	[96-112]	Not Used	Not Used
	P23528	Cofilin-1 OS=Homo sapiens OX=9606 GN=CFL1 PE=1 SV=3	ESKKEDLVFIFWAPESAPLK	1	2	2334.24	778.751	0.13	1			0.00456775	2		1			K.ESKKEDLVFIFWAPESAPLK.S	[93-112]	Not Used	Not Used
P02042	Hemoglobin subunit delta OS=Homo sapiens OX=9606 GN=HBD PE=1 SV=2	72	147	16	8.05	0	1679	1	3	10	85	3.65901e+06	3	0.0240998
	Master Protein Accessions	Master Protein Descriptions	Sequence	# PSMs	# Missed Cleavages	Theo. MH+ [Da]	m/z [Da] (by Search Engine): Mascot	DeltaM [ppm] (by Search Engine): Mascot	Ions Score (by Search Engine): Mascot	Top Apex RT [min]	Modifications	Qvality q-value	# Proteins		# Protein Groups	Abundance: F1764: n/a, Sample, n/a, n/a	Abundances Count: F1764: n/a, Sample, n/a, n/a	Sequence in Protein	Positions in Proteins	Quan Usage	Quan Ratio Usage
	P02042	Hemoglobin subunit delta OS=Homo sapiens OX=9606 GN=HBD PE=1 SV=2	NFGKEFTPQMQAAYQK	4	1	1887.91	944.457	0.47	55	31.1		0.00165393	1		1	1.80096e+06	2	R.NFGKEFTPQMQAAYQK.V	[118-133]	Used	Used
	P02042; P68871	Hemoglobin subunit delta OS=Homo sapiens OX=9606 GN=HBD PE=1 SV=2 Hemoglobin subunit beta OS=Homo sapiens OX=9606 GN=HBB PE=1 SV=2	LLVVYPWTQR	2	0	1274.73	637.866	-0.03	27	46.63		0.00165393	5		2	14962752	1	R.LLVVYPWTQR.F	[32-41]	Not Used	Not Used
	P02042; P68871	Hemoglobin subunit delta OS=Homo sapiens OX=9606 GN=HBD PE=1 SV=2 Hemoglobin subunit beta OS=Homo sapiens OX=9606 GN=HBB PE=1 SV=2	VLGAFSDGLAHLDNLK	9	0	1669.89	835.449	-0.14	59	45.87		0.00165393	2		2	2.48662e+07	3	K.VLGAFSDGLAHLDNLK.G	[68-83]	Not Used	Not Used
	P02042	Hemoglobin subunit delta OS=Homo sapiens OX=9606 GN=HBD PE=1 SV=2	VNVDAVGGEALGR	1	0	1256.66	628.832	-2.22	17	28.42		0.00165393	1		1	1.59337e+06	1	K.VNVDAVGGEALGR.L	[19-31]	Used	Used
	P02042; P68871	Hemoglobin subunit delta OS=Homo sapiens OX=9606 GN=HBD PE=1 SV=2 Hemoglobin subunit beta OS=Homo sapiens OX=9606 GN=HBB PE=1 SV=2	VHLTPEEK	9	0	952.51	476.759	-0.07	37	17.12		0.00165393	2		2	221190173	2	M.VHLTPEEK.T	[2-9]	Not Used	Not Used
	P02042; P68871	Hemoglobin subunit delta OS=Homo sapiens OX=9606 GN=HBD PE=1 SV=2 Hemoglobin subunit beta OS=Homo sapiens OX=9606 GN=HBB PE=1 SV=2	VVAGVANALAHK	5	0	1149.67	575.34	-0.56	55	23.93		0.00165393	2		2	27056082	1	K.VVAGVANALAHK.Y	[134-145]	Not Used	Not Used
	P02042; P68871	Hemoglobin subunit delta OS=Homo sapiens OX=9606 GN=HBD PE=1 SV=2 Hemoglobin subunit beta OS=Homo sapiens OX=9606 GN=HBB PE=1 SV=2	VVAGVANALAHKYH	38	1	1449.8	725.401	-1.07	80	26.7		0.00165393	2		2	1.40032e+08	7	K.VVAGVANALAHKYH.-	[134-147]	Not Used	Not Used
	P02042	Hemoglobin subunit delta OS=Homo sapiens OX=9606 GN=HBD PE=1 SV=2	FFESFGDLSSPDAVMGNPK	3	0	2044.93	1022.97	0.82	87	48.26		0.00165393	1		1	264685	1	R.FFESFGDLSSPDAVMGNPK.V	[42-60]	Used	Used
	P02042; P68871	Hemoglobin subunit delta OS=Homo sapiens OX=9606 GN=HBD PE=1 SV=2 Hemoglobin subunit beta OS=Homo sapiens OX=9606 GN=HBB PE=1 SV=2	KVLGAFSDGLAHLDNLK	9	1	1797.99	899.496	-0.67	68	43.09		0.00165393	2		2	9.42747e+06	2	K.KVLGAFSDGLAHLDNLK.G	[67-83]	Not Used	Not Used
	P02042; P68871	Hemoglobin subunit delta OS=Homo sapiens OX=9606 GN=HBD PE=1 SV=2 Hemoglobin subunit beta OS=Homo sapiens OX=9606 GN=HBB PE=1 SV=2	LHVDPENFR	5	0	1126.56	563.786	0	17	26.51		0.0024483	2		2	13018737	1	K.LHVDPENFR.L	[97-105]	Not Used	Not Used
P13987	CD59 glycoprotein OS=Homo sapiens OX=9606 GN=CD59 PE=1 SV=1	25	128	14.2	6.48	0	147	1	3	3	6	3.52494e+06	3	0.00170116
	Master Protein Accessions	Master Protein Descriptions	Sequence	# PSMs	# Missed Cleavages	Theo. MH+ [Da]	m/z [Da] (by Search Engine): Mascot	DeltaM [ppm] (by Search Engine): Mascot	Ions Score (by Search Engine): Mascot	Top Apex RT [min]	Modifications	Qvality q-value	# Proteins		# Protein Groups	Abundance: F1764: n/a, Sample, n/a, n/a	Abundances Count: F1764: n/a, Sample, n/a, n/a	Sequence in Protein	Positions in Proteins	Quan Usage	Quan Ratio Usage
	P13987	CD59 glycoprotein OS=Homo sapiens OX=9606 GN=CD59 PE=1 SV=1	LRENELTYYCCK	2	1	1648.75	824.877	0.64	58	25.78	2xCarbamidomethyl [C10; C11]	0.00165393	1		1	813163	1	R.LRENELTYYCCK.K	[79-90]	Used	Used
	P13987	CD59 glycoprotein OS=Homo sapiens OX=9606 GN=CD59 PE=1 SV=1	FEHCNFNDVTTR	3	0	1539.66	770.336	0.09	50	23.27	1xCarbamidomethyl [C4]	0.00165393	1		1	1.42988e+06	2	K.FEHCNFNDVTTR.L	[67-78]	Used	Used
	P13987	CD59 glycoprotein OS=Homo sapiens OX=9606 GN=CD59 PE=1 SV=1	AGLQVYNK	1	0	892.489	446.748	0.4	21	20.68		0.00165393	1		1	1.2819e+06	1	K.AGLQVYNK.C	[56-63]	Used	Used
O15145	Actin-related protein 2/3 complex subunit 3 OS=Homo sapiens OX=9606 GN=ARPC3 PE=1 SV=3	13	178	20.5	8.59	0	100	1	2	2	5	3.50847e+06	2	0.00141764
	Master Protein Accessions	Master Protein Descriptions	Sequence	# PSMs	# Missed Cleavages	Theo. MH+ [Da]	m/z [Da] (by Search Engine): Mascot	DeltaM [ppm] (by Search Engine): Mascot	Ions Score (by Search Engine): Mascot	Top Apex RT [min]	Modifications	Qvality q-value	# Proteins		# Protein Groups	Abundance: F1764: n/a, Sample, n/a, n/a	Abundances Count: F1764: n/a, Sample, n/a, n/a	Sequence in Protein	Positions in Proteins	Quan Usage	Quan Ratio Usage
	O15145	Actin-related protein 2/3 complex subunit 3 OS=Homo sapiens OX=9606 GN=ARPC3 PE=1 SV=3	PAYHSSLMDPDTK	3	0	1461.67	731.338	1.08	60	22.9		0.00165393	1		1	2774950	2	M.PAYHSSLMDPDTK.L	[2-14]	Used	Used
	O15145	Actin-related protein 2/3 complex subunit 3 OS=Homo sapiens OX=9606 GN=ARPC3 PE=1 SV=3	VFDPQNDKPSK	2	0	1274.64	637.823	0.19	30	17.7		0.00165393	1		1	733525	1	K.VFDPQNDKPSK.W	[148-158]	Used	Used
P80188	Neutrophil gelatinase-associated lipocalin OS=Homo sapiens OX=9606 GN=LCN2 PE=1 SV=2	38	198	22.6	8.91	0	187	1	5	5	8	3382828	4	0.00226822
	Master Protein Accessions	Master Protein Descriptions	Sequence	# PSMs	# Missed Cleavages	Theo. MH+ [Da]	m/z [Da] (by Search Engine): Mascot	DeltaM [ppm] (by Search Engine): Mascot	Ions Score (by Search Engine): Mascot	Top Apex RT [min]	Modifications	Qvality q-value	# Proteins		# Protein Groups	Abundance: F1764: n/a, Sample, n/a, n/a	Abundances Count: F1764: n/a, Sample, n/a, n/a	Sequence in Protein	Positions in Proteins	Quan Usage	Quan Ratio Usage
	P80188	Neutrophil gelatinase-associated lipocalin OS=Homo sapiens OX=9606 GN=LCN2 PE=1 SV=2	SLGLPENHIVFPVPIDQCIDG	2	0	2320.16	1160.58	-1.1	32	54.6	1xCarbamidomethyl [C18]	0.00165393	1		1	358943	1	K.SLGLPENHIVFPVPIDQCIDG.-	[178-198]	Used	Used
	P80188	Neutrophil gelatinase-associated lipocalin OS=Homo sapiens OX=9606 GN=LCN2 PE=1 SV=2	VPLQQNFQDNQFQGK	2	0	1790.88	895.944	-0.26	60	30.16		0.00165393	1		1	1.68694e+06	1	K.VPLQQNFQDNQFQGK.W	[36-50]	Used	Used
	P80188	Neutrophil gelatinase-associated lipocalin OS=Homo sapiens OX=9606 GN=LCN2 PE=1 SV=2	TFVPGCQPGEFTLGNIK	2	0	1864.93	932.967	-0.05	40	43.73	1xCarbamidomethyl [C6]	0.00165393	1		1	411828	1	R.TFVPGCQPGEFTLGNIK.S	[102-118]	Used	Used
	P80188	Neutrophil gelatinase-associated lipocalin OS=Homo sapiens OX=9606 GN=LCN2 PE=1 SV=2	ELTSELKENFIR	1	1	1478.78	739.896	0.21	45			0.00165393	1		1			K.ELTSELKENFIR.F	[163-174]	Not Used	Not Used
	P80188	Neutrophil gelatinase-associated lipocalin OS=Homo sapiens OX=9606 GN=LCN2 PE=1 SV=2	SYPGLTSYLVR	1	0	1255.67	628.337	-0.4	7	42.27		0.00535372	1		1	925115	1	K.SYPGLTSYLVR.V	[119-129]	Used	Used
P12814	Alpha-actinin-1 OS=Homo sapiens OX=9606 GN=ACTN1 PE=1 SV=2	10	892	103	5.41	0	328	1	5	6	14	3.28179e+06	4	0.00396938
	Master Protein Accessions	Master Protein Descriptions	Sequence	# PSMs	# Missed Cleavages	Theo. MH+ [Da]	m/z [Da] (by Search Engine): Mascot	DeltaM [ppm] (by Search Engine): Mascot	Ions Score (by Search Engine): Mascot	Top Apex RT [min]	Modifications	Qvality q-value	# Proteins		# Protein Groups	Abundance: F1764: n/a, Sample, n/a, n/a	Abundances Count: F1764: n/a, Sample, n/a, n/a	Sequence in Protein	Positions in Proteins	Quan Usage	Quan Ratio Usage
	P12814	Alpha-actinin-1 OS=Homo sapiens OX=9606 GN=ACTN1 PE=1 SV=2	QKDYETATLSEIK	2	1	1525.77	763.391	0.09	50	27.62		0.00165393	1		1	543438	1	R.QKDYETATLSEIK.A	[419-431]	Used	Used
	P12814	Alpha-actinin-1 OS=Homo sapiens OX=9606 GN=ACTN1 PE=1 SV=2	MLDAEDIVGTARPDEK	4	0	1759.85	880.43	-0.02	71	35.21		0.00165393	1		1	1.33242e+06	2	K.MLDAEDIVGTARPDEK.A	[221-236]	Used	Used
	P12814	Alpha-actinin-1 OS=Homo sapiens OX=9606 GN=ACTN1 PE=1 SV=2	IDQLEGDHQLIQEALIFDNK	2	0	2339.19	780.401	0.54	37			0.00165393	1		1			K.IDQLEGDHQLIQEALIFDNK.H	[685-704]	Not Used	Not Used
	P12814	Alpha-actinin-1 OS=Homo sapiens OX=9606 GN=ACTN1 PE=1 SV=2	AGTQIENIEEDFRDGLK	3	1	1934.95	967.977	0.52	58	46.62		0.00165393	1		1	878800	2	K.AGTQIENIEEDFRDGLK.L	[48-64]	Used	Used
	P12814	Alpha-actinin-1 OS=Homo sapiens OX=9606 GN=ACTN1 PE=1 SV=2	LAILGIHNEVSK	2	0	1293.75	647.38	-0.2	50	33.42		0.00165393	1		1	527130	1	R.LAILGIHNEVSK.I	[566-577]	Used	Used
	P12814; O43707	Alpha-actinin-1 OS=Homo sapiens OX=9606 GN=ACTN1 PE=1 SV=2 Alpha-actinin-4 OS=Homo sapiens OX=9606 GN=ACTN4 PE=1 SV=2	EGLLLWCQR	1	0	1174.6	587.806	0.36	32	45.09	1xCarbamidomethyl [C7]	0.0024483	4		2	195895	1	K.EGLLLWCQR.K	[148-156]	Not Used	Not Used
O95498	Pantetheine hydrolase VNN2 OS=Homo sapiens OX=9606 GN=VNN2 PE=1 SV=3	11	520	58.5	6.52	0	151	1	3	3	6	3.25762e+06	3	0.00170116
	Master Protein Accessions	Master Protein Descriptions	Sequence	# PSMs	# Missed Cleavages	Theo. MH+ [Da]	m/z [Da] (by Search Engine): Mascot	DeltaM [ppm] (by Search Engine): Mascot	Ions Score (by Search Engine): Mascot	Top Apex RT [min]	Modifications	Qvality q-value	# Proteins		# Protein Groups	Abundance: F1764: n/a, Sample, n/a, n/a	Abundances Count: F1764: n/a, Sample, n/a, n/a	Sequence in Protein	Positions in Proteins	Quan Usage	Quan Ratio Usage
	O95498	Pantetheine hydrolase VNN2 OS=Homo sapiens OX=9606 GN=VNN2 PE=1 SV=3	IIVTPEDALYGWK	2	0	1504.8	752.906	-0.38	38	48.89		0.00165393	1		1	1.39174e+06	1	R.IIVTPEDALYGWK.F	[75-87]	Used	Used
	O95498	Pantetheine hydrolase VNN2 OS=Homo sapiens OX=9606 GN=VNN2 PE=1 SV=3	ETVFPYLEDIPDPQVNWIPCQDPHR	2	0	3065.45	1022.49	0.32	41	56.11	1xCarbamidomethyl [C20]	0.00165393	1		1	872848	1	R.ETVFPYLEDIPDPQVNWIPCQDPHR.F	[91-115]	Used	Used
	O95498	Pantetheine hydrolase VNN2 OS=Homo sapiens OX=9606 GN=VNN2 PE=1 SV=3	DNSIYVLANLGDKKPCNSR	2	1	2164.08	722.032	0.29	38	36.68	1xCarbamidomethyl [C16]	0.00165393	1		1	993027	1	K.DNSIYVLANLGDKKPCNSR.D	[131-149]	Used	Used
P14780	Matrix metalloproteinase-9 OS=Homo sapiens OX=9606 GN=MMP9 PE=1 SV=3	13	707	78.4	6.06	0	267	1	6	6	11	3.14074e+06	6	0.0031188
	Master Protein Accessions	Master Protein Descriptions	Sequence	# PSMs	# Missed Cleavages	Theo. MH+ [Da]	m/z [Da] (by Search Engine): Mascot	DeltaM [ppm] (by Search Engine): Mascot	Ions Score (by Search Engine): Mascot	Top Apex RT [min]	Modifications	Qvality q-value	# Proteins		# Protein Groups	Abundance: F1764: n/a, Sample, n/a, n/a	Abundances Count: F1764: n/a, Sample, n/a, n/a	Sequence in Protein	Positions in Proteins	Quan Usage	Quan Ratio Usage
	P14780	Matrix metalloproteinase-9 OS=Homo sapiens OX=9606 GN=MMP9 PE=1 SV=3	QLSLPETGELDSATLK	1	0	1701.89	851.449	-0.33	46	40.25		0.00165393	1		1	348568	1	K.QLSLPETGELDSATLK.A	[77-92]	Used	Used
	P14780	Matrix metalloproteinase-9 OS=Homo sapiens OX=9606 GN=MMP9 PE=1 SV=3	SDGLPWCSTTANYDTDDRFGFCPSER	2	1	3054.26	1018.76	1.66	51	44.81	2xCarbamidomethyl [C7; C22]	0.00165393	1		1	375036	1	R.SDGLPWCSTTANYDTDDRFGFCPSER.L	[250-275]	Used	Used
	P14780	Matrix metalloproteinase-9 OS=Homo sapiens OX=9606 GN=MMP9 PE=1 SV=3	LWCATTSNFDSDKK	2	1	1672.76	836.885	-0.43	60	27.49	1xCarbamidomethyl [C3]	0.00165393	1		1	403356	1	R.LWCATTSNFDSDKK.W	[371-384]	Used	Used
	P14780	Matrix metalloproteinase-9 OS=Homo sapiens OX=9606 GN=MMP9 PE=1 SV=3	SLGPALLLLQK	2	0	1152.74	576.871	0.16	52	49.76		0.00165393	1		1	862945	1	K.SLGPALLLLQK.Q	[66-76]	Used	Used
	P14780	Matrix metalloproteinase-9 OS=Homo sapiens OX=9606 GN=MMP9 PE=1 SV=3	GSRPQGPFLIADKWPALPR	2	1	2106.16	702.726	1.17	43	47.03		0.00165393	1		1	435619	1	R.GSRPQGPFLIADKWPALPR.K	[547-565]	Used	Used
	P14780	Matrix metalloproteinase-9 OS=Homo sapiens OX=9606 GN=MMP9 PE=1 SV=3	AVIDDAFAR	2	0	977.505	489.256	0.19	7	29.89		0.00456775	1		1	715219	1	R.AVIDDAFAR.A	[135-143]	Used	Used
Q99497	Parkinson disease protein 7 OS=Homo sapiens OX=9606 GN=PARK7 PE=1 SV=2	24	189	19.9	6.79	0	192	1	3	3	8	2.95494e+06	2	0.00226822
	Master Protein Accessions	Master Protein Descriptions	Sequence	# PSMs	# Missed Cleavages	Theo. MH+ [Da]	m/z [Da] (by Search Engine): Mascot	DeltaM [ppm] (by Search Engine): Mascot	Ions Score (by Search Engine): Mascot	Top Apex RT [min]	Modifications	Qvality q-value	# Proteins		# Protein Groups	Abundance: F1764: n/a, Sample, n/a, n/a	Abundances Count: F1764: n/a, Sample, n/a, n/a	Sequence in Protein	Positions in Proteins	Quan Usage	Quan Ratio Usage
	Q99497	Parkinson disease protein 7 OS=Homo sapiens OX=9606 GN=PARK7 PE=1 SV=2	VTVAGLAGKDPVQCSR	4	1	1657.87	553.294	-0.41	46	26.94	1xCarbamidomethyl [C14]	0.00165393	1		1	2.26178e+06	2	K.VTVAGLAGKDPVQCSR.D	[33-48]	Used	Used
	Q99497	Parkinson disease protein 7 OS=Homo sapiens OX=9606 GN=PARK7 PE=1 SV=2	DVVICPDASLEDAKK	2	1	1659.83	830.416	-0.59	39	29.11	1xCarbamidomethyl [C5]	0.00165393	1		1	693167	1	R.DVVICPDASLEDAKK.E	[49-63]	Used	Used
	Q99497	Parkinson disease protein 7 OS=Homo sapiens OX=9606 GN=PARK7 PE=1 SV=2	GAEEMETVIPVDVMR	2	0	1675.8	838.405	-0.09	11			0.0024483	1		1			K.GAEEMETVIPVDVMR.R	[13-27]	Not Used	Not Used
P17931	Galectin-3 OS=Homo sapiens OX=9606 GN=LGALS3 PE=1 SV=5	14	250	26.1	8.56	0	98	1	3	3	5	2.83906e+06	3	0.00141764
	Master Protein Accessions	Master Protein Descriptions	Sequence	# PSMs	# Missed Cleavages	Theo. MH+ [Da]	m/z [Da] (by Search Engine): Mascot	DeltaM [ppm] (by Search Engine): Mascot	Ions Score (by Search Engine): Mascot	Top Apex RT [min]	Modifications	Qvality q-value	# Proteins		# Protein Groups	Abundance: F1764: n/a, Sample, n/a, n/a	Abundances Count: F1764: n/a, Sample, n/a, n/a	Sequence in Protein	Positions in Proteins	Quan Usage	Quan Ratio Usage
	P17931	Galectin-3 OS=Homo sapiens OX=9606 GN=LGALS3 PE=1 SV=5	IQVLVEPDHFK	2	0	1324.73	662.866	-0.33	48	32.85		0.00165393	1		1	1.01959e+06	1	K.IQVLVEPDHFK.V	[200-210]	Used	Used
	P17931	Galectin-3 OS=Homo sapiens OX=9606 GN=LGALS3 PE=1 SV=5	QSVFPFESGKPFK	2	0	1497.77	749.391	1.22	30	39.68		0.0024483	1		1	591899	1	R.QSVFPFESGKPFK.I	[187-199]	Used	Used
	P17931	Galectin-3 OS=Homo sapiens OX=9606 GN=LGALS3 PE=1 SV=5	GNDVAFHFNPR	1	0	1273.61	425.208	0.88	4	29.5		0.00839836	1		1	1.22757e+06	1	R.GNDVAFHFNPR.F	[152-162]	Used	Used
O75594	Peptidoglycan recognition protein 1 OS=Homo sapiens OX=9606 GN=PGLYRP1 PE=1 SV=1	28	196	21.7	8.59	0	93	1	3	3	5	2.82135e+06	3	0.00141764
	Master Protein Accessions	Master Protein Descriptions	Sequence	# PSMs	# Missed Cleavages	Theo. MH+ [Da]	m/z [Da] (by Search Engine): Mascot	DeltaM [ppm] (by Search Engine): Mascot	Ions Score (by Search Engine): Mascot	Top Apex RT [min]	Modifications	Qvality q-value	# Proteins		# Protein Groups	Abundance: F1764: n/a, Sample, n/a, n/a	Abundances Count: F1764: n/a, Sample, n/a, n/a	Sequence in Protein	Positions in Proteins	Quan Usage	Quan Ratio Usage
	O75594	Peptidoglycan recognition protein 1 OS=Homo sapiens OX=9606 GN=PGLYRP1 PE=1 SV=1	YVVVSHTAGSSCNTPASCQQQAR	2	0	2508.14	836.717	-0.02	45	18.48	2xCarbamidomethyl [C12; C18]	0.00165393	1		1	993974	1	R.YVVVSHTAGSSCNTPASCQQQAR.N	[56-78]	Used	Used
	O75594	Peptidoglycan recognition protein 1 OS=Homo sapiens OX=9606 GN=PGLYRP1 PE=1 SV=1	AAQGLLACGVAQGALR	2	0	1555.84	778.423	0.88	39	36.93	1xCarbamidomethyl [C8]	0.00165393	1		1	382730	1	R.AAQGLLACGVAQGALR.S	[147-162]	Used	Used
	O75594	Peptidoglycan recognition protein 1 OS=Homo sapiens OX=9606 GN=PGLYRP1 PE=1 SV=1	ALASECAQHLSLPLR	1	0	1665.87	555.963	0.1	8	35.11	1xCarbamidomethyl [C6]	0.00411958	1		1	1.44465e+06	1	K.ALASECAQHLSLPLR.Y	[41-55]	Used	Used
P52907	F-actin-capping protein subunit alpha-1 OS=Homo sapiens OX=9606 GN=CAPZA1 PE=1 SV=3	15	286	32.9	5.69	0	108	1	3	3	7	2.72102e+06	3	0.00198469
	Master Protein Accessions	Master Protein Descriptions	Sequence	# PSMs	# Missed Cleavages	Theo. MH+ [Da]	m/z [Da] (by Search Engine): Mascot	DeltaM [ppm] (by Search Engine): Mascot	Ions Score (by Search Engine): Mascot	Top Apex RT [min]	Modifications	Qvality q-value	# Proteins		# Protein Groups	Abundance: F1764: n/a, Sample, n/a, n/a	Abundances Count: F1764: n/a, Sample, n/a, n/a	Sequence in Protein	Positions in Proteins	Quan Usage	Quan Ratio Usage
	P52907	F-actin-capping protein subunit alpha-1 OS=Homo sapiens OX=9606 GN=CAPZA1 PE=1 SV=3	LLLNNDNLLR	1	0	1197.69	599.352	0.8	39	40.33		0.00165393	2		1	351126	1	R.LLLNNDNLLR.E	[38-47]	Used	Used
	P52907	F-actin-capping protein subunit alpha-1 OS=Homo sapiens OX=9606 GN=CAPZA1 PE=1 SV=3	FITHAPPGEFNEVFNDVR	2	0	2089.01	697.009	-0.16	25	43.42		0.00165393	1		1	326494	1	K.FITHAPPGEFNEVFNDVR.L	[20-37]	Used	Used
	P52907	F-actin-capping protein subunit alpha-1 OS=Homo sapiens OX=9606 GN=CAPZA1 PE=1 SV=3	ADFDDRVSDEEKVR	4	2	1722.79	574.936	-0.31	37	26.58	1xAcetyl [N-Term]	0.00165393	1		1	2.0434e+06	2	M.ADFDDRVSDEEKVR.I	[2-15]	Used	Used
Q01518	Adenylyl cyclase-associated protein 1 OS=Homo sapiens OX=9606 GN=CAP1 PE=1 SV=5	11	475	51.9	8.06	0	84	1	4	4	6	2.71625e+06	3	0.00170116
	Master Protein Accessions	Master Protein Descriptions	Sequence	# PSMs	# Missed Cleavages	Theo. MH+ [Da]	m/z [Da] (by Search Engine): Mascot	DeltaM [ppm] (by Search Engine): Mascot	Ions Score (by Search Engine): Mascot	Top Apex RT [min]	Modifications	Qvality q-value	# Proteins		# Protein Groups	Abundance: F1764: n/a, Sample, n/a, n/a	Abundances Count: F1764: n/a, Sample, n/a, n/a	Sequence in Protein	Positions in Proteins	Quan Usage	Quan Ratio Usage
	Q01518	Adenylyl cyclase-associated protein 1 OS=Homo sapiens OX=9606 GN=CAP1 PE=1 SV=5	VENQENVSNLVIEDTELKQVAYIYK	1	1	2938.5	980.174	1.01	38			0.00165393	1		1			R.VENQENVSNLVIEDTELKQVAYIYK.C	[331-355]	Not Used	Not Used
	Q01518	Adenylyl cyclase-associated protein 1 OS=Homo sapiens OX=9606 GN=CAP1 PE=1 SV=5	VPTISINKTDGCHAYLSK	2	1	2004.02	668.679	0.3	25	27.94	1xCarbamidomethyl [C12]	0.00165393	1		1	863154	1	K.VPTISINKTDGCHAYLSK.N	[405-422]	Used	Used
	Q01518	Adenylyl cyclase-associated protein 1 OS=Homo sapiens OX=9606 GN=CAP1 PE=1 SV=5	INSITVDNCKK	2	1	1291.67	646.338	0.86	16	18.02	1xCarbamidomethyl [C9]	0.00339245	1		1	385854	1	K.INSITVDNCKK.L	[367-377]	Used	Used
	Q01518	Adenylyl cyclase-associated protein 1 OS=Homo sapiens OX=9606 GN=CAP1 PE=1 SV=5	TDGCHAYLSK	1	0	1151.51	576.262	1.22	25	17.02	1xCarbamidomethyl [C4]	0.00456775	1		1	1.46724e+06	1	K.TDGCHAYLSK.N	[413-422]	Used	Used
P20160	Azurocidin OS=Homo sapiens OX=9606 GN=AZU1 PE=1 SV=3	9	251	26.9	9.5	0	100	1	2	2	3	2654198	2	0.000850581
	Master Protein Accessions	Master Protein Descriptions	Sequence	# PSMs	# Missed Cleavages	Theo. MH+ [Da]	m/z [Da] (by Search Engine): Mascot	DeltaM [ppm] (by Search Engine): Mascot	Ions Score (by Search Engine): Mascot	Top Apex RT [min]	Modifications	Qvality q-value	# Proteins		# Protein Groups	Abundance: F1764: n/a, Sample, n/a, n/a	Abundances Count: F1764: n/a, Sample, n/a, n/a	Sequence in Protein	Positions in Proteins	Quan Usage	Quan Ratio Usage
	P20160	Azurocidin OS=Homo sapiens OX=9606 GN=AZU1 PE=1 SV=3	QFPFLASIQNQGR	2	0	1505.79	753.397	0.84	52	47.99		0.00165393	1		1	641443	1	R.QFPFLASIQNQGR.H	[37-49]	Used	Used
	P20160	Azurocidin OS=Homo sapiens OX=9606 GN=AZU1 PE=1 SV=3	CQVAGWGSQR	1	0	1148.53	574.767	-0.55	42	21.9	1xCarbamidomethyl [C1]	0.00165393	1		1	2.01276e+06	1	R.CQVAGWGSQR.S	[149-158]	Used	Used
P51858	Hepatoma-derived growth factor OS=Homo sapiens OX=9606 GN=HDGF PE=1 SV=1	18	240	26.8	4.73	0	55	1	3	3	5	2.59464e+06	3	0.00141764
	Master Protein Accessions	Master Protein Descriptions	Sequence	# PSMs	# Missed Cleavages	Theo. MH+ [Da]	m/z [Da] (by Search Engine): Mascot	DeltaM [ppm] (by Search Engine): Mascot	Ions Score (by Search Engine): Mascot	Top Apex RT [min]	Modifications	Qvality q-value	# Proteins		# Protein Groups	Abundance: F1764: n/a, Sample, n/a, n/a	Abundances Count: F1764: n/a, Sample, n/a, n/a	Sequence in Protein	Positions in Proteins	Quan Usage	Quan Ratio Usage
	P51858	Hepatoma-derived growth factor OS=Homo sapiens OX=9606 GN=HDGF PE=1 SV=1	EDAEAPGIRDHESL	2	1	1538.71	769.858	-0.04	35	23.52		0.00165393	1		1	1.17974e+06	1	K.EDAEAPGIRDHESL.-	[227-240]	Used	Used
	P51858	Hepatoma-derived growth factor OS=Homo sapiens OX=9606 GN=HDGF PE=1 SV=1	DLFPYEESKEK	2	1	1384.66	692.835	-0.14	21	30.11		0.00411958	1		1	961742	1	K.DLFPYEESKEK.F	[62-72]	Used	Used
	P51858	Hepatoma-derived growth factor OS=Homo sapiens OX=9606 GN=HDGF PE=1 SV=1	KGFSEGLWEIENNPTVK	1	1	1947.98	649.999	0.82	21	41.17		0.00608856	1		1	453155	1	R.KGFSEGLWEIENNPTVK.A	[80-96]	Used	Used
P61158	Actin-related protein 3 OS=Homo sapiens OX=9606 GN=ACTR3 PE=1 SV=3	21	418	47.3	5.88	0	277	1	7	7	11	2.58397e+06	6	0.0031188
	Master Protein Accessions	Master Protein Descriptions	Sequence	# PSMs	# Missed Cleavages	Theo. MH+ [Da]	m/z [Da] (by Search Engine): Mascot	DeltaM [ppm] (by Search Engine): Mascot	Ions Score (by Search Engine): Mascot	Top Apex RT [min]	Modifications	Qvality q-value	# Proteins		# Protein Groups	Abundance: F1764: n/a, Sample, n/a, n/a	Abundances Count: F1764: n/a, Sample, n/a, n/a	Sequence in Protein	Positions in Proteins	Quan Usage	Quan Ratio Usage
	P61158	Actin-related protein 3 OS=Homo sapiens OX=9606 GN=ACTR3 PE=1 SV=3	LPACVVDCGTGYTK	2	0	1540.71	770.86	-0.19	30	26.64	2xCarbamidomethyl [C4; C8]	0.00165393	1		1	299455	1	R.LPACVVDCGTGYTK.L	[5-18]	Used	Used
	P61158	Actin-related protein 3 OS=Homo sapiens OX=9606 GN=ACTR3 PE=1 SV=3	DREVGIPPEQSLETAK	1	1	1768.91	884.959	1.25	34	26.47		0.00165393	1		1	492722	1	R.DREVGIPPEQSLETAK.A	[210-225]	Used	Used
	P61158	Actin-related protein 3 OS=Homo sapiens OX=9606 GN=ACTR3 PE=1 SV=3	KDYEEIGPSICR	2	1	1466.69	733.85	-0.51	51	24.96	1xCarbamidomethyl [C11]	0.00165393	1		1	480807	1	K.KDYEEIGPSICR.H	[398-409]	Used	Used
	P61158	Actin-related protein 3 OS=Homo sapiens OX=9606 GN=ACTR3 PE=1 SV=3	AGRLPACVVDCGTGYTK	2	1	1866.88	933.946	1.01	104	33.82	1xAcetyl [N-Term]; 2xCarbamidomethyl [C7; C11]	0.00165393	1		1	430556	1	M.AGRLPACVVDCGTGYTK.L	[2-18]	Used	Used
	P61158	Actin-related protein 3 OS=Homo sapiens OX=9606 GN=ACTR3 PE=1 SV=3	GVDDLDFFIGDEAIEKPTYATK	1	0	2444.19	815.4	-0.51	30			0.00165393	1		1			K.GVDDLDFFIGDEAIEKPTYATK.W	[54-75]	Not Used	Not Used
	P61158	Actin-related protein 3 OS=Homo sapiens OX=9606 GN=ACTR3 PE=1 SV=3	LKLSEELSGGR	2	1	1188.66	594.833	-0.15	18	26.57		0.0024483	1		1	731968	1	R.LKLSEELSGGR.L	[347-357]	Used	Used
	P61158	Actin-related protein 3 OS=Homo sapiens OX=9606 GN=ACTR3 PE=1 SV=3	YSYVCPDLVK	1	0	1243.6	622.305	0.56	19	32.74	1xCarbamidomethyl [C5]	0.00535372	1		1	148463	1	R.YSYVCPDLVK.E	[231-240]	Used	Used
Q99536	Synaptic vesicle membrane protein VAT-1 homolog OS=Homo sapiens OX=9606 GN=VAT1 PE=1 SV=2	7	393	41.9	6.29	0.003	27	1	2	2	3	2.57127e+06	2	0.000850581
	Master Protein Accessions	Master Protein Descriptions	Sequence	# PSMs	# Missed Cleavages	Theo. MH+ [Da]	m/z [Da] (by Search Engine): Mascot	DeltaM [ppm] (by Search Engine): Mascot	Ions Score (by Search Engine): Mascot	Top Apex RT [min]	Modifications	Qvality q-value	# Proteins		# Protein Groups	Abundance: F1764: n/a, Sample, n/a, n/a	Abundances Count: F1764: n/a, Sample, n/a, n/a	Sequence in Protein	Positions in Proteins	Quan Usage	Quan Ratio Usage
	Q99536	Synaptic vesicle membrane protein VAT-1 homolog OS=Homo sapiens OX=9606 GN=VAT1 PE=1 SV=2	LQSRPAAPPAPGPGQLTLR	1	0	1927.09	643.034	-0.29	15	29.54		0.00411958	1		1	376800	1	K.LQSRPAAPPAPGPGQLTLR.L	[64-82]	Used	Used
	Q99536	Synaptic vesicle membrane protein VAT-1 homolog OS=Homo sapiens OX=9606 GN=VAT1 PE=1 SV=2	GYNLLKPMGK	2	0	1120.62	560.813	0.03	29	31.01		0.00456775	1		1	2194465	1	K.GYNLLKPMGK.V	[272-281]	Used	Used
Q9Y490	Talin-1 OS=Homo sapiens OX=9606 GN=TLN1 PE=1 SV=3	5	2541	269.6	6.07	0	152	1	8	8	11	2.36522e+06	7	0.0031188
	Master Protein Accessions	Master Protein Descriptions	Sequence	# PSMs	# Missed Cleavages	Theo. MH+ [Da]	m/z [Da] (by Search Engine): Mascot	DeltaM [ppm] (by Search Engine): Mascot	Ions Score (by Search Engine): Mascot	Top Apex RT [min]	Modifications	Qvality q-value	# Proteins		# Protein Groups	Abundance: F1764: n/a, Sample, n/a, n/a	Abundances Count: F1764: n/a, Sample, n/a, n/a	Sequence in Protein	Positions in Proteins	Quan Usage	Quan Ratio Usage
	Q9Y490	Talin-1 OS=Homo sapiens OX=9606 GN=TLN1 PE=1 SV=3	QAAASATQTIAAAQHAASTPK	1	0	1995.03	665.68	0.19	42	27.81		0.00165393	1		1	415714	1	K.QAAASATQTIAAAQHAASTPK.A	[923-943]	Used	Used
	Q9Y490	Talin-1 OS=Homo sapiens OX=9606 GN=TLN1 PE=1 SV=3	LLAALLEDEGGSGRPLLQAAK	2	0	2122.19	708.067	0.12	27			0.00165393	1		1			K.LLAALLEDEGGSGRPLLQAAK.G	[593-613]	Not Used	Not Used
	Q9Y490	Talin-1 OS=Homo sapiens OX=9606 GN=TLN1 PE=1 SV=3	TMLESAGGLIQTAR	1	0	1447.76	724.382	0.08	27	38.74		0.00165393	1		1	293046	1	K.TMLESAGGLIQTAR.A	[1605-1618]	Used	Used
	Q9Y490	Talin-1 OS=Homo sapiens OX=9606 GN=TLN1 PE=1 SV=3	DPPSWSVLAGHSR	2	0	1408.7	704.852	-0.03	28	33.52		0.00165393	1		1	591223	1	R.DPPSWSVLAGHSR.T	[1626-1638]	Used	Used
	Q9Y490	Talin-1 OS=Homo sapiens OX=9606 GN=TLN1 PE=1 SV=3	AVEDEATKGTR	1	1	1176.59	588.797	0.23	24	15.45		0.00165393	1		1	326245	1	K.AVEDEATKGTR.A	[2134-2144]	Used	Used
	Q9Y490	Talin-1 OS=Homo sapiens OX=9606 GN=TLN1 PE=1 SV=3	AVAEQIPLLVQGVR	2	0	1492.88	746.946	0.08	55	45.39		0.00165393	1		1	237877	1	K.AVAEQIPLLVQGVR.G	[958-971]	Used	Used
	Q9Y490	Talin-1 OS=Homo sapiens OX=9606 GN=TLN1 PE=1 SV=3	GLAGAVSELLR	1	0	1085.63	543.32	0.83	26	48.78		0.0024483	1		1	136971	1	K.GLAGAVSELLR.S	[614-624]	Used	Used
	Q9Y490	Talin-1 OS=Homo sapiens OX=9606 GN=TLN1 PE=1 SV=3	ADAEGESDLENSRK	1	1	1520.68	760.845	0.24	36	16.53		0.00456775	1		1	364145	1	K.ADAEGESDLENSRK.L	[842-855]	Used	Used
Q16778	Histone H2B type 2-E OS=Homo sapiens OX=9606 GN=H2BC21 PE=1 SV=3	54	126	13.9	10.32	0	372	1	1	7	23	2.24396e+06	1	0.00652112
	Master Protein Accessions	Master Protein Descriptions	Sequence	# PSMs	# Missed Cleavages	Theo. MH+ [Da]	m/z [Da] (by Search Engine): Mascot	DeltaM [ppm] (by Search Engine): Mascot	Ions Score (by Search Engine): Mascot	Top Apex RT [min]	Modifications	Qvality q-value	# Proteins		# Protein Groups	Abundance: F1764: n/a, Sample, n/a, n/a	Abundances Count: F1764: n/a, Sample, n/a, n/a	Sequence in Protein	Positions in Proteins	Quan Usage	Quan Ratio Usage
	Q16778; Q5QNW6	Histone H2B type 2-E OS=Homo sapiens OX=9606 GN=H2BC21 PE=1 SV=3 Histone H2B type 2-F OS=Homo sapiens OX=9606 GN=H2BC18 PE=1 SV=3	AMGIMNSFVNDIFER	1	0	1775.81	888.408	-0.52	59		2xOxidation [M2; M5]	0.00165393	14		2			K.AMGIMNSFVNDIFER.I	[59-73]	Not Used	Not Used
	Q16778; Q5QNW6	Histone H2B type 2-E OS=Homo sapiens OX=9606 GN=H2BC21 PE=1 SV=3 Histone H2B type 2-F OS=Homo sapiens OX=9606 GN=H2BC18 PE=1 SV=3	AMGIMNSFVNDIFER	3	0	1759.81	880.41	-1.18	68	57.04	1xOxidation [M]	0.00165393	14		2	237443	1	K.AMGIMNSFVNDIFER.I	[59-73]	Not Used	Not Used
	Q16778; Q5QNW6	Histone H2B type 2-E OS=Homo sapiens OX=9606 GN=H2BC21 PE=1 SV=3 Histone H2B type 2-F OS=Homo sapiens OX=9606 GN=H2BC18 PE=1 SV=3	AMGIMNSFVNDIFER	2	0	1743.82	872.413	0.12	58	59.28		0.00165393	14		2	345265	1	K.AMGIMNSFVNDIFER.I	[59-73]	Not Used	Not Used
	Q16778; Q5QNW6	Histone H2B type 2-E OS=Homo sapiens OX=9606 GN=H2BC21 PE=1 SV=3 Histone H2B type 2-F OS=Homo sapiens OX=9606 GN=H2BC18 PE=1 SV=3	AVTKYTSSK	2	1	984.536	492.772	0.15	23	15.23		0.00165393	13		2	1.03106e+06	1	K.AVTKYTSSK.-	[118-126]	Not Used	Not Used
	Q16778; Q5QNW6	Histone H2B type 2-E OS=Homo sapiens OX=9606 GN=H2BC21 PE=1 SV=3 Histone H2B type 2-F OS=Homo sapiens OX=9606 GN=H2BC18 PE=1 SV=3	VLKQVHPDTGISSK	2	1	1508.84	754.926	1.05	31	20.28		0.0024483	15		2	564947	1	K.VLKQVHPDTGISSK.A	[45-58]	Not Used	Not Used
	Q16778	Histone H2B type 2-E OS=Homo sapiens OX=9606 GN=H2BC21 PE=1 SV=3	KESYSIYVYK	3	1	1279.66	640.331	-0.93	43	28.15		0.00411958	7		1	2.24396e+06	1	R.KESYSIYVYK.V	[35-44]	Used	Used
	Q16778; Q5QNW6	Histone H2B type 2-E OS=Homo sapiens OX=9606 GN=H2BC21 PE=1 SV=3 Histone H2B type 2-F OS=Homo sapiens OX=9606 GN=H2BC18 PE=1 SV=3	QVHPDTGISSK	2	0	1168.6	584.801	-0.19	22	16.26		0.00456775	15		2	39858664	1	K.QVHPDTGISSK.A	[48-58]	Not Used	Not Used
	Q16778; Q5QNW6	Histone H2B type 2-E OS=Homo sapiens OX=9606 GN=H2BC21 PE=1 SV=3 Histone H2B type 2-F OS=Homo sapiens OX=9606 GN=H2BC18 PE=1 SV=3	LAHYNKR	7	1	901.5	451.254	0.52	15	29.83		0.00608856	15		2	5.65698e+06	4	R.LAHYNKR.S	[81-87]	Not Used	Not Used
	Q16778; Q5QNW6	Histone H2B type 2-E OS=Homo sapiens OX=9606 GN=H2BC21 PE=1 SV=3 Histone H2B type 2-F OS=Homo sapiens OX=9606 GN=H2BC18 PE=1 SV=3	STITSREIQTAVR	1	1	1461.8	731.404	-1.06	16	23.99		0.00608856	13		2	615481	1	R.STITSREIQTAVR.L	[88-100]	Not Used	Not Used
P61586	Transforming protein RhoA OS=Homo sapiens OX=9606 GN=RHOA PE=1 SV=1	12	193	21.8	6.1	0.003	32	1	2	2	2	2.22296e+06	2	0.000567054
	Master Protein Accessions	Master Protein Descriptions	Sequence	# PSMs	# Missed Cleavages	Theo. MH+ [Da]	m/z [Da] (by Search Engine): Mascot	DeltaM [ppm] (by Search Engine): Mascot	Ions Score (by Search Engine): Mascot	Top Apex RT [min]	Modifications	Qvality q-value	# Proteins		# Protein Groups	Abundance: F1764: n/a, Sample, n/a, n/a	Abundances Count: F1764: n/a, Sample, n/a, n/a	Sequence in Protein	Positions in Proteins	Quan Usage	Quan Ratio Usage
	P61586	Transforming protein RhoA OS=Homo sapiens OX=9606 GN=RHOA PE=1 SV=1	DGVREVFEMATR	1	1	1409.68	705.346	0.86	24	39.07		0.00165393	1		1	1.2485e+06	1	K.DGVREVFEMATR.A	[165-176]	Used	Used
	P61586	Transforming protein RhoA OS=Homo sapiens OX=9606 GN=RHOA PE=1 SV=1	KLVIVGDGACGK	1	1	1216.67	608.84	0.86	31	22.35	1xCarbamidomethyl [C10]	0.00456775	2		1	974457	1	K.KLVIVGDGACGK.T	[7-18]	Used	Used
Q10588	ADP-ribosyl cyclase/cyclic ADP-ribose hydrolase 2 OS=Homo sapiens OX=9606 GN=BST1 PE=1 SV=2	15	318	35.7	7.8	0	144	1	4	4	5	1.96508e+06	4	0.00141764
	Master Protein Accessions	Master Protein Descriptions	Sequence	# PSMs	# Missed Cleavages	Theo. MH+ [Da]	m/z [Da] (by Search Engine): Mascot	DeltaM [ppm] (by Search Engine): Mascot	Ions Score (by Search Engine): Mascot	Top Apex RT [min]	Modifications	Qvality q-value	# Proteins		# Protein Groups	Abundance: F1764: n/a, Sample, n/a, n/a	Abundances Count: F1764: n/a, Sample, n/a, n/a	Sequence in Protein	Positions in Proteins	Quan Usage	Quan Ratio Usage
	Q10588	ADP-ribosyl cyclase/cyclic ADP-ribose hydrolase 2 OS=Homo sapiens OX=9606 GN=BST1 PE=1 SV=2	VADFLSWCR	2	0	1153.55	577.277	0.03	44	44.26	1xCarbamidomethyl [C8]	0.00165393	1		1	1.05866e+06	1	R.VADFLSWCR.Q	[137-145]	Used	Used
	Q10588	ADP-ribosyl cyclase/cyclic ADP-ribose hydrolase 2 OS=Homo sapiens OX=9606 GN=BST1 PE=1 SV=2	GFFADYEIPNLQK	1	0	1541.76	771.385	-0.13	32	47.82		0.00165393	1		1	135601	1	K.GFFADYEIPNLQK.E	[204-216]	Used	Used
	Q10588	ADP-ribosyl cyclase/cyclic ADP-ribose hydrolase 2 OS=Homo sapiens OX=9606 GN=BST1 PE=1 SV=2	DMGFQYSCINDYRPVK	1	0	1992.89	996.95	-0.53	70	37.51	1xCarbamidomethyl [C8]	0.00165393	1		1	201503	1	K.DMGFQYSCINDYRPVK.L	[252-267]	Used	Used
	Q10588	ADP-ribosyl cyclase/cyclic ADP-ribose hydrolase 2 OS=Homo sapiens OX=9606 GN=BST1 PE=1 SV=2	FMPLSDVLYGR	1	0	1297.66	649.334	-0.18	27	49.75		0.0024483	1		1	569316	1	R.FMPLSDVLYGR.V	[126-136]	Used	Used
P09211	Glutathione S-transferase P OS=Homo sapiens OX=9606 GN=GSTP1 PE=1 SV=2	35	210	23.3	5.64	0	183	1	4	4	8	1.92624e+06	4	0.00226822
	Master Protein Accessions	Master Protein Descriptions	Sequence	# PSMs	# Missed Cleavages	Theo. MH+ [Da]	m/z [Da] (by Search Engine): Mascot	DeltaM [ppm] (by Search Engine): Mascot	Ions Score (by Search Engine): Mascot	Top Apex RT [min]	Modifications	Qvality q-value	# Proteins		# Protein Groups	Abundance: F1764: n/a, Sample, n/a, n/a	Abundances Count: F1764: n/a, Sample, n/a, n/a	Sequence in Protein	Positions in Proteins	Quan Usage	Quan Ratio Usage
	P09211	Glutathione S-transferase P OS=Homo sapiens OX=9606 GN=GSTP1 PE=1 SV=2	PPYTVVYFPVR	2	0	1337.73	669.365	-1.35	41	44.41		0.00165393	1		1	388709	1	M.PPYTVVYFPVR.G	[2-12]	Used	Used
	P09211	Glutathione S-transferase P OS=Homo sapiens OX=9606 GN=GSTP1 PE=1 SV=2	MLLADQGQSWKEEVVTVETWQEGSLK	2	1	2991.48	997.83	-0.54	35	53.32		0.00165393	1		1	262459	1	R.MLLADQGQSWKEEVVTVETWQEGSLK.A	[20-45]	Used	Used
	P09211	Glutathione S-transferase P OS=Homo sapiens OX=9606 GN=GSTP1 PE=1 SV=2	FQDGDLTLYQSNTILR	1	0	1883.95	942.478	-0.26	81	43.78		0.00165393	1		1	902302	1	K.FQDGDLTLYQSNTILR.H	[56-71]	Used	Used
	P09211	Glutathione S-transferase P OS=Homo sapiens OX=9606 GN=GSTP1 PE=1 SV=2	ALPGQLKPFETLLSQNQGGK	2	0	2126.16	709.392	0.11	25	47.39		0.00165393	1		1	372769	1	K.ALPGQLKPFETLLSQNQGGK.T	[122-141]	Used	Used
	P09211	Glutathione S-transferase P OS=Homo sapiens OX=9606 GN=GSTP1 PE=1 SV=2	MLLADQGQSWKEEVVTVETWQEGSLK	1	1	3007.47	1003.16	0.27	8		1xOxidation [M1]	0.0024483	1		1			R.MLLADQGQSWKEEVVTVETWQEGSLK.A	[20-45]	Not Used	Not Used
P02775	Platelet basic protein OS=Homo sapiens OX=9606 GN=PPBP PE=1 SV=3	27	128	13.9	8.79	0	188	1	3	3	6	1.90912e+06	3	0.00170116
	Master Protein Accessions	Master Protein Descriptions	Sequence	# PSMs	# Missed Cleavages	Theo. MH+ [Da]	m/z [Da] (by Search Engine): Mascot	DeltaM [ppm] (by Search Engine): Mascot	Ions Score (by Search Engine): Mascot	Top Apex RT [min]	Modifications	Qvality q-value	# Proteins		# Protein Groups	Abundance: F1764: n/a, Sample, n/a, n/a	Abundances Count: F1764: n/a, Sample, n/a, n/a	Sequence in Protein	Positions in Proteins	Quan Usage	Quan Ratio Usage
	P02775	Platelet basic protein OS=Homo sapiens OX=9606 GN=PPBP PE=1 SV=3	GKEESLDSDLYAELR	2	1	1724.83	862.921	0.79	90	38.76		0.00165393	1		1	343770	1	K.GKEESLDSDLYAELR.C	[48-62]	Used	Used
	P02775	Platelet basic protein OS=Homo sapiens OX=9606 GN=PPBP PE=1 SV=3	KICLDPDAPR	2	1	1184.61	592.808	0.16	32	23.55	1xCarbamidomethyl [C3]	0.00165393	1		1	822386	1	R.KICLDPDAPR.I	[103-112]	Used	Used
	P02775	Platelet basic protein OS=Homo sapiens OX=9606 GN=PPBP PE=1 SV=3	NIQSLEVIGK	2	0	1100.63	550.819	0.33	27	32.91		0.00411958	1		1	742961	1	K.NIQSLEVIGK.G	[76-85]	Used	Used
P35613	Basigin OS=Homo sapiens OX=9606 GN=BSG PE=1 SV=2	12	385	42.2	5.66	0	75	1	3	3	5	1.87318e+06	3	0.00141764
	Master Protein Accessions	Master Protein Descriptions	Sequence	# PSMs	# Missed Cleavages	Theo. MH+ [Da]	m/z [Da] (by Search Engine): Mascot	DeltaM [ppm] (by Search Engine): Mascot	Ions Score (by Search Engine): Mascot	Top Apex RT [min]	Modifications	Qvality q-value	# Proteins		# Protein Groups	Abundance: F1764: n/a, Sample, n/a, n/a	Abundances Count: F1764: n/a, Sample, n/a, n/a	Sequence in Protein	Positions in Proteins	Quan Usage	Quan Ratio Usage
	P35613	Basigin OS=Homo sapiens OX=9606 GN=BSG PE=1 SV=2	GGVVLKEDALPGQK	2	1	1410.8	705.901	-0.46	53	25.86		0.00165393	1		1	535466	1	K.GGVVLKEDALPGQK.T	[174-187]	Used	Used
	P35613	Basigin OS=Homo sapiens OX=9606 GN=BSG PE=1 SV=2	SSEHINEGETAMLVCK	1	0	1804.82	602.278	-0.43	1	26.84	1xCarbamidomethyl [C15]	0.00339245	1		1	463064	1	K.SSEHINEGETAMLVCK.S	[228-243]	Used	Used
	P35613	Basigin OS=Homo sapiens OX=9606 GN=BSG PE=1 SV=2	SELHIENLNMEADPGQYR	2	0	2115.98	705.997	0.05	7	36.34		0.00456775	1		1	874650	1	R.SELHIENLNMEADPGQYR.C	[283-300]	Used	Used
P10599	Thioredoxin OS=Homo sapiens OX=9606 GN=TXN PE=1 SV=3	46	105	11.7	4.92	0	115	1	3	3	6	1.8557e+06	3	0.00170116
	Master Protein Accessions	Master Protein Descriptions	Sequence	# PSMs	# Missed Cleavages	Theo. MH+ [Da]	m/z [Da] (by Search Engine): Mascot	DeltaM [ppm] (by Search Engine): Mascot	Ions Score (by Search Engine): Mascot	Top Apex RT [min]	Modifications	Qvality q-value	# Proteins		# Protein Groups	Abundance: F1764: n/a, Sample, n/a, n/a	Abundances Count: F1764: n/a, Sample, n/a, n/a	Sequence in Protein	Positions in Proteins	Quan Usage	Quan Ratio Usage
	P10599	Thioredoxin OS=Homo sapiens OX=9606 GN=TXN PE=1 SV=3	TAFQEALDAAGDKLVVVDFSATWCGPCK	2	1	3056.45	1019.49	0.41	27	57.53	2xCarbamidomethyl [C24; C27]	0.00165393	1		1	405439	1	K.TAFQEALDAAGDKLVVVDFSATWCGPCK.M	[9-36]	Used	Used
	P10599	Thioredoxin OS=Homo sapiens OX=9606 GN=TXN PE=1 SV=3	EKLEATINELV	2	1	1258.69	629.848	0.15	40	43.11		0.00165393	1		1	484458	1	K.EKLEATINELV.-	[95-105]	Used	Used
	P10599	Thioredoxin OS=Homo sapiens OX=9606 GN=TXN PE=1 SV=3	VGEFSGANKEKLEATINELV	2	2	2148.12	1074.56	-0.39	44	48.86		0.0024483	1		1	965802	1	K.VGEFSGANKEKLEATINELV.-	[86-105]	Used	Used
P08514	Integrin alpha-IIb OS=Homo sapiens OX=9606 GN=ITGA2B PE=1 SV=3	7	1039	113.3	5.38	0	110	1	5	5	8	1.76105e+06	4	0.00226822
	Master Protein Accessions	Master Protein Descriptions	Sequence	# PSMs	# Missed Cleavages	Theo. MH+ [Da]	m/z [Da] (by Search Engine): Mascot	DeltaM [ppm] (by Search Engine): Mascot	Ions Score (by Search Engine): Mascot	Top Apex RT [min]	Modifications	Qvality q-value	# Proteins		# Protein Groups	Abundance: F1764: n/a, Sample, n/a, n/a	Abundances Count: F1764: n/a, Sample, n/a, n/a	Sequence in Protein	Positions in Proteins	Quan Usage	Quan Ratio Usage
	P08514	Integrin alpha-IIb OS=Homo sapiens OX=9606 GN=ITGA2B PE=1 SV=3	VVLCELGNPMKK	2	1	1387.74	694.375	-0.07	43	30.93	1xCarbamidomethyl [C4]	0.00165393	1		1	785352	1	R.VVLCELGNPMKK.N	[715-726]	Used	Used
	P08514	Integrin alpha-IIb OS=Homo sapiens OX=9606 GN=ITGA2B PE=1 SV=3	VAIVVGAPR	1	0	881.557	441.282	-0.04	22	25.52		0.00165393	1		1	287462	1	R.VAIVVGAPR.T	[64-72]	Used	Used
	P08514	Integrin alpha-IIb OS=Homo sapiens OX=9606 GN=ITGA2B PE=1 SV=3	GPHALGAPSLLLTGTQLYGR	2	0	2022.11	674.71	0.67	60			0.00165393	1		1			R.GPHALGAPSLLLTGTQLYGR.F	[367-386]	Not Used	Not Used
	P08514	Integrin alpha-IIb OS=Homo sapiens OX=9606 GN=ITGA2B PE=1 SV=3	AEGGQCPSLLFDLRDETR	2	1	2063.98	688.666	1.4	10	42.74	1xCarbamidomethyl [C6]	0.0024483	1		1	461500	1	R.AEGGQCPSLLFDLRDETR.N	[91-108]	Used	Used
	P08514	Integrin alpha-IIb OS=Homo sapiens OX=9606 GN=ITGA2B PE=1 SV=3	IVLLDVPVR	1	0	1023.66	512.332	-0.21	23	43.03		0.00411958	1		1	226733	1	K.IVLLDVPVR.A	[766-774]	Used	Used
P11413	Glucose-6-phosphate 1-dehydrogenase OS=Homo sapiens OX=9606 GN=G6PD PE=1 SV=4	15	515	59.2	6.84	0	167	1	4	4	7	1.74112e+06	4	0.00198469
	Master Protein Accessions	Master Protein Descriptions	Sequence	# PSMs	# Missed Cleavages	Theo. MH+ [Da]	m/z [Da] (by Search Engine): Mascot	DeltaM [ppm] (by Search Engine): Mascot	Ions Score (by Search Engine): Mascot	Top Apex RT [min]	Modifications	Qvality q-value	# Proteins		# Protein Groups	Abundance: F1764: n/a, Sample, n/a, n/a	Abundances Count: F1764: n/a, Sample, n/a, n/a	Sequence in Protein	Positions in Proteins	Quan Usage	Quan Ratio Usage
	P11413	Glucose-6-phosphate 1-dehydrogenase OS=Homo sapiens OX=9606 GN=G6PD PE=1 SV=4	EELFQGDAFHQSDTHIFIIMGASGDLAK	2	0	3093.46	1031.83	-0.16	37	46.98	1xOxidation [M20]	0.00165393	1		1	268515	1	R.EELFQGDAFHQSDTHIFIIMGASGDLAK.K	[18-45]	Used	Used
	P11413	Glucose-6-phosphate 1-dehydrogenase OS=Homo sapiens OX=9606 GN=G6PD PE=1 SV=4	GPTEADELMKR	2	1	1246.61	623.809	0.18	52	22.84		0.00165393	1		1	922212	1	R.GPTEADELMKR.V	[488-498]	Used	Used
	P11413	Glucose-6-phosphate 1-dehydrogenase OS=Homo sapiens OX=9606 GN=G6PD PE=1 SV=4	GSTTATFAAVVLYVENER	2	0	1927.98	964.491	-0.48	92	56.77		0.00165393	1		1	415356	1	R.GSTTATFAAVVLYVENER.W	[331-348]	Used	Used
	P11413	Glucose-6-phosphate 1-dehydrogenase OS=Homo sapiens OX=9606 GN=G6PD PE=1 SV=4	KPGMFFNPEESELDLTYGNR	1	0	2344.09	782.035	-0.74	10	45.7		0.00411958	1		1	135037	1	K.KPGMFFNPEESELDLTYGNR.Y	[408-427]	Used	Used
Q9H4G4	Golgi-associated plant pathogenesis-related protein 1 OS=Homo sapiens OX=9606 GN=GLIPR2 PE=1 SV=3	23	154	17.2	9.41	0	96	1	2	2	4	1.72208e+06	2	0.00113411
	Master Protein Accessions	Master Protein Descriptions	Sequence	# PSMs	# Missed Cleavages	Theo. MH+ [Da]	m/z [Da] (by Search Engine): Mascot	DeltaM [ppm] (by Search Engine): Mascot	Ions Score (by Search Engine): Mascot	Top Apex RT [min]	Modifications	Qvality q-value	# Proteins		# Protein Groups	Abundance: F1764: n/a, Sample, n/a, n/a	Abundances Count: F1764: n/a, Sample, n/a, n/a	Sequence in Protein	Positions in Proteins	Quan Usage	Quan Ratio Usage
	Q9H4G4	Golgi-associated plant pathogenesis-related protein 1 OS=Homo sapiens OX=9606 GN=GLIPR2 PE=1 SV=3	EAQQYSEALASTR	2	0	1453.69	727.35	0.56	75	23.38		0.00165393	1		1	549023	1	R.EAQQYSEALASTR.I	[38-50]	Used	Used
	Q9H4G4	Golgi-associated plant pathogenesis-related protein 1 OS=Homo sapiens OX=9606 GN=GLIPR2 PE=1 SV=3	YFPAGNVVNEGFFEENVLPPKK	2	1	2495.26	832.425	0.41	10	48.83		0.00535372	1		1	1.17305e+06	1	R.YFPAGNVVNEGFFEENVLPPKK.-	[133-154]	Used	Used
P62873	Guanine nucleotide-binding protein G(I)/G(S)/G(T) subunit beta-1 OS=Homo sapiens OX=9606 GN=GNB1 PE=1 SV=3	11	340	37.4	6	0	158	1	2	4	7	1.69778e+06	1	0.00198469
	Master Protein Accessions	Master Protein Descriptions	Sequence	# PSMs	# Missed Cleavages	Theo. MH+ [Da]	m/z [Da] (by Search Engine): Mascot	DeltaM [ppm] (by Search Engine): Mascot	Ions Score (by Search Engine): Mascot	Top Apex RT [min]	Modifications	Qvality q-value	# Proteins		# Protein Groups	Abundance: F1764: n/a, Sample, n/a, n/a	Abundances Count: F1764: n/a, Sample, n/a, n/a	Sequence in Protein	Positions in Proteins	Quan Usage	Quan Ratio Usage
	P62873	Guanine nucleotide-binding protein G(I)/G(S)/G(T) subunit beta-1 OS=Homo sapiens OX=9606 GN=GNB1 PE=1 SV=3	SELDQLRQEAEQLK	2	1	1728.88	864.942	0.04	30		1xAcetyl [N-Term]	0.00165393	1		1			M.SELDQLRQEAEQLK.N	[2-15]	Not Used	Not Used
	P62873	Guanine nucleotide-binding protein G(I)/G(S)/G(T) subunit beta-1 OS=Homo sapiens OX=9606 GN=GNB1 PE=1 SV=3	SELDQLRQEAEQLKNQIR	2	2	2240.16	747.393	0.18	54	51.05	1xAcetyl [N-Term]	0.00165393	1		1	1.69778e+06	1	M.SELDQLRQEAEQLKNQIR.D	[2-19]	Used	Used
	P62873; P62879	Guanine nucleotide-binding protein G(I)/G(S)/G(T) subunit beta-1 OS=Homo sapiens OX=9606 GN=GNB1 PE=1 SV=3 Guanine nucleotide-binding protein G(I)/G(S)/G(T) subunit beta-2 OS=Homo sapiens OX=9606 GN=GNB2 PE=1 SV=3	IYAMHWGTDSR	1	0	1336.61	668.809	0.4	17	30.87		0.0024483	2		2	336931	1	K.IYAMHWGTDSR.L	[58-68]	Not Used	Not Used
	P62873; P62879	Guanine nucleotide-binding protein G(I)/G(S)/G(T) subunit beta-1 OS=Homo sapiens OX=9606 GN=GNB1 PE=1 SV=3 Guanine nucleotide-binding protein G(I)/G(S)/G(T) subunit beta-2 OS=Homo sapiens OX=9606 GN=GNB2 PE=1 SV=3	AGVLAGHDNR	2	0	1009.52	505.262	-0.06	37	16.27		0.0024483	3		2	6.24252e+06	1	R.AGVLAGHDNR.V	[305-314]	Not Used	Not Used
Q5TFQ8	Signal-regulatory protein beta-1 isoform 3 OS=Homo sapiens OX=9606 GN=SIRPB1 PE=1 SV=1	7	398	43.3	7.83	0	50	1	2	2	3	1.58309e+06	2	0.000850581
	Master Protein Accessions	Master Protein Descriptions	Sequence	# PSMs	# Missed Cleavages	Theo. MH+ [Da]	m/z [Da] (by Search Engine): Mascot	DeltaM [ppm] (by Search Engine): Mascot	Ions Score (by Search Engine): Mascot	Top Apex RT [min]	Modifications	Qvality q-value	# Proteins		# Protein Groups	Abundance: F1764: n/a, Sample, n/a, n/a	Abundances Count: F1764: n/a, Sample, n/a, n/a	Sequence in Protein	Positions in Proteins	Quan Usage	Quan Ratio Usage
	Q5TFQ8	Signal-regulatory protein beta-1 isoform 3 OS=Homo sapiens OX=9606 GN=SIRPB1 PE=1 SV=1	LTCQVEHDGQPAVSK	1	0	1668.8	834.904	0.35	31	17.85	1xCarbamidomethyl [C3]	0.00165393	2		1	276285	1	K.LTCQVEHDGQPAVSK.S	[328-342]	Used	Used
	Q5TFQ8	Signal-regulatory protein beta-1 isoform 3 OS=Homo sapiens OX=9606 GN=SIRPB1 PE=1 SV=1	AKPSAPVVSGPAAR	2	0	1307.74	654.375	-0.07	28	18.13		0.00411958	2		1	1.30681e+06	1	R.AKPSAPVVSGPAAR.A	[145-158]	Used	Used
P22748	Carbonic anhydrase 4 OS=Homo sapiens OX=9606 GN=CA4 PE=1 SV=2	9	312	35	7.83	0.003	72	1	2	2	4	1.46609e+06	2	0.00113411
	Master Protein Accessions	Master Protein Descriptions	Sequence	# PSMs	# Missed Cleavages	Theo. MH+ [Da]	m/z [Da] (by Search Engine): Mascot	DeltaM [ppm] (by Search Engine): Mascot	Ions Score (by Search Engine): Mascot	Top Apex RT [min]	Modifications	Qvality q-value	# Proteins		# Protein Groups	Abundance: F1764: n/a, Sample, n/a, n/a	Abundances Count: F1764: n/a, Sample, n/a, n/a	Sequence in Protein	Positions in Proteins	Quan Usage	Quan Ratio Usage
	P22748	Carbonic anhydrase 4 OS=Homo sapiens OX=9606 GN=CA4 PE=1 SV=2	ASISGGGLPAPYQAK	2	0	1416.75	708.877	-0.39	37	28.02		0.00165393	1		1	852081	1	K.ASISGGGLPAPYQAK.Q	[98-112]	Used	Used
	P22748	Carbonic anhydrase 4 OS=Homo sapiens OX=9606 GN=CA4 PE=1 SV=2	DRQSPINIVTTK	2	1	1371.76	686.383	-0.72	22	26.78		0.00456775	1		1	614009	1	K.DRQSPINIVTTK.A	[49-60]	Used	Used
Q9BY15	Adhesion G protein-coupled receptor E3 OS=Homo sapiens OX=9606 GN=ADGRE3 PE=2 SV=2	5	652	72.6	8.05	0	42	1	2	2	3	1.37918e+06	2	0.000850581
	Master Protein Accessions	Master Protein Descriptions	Sequence	# PSMs	# Missed Cleavages	Theo. MH+ [Da]	m/z [Da] (by Search Engine): Mascot	DeltaM [ppm] (by Search Engine): Mascot	Ions Score (by Search Engine): Mascot	Top Apex RT [min]	Modifications	Qvality q-value	# Proteins		# Protein Groups	Abundance: F1764: n/a, Sample, n/a, n/a	Abundances Count: F1764: n/a, Sample, n/a, n/a	Sequence in Protein	Positions in Proteins	Quan Usage	Quan Ratio Usage
	Q9BY15	Adhesion G protein-coupled receptor E3 OS=Homo sapiens OX=9606 GN=ADGRE3 PE=2 SV=2	VLETALKDPEQK	1	1	1370.75	685.88	-0.16	42	22.43		0.00165393	1		1	693421	1	K.VLETALKDPEQK.V	[172-183]	Used	Used
	Q9BY15	Adhesion G protein-coupled receptor E3 OS=Homo sapiens OX=9606 GN=ADGRE3 PE=2 SV=2	TEGRQEISSTATTILRDVESK	2	2	2321.19	774.403	0.01	19	44.43		0.00165393	1		1	685763	1	R.TEGRQEISSTATTILRDVESK.V	[151-171]	Used	Used
P19878	Neutrophil cytosol factor 2 OS=Homo sapiens OX=9606 GN=NCF2 PE=1 SV=2	7	526	59.7	6.16	0	74	1	2	2	3	1.35291e+06	2	0.000850581
	Master Protein Accessions	Master Protein Descriptions	Sequence	# PSMs	# Missed Cleavages	Theo. MH+ [Da]	m/z [Da] (by Search Engine): Mascot	DeltaM [ppm] (by Search Engine): Mascot	Ions Score (by Search Engine): Mascot	Top Apex RT [min]	Modifications	Qvality q-value	# Proteins		# Protein Groups	Abundance: F1764: n/a, Sample, n/a, n/a	Abundances Count: F1764: n/a, Sample, n/a, n/a	Sequence in Protein	Positions in Proteins	Quan Usage	Quan Ratio Usage
	P19878	Neutrophil cytosol factor 2 OS=Homo sapiens OX=9606 GN=NCF2 PE=1 SV=2	IHPQQQPQEESSPQSDIPAPPSSK	2	0	2612.26	871.424	-0.48	46	22.96		0.00165393	1		1	456177	1	R.IHPQQQPQEESSPQSDIPAPPSSK.A	[301-324]	Used	Used
	P19878	Neutrophil cytosol factor 2 OS=Homo sapiens OX=9606 GN=NCF2 PE=1 SV=2	APGRPQLSPGQK	1	0	1235.69	618.347	0.67	27	16.91		0.00456775	1		1	896737	1	K.APGRPQLSPGQK.Q	[325-336]	Used	Used
P06744	Glucose-6-phosphate isomerase OS=Homo sapiens OX=9606 GN=GPI PE=1 SV=4	7	558	63.1	8.32	0	61	1	3	3	4	1.31318e+06	2	0.00113411
	Master Protein Accessions	Master Protein Descriptions	Sequence	# PSMs	# Missed Cleavages	Theo. MH+ [Da]	m/z [Da] (by Search Engine): Mascot	DeltaM [ppm] (by Search Engine): Mascot	Ions Score (by Search Engine): Mascot	Top Apex RT [min]	Modifications	Qvality q-value	# Proteins		# Protein Groups	Abundance: F1764: n/a, Sample, n/a, n/a	Abundances Count: F1764: n/a, Sample, n/a, n/a	Sequence in Protein	Positions in Proteins	Quan Usage	Quan Ratio Usage
	P06744	Glucose-6-phosphate isomerase OS=Homo sapiens OX=9606 GN=GPI PE=1 SV=4	VWYVSNIDGTHIAK	1	0	1602.83	801.916	-1.12	52	35.54		0.00165393	1		1	200860	1	R.VWYVSNIDGTHIAK.T	[181-194]	Used	Used
	P06744	Glucose-6-phosphate isomerase OS=Homo sapiens OX=9606 GN=GPI PE=1 SV=4	AALTRDPQFQK	2	1	1316.7	658.851	-0.46	31	28.06	1xAcetyl [N-Term]	0.00165393	1		1	1.11232e+06	1	M.AALTRDPQFQK.L	[2-12]	Used	Used
	P06744	Glucose-6-phosphate isomerase OS=Homo sapiens OX=9606 GN=GPI PE=1 SV=4	VFEGNRPTNSIVFTK	1	0	1708.9	854.955	0.19	19			0.00456775	1		1			K.VFEGNRPTNSIVFTK.L	[467-481]	Not Used	Not Used
P46940	Ras GTPase-activating-like protein IQGAP1 OS=Homo sapiens OX=9606 GN=IQGAP1 PE=1 SV=1	2	1657	189.1	6.48	0	14	1	2	2	2	1.2333e+06	2	0.000567054
	Master Protein Accessions	Master Protein Descriptions	Sequence	# PSMs	# Missed Cleavages	Theo. MH+ [Da]	m/z [Da] (by Search Engine): Mascot	DeltaM [ppm] (by Search Engine): Mascot	Ions Score (by Search Engine): Mascot	Top Apex RT [min]	Modifications	Qvality q-value	# Proteins		# Protein Groups	Abundance: F1764: n/a, Sample, n/a, n/a	Abundances Count: F1764: n/a, Sample, n/a, n/a	Sequence in Protein	Positions in Proteins	Quan Usage	Quan Ratio Usage
	P46940	Ras GTPase-activating-like protein IQGAP1 OS=Homo sapiens OX=9606 GN=IQGAP1 PE=1 SV=1	SPDVGLYGVIPECGETYHSDLAEAK	1	0	2707.26	903.09	0.45	14	41.89	1xCarbamidomethyl [C13]	0.00165393	1		1	217549	1	R.SPDVGLYGVIPECGETYHSDLAEAK.K	[648-672]	Used	Used
	P46940	Ras GTPase-activating-like protein IQGAP1 OS=Homo sapiens OX=9606 GN=IQGAP1 PE=1 SV=1	MLQHAASNK	1	0	999.504	500.256	0.05	13	15.21		0.00456775	1		1	1.01575e+06	1	K.MLQHAASNK.M	[1231-1239]	Used	Used
P10321	HLA class I histocompatibility antigen, C alpha chain OS=Homo sapiens OX=9606 GN=HLA-C PE=1 SV=3	11	366	40.6	6.04	0	104	1	2	2	4	1.15437e+06	2	0.00113411
	Master Protein Accessions	Master Protein Descriptions	Sequence	# PSMs	# Missed Cleavages	Theo. MH+ [Da]	m/z [Da] (by Search Engine): Mascot	DeltaM [ppm] (by Search Engine): Mascot	Ions Score (by Search Engine): Mascot	Top Apex RT [min]	Modifications	Qvality q-value	# Proteins		# Protein Groups	Abundance: F1764: n/a, Sample, n/a, n/a	Abundances Count: F1764: n/a, Sample, n/a, n/a	Sequence in Protein	Positions in Proteins	Quan Usage	Quan Ratio Usage
	P10321	HLA class I histocompatibility antigen, C alpha chain OS=Homo sapiens OX=9606 GN=HLA-C PE=1 SV=3	APWVEQEGPEYWDRETQK	2	1	2248.03	750.014	-1	14	37.17		0.00165393	1		1	487165	1	R.APWVEQEGPEYWDRETQK.Y	[73-90]	Used	Used
	P10321	HLA class I histocompatibility antigen, C alpha chain OS=Homo sapiens OX=9606 GN=HLA-C PE=1 SV=3	DGEDQTQDTELVETRPAGDGTFQK	2	0	2637.19	879.736	0.91	65	27.34		0.00165393	3		1	667209	1	R.DGEDQTQDTELVETRPAGDGTFQK.W	[244-267]	Used	Used
P15531	Nucleoside diphosphate kinase A OS=Homo sapiens OX=9606 GN=NME1 PE=1 SV=1	19	152	17.1	6.19	0	70	1	2	2	3	1.14759e+06	2	0.000850581
	Master Protein Accessions	Master Protein Descriptions	Sequence	# PSMs	# Missed Cleavages	Theo. MH+ [Da]	m/z [Da] (by Search Engine): Mascot	DeltaM [ppm] (by Search Engine): Mascot	Ions Score (by Search Engine): Mascot	Top Apex RT [min]	Modifications	Qvality q-value	# Proteins		# Protein Groups	Abundance: F1764: n/a, Sample, n/a, n/a	Abundances Count: F1764: n/a, Sample, n/a, n/a	Sequence in Protein	Positions in Proteins	Quan Usage	Quan Ratio Usage
	P15531	Nucleoside diphosphate kinase A OS=Homo sapiens OX=9606 GN=NME1 PE=1 SV=1	VMLGETNPADSKPGTIR	1	0	1785.92	893.461	-0.59	54	25.5		0.00165393	3		1	202677	1	R.VMLGETNPADSKPGTIR.G	[89-105]	Used	Used
	P15531	Nucleoside diphosphate kinase A OS=Homo sapiens OX=9606 GN=NME1 PE=1 SV=1	TFIAIKPDGVQR	2	0	1344.76	672.885	-0.56	34	28.67		0.0024483	2		1	944911	1	R.TFIAIKPDGVQR.G	[7-18]	Used	Used
O75347	Tubulin-specific chaperone A OS=Homo sapiens OX=9606 GN=TBCA PE=1 SV=3	27	108	12.8	5.29	0	87	1	2	2	4	1.08139e+06	2	0.00113411
	Master Protein Accessions	Master Protein Descriptions	Sequence	# PSMs	# Missed Cleavages	Theo. MH+ [Da]	m/z [Da] (by Search Engine): Mascot	DeltaM [ppm] (by Search Engine): Mascot	Ions Score (by Search Engine): Mascot	Top Apex RT [min]	Modifications	Qvality q-value	# Proteins		# Protein Groups	Abundance: F1764: n/a, Sample, n/a, n/a	Abundances Count: F1764: n/a, Sample, n/a, n/a	Sequence in Protein	Positions in Proteins	Quan Usage	Quan Ratio Usage
	O75347	Tubulin-specific chaperone A OS=Homo sapiens OX=9606 GN=TBCA PE=1 SV=3	ILENEKDLEEAEEYKEAR	2	2	2208.07	736.694	0.47	50	27.33		0.00165393	1		1	680765	1	R.ILENEKDLEEAEEYKEAR.L	[81-98]	Used	Used
	O75347	Tubulin-specific chaperone A OS=Homo sapiens OX=9606 GN=TBCA PE=1 SV=3	RLEAAYLDLQR	2	1	1347.74	674.373	0.66	22	32.5		0.00411958	1		1	400628	1	R.RLEAAYLDLQR.I	[70-80]	Used	Used
P09960	Leukotriene A-4 hydrolase OS=Homo sapiens OX=9606 GN=LTA4H PE=1 SV=2	6	611	69.2	6.18	0	96	1	3	3	6	1.04242e+06	2	0.00170116
	Master Protein Accessions	Master Protein Descriptions	Sequence	# PSMs	# Missed Cleavages	Theo. MH+ [Da]	m/z [Da] (by Search Engine): Mascot	DeltaM [ppm] (by Search Engine): Mascot	Ions Score (by Search Engine): Mascot	Top Apex RT [min]	Modifications	Qvality q-value	# Proteins		# Protein Groups	Abundance: F1764: n/a, Sample, n/a, n/a	Abundances Count: F1764: n/a, Sample, n/a, n/a	Sequence in Protein	Positions in Proteins	Quan Usage	Quan Ratio Usage
	P09960	Leukotriene A-4 hydrolase OS=Homo sapiens OX=9606 GN=LTA4H PE=1 SV=2	SLVLDTKDLTIEK	2	1	1474.84	737.923	1.1	59			0.00165393	1		1			R.SLVLDTKDLTIEK.V	[52-64]	Not Used	Not Used
	P09960	Leukotriene A-4 hydrolase OS=Homo sapiens OX=9606 GN=LTA4H PE=1 SV=2	TLVWSEKEQVEK	2	1	1475.77	738.391	0.18	46	26.1		0.0024483	1		1	573851	1	R.TLVWSEKEQVEK.S	[219-230]	Used	Used
	P09960	Leukotriene A-4 hydrolase OS=Homo sapiens OX=9606 GN=LTA4H PE=1 SV=2	TFGETHPFTK	2	0	1164.57	582.788	0.66	13	22.99		0.00411958	1		1	468570	1	K.TFGETHPFTK.L	[356-365]	Used	Used
P05089	Arginase-1 OS=Homo sapiens OX=9606 GN=ARG1 PE=1 SV=2	13	322	34.7	7.21	0.003	56	1	2	2	4	1.0296e+06	1	0.00113411
	Master Protein Accessions	Master Protein Descriptions	Sequence	# PSMs	# Missed Cleavages	Theo. MH+ [Da]	m/z [Da] (by Search Engine): Mascot	DeltaM [ppm] (by Search Engine): Mascot	Ions Score (by Search Engine): Mascot	Top Apex RT [min]	Modifications	Qvality q-value	# Proteins		# Protein Groups	Abundance: F1764: n/a, Sample, n/a, n/a	Abundances Count: F1764: n/a, Sample, n/a, n/a	Sequence in Protein	Positions in Proteins	Quan Usage	Quan Ratio Usage
	P05089	Arginase-1 OS=Homo sapiens OX=9606 GN=ARG1 PE=1 SV=2	LKEQECDVKDYGDLPFADIPNDSPFQIVK	2	2	3380.64	1127.55	-1.87	17		1xCarbamidomethyl [C6]	0.00165393	1		1			K.LKEQECDVKDYGDLPFADIPNDSPFQIVK.N	[40-68]	Not Used	Not Used
	P05089	Arginase-1 OS=Homo sapiens OX=9606 GN=ARG1 PE=1 SV=2	GGVEEGPTVLRK	2	1	1241.68	621.346	0.39	29	20.67		0.0024483	1		1	1.0296e+06	1	R.GGVEEGPTVLRK.A	[22-33]	Used	Used
P07195	L-lactate dehydrogenase B chain OS=Homo sapiens OX=9606 GN=LDHB PE=1 SV=2	11	334	36.6	6.05	0	106	1	3	4	7	978073	2	0.00198469
	Master Protein Accessions	Master Protein Descriptions	Sequence	# PSMs	# Missed Cleavages	Theo. MH+ [Da]	m/z [Da] (by Search Engine): Mascot	DeltaM [ppm] (by Search Engine): Mascot	Ions Score (by Search Engine): Mascot	Top Apex RT [min]	Modifications	Qvality q-value	# Proteins		# Protein Groups	Abundance: F1764: n/a, Sample, n/a, n/a	Abundances Count: F1764: n/a, Sample, n/a, n/a	Sequence in Protein	Positions in Proteins	Quan Usage	Quan Ratio Usage
	P07195	L-lactate dehydrogenase B chain OS=Homo sapiens OX=9606 GN=LDHB PE=1 SV=2	SADTLWDIQKDLKDL	3	2	1760.91	880.957	-0.37	58			0.00165393	1		1			K.SADTLWDIQKDLKDL.-	[320-334]	Not Used	Not Used
	P07195	L-lactate dehydrogenase B chain OS=Homo sapiens OX=9606 GN=LDHB PE=1 SV=2	LKDDEVAQLK	1	1	1158.64	579.822	-0.56	14	21.01		0.00165393	1		1	407250	1	K.LKDDEVAQLK.K	[309-318]	Used	Used
	P07195	L-lactate dehydrogenase B chain OS=Homo sapiens OX=9606 GN=LDHB PE=1 SV=2	SADTLWDIQK	2	0	1176.59	588.799	0.59	42	36.41		0.0024483	1		1	570823	1	K.SADTLWDIQK.D	[320-329]	Used	Used
	P07195; P00338	L-lactate dehydrogenase B chain OS=Homo sapiens OX=9606 GN=LDHB PE=1 SV=2 L-lactate dehydrogenase A chain OS=Homo sapiens OX=9606 GN=LDHA PE=1 SV=2	VIGSGCNLDSAR	1	0	1248.6	624.804	0.49	16		1xCarbamidomethyl [C6]	0.00411958	4		2			R.VIGSGCNLDSAR.F	[159-170]	Not Used	Not Used
P62879	Guanine nucleotide-binding protein G(I)/G(S)/G(T) subunit beta-2 OS=Homo sapiens OX=9606 GN=GNB2 PE=1 SV=3	11	340	37.3	6	0	87	1	2	4	7	961754	1	0.00198469
	Master Protein Accessions	Master Protein Descriptions	Sequence	# PSMs	# Missed Cleavages	Theo. MH+ [Da]	m/z [Da] (by Search Engine): Mascot	DeltaM [ppm] (by Search Engine): Mascot	Ions Score (by Search Engine): Mascot	Top Apex RT [min]	Modifications	Qvality q-value	# Proteins		# Protein Groups	Abundance: F1764: n/a, Sample, n/a, n/a	Abundances Count: F1764: n/a, Sample, n/a, n/a	Sequence in Protein	Positions in Proteins	Quan Usage	Quan Ratio Usage
	P62879	Guanine nucleotide-binding protein G(I)/G(S)/G(T) subunit beta-2 OS=Homo sapiens OX=9606 GN=GNB2 PE=1 SV=3	SELEQLRQEAEQLR	2	1	1770.9	885.953	0.07	38	48.33	1xAcetyl [N-Term]	0.00165393	2		1	961754	1	M.SELEQLRQEAEQLR.N	[2-15]	Used	Used
	P62879	Guanine nucleotide-binding protein G(I)/G(S)/G(T) subunit beta-2 OS=Homo sapiens OX=9606 GN=GNB2 PE=1 SV=3	SELEQLRQEAEQLRNQIR	2	2	2282.18	761.4	0.71	9		1xAcetyl [N-Term]	0.00165393	1		1			M.SELEQLRQEAEQLRNQIR.D	[2-19]	Not Used	Not Used
	P62873; P62879	Guanine nucleotide-binding protein G(I)/G(S)/G(T) subunit beta-1 OS=Homo sapiens OX=9606 GN=GNB1 PE=1 SV=3 Guanine nucleotide-binding protein G(I)/G(S)/G(T) subunit beta-2 OS=Homo sapiens OX=9606 GN=GNB2 PE=1 SV=3	IYAMHWGTDSR	1	0	1336.61	668.809	0.4	17	30.87		0.0024483	2		2	336931	1	K.IYAMHWGTDSR.L	[58-68]	Not Used	Not Used
	P62873; P62879	Guanine nucleotide-binding protein G(I)/G(S)/G(T) subunit beta-1 OS=Homo sapiens OX=9606 GN=GNB1 PE=1 SV=3 Guanine nucleotide-binding protein G(I)/G(S)/G(T) subunit beta-2 OS=Homo sapiens OX=9606 GN=GNB2 PE=1 SV=3	AGVLAGHDNR	2	0	1009.52	505.262	-0.06	37	16.27		0.0024483	3		2	6.24252e+06	1	R.AGVLAGHDNR.V	[305-314]	Not Used	Not Used
P32320	Cytidine deaminase OS=Homo sapiens OX=9606 GN=CDA PE=1 SV=2	40	146	16.2	6.92	0	148	1	3	3	4	952128	3	0.00113411
	Master Protein Accessions	Master Protein Descriptions	Sequence	# PSMs	# Missed Cleavages	Theo. MH+ [Da]	m/z [Da] (by Search Engine): Mascot	DeltaM [ppm] (by Search Engine): Mascot	Ions Score (by Search Engine): Mascot	Top Apex RT [min]	Modifications	Qvality q-value	# Proteins		# Protein Groups	Abundance: F1764: n/a, Sample, n/a, n/a	Abundances Count: F1764: n/a, Sample, n/a, n/a	Sequence in Protein	Positions in Proteins	Quan Usage	Quan Ratio Usage
	P32320	Cytidine deaminase OS=Homo sapiens OX=9606 GN=CDA PE=1 SV=2	SAYCPYSHFPVGAALLTQEGR	2	0	2324.11	775.376	0.56	39	44.79	1xCarbamidomethyl [C4]	0.00165393	1		1	472418	1	K.SAYCPYSHFPVGAALLTQEGR.I	[28-48]	Used	Used
	P32320	Cytidine deaminase OS=Homo sapiens OX=9606 GN=CDA PE=1 SV=2	GCNIENACYPLGICAER	1	0	1996.87	998.938	0.48	66	36.41	3xCarbamidomethyl [C2; C8; C14]	0.00165393	1		1	326169	1	K.GCNIENACYPLGICAER.T	[52-68]	Used	Used
	P32320	Cytidine deaminase OS=Homo sapiens OX=9606 GN=CDA PE=1 SV=2	AIAIASDMQDDFISPCGACR	1	0	2197.97	1099.48	-2.21	66	43.83	2xCarbamidomethyl [C16; C19]	0.00165393	1		1	153541	1	R.AIAIASDMQDDFISPCGACR.Q	[84-103]	Used	Used
Q00839	Heterogeneous nuclear ribonucleoprotein U OS=Homo sapiens OX=9606 GN=HNRNPU PE=1 SV=6	10	825	90.5	6	0	34	1	3	3	6	925184	2	0.00170116
	Master Protein Accessions	Master Protein Descriptions	Sequence	# PSMs	# Missed Cleavages	Theo. MH+ [Da]	m/z [Da] (by Search Engine): Mascot	DeltaM [ppm] (by Search Engine): Mascot	Ions Score (by Search Engine): Mascot	Top Apex RT [min]	Modifications	Qvality q-value	# Proteins		# Protein Groups	Abundance: F1764: n/a, Sample, n/a, n/a	Abundances Count: F1764: n/a, Sample, n/a, n/a	Sequence in Protein	Positions in Proteins	Quan Usage	Quan Ratio Usage
	Q00839	Heterogeneous nuclear ribonucleoprotein U OS=Homo sapiens OX=9606 GN=HNRNPU PE=1 SV=6	SPQPPVEEEDEHFDDTVVCLDTYNCDLHFK	3	0	3635.56	1212.52	-1.04	21	46.31	2xCarbamidomethyl [C19; C25]	0.00165393	1		1	187804	1	K.SPQPPVEEEDEHFDDTVVCLDTYNCDLHFK.I	[271-300]	Used	Used
	Q00839	Heterogeneous nuclear ribonucleoprotein U OS=Homo sapiens OX=9606 GN=HNRNPU PE=1 SV=6	EKPYFPIPEEYTFIQNVPLEDR	2	0	2724.36	908.789	-0.79	12			0.00165393	1		1			K.EKPYFPIPEEYTFIQNVPLEDR.V	[463-484]	Not Used	Not Used
	Q00839	Heterogeneous nuclear ribonucleoprotein U OS=Homo sapiens OX=9606 GN=HNRNPU PE=1 SV=6	GNFTLPEVAECFDEITYVELQKEEAQK	1	1	3187.51	1063.17	-2.59	27	59.36	1xCarbamidomethyl [C11]	0.00165393	1		1	737380	1	K.GNFTLPEVAECFDEITYVELQKEEAQK.L	[638-664]	Used	Used
P06748	Nucleophosmin OS=Homo sapiens OX=9606 GN=NPM1 PE=1 SV=2	14	294	32.6	4.78	0	68	1	2	2	2	873775	1	0.000567054
	Master Protein Accessions	Master Protein Descriptions	Sequence	# PSMs	# Missed Cleavages	Theo. MH+ [Da]	m/z [Da] (by Search Engine): Mascot	DeltaM [ppm] (by Search Engine): Mascot	Ions Score (by Search Engine): Mascot	Top Apex RT [min]	Modifications	Qvality q-value	# Proteins		# Protein Groups	Abundance: F1764: n/a, Sample, n/a, n/a	Abundances Count: F1764: n/a, Sample, n/a, n/a	Sequence in Protein	Positions in Proteins	Quan Usage	Quan Ratio Usage
	P06748	Nucleophosmin OS=Homo sapiens OX=9606 GN=NPM1 PE=1 SV=2	TVSLGAGAKDELHIVEAEAMNYEGSPIK	1	1	2929.46	977.158	-0.85	57			0.00165393	1		1			R.TVSLGAGAKDELHIVEAEAMNYEGSPIK.V	[46-73]	Not Used	Not Used
	P06748	Nucleophosmin OS=Homo sapiens OX=9606 GN=NPM1 PE=1 SV=2	SAPGGGSKVPQK	1	1	1112.61	556.806	-0.18	30	15.1		0.00456775	1		1	873775	1	R.SAPGGGSKVPQK.K	[143-154]	Used	Used
P30101	Protein disulfide-isomerase A3 OS=Homo sapiens OX=9606 GN=PDIA3 PE=1 SV=4	10	505	56.7	6.35	0	84	1	3	3	4	861067	3	0.00113411
	Master Protein Accessions	Master Protein Descriptions	Sequence	# PSMs	# Missed Cleavages	Theo. MH+ [Da]	m/z [Da] (by Search Engine): Mascot	DeltaM [ppm] (by Search Engine): Mascot	Ions Score (by Search Engine): Mascot	Top Apex RT [min]	Modifications	Qvality q-value	# Proteins		# Protein Groups	Abundance: F1764: n/a, Sample, n/a, n/a	Abundances Count: F1764: n/a, Sample, n/a, n/a	Sequence in Protein	Positions in Proteins	Quan Usage	Quan Ratio Usage
	P30101	Protein disulfide-isomerase A3 OS=Homo sapiens OX=9606 GN=PDIA3 PE=1 SV=4	FISDKDASIVGFFDDSFSEAHSEFLK	1	1	2938.38	980.13	-0.55	49	58.01		0.00165393	1		1	98058.9	1	K.FISDKDASIVGFFDDSFSEAHSEFLK.A	[148-173]	Used	Used
	P30101	Protein disulfide-isomerase A3 OS=Homo sapiens OX=9606 GN=PDIA3 PE=1 SV=4	EATNPPVIQEEKPK	2	0	1579.83	790.42	0.4	22	19.45		0.00165393	1		1	353497	1	R.EATNPPVIQEEKPK.K	[483-496]	Used	Used
	P30101	Protein disulfide-isomerase A3 OS=Homo sapiens OX=9606 GN=PDIA3 PE=1 SV=4	LSKDPNIVIAK	1	1	1197.72	599.364	0.44	25	22.76		0.00456775	1		1	409511	1	K.LSKDPNIVIAK.M	[423-433]	Used	Used
P06703	Protein S100-A6 OS=Homo sapiens OX=9606 GN=S100A6 PE=1 SV=1	32	90	10.2	5.48	0	154	1	3	3	6	835556	1	0.00170116
	Master Protein Accessions	Master Protein Descriptions	Sequence	# PSMs	# Missed Cleavages	Theo. MH+ [Da]	m/z [Da] (by Search Engine): Mascot	DeltaM [ppm] (by Search Engine): Mascot	Ions Score (by Search Engine): Mascot	Top Apex RT [min]	Modifications	Qvality q-value	# Proteins		# Protein Groups	Abundance: F1764: n/a, Sample, n/a, n/a	Abundances Count: F1764: n/a, Sample, n/a, n/a	Sequence in Protein	Positions in Proteins	Quan Usage	Quan Ratio Usage
	P06703	Protein S100-A6 OS=Homo sapiens OX=9606 GN=S100A6 PE=1 SV=1	ACPLDQAIGLLVAIFHK	2	0	1908.04	954.524	0.16	63		1xAcetyl [N-Term]; 1xCarbamidomethyl [C2]	0.00165393	1		1			M.ACPLDQAIGLLVAIFHK.Y	[2-18]	Not Used	Not Used
	P06703	Protein S100-A6 OS=Homo sapiens OX=9606 GN=S100A6 PE=1 SV=1	ACPLDQAIGLLVAIFHKYSGR	2	1	2371.26	1186.13	0.17	49		1xAcetyl [N-Term]; 1xCarbamidomethyl [C2]	0.00165393	1		1			M.ACPLDQAIGLLVAIFHKYSGR.E	[2-22]	Not Used	Not Used
	P06703	Protein S100-A6 OS=Homo sapiens OX=9606 GN=S100A6 PE=1 SV=1	LQDAEIAR	2	0	915.489	458.248	0.21	19	18.82		0.00456775	1		1	835556	1	K.LQDAEIAR.L	[48-55]	Used	Used
P15144	Aminopeptidase N OS=Homo sapiens OX=9606 GN=ANPEP PE=1 SV=4	8	967	109.5	5.48	0	42	1	4	4	5	793115	2	0.00141764
	Master Protein Accessions	Master Protein Descriptions	Sequence	# PSMs	# Missed Cleavages	Theo. MH+ [Da]	m/z [Da] (by Search Engine): Mascot	DeltaM [ppm] (by Search Engine): Mascot	Ions Score (by Search Engine): Mascot	Top Apex RT [min]	Modifications	Qvality q-value	# Proteins		# Protein Groups	Abundance: F1764: n/a, Sample, n/a, n/a	Abundances Count: F1764: n/a, Sample, n/a, n/a	Sequence in Protein	Positions in Proteins	Quan Usage	Quan Ratio Usage
	P15144	Aminopeptidase N OS=Homo sapiens OX=9606 GN=ANPEP PE=1 SV=4	QWMENPNNNPIHPNLR	1	0	1973.94	658.652	0.47	18	32.29		0.00165393	1		1	445904	1	K.QWMENPNNNPIHPNLR.S	[778-793]	Used	Used
	P15144	Aminopeptidase N OS=Homo sapiens OX=9606 GN=ANPEP PE=1 SV=4	GVGGSQPPDIDKTELVEPTEYLVVHLK	2	1	2920.53	730.887	-1.01	5			0.00165393	1		1			R.GVGGSQPPDIDKTELVEPTEYLVVHLK.G	[141-167]	Not Used	Not Used
	P15144	Aminopeptidase N OS=Homo sapiens OX=9606 GN=ANPEP PE=1 SV=4	DLTALSNMLPK	1	0	1202.64	601.826	0.21	38	48.83		0.0024483	1		1	347212	1	K.DLTALSNMLPK.G	[242-252]	Used	Used
	P15144	Aminopeptidase N OS=Homo sapiens OX=9606 GN=ANPEP PE=1 SV=4	FSTEYELQQLEQFKKDNEETGFGSGTR	1	2	3168.48	1056.83	-1.41	11			0.00411958	1		1			R.FSTEYELQQLEQFKKDNEETGFGSGTR.A	[909-935]	Not Used	Not Used
O15511	Actin-related protein 2/3 complex subunit 5 OS=Homo sapiens OX=9606 GN=ARPC5 PE=1 SV=3	36	151	16.3	5.67	0	139	1	2	2	5	792548	1	0.00141764
	Master Protein Accessions	Master Protein Descriptions	Sequence	# PSMs	# Missed Cleavages	Theo. MH+ [Da]	m/z [Da] (by Search Engine): Mascot	DeltaM [ppm] (by Search Engine): Mascot	Ions Score (by Search Engine): Mascot	Top Apex RT [min]	Modifications	Qvality q-value	# Proteins		# Protein Groups	Abundance: F1764: n/a, Sample, n/a, n/a	Abundances Count: F1764: n/a, Sample, n/a, n/a	Sequence in Protein	Positions in Proteins	Quan Usage	Quan Ratio Usage
	O15511	Actin-related protein 2/3 complex subunit 5 OS=Homo sapiens OX=9606 GN=ARPC5 PE=1 SV=3	GFESPSDNSSAMLLQWHEK	4	0	2162.98	1081.99	0.24	69	41.01		0.00165393	1		1	792548	2	K.GFESPSDNSSAMLLQWHEK.A	[113-131]	Used	Used
	O15511	Actin-related protein 2/3 complex subunit 5 OS=Homo sapiens OX=9606 GN=ARPC5 PE=1 SV=3	KVDVDEYDENKFVDEEDGGDGQAGPDEGEVDSCLR	1	2	3887.63	1296.55	1.81	48		1xCarbamidomethyl [C33]	0.00165393	1		1			R.KVDVDEYDENKFVDEEDGGDGQAGPDEGEVDSCLR.Q	[13-47]	Not Used	Not Used
Q15942	Zyxin OS=Homo sapiens OX=9606 GN=ZYX PE=1 SV=1	5	572	61.2	6.67	0.003	29	1	2	2	2	723922	2	0.000567054
	Master Protein Accessions	Master Protein Descriptions	Sequence	# PSMs	# Missed Cleavages	Theo. MH+ [Da]	m/z [Da] (by Search Engine): Mascot	DeltaM [ppm] (by Search Engine): Mascot	Ions Score (by Search Engine): Mascot	Top Apex RT [min]	Modifications	Qvality q-value	# Proteins		# Protein Groups	Abundance: F1764: n/a, Sample, n/a, n/a	Abundances Count: F1764: n/a, Sample, n/a, n/a	Sequence in Protein	Positions in Proteins	Quan Usage	Quan Ratio Usage
	Q15942	Zyxin OS=Homo sapiens OX=9606 GN=ZYX PE=1 SV=1	GPPASSPAPAPK	1	0	1076.57	538.79	-0.03	29	16.18		0.00456775	1		1	344553	1	R.GPPASSPAPAPK.F	[254-265]	Used	Used
	Q15942	Zyxin OS=Homo sapiens OX=9606 GN=ZYX PE=1 SV=1	FSPGAPGGSGSQPNQK	1	0	1515.72	758.363	-0.07	13	17.66		0.00456775	1		1	379370	1	K.FSPGAPGGSGSQPNQK.L	[280-295]	Used	Used
P37802	Transgelin-2 OS=Homo sapiens OX=9606 GN=TAGLN2 PE=1 SV=3	24	199	22.4	8.25	0	119	1	4	4	4	713942	2	0.00113411
	Master Protein Accessions	Master Protein Descriptions	Sequence	# PSMs	# Missed Cleavages	Theo. MH+ [Da]	m/z [Da] (by Search Engine): Mascot	DeltaM [ppm] (by Search Engine): Mascot	Ions Score (by Search Engine): Mascot	Top Apex RT [min]	Modifications	Qvality q-value	# Proteins		# Protein Groups	Abundance: F1764: n/a, Sample, n/a, n/a	Abundances Count: F1764: n/a, Sample, n/a, n/a	Sequence in Protein	Positions in Proteins	Quan Usage	Quan Ratio Usage
	P37802	Transgelin-2 OS=Homo sapiens OX=9606 GN=TAGLN2 PE=1 SV=3	QMEQISQFLQAAER	1	0	1678.82	839.914	-0.42	50			0.00165393	1		1			K.QMEQISQFLQAAER.Y	[89-102]	Not Used	Not Used
	P37802	Transgelin-2 OS=Homo sapiens OX=9606 GN=TAGLN2 PE=1 SV=3	YGINTTDIFQTVDLWEGK	1	0	2100.03	1050.52	-2.26	72			0.00165393	1		1			R.YGINTTDIFQTVDLWEGK.N	[103-120]	Not Used	Not Used
	P37802	Transgelin-2 OS=Homo sapiens OX=9606 GN=TAGLN2 PE=1 SV=3	DDGLFSGDPNWFPK	1	0	1594.72	797.862	-0.58	16	51.73		0.0024483	1		1	142962	1	R.DDGLFSGDPNWFPK.K	[140-153]	Used	Used
	P37802	Transgelin-2 OS=Homo sapiens OX=9606 GN=TAGLN2 PE=1 SV=3	DDGLFSGDPNWFPKK	1	1	1722.81	861.909	-1.05	33	45.51		0.00456775	1		1	570980	1	R.DDGLFSGDPNWFPKK.S	[140-154]	Used	Used
Q9NY65	Tubulin alpha-8 chain OS=Homo sapiens OX=9606 GN=TUBA8 PE=1 SV=1	15	449	50.1	5.06	0	82	1	4	4	5	690542	2	0.00141764
	Master Protein Accessions	Master Protein Descriptions	Sequence	# PSMs	# Missed Cleavages	Theo. MH+ [Da]	m/z [Da] (by Search Engine): Mascot	DeltaM [ppm] (by Search Engine): Mascot	Ions Score (by Search Engine): Mascot	Top Apex RT [min]	Modifications	Qvality q-value	# Proteins		# Protein Groups	Abundance: F1764: n/a, Sample, n/a, n/a	Abundances Count: F1764: n/a, Sample, n/a, n/a	Sequence in Protein	Positions in Proteins	Quan Usage	Quan Ratio Usage
	Q9NY65	Tubulin alpha-8 chain OS=Homo sapiens OX=9606 GN=TUBA8 PE=1 SV=1	LISQIVSSITASLR	1	0	1487.88	744.444	1.02	54			0.00165393	5		1			R.LISQIVSSITASLR.F	[230-243]	Not Used	Not Used
	Q9NY65	Tubulin alpha-8 chain OS=Homo sapiens OX=9606 GN=TUBA8 PE=1 SV=1	FDGALNVDLTEFQTNLVPYPR	1	0	2409.21	1205.11	1.37	12			0.00165393	7		1			R.FDGALNVDLTEFQTNLVPYPR.I	[244-264]	Not Used	Not Used
	Q9NY65	Tubulin alpha-8 chain OS=Homo sapiens OX=9606 GN=TUBA8 PE=1 SV=1	AFVHWYVGEGMEEGEFSEAR	1	0	2330.02	777.343	-1.59	10	45.44		0.00165393	6		1	320574	1	R.AFVHWYVGEGMEEGEFSEAR.E	[403-422]	Used	Used
	Q9NY65	Tubulin alpha-8 chain OS=Homo sapiens OX=9606 GN=TUBA8 PE=1 SV=1	NLDIERPTYTNLNR	2	0	1718.88	859.944	-0.2	23	30.12		0.00411958	7		1	369968	1	R.NLDIERPTYTNLNR.L	[216-229]	Used	Used
Q16851	UTP--glucose-1-phosphate uridylyltransferase OS=Homo sapiens OX=9606 GN=UGP2 PE=1 SV=5	15	508	56.9	8.15	0	127	1	5	5	8	636700	2	0.00226822
	Master Protein Accessions	Master Protein Descriptions	Sequence	# PSMs	# Missed Cleavages	Theo. MH+ [Da]	m/z [Da] (by Search Engine): Mascot	DeltaM [ppm] (by Search Engine): Mascot	Ions Score (by Search Engine): Mascot	Top Apex RT [min]	Modifications	Qvality q-value	# Proteins		# Protein Groups	Abundance: F1764: n/a, Sample, n/a, n/a	Abundances Count: F1764: n/a, Sample, n/a, n/a	Sequence in Protein	Positions in Proteins	Quan Usage	Quan Ratio Usage
	Q16851	UTP--glucose-1-phosphate uridylyltransferase OS=Homo sapiens OX=9606 GN=UGP2 PE=1 SV=5	NENTFLDLTVQQIEHLNK	2	0	2156.1	1078.55	-1.06	65			0.00165393	1		1			R.NENTFLDLTVQQIEHLNK.T	[134-151]	Not Used	Not Used
	Q16851	UTP--glucose-1-phosphate uridylyltransferase OS=Homo sapiens OX=9606 GN=UGP2 PE=1 SV=5	IQRPPEDSIQPYEK	2	0	1699.86	850.436	-0.56	43	23.19		0.00165393	1		1	258200	1	K.IQRPPEDSIQPYEK.I	[78-91]	Used	Used
	Q16851	UTP--glucose-1-phosphate uridylyltransferase OS=Homo sapiens OX=9606 GN=UGP2 PE=1 SV=5	TYNTDVPLVLMNSFNTDEDTKK	2	1	2545.21	849.076	0.22	15			0.00165393	1		1			K.TYNTDVPLVLMNSFNTDEDTKK.I	[152-173]	Not Used	Not Used
	Q16851	UTP--glucose-1-phosphate uridylyltransferase OS=Homo sapiens OX=9606 GN=UGP2 PE=1 SV=5	VKIYTFNQSR	1	1	1255.68	628.343	-0.98	8	25.86		0.00456775	1		1	378500	1	R.VKIYTFNQSR.Y	[183-192]	Used	Used
	Q16851	UTP--glucose-1-phosphate uridylyltransferase OS=Homo sapiens OX=9606 GN=UGP2 PE=1 SV=5	ADVKGGTLTQYEGK	1	1	1466.75	733.879	0.87	27			0.00608856	1		1			R.ADVKGGTLTQYEGK.L	[288-301]	Not Used	Not Used
Q6UX06	Olfactomedin-4 OS=Homo sapiens OX=9606 GN=OLFM4 PE=1 SV=1	6	510	57.2	5.69	0	120	1	2	2	4	624557	2	0.00113411
	Master Protein Accessions	Master Protein Descriptions	Sequence	# PSMs	# Missed Cleavages	Theo. MH+ [Da]	m/z [Da] (by Search Engine): Mascot	DeltaM [ppm] (by Search Engine): Mascot	Ions Score (by Search Engine): Mascot	Top Apex RT [min]	Modifications	Qvality q-value	# Proteins		# Protein Groups	Abundance: F1764: n/a, Sample, n/a, n/a	Abundances Count: F1764: n/a, Sample, n/a, n/a	Sequence in Protein	Positions in Proteins	Quan Usage	Quan Ratio Usage
	Q6UX06	Olfactomedin-4 OS=Homo sapiens OX=9606 GN=OLFM4 PE=1 SV=1	EYVQLISVYEKK	2	1	1498.82	749.911	0.31	44	36.25		0.00165393	1		1	241493	1	R.EYVQLISVYEKK.L	[122-133]	Used	Used
	Q6UX06	Olfactomedin-4 OS=Homo sapiens OX=9606 GN=OLFM4 PE=1 SV=1	GTCQCSVSLPDTTFPVDRVER	2	1	2424.13	808.713	-0.94	50	37.72	2xCarbamidomethyl [C3; C5]	0.00165393	1		1	383064	1	R.GTCQCSVSLPDTTFPVDRVER.L	[81-101]	Used	Used
P01889	HLA class I histocompatibility antigen, B alpha chain OS=Homo sapiens OX=9606 GN=HLA-B PE=1 SV=3	10	362	40.4	5.85	0	151	1	3	3	5	595553	2	0.00141764
	Master Protein Accessions	Master Protein Descriptions	Sequence	# PSMs	# Missed Cleavages	Theo. MH+ [Da]	m/z [Da] (by Search Engine): Mascot	DeltaM [ppm] (by Search Engine): Mascot	Ions Score (by Search Engine): Mascot	Top Apex RT [min]	Modifications	Qvality q-value	# Proteins		# Protein Groups	Abundance: F1764: n/a, Sample, n/a, n/a	Abundances Count: F1764: n/a, Sample, n/a, n/a	Sequence in Protein	Positions in Proteins	Quan Usage	Quan Ratio Usage
	P01889	HLA class I histocompatibility antigen, B alpha chain OS=Homo sapiens OX=9606 GN=HLA-B PE=1 SV=3	WAAVVVPSGEEQR	2	0	1427.73	714.367	-0.14	28	31.31		0.00165393	5		1	237928	1	K.WAAVVVPSGEEQR.Y	[268-280]	Used	Used
	P01889	HLA class I histocompatibility antigen, B alpha chain OS=Homo sapiens OX=9606 GN=HLA-B PE=1 SV=3	DGEDQTQDTELVETRPAGDR	1	0	2232	744.673	1.31	56	22.43		0.00165393	1		1	357625	1	R.DGEDQTQDTELVETRPAGDR.T	[244-263]	Used	Used
	P01889	HLA class I histocompatibility antigen, B alpha chain OS=Homo sapiens OX=9606 GN=HLA-B PE=1 SV=3	DGEDQTQDTELVETRPAGDRTFQK	2	1	2736.27	912.763	0.96	42			0.00165393	1		1			R.DGEDQTQDTELVETRPAGDRTFQK.W	[244-267]	Not Used	Not Used
O43451	Maltase-glucoamylase OS=Homo sapiens OX=9606 GN=MGAM PE=1 SV=6	2	2753	311.8	5.41	0	76	1	3	3	4	569121	2	0.00113411
	Master Protein Accessions	Master Protein Descriptions	Sequence	# PSMs	# Missed Cleavages	Theo. MH+ [Da]	m/z [Da] (by Search Engine): Mascot	DeltaM [ppm] (by Search Engine): Mascot	Ions Score (by Search Engine): Mascot	Top Apex RT [min]	Modifications	Qvality q-value	# Proteins		# Protein Groups	Abundance: F1764: n/a, Sample, n/a, n/a	Abundances Count: F1764: n/a, Sample, n/a, n/a	Sequence in Protein	Positions in Proteins	Quan Usage	Quan Ratio Usage
	O43451	Maltase-glucoamylase OS=Homo sapiens OX=9606 GN=MGAM PE=1 SV=6	DASLNHPPYMPYLESR	2	0	1889.89	945.446	-0.15	32	39.39		0.00165393	1		1	260302	1	R.DASLNHPPYMPYLESR.D	[2334-2349]	Used	Used
	O43451	Maltase-glucoamylase OS=Homo sapiens OX=9606 GN=MGAM PE=1 SV=6	EIEELYNNPQNPER	1	0	1744.81	872.91	-0.18	46			0.00165393	1		1			R.EIEELYNNPQNPER.S; R.EIEELYNNPQNPER.S	[1397-1410]; [2293-2306]	Not Used	Not Used
	O43451	Maltase-glucoamylase OS=Homo sapiens OX=9606 GN=MGAM PE=1 SV=6	DASLNHPPYMPHLESR	1	0	1863.88	621.965	-0.69	16	31.53		0.00456775	1		1	308819	1	R.DASLNHPPYMPHLESR.D	[1438-1453]	Used	Used
P35754	Glutaredoxin-1 OS=Homo sapiens OX=9606 GN=GLRX PE=1 SV=2	24	106	11.8	8.09	0	52	1	2	2	2	554039	2	0.000567054
	Master Protein Accessions	Master Protein Descriptions	Sequence	# PSMs	# Missed Cleavages	Theo. MH+ [Da]	m/z [Da] (by Search Engine): Mascot	DeltaM [ppm] (by Search Engine): Mascot	Ions Score (by Search Engine): Mascot	Top Apex RT [min]	Modifications	Qvality q-value	# Proteins		# Protein Groups	Abundance: F1764: n/a, Sample, n/a, n/a	Abundances Count: F1764: n/a, Sample, n/a, n/a	Sequence in Protein	Positions in Proteins	Quan Usage	Quan Ratio Usage
	P35754	Glutaredoxin-1 OS=Homo sapiens OX=9606 GN=GLRX PE=1 SV=2	RAQEILSQLPIK	1	1	1395.83	698.419	-0.79	32	37.17		0.00165393	1		1	402245	1	R.RAQEILSQLPIK.Q	[28-39]	Used	Used
	P35754	Glutaredoxin-1 OS=Homo sapiens OX=9606 GN=GLRX PE=1 SV=2	VVVFIKPTCPYCR	1	0	1638.85	819.929	0.98	39	32.7	2xCarbamidomethyl [C9; C12]	0.0024483	1		1	151795	1	K.VVVFIKPTCPYCR.R	[15-27]	Used	Used
P11021	Endoplasmic reticulum chaperone BiP OS=Homo sapiens OX=9606 GN=HSPA5 PE=1 SV=2	4	654	72.3	5.16	0	163	1	1	2	4	545474	1	0.00113411
	Master Protein Accessions	Master Protein Descriptions	Sequence	# PSMs	# Missed Cleavages	Theo. MH+ [Da]	m/z [Da] (by Search Engine): Mascot	DeltaM [ppm] (by Search Engine): Mascot	Ions Score (by Search Engine): Mascot	Top Apex RT [min]	Modifications	Qvality q-value	# Proteins		# Protein Groups	Abundance: F1764: n/a, Sample, n/a, n/a	Abundances Count: F1764: n/a, Sample, n/a, n/a	Sequence in Protein	Positions in Proteins	Quan Usage	Quan Ratio Usage
	P11021	Endoplasmic reticulum chaperone BiP OS=Homo sapiens OX=9606 GN=HSPA5 PE=1 SV=2	IEIESFYEGEDFSETLTR	2	0	2164.99	1083	-1.53	79	49.63		0.00165393	1		1	545474	1	R.IEIESFYEGEDFSETLTR.A	[307-324]	Used	Used
	P11142; P11021; P0DMV8	Heat shock cognate 71 kDa protein OS=Homo sapiens OX=9606 GN=HSPA8 PE=1 SV=1 Endoplasmic reticulum chaperone BiP OS=Homo sapiens OX=9606 GN=HSPA5 PE=1 SV=2 Heat shock 70 kDa protein 1A OS=Homo sapiens OX=9606 GN=HSPA1A PE=1 SV=1	VEIIANDQGNR	2	0	1228.63	614.813	-8.24	26	20.73		0.00165393	5		3	529306	1	R.VEIIANDQGNR.I	[50-60]	Not Used	Not Used
P02549	Spectrin alpha chain, erythrocytic 1 OS=Homo sapiens OX=9606 GN=SPTA1 PE=1 SV=5	1	2419	279.8	5.05	0.003	37	1	3	3	3	537731	3	0.000850581
	Master Protein Accessions	Master Protein Descriptions	Sequence	# PSMs	# Missed Cleavages	Theo. MH+ [Da]	m/z [Da] (by Search Engine): Mascot	DeltaM [ppm] (by Search Engine): Mascot	Ions Score (by Search Engine): Mascot	Top Apex RT [min]	Modifications	Qvality q-value	# Proteins		# Protein Groups	Abundance: F1764: n/a, Sample, n/a, n/a	Abundances Count: F1764: n/a, Sample, n/a, n/a	Sequence in Protein	Positions in Proteins	Quan Usage	Quan Ratio Usage
	P02549	Spectrin alpha chain, erythrocytic 1 OS=Homo sapiens OX=9606 GN=SPTA1 PE=1 SV=5	LAQFVEHWEK	1	0	1286.65	643.83	-0.43	17	32.08		0.00456775	1		1	288321	1	R.LAQFVEHWEK.L	[1794-1803]	Used	Used
	P02549	Spectrin alpha chain, erythrocytic 1 OS=Homo sapiens OX=9606 GN=SPTA1 PE=1 SV=5	DLQGVQNLLKK	1	1	1255.74	628.373	1.56	12	35.25		0.00456775	1		1	130615	1	R.DLQGVQNLLKK.H	[1744-1754]	Used	Used
	P02549	Spectrin alpha chain, erythrocytic 1 OS=Homo sapiens OX=9606 GN=SPTA1 PE=1 SV=5	SDDKSSLDSLEALMK	1	1	1638.79	819.898	-0.5	35	44.75		0.00456775	1		1	118794	1	R.SDDKSSLDSLEALMK.K	[1420-1434]	Used	Used
P50552	Vasodilator-stimulated phosphoprotein OS=Homo sapiens OX=9606 GN=VASP PE=1 SV=3	8	380	39.8	8.94	0	285	1	2	2	6	497106	2	0.00170116
	Master Protein Accessions	Master Protein Descriptions	Sequence	# PSMs	# Missed Cleavages	Theo. MH+ [Da]	m/z [Da] (by Search Engine): Mascot	DeltaM [ppm] (by Search Engine): Mascot	Ions Score (by Search Engine): Mascot	Top Apex RT [min]	Modifications	Qvality q-value	# Proteins		# Protein Groups	Abundance: F1764: n/a, Sample, n/a, n/a	Abundances Count: F1764: n/a, Sample, n/a, n/a	Sequence in Protein	Positions in Proteins	Quan Usage	Quan Ratio Usage
	P50552	Vasodilator-stimulated phosphoprotein OS=Homo sapiens OX=9606 GN=VASP PE=1 SV=3	VKEEIIEAFVQELR	4	1	1702.94	568.318	0.94	42	55.16		0.00165393	1		1	216468	1	K.VKEEIIEAFVQELR.K	[362-375]	Used	Used
	P50552	Vasodilator-stimulated phosphoprotein OS=Homo sapiens OX=9606 GN=VASP PE=1 SV=3	TPKDESANQEEPEAR	2	1	1700.77	850.89	0.54	76	15.48		0.00165393	1		1	280638	1	K.TPKDESANQEEPEAR.V	[284-298]	Used	Used
P40925	Malate dehydrogenase, cytoplasmic OS=Homo sapiens OX=9606 GN=MDH1 PE=1 SV=4	19	334	36.4	7.36	0	49	1	3	3	5	430939	2	0.00141764
	Master Protein Accessions	Master Protein Descriptions	Sequence	# PSMs	# Missed Cleavages	Theo. MH+ [Da]	m/z [Da] (by Search Engine): Mascot	DeltaM [ppm] (by Search Engine): Mascot	Ions Score (by Search Engine): Mascot	Top Apex RT [min]	Modifications	Qvality q-value	# Proteins		# Protein Groups	Abundance: F1764: n/a, Sample, n/a, n/a	Abundances Count: F1764: n/a, Sample, n/a, n/a	Sequence in Protein	Positions in Proteins	Quan Usage	Quan Ratio Usage
	P40925	Malate dehydrogenase, cytoplasmic OS=Homo sapiens OX=9606 GN=MDH1 PE=1 SV=4	SEPIRVLVTGAAGQIAYSLLYSIGNGSVFGK	1	1	3209.72	1070.58	1.42	24		1xAcetyl [N-Term]	0.00165393	1		1			M.SEPIRVLVTGAAGQIAYSLLYSIGNGSVFGK.D	[2-32]	Not Used	Not Used
	P40925	Malate dehydrogenase, cytoplasmic OS=Homo sapiens OX=9606 GN=MDH1 PE=1 SV=4	ELTEEKESAFEFLSSA	2	1	1816.85	908.928	0.28	31	48.92		0.00165393	1		1	208035	1	K.ELTEEKESAFEFLSSA.-	[319-334]	Used	Used
	P40925	Malate dehydrogenase, cytoplasmic OS=Homo sapiens OX=9606 GN=MDH1 PE=1 SV=4	SAPSIPKENFSCLTR	2	1	1706.85	853.933	3.71	18	32.4	1xCarbamidomethyl [C12]	0.00411958	1		1	222905	1	K.SAPSIPKENFSCLTR.L	[143-157]	Used	Used
O00299	Chloride intracellular channel protein 1 OS=Homo sapiens OX=9606 GN=CLIC1 PE=1 SV=4	19	241	26.9	5.17	0	65	1	2	2	3	419344	2	0.000850581
	Master Protein Accessions	Master Protein Descriptions	Sequence	# PSMs	# Missed Cleavages	Theo. MH+ [Da]	m/z [Da] (by Search Engine): Mascot	DeltaM [ppm] (by Search Engine): Mascot	Ions Score (by Search Engine): Mascot	Top Apex RT [min]	Modifications	Qvality q-value	# Proteins		# Protein Groups	Abundance: F1764: n/a, Sample, n/a, n/a	Abundances Count: F1764: n/a, Sample, n/a, n/a	Sequence in Protein	Positions in Proteins	Quan Usage	Quan Ratio Usage
	O00299	Chloride intracellular channel protein 1 OS=Homo sapiens OX=9606 GN=CLIC1 PE=1 SV=4	LAALNPESNTAGLDIFAK	2	0	1844.98	922.989	-2.47	42	47.93		0.00165393	1		1	286638	1	K.LAALNPESNTAGLDIFAK.F	[96-113]	Used	Used
	O00299	Chloride intracellular channel protein 1 OS=Homo sapiens OX=9606 GN=CLIC1 PE=1 SV=4	VLDNYLTSPLPEEVDETSAEDEGVSQRK	1	1	3120.49	1040.83	-0.74	5	41.65		0.00608856	1		1	132706	1	K.VLDNYLTSPLPEEVDETSAEDEGVSQRK.F	[139-166]	Used	Used
Q99439	Calponin-2 OS=Homo sapiens OX=9606 GN=CNN2 PE=1 SV=4	10	309	33.7	7.33	0	49	1	2	2	2	407135	2	0.000567054
	Master Protein Accessions	Master Protein Descriptions	Sequence	# PSMs	# Missed Cleavages	Theo. MH+ [Da]	m/z [Da] (by Search Engine): Mascot	DeltaM [ppm] (by Search Engine): Mascot	Ions Score (by Search Engine): Mascot	Top Apex RT [min]	Modifications	Qvality q-value	# Proteins		# Protein Groups	Abundance: F1764: n/a, Sample, n/a, n/a	Abundances Count: F1764: n/a, Sample, n/a, n/a	Sequence in Protein	Positions in Proteins	Quan Usage	Quan Ratio Usage
	Q99439	Calponin-2 OS=Homo sapiens OX=9606 GN=CNN2 PE=1 SV=4	GLKDGTILCTLMNK	1	1	1563.82	782.415	0.14	49	43.35	1xCarbamidomethyl [C9]	0.00165393	1		1	308378	1	K.GLKDGTILCTLMNK.L	[53-66]	Used	Used
	Q99439	Calponin-2 OS=Homo sapiens OX=9606 GN=CNN2 PE=1 SV=4	SMQNWHQLENLSNFIK	1	0	1988.96	663.66	0.05	12	49.81		0.0024483	1		1	98757	1	R.SMQNWHQLENLSNFIK.A	[78-93]	Used	Used
P07237	Protein disulfide-isomerase OS=Homo sapiens OX=9606 GN=P4HB PE=1 SV=3	12	508	57.1	4.87	0	55	1	4	4	5	393791	2	0.00141764
	Master Protein Accessions	Master Protein Descriptions	Sequence	# PSMs	# Missed Cleavages	Theo. MH+ [Da]	m/z [Da] (by Search Engine): Mascot	DeltaM [ppm] (by Search Engine): Mascot	Ions Score (by Search Engine): Mascot	Top Apex RT [min]	Modifications	Qvality q-value	# Proteins		# Protein Groups	Abundance: F1764: n/a, Sample, n/a, n/a	Abundances Count: F1764: n/a, Sample, n/a, n/a	Sequence in Protein	Positions in Proteins	Quan Usage	Quan Ratio Usage
	P07237	Protein disulfide-isomerase OS=Homo sapiens OX=9606 GN=P4HB PE=1 SV=3	TGPAATTLPDGAAAESLVESSEVAVIGFFK	1	0	2935.49	979.169	-0.07	39	64.26		0.00165393	1		1	109703	1	R.TGPAATTLPDGAAAESLVESSEVAVIGFFK.D	[133-162]	Used	Used
	P07237	Protein disulfide-isomerase OS=Homo sapiens OX=9606 GN=P4HB PE=1 SV=3	TGPAATTLPDGAAAESLVESSEVAVIGFFKDVESDSAK	1	1	3766.85	1256.29	1.71	10			0.00165393	1		1			R.TGPAATTLPDGAAAESLVESSEVAVIGFFKDVESDSAK.Q	[133-170]	Not Used	Not Used
	P07237	Protein disulfide-isomerase OS=Homo sapiens OX=9606 GN=P4HB PE=1 SV=3	EADDIVNWLK	2	0	1202.61	601.806	0.29	33			0.00165393	1		1			R.EADDIVNWLK.K	[121-130]	Not Used	Not Used
	P07237	Protein disulfide-isomerase OS=Homo sapiens OX=9606 GN=P4HB PE=1 SV=3	YKPESEELTAER	1	0	1451.7	726.355	1	13	20.03		0.0024483	1		1	284088	1	K.YKPESEELTAER.I	[327-338]	Used	Used
P43490	Nicotinamide phosphoribosyltransferase OS=Homo sapiens OX=9606 GN=NAMPT PE=1 SV=1	10	491	55.5	7.15	0	27	1	2	2	3	308099	1	0.000850581
	Master Protein Accessions	Master Protein Descriptions	Sequence	# PSMs	# Missed Cleavages	Theo. MH+ [Da]	m/z [Da] (by Search Engine): Mascot	DeltaM [ppm] (by Search Engine): Mascot	Ions Score (by Search Engine): Mascot	Top Apex RT [min]	Modifications	Qvality q-value	# Proteins		# Protein Groups	Abundance: F1764: n/a, Sample, n/a, n/a	Abundances Count: F1764: n/a, Sample, n/a, n/a	Sequence in Protein	Positions in Proteins	Quan Usage	Quan Ratio Usage
	P43490	Nicotinamide phosphoribosyltransferase OS=Homo sapiens OX=9606 GN=NAMPT PE=1 SV=1	TPAGNFVTLEEGKGDLEEYGQDLLHTVFK	2	1	3207.58	1069.87	-0.25	27			0.00165393	1		1			R.TPAGNFVTLEEGKGDLEEYGQDLLHTVFK.N	[435-463]	Not Used	Not Used
	P43490	Nicotinamide phosphoribosyltransferase OS=Homo sapiens OX=9606 GN=NAMPT PE=1 SV=1	STQAPLIIRPDSGNPLDTVLK	1	0	2235.23	745.751	1.51	13	46.8		0.0024483	1		1	308099	1	R.STQAPLIIRPDSGNPLDTVLK.V	[303-323]	Used	Used
O43707	Alpha-actinin-4 OS=Homo sapiens OX=9606 GN=ACTN4 PE=1 SV=2	5	911	104.8	5.44	0	107	1	2	3	4	294023	1	0.00113411
	Master Protein Accessions	Master Protein Descriptions	Sequence	# PSMs	# Missed Cleavages	Theo. MH+ [Da]	m/z [Da] (by Search Engine): Mascot	DeltaM [ppm] (by Search Engine): Mascot	Ions Score (by Search Engine): Mascot	Top Apex RT [min]	Modifications	Qvality q-value	# Proteins		# Protein Groups	Abundance: F1764: n/a, Sample, n/a, n/a	Abundances Count: F1764: n/a, Sample, n/a, n/a	Sequence in Protein	Positions in Proteins	Quan Usage	Quan Ratio Usage
	O43707	Alpha-actinin-4 OS=Homo sapiens OX=9606 GN=ACTN4 PE=1 SV=2	MLDAEDIVNTARPDEK	2	0	1816.87	908.94	-1.29	72	36.31		0.00165393	1		1	294023	1	K.MLDAEDIVNTARPDEK.A	[240-255]	Used	Used
	O43707	Alpha-actinin-4 OS=Homo sapiens OX=9606 GN=ACTN4 PE=1 SV=2	VEQIAAIAQELNELDYYDSHNVNTR	1	0	2905.4	969.136	-0.61	37			0.00165393	1		1			R.VEQIAAIAQELNELDYYDSHNVNTR.C	[470-494]	Not Used	Not Used
	P12814; O43707	Alpha-actinin-1 OS=Homo sapiens OX=9606 GN=ACTN1 PE=1 SV=2 Alpha-actinin-4 OS=Homo sapiens OX=9606 GN=ACTN4 PE=1 SV=2	EGLLLWCQR	1	0	1174.6	587.806	0.36	32	45.09	1xCarbamidomethyl [C7]	0.0024483	4		2	195895	1	K.EGLLLWCQR.K	[167-175]	Not Used	Not Used
P15153	Ras-related C3 botulinum toxin substrate 2 OS=Homo sapiens OX=9606 GN=RAC2 PE=1 SV=1	8	192	21.4	7.61	0.004	19	1	2	2	2	275422	1	0.000567054
	Master Protein Accessions	Master Protein Descriptions	Sequence	# PSMs	# Missed Cleavages	Theo. MH+ [Da]	m/z [Da] (by Search Engine): Mascot	DeltaM [ppm] (by Search Engine): Mascot	Ions Score (by Search Engine): Mascot	Top Apex RT [min]	Modifications	Qvality q-value	# Proteins		# Protein Groups	Abundance: F1764: n/a, Sample, n/a, n/a	Abundances Count: F1764: n/a, Sample, n/a, n/a	Sequence in Protein	Positions in Proteins	Quan Usage	Quan Ratio Usage
	P15153	Ras-related C3 botulinum toxin substrate 2 OS=Homo sapiens OX=9606 GN=RAC2 PE=1 SV=1	LAPITYPQGLALAK	1	0	1455.86	728.432	0.49	16			0.00165393	1		1			K.LAPITYPQGLALAK.E	[134-147]	Not Used	Not Used
	P15153	Ras-related C3 botulinum toxin substrate 2 OS=Homo sapiens OX=9606 GN=RAC2 PE=1 SV=1	KLAPITYPQGLALAK	1	1	1583.95	792.48	0.3	17	38.33		0.00411958	1		1	275422	1	K.KLAPITYPQGLALAK.E	[133-147]	Used	Used
Q06830	Peroxiredoxin-1 OS=Homo sapiens OX=9606 GN=PRDX1 PE=1 SV=1	18	199	22.1	8.13	0	40	1	2	2	3	230217	1	0.000850581
	Master Protein Accessions	Master Protein Descriptions	Sequence	# PSMs	# Missed Cleavages	Theo. MH+ [Da]	m/z [Da] (by Search Engine): Mascot	DeltaM [ppm] (by Search Engine): Mascot	Ions Score (by Search Engine): Mascot	Top Apex RT [min]	Modifications	Qvality q-value	# Proteins		# Protein Groups	Abundance: F1764: n/a, Sample, n/a, n/a	Abundances Count: F1764: n/a, Sample, n/a, n/a	Sequence in Protein	Positions in Proteins	Quan Usage	Quan Ratio Usage
	Q06830	Peroxiredoxin-1 OS=Homo sapiens OX=9606 GN=PRDX1 PE=1 SV=1	LNCQVIGASVDSHFCHLAWVNTPK	2	0	2753.33	918.446	-1.43	19	44.04	2xCarbamidomethyl [C3; C15]	0.00165393	1		1	230217	1	K.LNCQVIGASVDSHFCHLAWVNTPK.K	[69-92]	Used	Used
	Q06830	Peroxiredoxin-1 OS=Homo sapiens OX=9606 GN=PRDX1 PE=1 SV=1	GLFIIDDKGILR	1	1	1359.8	680.403	0.13	33			0.00456775	2		1			R.GLFIIDDKGILR.Q	[129-140]	Not Used	Not Used
P13693	Translationally-controlled tumor protein OS=Homo sapiens OX=9606 GN=TPT1 PE=1 SV=1	35	172	19.6	4.93	0	94	1	2	2	3	218908	1	0.000850581
	Master Protein Accessions	Master Protein Descriptions	Sequence	# PSMs	# Missed Cleavages	Theo. MH+ [Da]	m/z [Da] (by Search Engine): Mascot	DeltaM [ppm] (by Search Engine): Mascot	Ions Score (by Search Engine): Mascot	Top Apex RT [min]	Modifications	Qvality q-value	# Proteins		# Protein Groups	Abundance: F1764: n/a, Sample, n/a, n/a	Abundances Count: F1764: n/a, Sample, n/a, n/a	Sequence in Protein	Positions in Proteins	Quan Usage	Quan Ratio Usage
	P13693	Translationally-controlled tumor protein OS=Homo sapiens OX=9606 GN=TPT1 PE=1 SV=1	TEGNIDDSLIGGNASAEGPEGEGTESTVITGVDIVMNHHLQETSFTK	1	0	4857.26	1215.07	-0.88	28			0.00165393	1		1			R.TEGNIDDSLIGGNASAEGPEGEGTESTVITGVDIVMNHHLQETSFTK.E	[39-85]	Not Used	Not Used
	P13693	Translationally-controlled tumor protein OS=Homo sapiens OX=9606 GN=TPT1 PE=1 SV=1	DLISHDEMFSDIYK	2	0	1712.78	856.896	0.08	49	43.33		0.00165393	1		1	218908	1	R.DLISHDEMFSDIYK.I	[6-19]	Used	Used
P08758	Annexin A5 OS=Homo sapiens OX=9606 GN=ANXA5 PE=1 SV=2	25	320	35.9	5.05	0	121	1	4	4	6	217136	1	0.00170116
	Master Protein Accessions	Master Protein Descriptions	Sequence	# PSMs	# Missed Cleavages	Theo. MH+ [Da]	m/z [Da] (by Search Engine): Mascot	DeltaM [ppm] (by Search Engine): Mascot	Ions Score (by Search Engine): Mascot	Top Apex RT [min]	Modifications	Qvality q-value	# Proteins		# Protein Groups	Abundance: F1764: n/a, Sample, n/a, n/a	Abundances Count: F1764: n/a, Sample, n/a, n/a	Sequence in Protein	Positions in Proteins	Quan Usage	Quan Ratio Usage
	P08758	Annexin A5 OS=Homo sapiens OX=9606 GN=ANXA5 PE=1 SV=2	YMTISGFQIEETIDRETSGNLEQLLLAVVK	1	1	3397.76	1133.26	-1.29	42			0.00165393	1		1			K.YMTISGFQIEETIDRETSGNLEQLLLAVVK.S	[213-242]	Not Used	Not Used
	P08758	Annexin A5 OS=Homo sapiens OX=9606 GN=ANXA5 PE=1 SV=2	GLGTDEESILTLLTSR	1	0	1704.9	852.954	-0.29	75			0.00165393	1		1			K.GLGTDEESILTLLTSR.S	[30-45]	Not Used	Not Used
	P08758	Annexin A5 OS=Homo sapiens OX=9606 GN=ANXA5 PE=1 SV=2	GTVTDFPGFDERADAETLR	1	1	2096.99	699.667	-1.23	29	38.83		0.00165393	1		1	217136	1	R.GTVTDFPGFDERADAETLR.K	[7-25]	Used	Used
	P08758	Annexin A5 OS=Homo sapiens OX=9606 GN=ANXA5 PE=1 SV=2	DLLDDLKSELTGKFEK	2	2	1850.97	925.991	0.21	25			0.0024483	1		1			R.DLLDDLKSELTGKFEK.L	[64-79]	Not Used	Not Used
	P08758	Annexin A5 OS=Homo sapiens OX=9606 GN=ANXA5 PE=1 SV=2	YMTISGFQIEETIDRETSGNLEQLLLAVVK	1	1	3413.75	1138.59	-1.4	4		1xOxidation [M2]	0.00456775	1		1			K.YMTISGFQIEETIDRETSGNLEQLLLAVVK.S	[213-242]	Not Used	Not Used
P07437	Tubulin beta chain OS=Homo sapiens OX=9606 GN=TUBB PE=1 SV=2	16	444	49.6	4.89	0	187	1	3	3	7	210914	1	0.00198469
	Master Protein Accessions	Master Protein Descriptions	Sequence	# PSMs	# Missed Cleavages	Theo. MH+ [Da]	m/z [Da] (by Search Engine): Mascot	DeltaM [ppm] (by Search Engine): Mascot	Ions Score (by Search Engine): Mascot	Top Apex RT [min]	Modifications	Qvality q-value	# Proteins		# Protein Groups	Abundance: F1764: n/a, Sample, n/a, n/a	Abundances Count: F1764: n/a, Sample, n/a, n/a	Sequence in Protein	Positions in Proteins	Quan Usage	Quan Ratio Usage
	P07437	Tubulin beta chain OS=Homo sapiens OX=9606 GN=TUBB PE=1 SV=2	GHYTEGAELVDSVLDVVR	4	0	1958.98	979.995	0.11	91			0.00165393	5		1			K.GHYTEGAELVDSVLDVVR.K	[104-121]	Not Used	Not Used
	P07437	Tubulin beta chain OS=Homo sapiens OX=9606 GN=TUBB PE=1 SV=2	VSDTVVEPYNATLSVHQLVENTDETYCIDNEALYDICFR	2	0	4593.11	1149.03	-0.48	0		2xCarbamidomethyl [C27; C37]	0.0024483	5		1			K.VSDTVVEPYNATLSVHQLVENTDETYCIDNEALYDICFR.T	[175-213]	Not Used	Not Used
	P07437	Tubulin beta chain OS=Homo sapiens OX=9606 GN=TUBB PE=1 SV=2	AILVDLEPGTMDSVR	1	0	1615.84	808.42	-2.56	33	44.12		0.00456775	4		1	210914	1	R.AILVDLEPGTMDSVR.S	[63-77]	Used	Used
P13639	Elongation factor 2 OS=Homo sapiens OX=9606 GN=EEF2 PE=1 SV=4	3	858	95.3	6.83	0	104	1	2	2	2	159784	1	0.000567054
	Master Protein Accessions	Master Protein Descriptions	Sequence	# PSMs	# Missed Cleavages	Theo. MH+ [Da]	m/z [Da] (by Search Engine): Mascot	DeltaM [ppm] (by Search Engine): Mascot	Ions Score (by Search Engine): Mascot	Top Apex RT [min]	Modifications	Qvality q-value	# Proteins		# Protein Groups	Abundance: F1764: n/a, Sample, n/a, n/a	Abundances Count: F1764: n/a, Sample, n/a, n/a	Sequence in Protein	Positions in Proteins	Quan Usage	Quan Ratio Usage
	P13639	Elongation factor 2 OS=Homo sapiens OX=9606 GN=EEF2 PE=1 SV=4	STAISLFYELSENDLNFIK	1	0	2204.11	1102.56	-1.79	95			0.00165393	1		1			K.STAISLFYELSENDLNFIK.Q	[72-90]	Not Used	Not Used
	P13639	Elongation factor 2 OS=Homo sapiens OX=9606 GN=EEF2 PE=1 SV=4	VNFTVDQIR	1	0	1091.58	546.297	1.32	29	32.51		0.00411958	1		1	159784	1	M.VNFTVDQIR.A	[2-10]	Used	Used
Q16777	Histone H2A type 2-C OS=Homo sapiens OX=9606 GN=H2AC20 PE=1 SV=4	35	129	14	10.9	0	211	1	1	3	13	141855	2	0.00368585
	Master Protein Accessions	Master Protein Descriptions	Sequence	# PSMs	# Missed Cleavages	Theo. MH+ [Da]	m/z [Da] (by Search Engine): Mascot	DeltaM [ppm] (by Search Engine): Mascot	Ions Score (by Search Engine): Mascot	Top Apex RT [min]	Modifications	Qvality q-value	# Proteins		# Protein Groups	Abundance: F1764: n/a, Sample, n/a, n/a	Abundances Count: F1764: n/a, Sample, n/a, n/a	Sequence in Protein	Positions in Proteins	Quan Usage	Quan Ratio Usage
	Q16777	Histone H2A type 2-C OS=Homo sapiens OX=9606 GN=H2AC20 PE=1 SV=4	VGAGAPVYMAAVLEYLTAEILELAGNAAR	2	0	2933.54	978.52	0.84	73	68.5		0.00165393	2		1	50788.1	1	R.VGAGAPVYMAAVLEYLTAEILELAGNAAR.D	[44-72]	Used	Used
	Q16777	Histone H2A type 2-C OS=Homo sapiens OX=9606 GN=H2AC20 PE=1 SV=4	VGAGAPVYMAAVLEYLTAEILELAGNAAR	2	0	2949.54	983.849	-2.17	49	66.78	1xOxidation [M9]	0.00165393	2		1	91066.8	1	R.VGAGAPVYMAAVLEYLTAEILELAGNAAR.D	[44-72]	Used	Used
	Q16777; Q7L7L0; Q71UI9	Histone H2A type 2-C OS=Homo sapiens OX=9606 GN=H2AC20 PE=1 SV=4 Histone H2A type 3 OS=Homo sapiens OX=9606 GN=H2AC25 PE=1 SV=3 Histone H2A.V OS=Homo sapiens OX=9606 GN=H2AZ2 PE=1 SV=3	HLQLAIR	4	0	850.526	425.766	-0.46	24	26.1		0.00165393	14		3	15600335	1	R.HLQLAIR.N	[83-89]	Not Used	Not Used
	Q16777; Q7L7L0; Q71UI9	Histone H2A type 2-C OS=Homo sapiens OX=9606 GN=H2AC20 PE=1 SV=4 Histone H2A type 3 OS=Homo sapiens OX=9606 GN=H2AC25 PE=1 SV=3 Histone H2A.V OS=Homo sapiens OX=9606 GN=H2AZ2 PE=1 SV=3	AGLQFPVGR	5	0	944.531	472.769	-0.11	39	33.81		0.0024483	15		3			R.AGLQFPVGR.V	[22-30]	Not Used	Not Used
P08238	Heat shock protein HSP 90-beta OS=Homo sapiens OX=9606 GN=HSP90AB1 PE=1 SV=4	6	724	83.2	5.03	0	163	1	1	2	4	139160	1	0.00113411
	Master Protein Accessions	Master Protein Descriptions	Sequence	# PSMs	# Missed Cleavages	Theo. MH+ [Da]	m/z [Da] (by Search Engine): Mascot	DeltaM [ppm] (by Search Engine): Mascot	Ions Score (by Search Engine): Mascot	Top Apex RT [min]	Modifications	Qvality q-value	# Proteins		# Protein Groups	Abundance: F1764: n/a, Sample, n/a, n/a	Abundances Count: F1764: n/a, Sample, n/a, n/a	Sequence in Protein	Positions in Proteins	Quan Usage	Quan Ratio Usage
	P07900; P08238	Heat shock protein HSP 90-alpha OS=Homo sapiens OX=9606 GN=HSP90AA1 PE=1 SV=5 Heat shock protein HSP 90-beta OS=Homo sapiens OX=9606 GN=HSP90AB1 PE=1 SV=4	SLTNDWEDHLAVK	1	0	1527.74	764.374	-1.48	41	36.28		0.00165393	2		2	238065	1	K.SLTNDWEDHLAVK.H	[307-319]	Not Used	Not Used
	P08238	Heat shock protein HSP 90-beta OS=Homo sapiens OX=9606 GN=HSP90AB1 PE=1 SV=4	DLVVLLFETALLSSGFSLEDPQTHSNR	3	0	2988.53	996.849	0.14	88	65.87		0.00165393	1		1	139160	1	K.DLVVLLFETALLSSGFSLEDPQTHSNR.I	[653-679]	Used	Used
Q7L7L0	Histone H2A type 3 OS=Homo sapiens OX=9606 GN=H2AC25 PE=1 SV=3	35	130	14.1	11.05	0	179	1	1	3	12	95822.8	1	0.00340232
	Master Protein Accessions	Master Protein Descriptions	Sequence	# PSMs	# Missed Cleavages	Theo. MH+ [Da]	m/z [Da] (by Search Engine): Mascot	DeltaM [ppm] (by Search Engine): Mascot	Ions Score (by Search Engine): Mascot	Top Apex RT [min]	Modifications	Qvality q-value	# Proteins		# Protein Groups	Abundance: F1764: n/a, Sample, n/a, n/a	Abundances Count: F1764: n/a, Sample, n/a, n/a	Sequence in Protein	Positions in Proteins	Quan Usage	Quan Ratio Usage
	Q7L7L0	Histone H2A type 3 OS=Homo sapiens OX=9606 GN=H2AC25 PE=1 SV=3	VGAGAPVYLAAVLEYLTAEILELAGNAAR	3	0	2915.59	972.535	0.53	60	68.46		0.00165393	10		1	95822.8	1	R.VGAGAPVYLAAVLEYLTAEILELAGNAAR.D	[44-72]	Used	Used
	Q16777; Q7L7L0; Q71UI9	Histone H2A type 2-C OS=Homo sapiens OX=9606 GN=H2AC20 PE=1 SV=4 Histone H2A type 3 OS=Homo sapiens OX=9606 GN=H2AC25 PE=1 SV=3 Histone H2A.V OS=Homo sapiens OX=9606 GN=H2AZ2 PE=1 SV=3	HLQLAIR	4	0	850.526	425.766	-0.46	24	26.1		0.00165393	14		3	15600335	1	R.HLQLAIR.N	[83-89]	Not Used	Not Used
	Q16777; Q7L7L0; Q71UI9	Histone H2A type 2-C OS=Homo sapiens OX=9606 GN=H2AC20 PE=1 SV=4 Histone H2A type 3 OS=Homo sapiens OX=9606 GN=H2AC25 PE=1 SV=3 Histone H2A.V OS=Homo sapiens OX=9606 GN=H2AZ2 PE=1 SV=3	AGLQFPVGR	5	0	944.531	472.769	-0.11	39	33.81		0.0024483	15		3			R.AGLQFPVGR.V	[22-30]	Not Used	Not Used
P19338	Nucleolin OS=Homo sapiens OX=9606 GN=NCL PE=1 SV=3	5	710	76.6	4.7	0	145	1	2	2	5	52903.6	1	0.00141764
	Master Protein Accessions	Master Protein Descriptions	Sequence	# PSMs	# Missed Cleavages	Theo. MH+ [Da]	m/z [Da] (by Search Engine): Mascot	DeltaM [ppm] (by Search Engine): Mascot	Ions Score (by Search Engine): Mascot	Top Apex RT [min]	Modifications	Qvality q-value	# Proteins		# Protein Groups	Abundance: F1764: n/a, Sample, n/a, n/a	Abundances Count: F1764: n/a, Sample, n/a, n/a	Sequence in Protein	Positions in Proteins	Quan Usage	Quan Ratio Usage
	P19338	Nucleolin OS=Homo sapiens OX=9606 GN=NCL PE=1 SV=3	TLVLSNLSYSATEETLQEVFEK	4	0	2501.27	1251.14	-0.76	79	60.07		0.00165393	1		1	52903.6	1	K.TLVLSNLSYSATEETLQEVFEK.A	[487-508]	Used	Used
	P19338	Nucleolin OS=Homo sapiens OX=9606 GN=NCL PE=1 SV=3	GYAFIEFASFEDAK	1	0	1594.74	797.875	0.61	36			0.00165393	1		1			K.GYAFIEFASFEDAK.E	[524-537]	Not Used	Not Used
P06576	ATP synthase subunit beta, mitochondrial OS=Homo sapiens OX=9606 GN=ATP5F1B PE=1 SV=3	10	529	56.5	5.4	0	149	1	3	3	6			0.00170116
	Master Protein Accessions	Master Protein Descriptions	Sequence	# PSMs	# Missed Cleavages	Theo. MH+ [Da]	m/z [Da] (by Search Engine): Mascot	DeltaM [ppm] (by Search Engine): Mascot	Ions Score (by Search Engine): Mascot	Top Apex RT [min]	Modifications	Qvality q-value	# Proteins		# Protein Groups	Abundance: F1764: n/a, Sample, n/a, n/a	Abundances Count: F1764: n/a, Sample, n/a, n/a	Sequence in Protein	Positions in Proteins	Quan Usage	Quan Ratio Usage
	P06576	ATP synthase subunit beta, mitochondrial OS=Homo sapiens OX=9606 GN=ATP5F1B PE=1 SV=3	SLQDIIAILGMDELSEEDKLTVSR	2	1	2675.38	892.463	-2.76	52			0.00165393	1		1			K.SLQDIIAILGMDELSEEDKLTVSR.A	[433-456]	Not Used	Not Used
	P06576	ATP synthase subunit beta, mitochondrial OS=Homo sapiens OX=9606 GN=ATP5F1B PE=1 SV=3	SLQDIIAILGMDELSEEDKLTVSR	2	1	2691.38	897.797	0.55	47		1xOxidation [M11]	0.00165393	1		1			K.SLQDIIAILGMDELSEEDKLTVSR.A	[433-456]	Not Used	Not Used
	P06576	ATP synthase subunit beta, mitochondrial OS=Homo sapiens OX=9606 GN=ATP5F1B PE=1 SV=3	VALTGLTVAEYFRDQEGQDVLLFIDNIFR	1	1	3342.74	1114.92	0.61	31			0.00165393	1		1			R.VALTGLTVAEYFRDQEGQDVLLFIDNIFR.F	[282-310]	Not Used	Not Used
	P06576	ATP synthase subunit beta, mitochondrial OS=Homo sapiens OX=9606 GN=ATP5F1B PE=1 SV=3	DQEGQDVLLFIDNIFR	1	0	1921.97	961.488	1.7	39			0.00165393	1		1			R.DQEGQDVLLFIDNIFR.F	[295-310]	Not Used	Not Used
Q71DI3	Histone H3.2 OS=Homo sapiens OX=9606 GN=H3C13 PE=1 SV=3	40	136	15.4	11.27	0	174	1	1	3	10			0.00283527
	Master Protein Accessions	Master Protein Descriptions	Sequence	# PSMs	# Missed Cleavages	Theo. MH+ [Da]	m/z [Da] (by Search Engine): Mascot	DeltaM [ppm] (by Search Engine): Mascot	Ions Score (by Search Engine): Mascot	Top Apex RT [min]	Modifications	Qvality q-value	# Proteins		# Protein Groups	Abundance: F1764: n/a, Sample, n/a, n/a	Abundances Count: F1764: n/a, Sample, n/a, n/a	Sequence in Protein	Positions in Proteins	Quan Usage	Quan Ratio Usage
	Q71DI3	Histone H3.2 OS=Homo sapiens OX=9606 GN=H3C13 PE=1 SV=3	FQSSAVMALQEASEAYLVGLFEDTNLCAIHAK	1	0	3513.7	1171.91	0.33	62		1xCarbamidomethyl [C27]	0.00165393	1		1			R.FQSSAVMALQEASEAYLVGLFEDTNLCAIHAK.R	[85-116]	Not Used	Not Used
	Q71DI3	Histone H3.2 OS=Homo sapiens OX=9606 GN=H3C13 PE=1 SV=3	FQSSAVMALQEASEAYLVGLFEDTNLCAIHAK	1	0	3529.7	1177.23	-2.27	85		1xCarbamidomethyl [C27]; 1xOxidation [M7]	0.00165393	1		1			R.FQSSAVMALQEASEAYLVGLFEDTNLCAIHAK.R	[85-116]	Not Used	Not Used
	P84243; Q71DI3	Histone H3.3 OS=Homo sapiens OX=9606 GN=H3-3B PE=1 SV=2 Histone H3.2 OS=Homo sapiens OX=9606 GN=H3C13 PE=1 SV=3	EIAQDFKTDLR	7	1	1335.69	668.349	0.78	35	28.4		0.00165393	4		2	6.32993e+07	2	R.EIAQDFKTDLR.F	[74-84]	Not Used	Not Used
	P84243; Q71DI3	Histone H3.3 OS=Homo sapiens OX=9606 GN=H3-3B PE=1 SV=2 Histone H3.2 OS=Homo sapiens OX=9606 GN=H3C13 PE=1 SV=3	VTIMPKDIQLAR	1	1	1384.8	692.902	-0.28	25	34.31		0.00411958	5		2	250396	1	R.VTIMPKDIQLAR.R	[118-129]	Not Used	Not Used
P17655	Calpain-2 catalytic subunit OS=Homo sapiens OX=9606 GN=CAPN2 PE=1 SV=6	4	700	79.9	4.98	0	172	1	3	3	3			0.000850581
	Master Protein Accessions	Master Protein Descriptions	Sequence	# PSMs	# Missed Cleavages	Theo. MH+ [Da]	m/z [Da] (by Search Engine): Mascot	DeltaM [ppm] (by Search Engine): Mascot	Ions Score (by Search Engine): Mascot	Top Apex RT [min]	Modifications	Qvality q-value	# Proteins		# Protein Groups	Abundance: F1764: n/a, Sample, n/a, n/a	Abundances Count: F1764: n/a, Sample, n/a, n/a	Sequence in Protein	Positions in Proteins	Quan Usage	Quan Ratio Usage
	P17655	Calpain-2 catalytic subunit OS=Homo sapiens OX=9606 GN=CAPN2 PE=1 SV=6	KADYQAVDDEIEANLEEFDISEDDIDDGFR	1	1	3476.51	1159.51	1.48	51			0.00165393	1		1			K.KADYQAVDDEIEANLEEFDISEDDIDDGFR.R	[506-535]	Not Used	Not Used
	P17655	Calpain-2 catalytic subunit OS=Homo sapiens OX=9606 GN=CAPN2 PE=1 SV=6	ADYQAVDDEIEANLEEFDISEDDIDDGFRR	1	1	3504.52	1168.84	-2.35	135			0.00165393	1		1			K.ADYQAVDDEIEANLEEFDISEDDIDDGFRR.L	[507-536]	Not Used	Not Used
	P17655	Calpain-2 catalytic subunit OS=Homo sapiens OX=9606 GN=CAPN2 PE=1 SV=6	KADYQAVDDEIEANLEEFDISEDDIDDGFRR	1	2	3632.61	1211.54	-1.68	12			0.0024483	1		1			K.KADYQAVDDEIEANLEEFDISEDDIDDGFRR.L	[506-536]	Not Used	Not Used
P84243	Histone H3.3 OS=Homo sapiens OX=9606 GN=H3-3B PE=1 SV=2	40	136	15.3	11.27	0	79	1	1	3	9			0.00255174
	Master Protein Accessions	Master Protein Descriptions	Sequence	# PSMs	# Missed Cleavages	Theo. MH+ [Da]	m/z [Da] (by Search Engine): Mascot	DeltaM [ppm] (by Search Engine): Mascot	Ions Score (by Search Engine): Mascot	Top Apex RT [min]	Modifications	Qvality q-value	# Proteins		# Protein Groups	Abundance: F1764: n/a, Sample, n/a, n/a	Abundances Count: F1764: n/a, Sample, n/a, n/a	Sequence in Protein	Positions in Proteins	Quan Usage	Quan Ratio Usage
	P84243	Histone H3.3 OS=Homo sapiens OX=9606 GN=H3-3B PE=1 SV=2	FQSAAIGALQEASEAYLVGLFEDTNLCAIHAK	1	0	3437.7	1146.57	0.39	32		1xCarbamidomethyl [C27]	0.00165393	1		1			R.FQSAAIGALQEASEAYLVGLFEDTNLCAIHAK.R	[85-116]	Not Used	Not Used
	P84243; Q71DI3	Histone H3.3 OS=Homo sapiens OX=9606 GN=H3-3B PE=1 SV=2 Histone H3.2 OS=Homo sapiens OX=9606 GN=H3C13 PE=1 SV=3	EIAQDFKTDLR	7	1	1335.69	668.349	0.78	35	28.4		0.00165393	4		2	6.32993e+07	2	R.EIAQDFKTDLR.F	[74-84]	Not Used	Not Used
	P84243; Q71DI3	Histone H3.3 OS=Homo sapiens OX=9606 GN=H3-3B PE=1 SV=2 Histone H3.2 OS=Homo sapiens OX=9606 GN=H3C13 PE=1 SV=3	VTIMPKDIQLAR	1	1	1384.8	692.902	-0.28	25	34.31		0.00411958	5		2	250396	1	R.VTIMPKDIQLAR.R	[118-129]	Not Used	Not Used
P60842	Eukaryotic initiation factor 4A-I OS=Homo sapiens OX=9606 GN=EIF4A1 PE=1 SV=1	19	406	46.1	5.48	0	83	1	3	3	4			0.00113411
	Master Protein Accessions	Master Protein Descriptions	Sequence	# PSMs	# Missed Cleavages	Theo. MH+ [Da]	m/z [Da] (by Search Engine): Mascot	DeltaM [ppm] (by Search Engine): Mascot	Ions Score (by Search Engine): Mascot	Top Apex RT [min]	Modifications	Qvality q-value	# Proteins		# Protein Groups	Abundance: F1764: n/a, Sample, n/a, n/a	Abundances Count: F1764: n/a, Sample, n/a, n/a	Sequence in Protein	Positions in Proteins	Quan Usage	Quan Ratio Usage
	P60842	Eukaryotic initiation factor 4A-I OS=Homo sapiens OX=9606 GN=EIF4A1 PE=1 SV=1	TATFAISILQQIELDLK	1	0	1904.07	952.54	-0.28	29			0.00165393	1		1			K.TATFAISILQQIELDLK.A	[83-99]	Not Used	Not Used
	P60842	Eukaryotic initiation factor 4A-I OS=Homo sapiens OX=9606 GN=EIF4A1 PE=1 SV=1	SRDNGPDGMEPEGVIESNWNEIVDSFDDMNLSESLLR	1	1	4166.86	1389.63	3.83	24			0.00165393	1		1			R.SRDNGPDGMEPEGVIESNWNEIVDSFDDMNLSESLLR.G	[9-45]	Not Used	Not Used
	P60842	Eukaryotic initiation factor 4A-I OS=Homo sapiens OX=9606 GN=EIF4A1 PE=1 SV=1	SRDNGPDGMEPEGVIESNWNEIVDSFDDMNLSESLLR	1	1	4182.85	1394.96	2.09	59		1xOxidation [M9]	0.00165393	1		1			R.SRDNGPDGMEPEGVIESNWNEIVDSFDDMNLSESLLR.G	[9-45]	Not Used	Not Used
	P60842	Eukaryotic initiation factor 4A-I OS=Homo sapiens OX=9606 GN=EIF4A1 PE=1 SV=1	LDTLCDLYETLTITQAVIFINTR	1	0	2713.41	905.143	1.24	4		1xCarbamidomethyl [C5]	0.00411958	1		1			K.LDTLCDLYETLTITQAVIFINTR.R	[260-282]	Not Used	Not Used
P40121	Macrophage-capping protein OS=Homo sapiens OX=9606 GN=CAPG PE=1 SV=2	8	348	38.5	6.19	0	79	1	2	2	3			0.000850581
	Master Protein Accessions	Master Protein Descriptions	Sequence	# PSMs	# Missed Cleavages	Theo. MH+ [Da]	m/z [Da] (by Search Engine): Mascot	DeltaM [ppm] (by Search Engine): Mascot	Ions Score (by Search Engine): Mascot	Top Apex RT [min]	Modifications	Qvality q-value	# Proteins		# Protein Groups	Abundance: F1764: n/a, Sample, n/a, n/a	Abundances Count: F1764: n/a, Sample, n/a, n/a	Sequence in Protein	Positions in Proteins	Quan Usage	Quan Ratio Usage
	P40121	Macrophage-capping protein OS=Homo sapiens OX=9606 GN=CAPG PE=1 SV=2	VSDATGQMNLTK	1	0	1264.62	632.814	0.22	34			0.00165393	1		1			K.VSDATGQMNLTK.V	[254-265]	Not Used	Not Used
	P40121	Macrophage-capping protein OS=Homo sapiens OX=9606 GN=CAPG PE=1 SV=2	EVQGNESDLFMSYFPR	2	0	1918.86	959.936	0.15	56			0.00165393	1		1			R.EVQGNESDLFMSYFPR.G	[97-112]	Not Used	Not Used
P01023	Alpha-2-macroglobulin OS=Homo sapiens OX=9606 GN=A2M PE=1 SV=3	3	1474	163.2	6.46	0	42	1	2	2	3			0.000850581
	Master Protein Accessions	Master Protein Descriptions	Sequence	# PSMs	# Missed Cleavages	Theo. MH+ [Da]	m/z [Da] (by Search Engine): Mascot	DeltaM [ppm] (by Search Engine): Mascot	Ions Score (by Search Engine): Mascot	Top Apex RT [min]	Modifications	Qvality q-value	# Proteins		# Protein Groups	Abundance: F1764: n/a, Sample, n/a, n/a	Abundances Count: F1764: n/a, Sample, n/a, n/a	Sequence in Protein	Positions in Proteins	Quan Usage	Quan Ratio Usage
	P01023	Alpha-2-macroglobulin OS=Homo sapiens OX=9606 GN=A2M PE=1 SV=3	GGVEDEVTLSAYITIALLEIPLTVTHPVVR	2	0	3205.77	1069.26	-2.3	34			0.00165393	1		1			K.GGVEDEVTLSAYITIALLEIPLTVTHPVVR.N	[1093-1122]	Not Used	Not Used
	P01023	Alpha-2-macroglobulin OS=Homo sapiens OX=9606 GN=A2M PE=1 SV=3	AYIFIDEAHITQALIWLSQR	1	0	2388.27	796.763	1.58	20			0.00165393	1		1			R.AYIFIDEAHITQALIWLSQR.Q	[1054-1073]	Not Used	Not Used
P31946	14-3-3 protein beta/alpha OS=Homo sapiens OX=9606 GN=YWHAB PE=1 SV=3	18	246	28.1	4.83	0	71	1	1	2	4			0.00113411
	Master Protein Accessions	Master Protein Descriptions	Sequence	# PSMs	# Missed Cleavages	Theo. MH+ [Da]	m/z [Da] (by Search Engine): Mascot	DeltaM [ppm] (by Search Engine): Mascot	Ions Score (by Search Engine): Mascot	Top Apex RT [min]	Modifications	Qvality q-value	# Proteins		# Protein Groups	Abundance: F1764: n/a, Sample, n/a, n/a	Abundances Count: F1764: n/a, Sample, n/a, n/a	Sequence in Protein	Positions in Proteins	Quan Usage	Quan Ratio Usage
	P31946	14-3-3 protein beta/alpha OS=Homo sapiens OX=9606 GN=YWHAB PE=1 SV=3	TAFDEAIAELDTLNEESYKDSTLIMQLLR	1	1	3329.65	1110.56	1.64	30			0.00165393	1		1			K.TAFDEAIAELDTLNEESYKDSTLIMQLLR.D	[196-224]	Not Used	Not Used
	P31946; P61981	14-3-3 protein beta/alpha OS=Homo sapiens OX=9606 GN=YWHAB PE=1 SV=3 14-3-3 protein gamma OS=Homo sapiens OX=9606 GN=YWHAG PE=1 SV=2	LAEQAERYDDMAAAMK	3	1	1812.83	604.946	-1.6	36	29.41		0.00165393	2		2	689936	2	K.LAEQAERYDDMAAAMK.A	[14-29]	Not Used	Not Used
P61981	14-3-3 protein gamma OS=Homo sapiens OX=9606 GN=YWHAG PE=1 SV=2	18	247	28.3	4.89	0	55	1	1	2	4			0.00113411
	Master Protein Accessions	Master Protein Descriptions	Sequence	# PSMs	# Missed Cleavages	Theo. MH+ [Da]	m/z [Da] (by Search Engine): Mascot	DeltaM [ppm] (by Search Engine): Mascot	Ions Score (by Search Engine): Mascot	Top Apex RT [min]	Modifications	Qvality q-value	# Proteins		# Protein Groups	Abundance: F1764: n/a, Sample, n/a, n/a	Abundances Count: F1764: n/a, Sample, n/a, n/a	Sequence in Protein	Positions in Proteins	Quan Usage	Quan Ratio Usage
	P31946; P61981	14-3-3 protein beta/alpha OS=Homo sapiens OX=9606 GN=YWHAB PE=1 SV=3 14-3-3 protein gamma OS=Homo sapiens OX=9606 GN=YWHAG PE=1 SV=2	LAEQAERYDDMAAAMK	3	1	1812.83	604.946	-1.6	36	29.41		0.00165393	2		2	689936	2	R.LAEQAERYDDMAAAMK.N	[13-28]	Not Used	Not Used
	P61981	14-3-3 protein gamma OS=Homo sapiens OX=9606 GN=YWHAG PE=1 SV=2	TAFDDAIAELDTLNEDSYKDSTLIMQLLR	1	1	3301.61	1101.21	0.63	7			0.0024483	1		1			K.TAFDDAIAELDTLNEDSYKDSTLIMQLLR.D	[199-227]	Not Used	Not Used
P27635	60S ribosomal protein L10 OS=Homo sapiens OX=9606 GN=RPL10 PE=1 SV=5	14	214	24.6	10.08	0	58	1	2	2	3			0.000850581
	Master Protein Accessions	Master Protein Descriptions	Sequence	# PSMs	# Missed Cleavages	Theo. MH+ [Da]	m/z [Da] (by Search Engine): Mascot	DeltaM [ppm] (by Search Engine): Mascot	Ions Score (by Search Engine): Mascot	Top Apex RT [min]	Modifications	Qvality q-value	# Proteins		# Protein Groups	Abundance: F1764: n/a, Sample, n/a, n/a	Abundances Count: F1764: n/a, Sample, n/a, n/a	Sequence in Protein	Positions in Proteins	Quan Usage	Quan Ratio Usage
	P27635	60S ribosomal protein L10 OS=Homo sapiens OX=9606 GN=RPL10 PE=1 SV=5	VDEFPLCGHMVSDEYEQLSSEALEAAR	1	0	3082.38	1028.13	0.75	53		1xCarbamidomethyl [C7]	0.00165393	1		1			K.VDEFPLCGHMVSDEYEQLSSEALEAAR.I	[43-69]	Not Used	Not Used
	P27635	60S ribosomal protein L10 OS=Homo sapiens OX=9606 GN=RPL10 PE=1 SV=5	AKVDEFPLCGHMVSDEYEQLSSEALEAAR	1	1	3281.51	1094.51	-0.28	20		1xCarbamidomethyl [C9]	0.00165393	1		1			K.AKVDEFPLCGHMVSDEYEQLSSEALEAAR.I	[41-69]	Not Used	Not Used
	P27635	60S ribosomal protein L10 OS=Homo sapiens OX=9606 GN=RPL10 PE=1 SV=5	VDEFPLCGHMVSDEYEQLSSEALEAAR	1	0	3098.37	1033.46	-0.22	13		1xCarbamidomethyl [C7]; 1xOxidation [M10]	0.0024483	1		1			K.VDEFPLCGHMVSDEYEQLSSEALEAAR.I	[43-69]	Not Used	Not Used
O75015	Low affinity immunoglobulin gamma Fc region receptor III-B OS=Homo sapiens OX=9606 GN=FCGR3B PE=1 SV=2	19	233	26.2	6.71	0	858	1	1	4	66			0.0187128
	Master Protein Accessions	Master Protein Descriptions	Sequence	# PSMs	# Missed Cleavages	Theo. MH+ [Da]	m/z [Da] (by Search Engine): Mascot	DeltaM [ppm] (by Search Engine): Mascot	Ions Score (by Search Engine): Mascot	Top Apex RT [min]	Modifications	Qvality q-value	# Proteins		# Protein Groups	Abundance: F1764: n/a, Sample, n/a, n/a	Abundances Count: F1764: n/a, Sample, n/a, n/a	Sequence in Protein	Positions in Proteins	Quan Usage	Quan Ratio Usage
	P08637; O75015	Low affinity immunoglobulin gamma Fc region receptor III-A OS=Homo sapiens OX=9606 GN=FCGR3A PE=1 SV=2 Low affinity immunoglobulin gamma Fc region receptor III-B OS=Homo sapiens OX=9606 GN=FCGR3B PE=1 SV=2	WVFKEEDPIHLR	57	1	1568.82	523.612	-0.49	32	41.94		0.00165393	2		2	3.52042e+07	16	R.WVFKEEDPIHLR.C	[116-127]	Not Used	Not Used
	P08637; O75015	Low affinity immunoglobulin gamma Fc region receptor III-A OS=Homo sapiens OX=9606 GN=FCGR3A PE=1 SV=2 Low affinity immunoglobulin gamma Fc region receptor III-B OS=Homo sapiens OX=9606 GN=FCGR3B PE=1 SV=2	ATLKDSGSYFCR	6	1	1404.66	702.832	0	26	24.77	1xCarbamidomethyl [C11]	0.00165393	2		2	1.51679e+07	2	K.ATLKDSGSYFCR.G	[162-173]	Not Used	Not Used
	P08637; O75015	Low affinity immunoglobulin gamma Fc region receptor III-A OS=Homo sapiens OX=9606 GN=FCGR3A PE=1 SV=2 Low affinity immunoglobulin gamma Fc region receptor III-B OS=Homo sapiens OX=9606 GN=FCGR3B PE=1 SV=2	DSGSYFCR	2	0	991.394	496.201	0.09	44	22.29	1xCarbamidomethyl [C7]	0.00165393	2		2	4.50062e+06	1	K.DSGSYFCR.G	[166-173]	Not Used	Not Used
	O75015	Low affinity immunoglobulin gamma Fc region receptor III-B OS=Homo sapiens OX=9606 GN=FCGR3B PE=1 SV=2	AVVFLEPQWYSVLEKDSVTLK	1	1	2451.32	817.778	1.13	14			0.0024483	1		1			K.AVVFLEPQWYSVLEKDSVTLK.C	[26-46]	Not Used	Not Used
Q71UI9	Histone H2A.V OS=Homo sapiens OX=9606 GN=H2AZ2 PE=1 SV=3	35	128	13.5	10.58	0	87	1	1	3	11			0.0031188
	Master Protein Accessions	Master Protein Descriptions	Sequence	# PSMs	# Missed Cleavages	Theo. MH+ [Da]	m/z [Da] (by Search Engine): Mascot	DeltaM [ppm] (by Search Engine): Mascot	Ions Score (by Search Engine): Mascot	Top Apex RT [min]	Modifications	Qvality q-value	# Proteins		# Protein Groups	Abundance: F1764: n/a, Sample, n/a, n/a	Abundances Count: F1764: n/a, Sample, n/a, n/a	Sequence in Protein	Positions in Proteins	Quan Usage	Quan Ratio Usage
	Q71UI9	Histone H2A.V OS=Homo sapiens OX=9606 GN=H2AZ2 PE=1 SV=3	VGATAAVYSAAILEYLTAEVLELAGNASK	2	0	2895.53	965.85	-0.16	14			0.00165393	2		1			R.VGATAAVYSAAILEYLTAEVLELAGNASK.D	[47-75]	Not Used	Not Used
	Q16777; Q7L7L0; Q71UI9	Histone H2A type 2-C OS=Homo sapiens OX=9606 GN=H2AC20 PE=1 SV=4 Histone H2A type 3 OS=Homo sapiens OX=9606 GN=H2AC25 PE=1 SV=3 Histone H2A.V OS=Homo sapiens OX=9606 GN=H2AZ2 PE=1 SV=3	HLQLAIR	4	0	850.526	425.766	-0.46	24	26.1		0.00165393	14		3	15600335	1	R.HLQLAIR.G	[86-92]	Not Used	Not Used
	Q16777; Q7L7L0; Q71UI9	Histone H2A type 2-C OS=Homo sapiens OX=9606 GN=H2AC20 PE=1 SV=4 Histone H2A type 3 OS=Homo sapiens OX=9606 GN=H2AC25 PE=1 SV=3 Histone H2A.V OS=Homo sapiens OX=9606 GN=H2AZ2 PE=1 SV=3	AGLQFPVGR	5	0	944.531	472.769	-0.11	39	33.81		0.0024483	15		3			R.AGLQFPVGR.I	[24-32]	Not Used	Not Used
P07900	Heat shock protein HSP 90-alpha OS=Homo sapiens OX=9606 GN=HSP90AA1 PE=1 SV=5	11	732	84.6	5.02	0	86	1	2	3	3			0.000850581
	Master Protein Accessions	Master Protein Descriptions	Sequence	# PSMs	# Missed Cleavages	Theo. MH+ [Da]	m/z [Da] (by Search Engine): Mascot	DeltaM [ppm] (by Search Engine): Mascot	Ions Score (by Search Engine): Mascot	Top Apex RT [min]	Modifications	Qvality q-value	# Proteins		# Protein Groups	Abundance: F1764: n/a, Sample, n/a, n/a	Abundances Count: F1764: n/a, Sample, n/a, n/a	Sequence in Protein	Positions in Proteins	Quan Usage	Quan Ratio Usage
	P07900	Heat shock protein HSP 90-alpha OS=Homo sapiens OX=9606 GN=HSP90AA1 PE=1 SV=5	PEETQTQDQPMEEEEVETFAFQAEIAQLMSLIINTFYSNK	1	0	4695.16	1174.54	-2.06	15		1xOxidation [M11]	0.00165393	2		1			M.PEETQTQDQPMEEEEVETFAFQAEIAQLMSLIINTFYSNK.E	[2-41]	Not Used	Not Used
	P07900; P08238	Heat shock protein HSP 90-alpha OS=Homo sapiens OX=9606 GN=HSP90AA1 PE=1 SV=5 Heat shock protein HSP 90-beta OS=Homo sapiens OX=9606 GN=HSP90AB1 PE=1 SV=4	SLTNDWEDHLAVK	1	0	1527.74	764.374	-1.48	41	36.28		0.00165393	2		2	238065	1	K.SLTNDWEDHLAVK.H	[315-327]	Not Used	Not Used
	P07900	Heat shock protein HSP 90-alpha OS=Homo sapiens OX=9606 GN=HSP90AA1 PE=1 SV=5	DLVILLYETALLSSGFSLEDPQTHANR	1	0	3002.55	1001.52	0.28	62			0.00165393	1		1			K.DLVILLYETALLSSGFSLEDPQTHANR.I	[661-687]	Not Used	Not Used
P10809	60 kDa heat shock protein, mitochondrial OS=Homo sapiens OX=9606 GN=HSPD1 PE=1 SV=2	6	573	61	5.87	0	23	1	2	2	2			0.000567054
	Master Protein Accessions	Master Protein Descriptions	Sequence	# PSMs	# Missed Cleavages	Theo. MH+ [Da]	m/z [Da] (by Search Engine): Mascot	DeltaM [ppm] (by Search Engine): Mascot	Ions Score (by Search Engine): Mascot	Top Apex RT [min]	Modifications	Qvality q-value	# Proteins		# Protein Groups	Abundance: F1764: n/a, Sample, n/a, n/a	Abundances Count: F1764: n/a, Sample, n/a, n/a	Sequence in Protein	Positions in Proteins	Quan Usage	Quan Ratio Usage
	P10809	60 kDa heat shock protein, mitochondrial OS=Homo sapiens OX=9606 GN=HSPD1 PE=1 SV=2	ALMLQGVDLLADAVAVTMGPK	1	0	2113.14	705.051	0.09	23			0.00165393	1		1			R.ALMLQGVDLLADAVAVTMGPK.G	[38-58]	Not Used	Not Used
	P10809	60 kDa heat shock protein, mitochondrial OS=Homo sapiens OX=9606 GN=HSPD1 PE=1 SV=2	GVMLAVDAVIAELKK	1	1	1556.91	778.957	-0.39	13			0.00839836	1		1			R.GVMLAVDAVIAELKK.Q	[143-157]	Not Used	Not Used
Q00610	Clathrin heavy chain 1 OS=Homo sapiens OX=9606 GN=CLTC PE=1 SV=5	4	1675	191.5	5.69	0	47	1	3	3	3			0.000850581
	Master Protein Accessions	Master Protein Descriptions	Sequence	# PSMs	# Missed Cleavages	Theo. MH+ [Da]	m/z [Da] (by Search Engine): Mascot	DeltaM [ppm] (by Search Engine): Mascot	Ions Score (by Search Engine): Mascot	Top Apex RT [min]	Modifications	Qvality q-value	# Proteins		# Protein Groups	Abundance: F1764: n/a, Sample, n/a, n/a	Abundances Count: F1764: n/a, Sample, n/a, n/a	Sequence in Protein	Positions in Proteins	Quan Usage	Quan Ratio Usage
	Q00610	Clathrin heavy chain 1 OS=Homo sapiens OX=9606 GN=CLTC PE=1 SV=5	DTELAEELLQWFLQEEK	1	0	2121.04	1061.02	-0.31	40			0.00165393	1		1			K.DTELAEELLQWFLQEEK.R	[1546-1562]	Not Used	Not Used
	Q00610	Clathrin heavy chain 1 OS=Homo sapiens OX=9606 GN=CLTC PE=1 SV=5	KFDVNTSAVQVLIEHIGNLDR	1	1	2368.26	790.093	0.58	21			0.00165393	1		1			R.KFDVNTSAVQVLIEHIGNLDR.A	[1074-1094]	Not Used	Not Used
	Q00610	Clathrin heavy chain 1 OS=Homo sapiens OX=9606 GN=CLTC PE=1 SV=5	LDNYDAPDIANIAISNELFEEAFAIFR	1	0	3071.5	1024.51	0.57	14			0.00456775	1		1			R.LDNYDAPDIANIAISNELFEEAFAIFR.K	[1047-1073]	Not Used	Not Used

## Sheet: A549
Accession	Description	Coverage [%]	# AAs	MW [kDa]	calc. pI	Exp. q-value: Combined	Score Mascot: Mascot	# Protein Groups	# Unique Peptides	# Peptides	# PSMs	Abundance: A549	Abundances Count: A549	Relative abundance (%)
P16402	Histone H1.3 OS=Homo sapiens OX=9606 GN=H1-3 PE=1 SV=2	47	221	22.3	11.02	0	1955	1	4	22	119	4.18678e+08	4	0.0161378
	Master Protein Accessions	Master Protein Descriptions	Sequence	# PSMs	# Missed Cleavages	Theo. MH+ [Da]	m/z [Da] (by Search Engine): Mascot	DeltaM [ppm] (by Search Engine): Mascot	Ions Score (by Search Engine): Mascot	Top Apex RT [min]	Modifications	Qvality q-value	# Proteins		# Protein Groups	Abundance: F1763: n/a, Sample, n/a, n/a	Abundances Count: F1763: n/a, Sample, n/a, n/a	Sequence in Protein	Positions in Proteins	Quan Usage	Quan Ratio Usage
	P16402; P10412; P16403	Histone H1.3 OS=Homo sapiens OX=9606 GN=H1-3 PE=1 SV=2 Histone H1.4 OS=Homo sapiens OX=9606 GN=H1-4 PE=1 SV=2 Histone H1.2 OS=Homo sapiens OX=9606 GN=H1-2 PE=1 SV=2	KASGPPVSELITKAVAASK	2	2	1854.07	618.695	0.4	41	40.79		0.000156394	3		3	949588	1	R.KASGPPVSELITKAVAASK.E	[35-53]	Not Used	Not Used
	P16402; P10412; P16403	Histone H1.3 OS=Homo sapiens OX=9606 GN=H1-3 PE=1 SV=2 Histone H1.4 OS=Homo sapiens OX=9606 GN=H1-4 PE=1 SV=2 Histone H1.2 OS=Homo sapiens OX=9606 GN=H1-2 PE=1 SV=2	KASGPPVSELITK	18	1	1326.76	663.885	-0.32	51	27.77		0.000156394	3		3	2.29139e+08	3	R.KASGPPVSELITK.A	[35-47]	Not Used	Not Used
	P16402	Histone H1.3 OS=Homo sapiens OX=9606 GN=H1-3 PE=1 SV=2	SETAPLAPTIPAPAEKTPVK	2	1	2060.13	1030.57	-1.11	46	34.08	1xAcetyl [N-Term]	0.000156394	1		1	621510	1	M.SETAPLAPTIPAPAEKTPVK.K	[2-21]	Used	Used
	P16402; P10412; P16403	Histone H1.3 OS=Homo sapiens OX=9606 GN=H1-3 PE=1 SV=2 Histone H1.4 OS=Homo sapiens OX=9606 GN=H1-4 PE=1 SV=2 Histone H1.2 OS=Homo sapiens OX=9606 GN=H1-2 PE=1 SV=2	SGVSLAALKK	12	1	973.604	487.306	-0.33	64	24.75		0.000156394	3		3	248819445	2	R.SGVSLAALKK.A	[56-65]	Not Used	Not Used
	P16402; P10412; P16403	Histone H1.3 OS=Homo sapiens OX=9606 GN=H1-3 PE=1 SV=2 Histone H1.4 OS=Homo sapiens OX=9606 GN=H1-4 PE=1 SV=2 Histone H1.2 OS=Homo sapiens OX=9606 GN=H1-2 PE=1 SV=2	SGVSLAALK	2	0	845.509	423.258	-0.47	42	30.5		0.000156394	3		3	1.27454e+06	1	R.SGVSLAALK.K	[56-64]	Not Used	Not Used
	P16402; P10412	Histone H1.3 OS=Homo sapiens OX=9606 GN=H1-3 PE=1 SV=2 Histone H1.4 OS=Homo sapiens OX=9606 GN=H1-4 PE=1 SV=2	RKASGPPVSELITK	24	2	1482.86	494.959	-0.03	35	26.61		0.000156394	2		2	6.51444e+07	5	K.RKASGPPVSELITK.A	[34-47]	Not Used	Not Used
	P16401; P16402; P10412; P16403; Q02539	Histone H1.5 OS=Homo sapiens OX=9606 GN=H1-5 PE=1 SV=3 Histone H1.3 OS=Homo sapiens OX=9606 GN=H1-3 PE=1 SV=2 Histone H1.4 OS=Homo sapiens OX=9606 GN=H1-4 PE=1 SV=2 Histone H1.2 OS=Homo sapiens OX=9606 GN=H1-2 PE=1 SV=2 Histone H1.1 OS=Homo sapiens OX=9606 GN=H1-1 PE=1 SV=3	SLVSKGTLVQTKGTGASGSFK	2	2	2053.13	685.048	0.66	20	24.81		0.000156394	5		5	3.48762e+06	1	K.SLVSKGTLVQTKGTGASGSFK.L	[87-107]	Not Used	Not Used
	P16401; P16402; P10412; P16403; Q02539	Histone H1.5 OS=Homo sapiens OX=9606 GN=H1-5 PE=1 SV=3 Histone H1.3 OS=Homo sapiens OX=9606 GN=H1-3 PE=1 SV=2 Histone H1.4 OS=Homo sapiens OX=9606 GN=H1-4 PE=1 SV=2 Histone H1.2 OS=Homo sapiens OX=9606 GN=H1-2 PE=1 SV=2 Histone H1.1 OS=Homo sapiens OX=9606 GN=H1-1 PE=1 SV=3	SLVSKGTLVQTK	5	1	1260.75	630.879	-0.49	60	22.15		0.000156394	5		5	72195745	2	K.SLVSKGTLVQTK.G	[87-98]	Not Used	Not Used
	P16402; P10412; P16403; Q02539	Histone H1.3 OS=Homo sapiens OX=9606 GN=H1-3 PE=1 SV=2 Histone H1.4 OS=Homo sapiens OX=9606 GN=H1-4 PE=1 SV=2 Histone H1.2 OS=Homo sapiens OX=9606 GN=H1-2 PE=1 SV=2 Histone H1.1 OS=Homo sapiens OX=9606 GN=H1-1 PE=1 SV=3	ALAAAGYDVEK	2	0	1107.57	554.288	0.37	48	23.18		0.000156394	5		4	1.93699e+06	1	K.ALAAAGYDVEK.N	[66-76]	Not Used	Not Used
	P16402; P10412; P16403; Q02539	Histone H1.3 OS=Homo sapiens OX=9606 GN=H1-3 PE=1 SV=2 Histone H1.4 OS=Homo sapiens OX=9606 GN=H1-4 PE=1 SV=2 Histone H1.2 OS=Homo sapiens OX=9606 GN=H1-2 PE=1 SV=2 Histone H1.1 OS=Homo sapiens OX=9606 GN=H1-1 PE=1 SV=3	ALAAAGYDVEKNNSR	4	1	1578.79	789.898	0.73	66	20.66		0.000156394	5		4	63378280	2	K.ALAAAGYDVEKNNSR.I	[66-80]	Not Used	Not Used
	P16402; P10412; P16403	Histone H1.3 OS=Homo sapiens OX=9606 GN=H1-3 PE=1 SV=2 Histone H1.4 OS=Homo sapiens OX=9606 GN=H1-4 PE=1 SV=2 Histone H1.2 OS=Homo sapiens OX=9606 GN=H1-2 PE=1 SV=2	ERSGVSLAALKK	6	2	1258.75	420.254	-1.15	42	23.01		0.000156394	3		3	9.21986e+06	2	K.ERSGVSLAALKK.A	[54-65]	Not Used	Not Used
	P16401; P16402; P10412; P16403; Q02539	Histone H1.5 OS=Homo sapiens OX=9606 GN=H1-5 PE=1 SV=3 Histone H1.3 OS=Homo sapiens OX=9606 GN=H1-3 PE=1 SV=2 Histone H1.4 OS=Homo sapiens OX=9606 GN=H1-4 PE=1 SV=2 Histone H1.2 OS=Homo sapiens OX=9606 GN=H1-2 PE=1 SV=2 Histone H1.1 OS=Homo sapiens OX=9606 GN=H1-1 PE=1 SV=3	GTLVQTKGTGASGSFKLNK	2	2	1894.04	632.018	-0.33	25	24.08		0.000156394	5		5	7940971	1	K.GTLVQTKGTGASGSFKLNK.K	[92-110]	Not Used	Not Used
	P16401; P16402; P10412; P16403; Q02539	Histone H1.5 OS=Homo sapiens OX=9606 GN=H1-5 PE=1 SV=3 Histone H1.3 OS=Homo sapiens OX=9606 GN=H1-3 PE=1 SV=2 Histone H1.4 OS=Homo sapiens OX=9606 GN=H1-4 PE=1 SV=2 Histone H1.2 OS=Homo sapiens OX=9606 GN=H1-2 PE=1 SV=2 Histone H1.1 OS=Homo sapiens OX=9606 GN=H1-1 PE=1 SV=3	GTLVQTKGTGASGSFK	3	1	1538.82	769.913	1.23	75	20.73		0.000156394	5		5	2.05114e+06	2	K.GTLVQTKGTGASGSFK.L	[92-107]	Not Used	Not Used
	P16401; P16402; P10412; P16403; Q02539	Histone H1.5 OS=Homo sapiens OX=9606 GN=H1-5 PE=1 SV=3 Histone H1.3 OS=Homo sapiens OX=9606 GN=H1-3 PE=1 SV=2 Histone H1.4 OS=Homo sapiens OX=9606 GN=H1-4 PE=1 SV=2 Histone H1.2 OS=Homo sapiens OX=9606 GN=H1-2 PE=1 SV=2 Histone H1.1 OS=Homo sapiens OX=9606 GN=H1-1 PE=1 SV=3	GTGASGSFKLNK	6	1	1166.62	583.812	0.05	41	19.72		0.000156394	5		5	25467086	1	K.GTGASGSFKLNK.K	[99-110]	Not Used	Not Used
	P16402; P10412; P16403; Q02539	Histone H1.3 OS=Homo sapiens OX=9606 GN=H1-3 PE=1 SV=2 Histone H1.4 OS=Homo sapiens OX=9606 GN=H1-4 PE=1 SV=2 Histone H1.2 OS=Homo sapiens OX=9606 GN=H1-2 PE=1 SV=2 Histone H1.1 OS=Homo sapiens OX=9606 GN=H1-1 PE=1 SV=3	KALAAAGYDVEKNNSR	5	2	1706.88	853.945	0.28	74	19		0.000156394	5		4	8.21418e+06	2	K.KALAAAGYDVEKNNSR.I	[65-80]	Not Used	Not Used
	P16402	Histone H1.3 OS=Homo sapiens OX=9606 GN=H1-3 PE=1 SV=2	SETAPLAPTIPAPAEKTPVKK	6	2	2188.22	1094.62	0.27	47	30.47	1xAcetyl [N-Term]	0.000476848	1		1	2.25285e+07	2	M.SETAPLAPTIPAPAEKTPVKK.K	[2-22]	Used	Used
	P16402; P10412; P16403	Histone H1.3 OS=Homo sapiens OX=9606 GN=H1-3 PE=1 SV=2 Histone H1.4 OS=Homo sapiens OX=9606 GN=H1-4 PE=1 SV=2 Histone H1.2 OS=Homo sapiens OX=9606 GN=H1-2 PE=1 SV=2	ASGPPVSELITK	1	0	1198.67	599.838	0.85	31	31.78		0.000476848	3		3	6658951	1	K.ASGPPVSELITK.A	[36-47]	Not Used	Not Used
	P16401; P16402; P10412; P16403; Q02539	Histone H1.5 OS=Homo sapiens OX=9606 GN=H1-5 PE=1 SV=3 Histone H1.3 OS=Homo sapiens OX=9606 GN=H1-3 PE=1 SV=2 Histone H1.4 OS=Homo sapiens OX=9606 GN=H1-4 PE=1 SV=2 Histone H1.2 OS=Homo sapiens OX=9606 GN=H1-2 PE=1 SV=2 Histone H1.1 OS=Homo sapiens OX=9606 GN=H1-1 PE=1 SV=3	GTGASGSFKLNKK	12	2	1294.71	647.859	-0.11	19	18		0.000476848	5		5	5.2487e+07	3	K.GTGASGSFKLNKK.A	[99-111]	Not Used	Not Used
	P16402; P10412; P16403; Q02539	Histone H1.3 OS=Homo sapiens OX=9606 GN=H1-3 PE=1 SV=2 Histone H1.4 OS=Homo sapiens OX=9606 GN=H1-4 PE=1 SV=2 Histone H1.2 OS=Homo sapiens OX=9606 GN=H1-2 PE=1 SV=2 Histone H1.1 OS=Homo sapiens OX=9606 GN=H1-1 PE=1 SV=3	KALAAAGYDVEK	2	1	1235.66	618.334	-1.12	18	20.39		0.000476848	5		4	707847	1	K.KALAAAGYDVEK.N	[65-76]	Not Used	Not Used
	P16402; P10412; P16403	Histone H1.3 OS=Homo sapiens OX=9606 GN=H1-3 PE=1 SV=2 Histone H1.4 OS=Homo sapiens OX=9606 GN=H1-4 PE=1 SV=2 Histone H1.2 OS=Homo sapiens OX=9606 GN=H1-2 PE=1 SV=2	ERSGVSLAALK	1	1	1130.65	565.83	0.62	13	26.33		0.00151892	3		3	1.05193e+06	1	K.ERSGVSLAALK.K	[54-64]	Not Used	Not Used
	P16402	Histone H1.3 OS=Homo sapiens OX=9606 GN=H1-3 PE=1 SV=2	KVAGAATPK	1	1	842.509	421.758	0.27	22	14.96		0.00352077	1		1	462828	1	K.KVAGAATPK.K	[141-149]	Used	Used
	P16402	Histone H1.3 OS=Homo sapiens OX=9606 GN=H1-3 PE=1 SV=2	VAGAATPKK	1	1	842.509	421.758	-0.46	24	25.5		0.00789841	1		1	395065408	1	K.VAGAATPKK.S	[142-150]	Used	Used
P06748	Nucleophosmin OS=Homo sapiens OX=9606 GN=NPM1 PE=1 SV=2	54	294	32.6	4.78	0	1696	1	17	17	115	3.57396e+08	23	0.0155953
	Master Protein Accessions	Master Protein Descriptions	Sequence	# PSMs	# Missed Cleavages	Theo. MH+ [Da]	m/z [Da] (by Search Engine): Mascot	DeltaM [ppm] (by Search Engine): Mascot	Ions Score (by Search Engine): Mascot	Top Apex RT [min]	Modifications	Qvality q-value	# Proteins		# Protein Groups	Abundance: F1763: n/a, Sample, n/a, n/a	Abundances Count: F1763: n/a, Sample, n/a, n/a	Sequence in Protein	Positions in Proteins	Quan Usage	Quan Ratio Usage
	P06748	Nucleophosmin OS=Homo sapiens OX=9606 GN=NPM1 PE=1 SV=2	MQASIEKGGSLPK	6	1	1345.71	673.361	-0.01	64	21.1		0.000156394	1		1	1.85193e+07	2	K.MQASIEKGGSLPK.V	[251-263]	Used	Used
	P06748	Nucleophosmin OS=Homo sapiens OX=9606 GN=NPM1 PE=1 SV=2	MQASIEKGGSLPKVEAK	7	2	1772.96	886.983	0.61	80	23.56		0.000156394	1		1	4.79449e+07	2	K.MQASIEKGGSLPKVEAK.F	[251-267]	Used	Used
	P06748	Nucleophosmin OS=Homo sapiens OX=9606 GN=NPM1 PE=1 SV=2	MQASIEKGGSLPKVEAK	2	2	1788.95	596.989	0.51	13	21.22	1xOxidation [M1]	0.000156394	1		1	3.13614e+06	1	K.MQASIEKGGSLPKVEAK.F	[251-267]	Used	Used
	P06748	Nucleophosmin OS=Homo sapiens OX=9606 GN=NPM1 PE=1 SV=2	MTDQEAIQDLWQWRK	4	1	1963.93	982.47	-0.59	63	46.03	1xOxidation [M1]	0.000156394	1		1	3293254	2	R.MTDQEAIQDLWQWRK.S	[278-292]	Used	Used
	P06748	Nucleophosmin OS=Homo sapiens OX=9606 GN=NPM1 PE=1 SV=2	MTDQEAIQDLWQWRK	7	1	1947.94	974.473	-0.19	48	49.2		0.000156394	1		1	52610122	2	R.MTDQEAIQDLWQWRK.S	[278-292]	Used	Used
	P06748	Nucleophosmin OS=Homo sapiens OX=9606 GN=NPM1 PE=1 SV=2	MTDQEAIQDLWQWR	2	0	1819.84	910.426	0.34	83	55.32		0.000156394	1		1	1.94817e+06	1	R.MTDQEAIQDLWQWR.K	[278-291]	Used	Used
	P06748	Nucleophosmin OS=Homo sapiens OX=9606 GN=NPM1 PE=1 SV=2	MSVQPTVSLGGFEITPPVVLR	3	0	2243.21	1122.11	-0.64	68	55.57	1xOxidation [M1]	0.000156394	1		1	631998	2	K.MSVQPTVSLGGFEITPPVVLR.L	[81-101]	Used	Used
	P06748	Nucleophosmin OS=Homo sapiens OX=9606 GN=NPM1 PE=1 SV=2	MSVQPTVSLGGFEITPPVVLR	4	0	2227.22	1114.11	-0.15	56	56.53		0.000156394	1		1	3.80388e+06	2	K.MSVQPTVSLGGFEITPPVVLR.L	[81-101]	Used	Used
	P06748	Nucleophosmin OS=Homo sapiens OX=9606 GN=NPM1 PE=1 SV=2	TVSLGAGAKDELHIVEAEAMNYEGSPIKVTLATLK	4	2	3671.92	1224.65	1.28	43	54.35	1xOxidation [M20]	0.000156394	1		1	1.89051e+06	2	R.TVSLGAGAKDELHIVEAEAMNYEGSPIKVTLATLK.M	[46-80]	Used	Used
	P06748	Nucleophosmin OS=Homo sapiens OX=9606 GN=NPM1 PE=1 SV=2	TVSLGAGAKDELHIVEAEAMNYEGSPIKVTLATLK	29	2	3655.93	1219.31	0.99	64	55.63		0.000156394	1		1	2.17023e+07	5	R.TVSLGAGAKDELHIVEAEAMNYEGSPIKVTLATLK.M	[46-80]	Used	Used
	P06748	Nucleophosmin OS=Homo sapiens OX=9606 GN=NPM1 PE=1 SV=2	TVSLGAGAKDELHIVEAEAMNYEGSPIK	2	1	2945.46	982.49	-0.2	41	47.37	1xOxidation [M20]	0.000156394	1		1	617763	1	R.TVSLGAGAKDELHIVEAEAMNYEGSPIK.V	[46-73]	Used	Used
	P06748	Nucleophosmin OS=Homo sapiens OX=9606 GN=NPM1 PE=1 SV=2	TVSLGAGAKDELHIVEAEAMNYEGSPIK	4	1	2929.46	733.121	0.74	43	49.65		0.000156394	1		1	9.3802e+06	2	R.TVSLGAGAKDELHIVEAEAMNYEGSPIK.V	[46-73]	Used	Used
	P06748	Nucleophosmin OS=Homo sapiens OX=9606 GN=NPM1 PE=1 SV=2	TPKGPSSVEDIKAK	10	2	1456.8	486.272	1.06	29	18.23		0.000156394	1		1	58595126	2	K.TPKGPSSVEDIKAK.M	[237-250]	Used	Used
	P06748	Nucleophosmin OS=Homo sapiens OX=9606 GN=NPM1 PE=1 SV=2	SAPGGGSKVPQKK	7	2	1240.7	620.854	-0.27	49	15.74		0.000156394	1		1	1.30716e+07	2	R.SAPGGGSKVPQKK.V	[143-155]	Used	Used
	P06748	Nucleophosmin OS=Homo sapiens OX=9606 GN=NPM1 PE=1 SV=2	SIRDTPAK	2	1	887.495	444.251	-0.58	31	15.23		0.000476848	1		1	49423100	1	K.SIRDTPAK.N	[195-202]	Used	Used
	P06748	Nucleophosmin OS=Homo sapiens OX=9606 GN=NPM1 PE=1 SV=2	SIRDTPAKNAQK	6	2	1328.73	664.868	-0.25	42	16.3		0.000476848	1		1	4.01418e+06	2	K.SIRDTPAKNAQK.S	[195-206]	Used	Used
	P06748	Nucleophosmin OS=Homo sapiens OX=9606 GN=NPM1 PE=1 SV=2	SAPGGGSKVPQK	2	1	1112.61	556.806	-0.44	38	15.02		0.000476848	1		1	7.54123e+06	1	R.SAPGGGSKVPQK.K	[143-154]	Used	Used
	P06748	Nucleophosmin OS=Homo sapiens OX=9606 GN=NPM1 PE=1 SV=2	VDNDENEHQLSLR	2	0	1568.73	784.869	0.32	70	21.22		0.000476848	1		1	1.11204e+06	1	K.VDNDENEHQLSLR.T	[33-45]	Used	Used
	P06748	Nucleophosmin OS=Homo sapiens OX=9606 GN=NPM1 PE=1 SV=2	FINYVKNCFR	2	1	1360.68	680.845	0.06	41	32.1	1xCarbamidomethyl [C8]	0.000476848	1		1	1.04651e+06	1	K.FINYVKNCFR.M	[268-277]	Used	Used
	P06748	Nucleophosmin OS=Homo sapiens OX=9606 GN=NPM1 PE=1 SV=2	GPSSVEDIKAK	3	1	1130.61	565.806	0.45	63	17.5		0.000476848	1		1	36835356	1	K.GPSSVEDIKAK.M	[240-250]	Used	Used
	P06748	Nucleophosmin OS=Homo sapiens OX=9606 GN=NPM1 PE=1 SV=2	MQASIEKGGSLPK	2	1	1361.71	681.359	1.14	35	18.68	1xOxidation [M1]	0.000476848	1		1	1.02675e+06	1	K.MQASIEKGGSLPK.V	[251-263]	Used	Used
	P06748	Nucleophosmin OS=Homo sapiens OX=9606 GN=NPM1 PE=1 SV=2	LLSISGKR	2	1	873.552	437.279	-0.44	29	21.06		0.00251508	1		1	3627421	1	K.LLSISGKR.S	[135-142]	Used	Used
	P06748	Nucleophosmin OS=Homo sapiens OX=9606 GN=NPM1 PE=1 SV=2	GGSLPKVEAK	3	1	985.568	493.288	0.34	16	18.05		0.00546604	1		1	15624334	1	K.GGSLPKVEAK.F	[258-267]	Used	Used
P19338	Nucleolin OS=Homo sapiens OX=9606 GN=NCL PE=1 SV=3	37	710	76.6	4.7	0	1952	1	28	28	105	3.00954e+08	26	0.0142392
	Master Protein Accessions	Master Protein Descriptions	Sequence	# PSMs	# Missed Cleavages	Theo. MH+ [Da]	m/z [Da] (by Search Engine): Mascot	DeltaM [ppm] (by Search Engine): Mascot	Ions Score (by Search Engine): Mascot	Top Apex RT [min]	Modifications	Qvality q-value	# Proteins		# Protein Groups	Abundance: F1763: n/a, Sample, n/a, n/a	Abundances Count: F1763: n/a, Sample, n/a, n/a	Sequence in Protein	Positions in Proteins	Quan Usage	Quan Ratio Usage
	P19338	Nucleolin OS=Homo sapiens OX=9606 GN=NCL PE=1 SV=3	IVTDRETGSSK	3	1	1192.62	596.812	0.24	55	15.15		0.000156394	1		1	19684534	1	R.IVTDRETGSSK.G	[600-610]	Used	Used
	P19338	Nucleolin OS=Homo sapiens OX=9606 GN=NCL PE=1 SV=3	NLPYKVTQDELKEVFEDAAEIR	10	2	2607.33	869.782	0.31	35	54.82		0.000156394	1		1	1.68186e+07	2	K.NLPYKVTQDELKEVFEDAAEIR.L	[399-420]	Used	Used
	P19338	Nucleolin OS=Homo sapiens OX=9606 GN=NCL PE=1 SV=3	NDLAVVDVR	1	0	1000.54	500.775	-0.15	38	28.64		0.000156394	1		1	957348	1	K.NDLAVVDVR.I	[334-342]	Used	Used
	P19338	Nucleolin OS=Homo sapiens OX=9606 GN=NCL PE=1 SV=3	KFGYVDFESAEDLEKALELTGLK	2	2	2602.33	868.115	0.63	41	57.64		0.000156394	1		1	1.38362e+06	1	R.KFGYVDFESAEDLEKALELTGLK.V	[348-370]	Used	Used
	P19338	Nucleolin OS=Homo sapiens OX=9606 GN=NCL PE=1 SV=3	KFGYVDFESAEDLEK	1	1	1776.83	888.92	-0.27	58	39.89		0.000156394	1		1	642057	1	R.KFGYVDFESAEDLEK.A	[348-362]	Used	Used
	P19338	Nucleolin OS=Homo sapiens OX=9606 GN=NCL PE=1 SV=3	KQKVEGTEPTTAFNLFVGNLNFNK	10	2	2696.4	899.473	0.39	43	53.33		0.000156394	1		1	11766095	2	K.KQKVEGTEPTTAFNLFVGNLNFNK.S	[295-318]	Used	Used
	P19338	Nucleolin OS=Homo sapiens OX=9606 GN=NCL PE=1 SV=3	TGISDVFAKNDLAVVDVR	4	1	1919.02	960.015	-0.53	99	45.8		0.000156394	1		1	6.5114e+06	2	K.TGISDVFAKNDLAVVDVR.I	[325-342]	Used	Used
	P19338	Nucleolin OS=Homo sapiens OX=9606 GN=NCL PE=1 SV=3	TLVLSNLSYSATEETLQEVFEK	4	0	2501.27	834.427	0.39	52			0.000156394	1		1			K.TLVLSNLSYSATEETLQEVFEK.A	[487-508]	Not Used	Not Used
	P19338	Nucleolin OS=Homo sapiens OX=9606 GN=NCL PE=1 SV=3	TLFVKGLSEDTTEETLKESFDGSVR	2	2	2788.39	930.135	0.1	50	44.99		0.000156394	1		1	1.59515e+06	1	K.TLFVKGLSEDTTEETLKESFDGSVR.A	[573-597]	Used	Used
	P19338	Nucleolin OS=Homo sapiens OX=9606 GN=NCL PE=1 SV=3	VTQDELKEVFEDAAEIR	4	1	1991.99	996.499	-0.52	65	50.61		0.000156394	1		1	2.04326e+06	2	K.VTQDELKEVFEDAAEIR.L	[404-420]	Used	Used
	P19338	Nucleolin OS=Homo sapiens OX=9606 GN=NCL PE=1 SV=3	SAPELKTGISDVFAKNDLAVVDVR	7	2	2544.37	848.794	-0.05	57	45.87		0.000156394	1		1	17804204	2	K.SAPELKTGISDVFAKNDLAVVDVR.I	[319-342]	Used	Used
	P19338	Nucleolin OS=Homo sapiens OX=9606 GN=NCL PE=1 SV=3	SAPELKTGISDVFAK	2	1	1562.84	781.925	-0.03	52	36.87		0.000156394	1		1	1497257	1	K.SAPELKTGISDVFAK.N	[319-333]	Used	Used
	P19338	Nucleolin OS=Homo sapiens OX=9606 GN=NCL PE=1 SV=3	QKVEGTEPTTAFNLFVGNLNFNK	6	1	2568.31	856.775	0.35	46	55.38		0.000156394	1		1	5.15336e+06	2	K.QKVEGTEPTTAFNLFVGNLNFNK.S	[296-318]	Used	Used
	P19338	Nucleolin OS=Homo sapiens OX=9606 GN=NCL PE=1 SV=3	SISLYYTGEKGQNQDYRGGK	6	2	2264.09	755.37	-0.08	15	26.06		0.000156394	1		1	13133780	1	R.SISLYYTGEKGQNQDYRGGK.N	[458-477]	Used	Used
	P19338	Nucleolin OS=Homo sapiens OX=9606 GN=NCL PE=1 SV=3	AIRLELQGPR	6	1	1152.68	576.847	1.13	43	29.83		0.000156394	1		1	36387668	1	R.AIRLELQGPR.G	[552-561]	Used	Used
	P19338	Nucleolin OS=Homo sapiens OX=9606 GN=NCL PE=1 SV=3	FGYVDFESAEDLEKALELTGLK	2	1	2474.23	1237.62	0.63	90			0.000156394	1		1			K.FGYVDFESAEDLEKALELTGLK.V	[349-370]	Not Used	Not Used
	P19338	Nucleolin OS=Homo sapiens OX=9606 GN=NCL PE=1 SV=3	GFGFVDFNSEEDAK	2	0	1561.68	781.344	0.36	32	43.5		0.000156394	1		1	343207	1	K.GFGFVDFNSEEDAK.A	[611-624]	Used	Used
	P19338	Nucleolin OS=Homo sapiens OX=9606 GN=NCL PE=1 SV=3	EAMEDGEIDGNKVTLDWAKPK	3	1	2346.13	782.714	-0.13	56	35.81		0.000156394	1		1	3.55761e+06	1	K.EAMEDGEIDGNKVTLDWAKPK.G	[628-648]	Used	Used
	P19338	Nucleolin OS=Homo sapiens OX=9606 GN=NCL PE=1 SV=3	GLSEDTTEETLKESFDGSVR	4	1	2200.03	1100.52	-0.87	71	38.21		0.000156394	1		1	1.44094e+07	2	K.GLSEDTTEETLKESFDGSVR.A	[578-597]	Used	Used
	P19338	Nucleolin OS=Homo sapiens OX=9606 GN=NCL PE=1 SV=3	SISLYYTGEKGQNQDYR	3	1	2021.96	1011.48	0.57	32	28.83		0.000476848	1		1	1.05061e+06	2	R.SISLYYTGEKGQNQDYR.G	[458-474]	Used	Used
	P19338	Nucleolin OS=Homo sapiens OX=9606 GN=NCL PE=1 SV=3	SISLYYTGEK	2	0	1160.58	580.796	0.49	19	30.94		0.000476848	1		1	1.11886e+06	1	R.SISLYYTGEK.G	[458-467]	Used	Used
	P19338	Nucleolin OS=Homo sapiens OX=9606 GN=NCL PE=1 SV=3	AVTTPGKKGATPGK	4	2	1312.76	656.882	-0.99	36	15.73		0.000476848	1		1	2.86849e+06	1	K.AVTTPGKKGATPGK.A	[103-116]	Used	Used
	P19338	Nucleolin OS=Homo sapiens OX=9606 GN=NCL PE=1 SV=3	KVAVATPAKK	2	2	1012.65	506.829	0.04	33	15.9		0.000476848	1		1	6083359	1	K.KVAVATPAKK.A	[71-80]	Used	Used
	P19338	Nucleolin OS=Homo sapiens OX=9606 GN=NCL PE=1 SV=3	KVVVSPTKK	6	2	985.64	493.324	0.04	17	16.06		0.000476848	1		1	30302914	1	K.KVVVSPTKK.V	[63-71]	Used	Used
	P19338	Nucleolin OS=Homo sapiens OX=9606 GN=NCL PE=1 SV=3	VVVSPTKK	2	1	857.545	429.276	-0.18	25	15.46		0.00117376	1		1	13595770	1	K.VVVSPTKK.V	[64-71]	Used	Used
	P19338	Nucleolin OS=Homo sapiens OX=9606 GN=NCL PE=1 SV=3	VAVATPAKK	2	1	884.556	442.781	-0.82	26	15.53		0.00251508	1		1	34366224	1	K.VAVATPAKK.A	[72-80]	Used	Used
	P19338	Nucleolin OS=Homo sapiens OX=9606 GN=NCL PE=1 SV=3	ALVATPGKK	2	1	884.556	442.782	-0.37	27	16.84		0.00319724	1		1	38650336	1	K.ALVATPGKK.G	[117-125]	Used	Used
	P19338	Nucleolin OS=Homo sapiens OX=9606 GN=NCL PE=1 SV=3	SQPSKTLFVK	3	1	1134.65	567.83	0	3	22.38		0.00729466	1		1	19228614	1	R.SQPSKTLFVK.G	[568-577]	Used	Used
P22626	Heterogeneous nuclear ribonucleoproteins A2/B1 OS=Homo sapiens OX=9606 GN=HNRNPA2B1 PE=1 SV=2	46	353	37.4	8.95	0	1036	1	17	17	75	2.63385e+08	18	0.0101709
	Master Protein Accessions	Master Protein Descriptions	Sequence	# PSMs	# Missed Cleavages	Theo. MH+ [Da]	m/z [Da] (by Search Engine): Mascot	DeltaM [ppm] (by Search Engine): Mascot	Ions Score (by Search Engine): Mascot	Top Apex RT [min]	Modifications	Qvality q-value	# Proteins		# Protein Groups	Abundance: F1763: n/a, Sample, n/a, n/a	Abundances Count: F1763: n/a, Sample, n/a, n/a	Sequence in Protein	Positions in Proteins	Quan Usage	Quan Ratio Usage
	P22626	Heterogeneous nuclear ribonucleoproteins A2/B1 OS=Homo sapiens OX=9606 GN=HNRNPA2B1 PE=1 SV=2	LTDCVVMRDPASKR	6	2	1647.83	549.948	-0.08	29	21.98	1xCarbamidomethyl [C4]	0.000156394	1		1	16187053	1	K.LTDCVVMRDPASKR.S	[47-60]	Used	Used
	P22626	Heterogeneous nuclear ribonucleoproteins A2/B1 OS=Homo sapiens OX=9606 GN=HNRNPA2B1 PE=1 SV=2	NMGGPYGGGNYGPGGSGGSGGYGGR	3	0	2189.91	1095.46	-0.23	92	24.68		0.000156394	1		1	4.89123e+06	2	R.NMGGPYGGGNYGPGGSGGSGGYGGR.S	[326-350]	Used	Used
	P22626	Heterogeneous nuclear ribonucleoproteins A2/B1 OS=Homo sapiens OX=9606 GN=HNRNPA2B1 PE=1 SV=2	SGRGGNFGFGDSRGGGGNFGPGPGSNFR	2	2	2672.21	891.409	0.72	17	32.74		0.000156394	1		1	2.00442e+06	2	R.SGRGGNFGFGDSRGGGGNFGPGPGSNFR.G	[201-228]	Used	Used
	P22626	Heterogeneous nuclear ribonucleoproteins A2/B1 OS=Homo sapiens OX=9606 GN=HNRNPA2B1 PE=1 SV=2	ALSRQEMQEVQSSR	6	1	1648.81	550.274	0.56	61	20.04		0.000156394	1		1	46013916	2	K.ALSRQEMQEVQSSR.S	[187-200]	Used	Used
	P22626	Heterogeneous nuclear ribonucleoproteins A2/B1 OS=Homo sapiens OX=9606 GN=HNRNPA2B1 PE=1 SV=2	GFGFVTFSSMAEVDAAMAARPHSIDGR	3	0	2827.33	707.586	-1.76	24	54.49		0.000156394	1		1	1.27366e+06	2	R.GFGFVTFSSMAEVDAAMAARPHSIDGR.V	[63-89]	Used	Used
	P22626	Heterogeneous nuclear ribonucleoproteins A2/B1 OS=Homo sapiens OX=9606 GN=HNRNPA2B1 PE=1 SV=2	GFGFVTFDDHDPVDKIVLQK	8	1	2277.16	1139.08	-0.44	52	48.34		0.000156394	1		1	7.57413e+07	2	R.GFGFVTFDDHDPVDKIVLQK.Y	[154-173]	Used	Used
	P22626	Heterogeneous nuclear ribonucleoproteins A2/B1 OS=Homo sapiens OX=9606 GN=HNRNPA2B1 PE=1 SV=2	GFGFVTFDDHDPVDK	3	0	1695.76	848.387	0.51	58	42.5		0.000156394	1		1	971316	2	R.GFGFVTFDDHDPVDK.I	[154-168]	Used	Used
	P22626	Heterogeneous nuclear ribonucleoproteins A2/B1 OS=Homo sapiens OX=9606 GN=HNRNPA2B1 PE=1 SV=2	GGNFGFGDSRGGGGNFGPGPGSNFR	2	1	2372.06	791.357	0.76	59	35.81		0.000156394	1		1	4685251	1	R.GGNFGFGDSRGGGGNFGPGPGSNFR.G	[204-228]	Used	Used
	P22626	Heterogeneous nuclear ribonucleoproteins A2/B1 OS=Homo sapiens OX=9606 GN=HNRNPA2B1 PE=1 SV=2	GGGGNFGPGPGSNFRGGSDGYGSGR	6	1	2270.99	757.669	0.31	42	24.81		0.000156394	1		1	31447738	2	R.GGGGNFGPGPGSNFRGGSDGYGSGR.G	[214-238]	Used	Used
	P22626	Heterogeneous nuclear ribonucleoproteins A2/B1 OS=Homo sapiens OX=9606 GN=HNRNPA2B1 PE=1 SV=2	KALSRQEMQEVQSSR	10	2	1776.9	592.972	-0.11	26	18.92		0.000156394	1		1	1.8045e+07	3	R.KALSRQEMQEVQSSR.S	[186-200]	Used	Used
	P22626	Heterogeneous nuclear ribonucleoproteins A2/B1 OS=Homo sapiens OX=9606 GN=HNRNPA2B1 PE=1 SV=2	SGRGGNFGFGDSR	8	1	1313.6	657.303	-0.15	24	23.1		0.000476848	1		1	21985348	2	R.SGRGGNFGFGDSR.G	[201-213]	Used	Used
	P22626	Heterogeneous nuclear ribonucleoproteins A2/B1 OS=Homo sapiens OX=9606 GN=HNRNPA2B1 PE=1 SV=2	TLETVPLER	2	0	1057.59	529.298	0.29	29	27.68		0.000476848	1		1	5054237	1	K.TLETVPLER.K	[4-12]	Used	Used
	P22626	Heterogeneous nuclear ribonucleoproteins A2/B1 OS=Homo sapiens OX=9606 GN=HNRNPA2B1 PE=1 SV=2	ALSRQEMQEVQSSR	1	1	1664.8	555.606	0.44	13	16.44	1xOxidation [M7]	0.000476848	1		1	1.05989e+06	1	K.ALSRQEMQEVQSSR.S	[187-200]	Used	Used
	P22626	Heterogeneous nuclear ribonucleoproteins A2/B1 OS=Homo sapiens OX=9606 GN=HNRNPA2B1 PE=1 SV=2	GGGGNFGPGPGSNFR	2	0	1377.63	689.318	-0.07	26	25.76		0.000476848	1		1	6.07622e+06	1	R.GGGGNFGPGPGSNFR.G	[214-228]	Used	Used
	P22626	Heterogeneous nuclear ribonucleoproteins A2/B1 OS=Homo sapiens OX=9606 GN=HNRNPA2B1 PE=1 SV=2	GGNFGFGDSR	2	0	1013.44	507.226	0.28	57	26.07		0.000476848	1		1	11902689	1	R.GGNFGFGDSR.G	[204-213]	Used	Used
	P22626	Heterogeneous nuclear ribonucleoproteins A2/B1 OS=Homo sapiens OX=9606 GN=HNRNPA2B1 PE=1 SV=2	EESGKPGAHVTVK	5	0	1338.7	669.853	-1.23	38	16.22		0.000476848	1		1	4.56927e+06	1	R.EESGKPGAHVTVK.K	[100-112]	Used	Used
	P22626	Heterogeneous nuclear ribonucleoproteins A2/B1 OS=Homo sapiens OX=9606 GN=HNRNPA2B1 PE=1 SV=2	QEMQEVQSSR	2	0	1221.55	611.28	-0.5	43	16.45		0.000476848	1		1	4268506	1	R.QEMQEVQSSR.S	[191-200]	Used	Used
	P22626	Heterogeneous nuclear ribonucleoproteins A2/B1 OS=Homo sapiens OX=9606 GN=HNRNPA2B1 PE=1 SV=2	GGNFGFGDSRGGGGNFGPGPGSNFRGGSDGYGSGR	4	2	3265.42	1089.14	-0.24	18	33.26		0.00117376	1		1	7208113	2	R.GGNFGFGDSRGGGGNFGPGPGSNFRGGSDGYGSGR.G	[204-238]	Used	Used
P62937	Peptidyl-prolyl cis-trans isomerase A OS=Homo sapiens OX=9606 GN=PPIA PE=1 SV=2	78	165	18	7.81	0	1243	1	11	11	61	2.2352e+08	13	0.00827231
	Master Protein Accessions	Master Protein Descriptions	Sequence	# PSMs	# Missed Cleavages	Theo. MH+ [Da]	m/z [Da] (by Search Engine): Mascot	DeltaM [ppm] (by Search Engine): Mascot	Ions Score (by Search Engine): Mascot	Top Apex RT [min]	Modifications	Qvality q-value	# Proteins		# Protein Groups	Abundance: F1763: n/a, Sample, n/a, n/a	Abundances Count: F1763: n/a, Sample, n/a, n/a	Sequence in Protein	Positions in Proteins	Quan Usage	Quan Ratio Usage
	P62937	Peptidyl-prolyl cis-trans isomerase A OS=Homo sapiens OX=9606 GN=PPIA PE=1 SV=2	KITIADCGQLE	1	1	1247.63	624.319	0.34	71	28.25	1xCarbamidomethyl [C7]	0.000156394	1		1	12737578	1	K.KITIADCGQLE.-	[155-165]	Used	Used
	P62937	Peptidyl-prolyl cis-trans isomerase A OS=Homo sapiens OX=9606 GN=PPIA PE=1 SV=2	IIPGFMCQGGDFTR	2	0	1598.75	799.877	0.25	44	41.73	1xCarbamidomethyl [C7]	0.000156394	2		1	6879280	1	R.IIPGFMCQGGDFTR.H	[56-69]	Used	Used
	P62937	Peptidyl-prolyl cis-trans isomerase A OS=Homo sapiens OX=9606 GN=PPIA PE=1 SV=2	TEWLDGKHVVFGK	17	1	1515.8	505.937	-0.07	33	33.63		0.000156394	1		1	6.19879e+07	3	K.TEWLDGKHVVFGK.V	[119-131]	Used	Used
	P62937	Peptidyl-prolyl cis-trans isomerase A OS=Homo sapiens OX=9606 GN=PPIA PE=1 SV=2	VKEGMNIVEAMER	6	1	1521.74	761.374	0.25	43	29.53	1xOxidation [M]	0.000156394	1		1	4.40751e+06	3	K.VKEGMNIVEAMER.F	[132-144]	Used	Used
	P62937	Peptidyl-prolyl cis-trans isomerase A OS=Homo sapiens OX=9606 GN=PPIA PE=1 SV=2	VKEGMNIVEAMER	9	1	1505.75	753.376	-0.05	69	36.2		0.000156394	1		1	60251368	2	K.VKEGMNIVEAMER.F	[132-144]	Used	Used
	P62937	Peptidyl-prolyl cis-trans isomerase A OS=Homo sapiens OX=9606 GN=PPIA PE=1 SV=2	VSFELFADKVPKTAENFR	2	2	2098.1	700.037	0.42	44	43.87		0.000156394	1		1	1.85835e+06	1	R.VSFELFADKVPKTAENFR.A	[20-37]	Used	Used
	P62937	Peptidyl-prolyl cis-trans isomerase A OS=Homo sapiens OX=9606 GN=PPIA PE=1 SV=2	VSFELFADKVPK	8	1	1379.76	690.382	0.12	48	43.08		0.000156394	1		1	5.91336e+07	2	R.VSFELFADKVPK.T	[20-31]	Used	Used
	P62937	Peptidyl-prolyl cis-trans isomerase A OS=Homo sapiens OX=9606 GN=PPIA PE=1 SV=2	VNPTVFFDIAVDGEPLGR	4	0	1946	973.506	1.76	86	57.39		0.000156394	1		1	1.98242e+06	2	M.VNPTVFFDIAVDGEPLGR.V	[2-19]	Used	Used
	P62937	Peptidyl-prolyl cis-trans isomerase A OS=Homo sapiens OX=9606 GN=PPIA PE=1 SV=2	SIYGEKFEDENFILK	6	1	1831.91	916.46	0.39	57	41.93		0.000156394	1		1	11484262	1	K.SIYGEKFEDENFILK.H	[77-91]	Used	Used
	P62937	Peptidyl-prolyl cis-trans isomerase A OS=Homo sapiens OX=9606 GN=PPIA PE=1 SV=2	HTGPGILSMANAGPNTNGSQFFICTAK	2	0	2791.33	931.114	-0.9	46	45.57	1xCarbamidomethyl [C24]	0.000156394	1		1	361726	1	K.HTGPGILSMANAGPNTNGSQFFICTAK.T	[92-118]	Used	Used
	P62937	Peptidyl-prolyl cis-trans isomerase A OS=Homo sapiens OX=9606 GN=PPIA PE=1 SV=2	VKEGMNIVEAMER	1	1	1537.73	769.371	0.3	10	18.77	2xOxidation [M5; M11]	0.000476848	1		1	227208	1	K.VKEGMNIVEAMER.F	[132-144]	Used	Used
	P62937	Peptidyl-prolyl cis-trans isomerase A OS=Homo sapiens OX=9606 GN=PPIA PE=1 SV=2	EGMNIVEAMER	2	0	1278.58	639.794	-0.09	40	40.8		0.000476848	1		1	1943728	1	K.EGMNIVEAMER.F	[134-144]	Used	Used
	P62937	Peptidyl-prolyl cis-trans isomerase A OS=Homo sapiens OX=9606 GN=PPIA PE=1 SV=2	FEDENFILK	1	0	1154.57	577.79	0.23	14	38.45		0.00516978	1		1	265339	1	K.FEDENFILK.H	[83-91]	Used	Used
P62917	60S ribosomal protein L8 OS=Homo sapiens OX=9606 GN=RPL8 PE=1 SV=2	39	257	28	11.03	0	755	1	11	11	73	1.9501e+08	9	0.00989965
	Master Protein Accessions	Master Protein Descriptions	Sequence	# PSMs	# Missed Cleavages	Theo. MH+ [Da]	m/z [Da] (by Search Engine): Mascot	DeltaM [ppm] (by Search Engine): Mascot	Ions Score (by Search Engine): Mascot	Top Apex RT [min]	Modifications	Qvality q-value	# Proteins		# Protein Groups	Abundance: F1763: n/a, Sample, n/a, n/a	Abundances Count: F1763: n/a, Sample, n/a, n/a	Sequence in Protein	Positions in Proteins	Quan Usage	Quan Ratio Usage
	P62917	60S ribosomal protein L8 OS=Homo sapiens OX=9606 GN=RPL8 PE=1 SV=2	KAQLNIGNVLPVGTMPEGTIVCCLEEKPGDRGK	2	2	3580.83	1194.28	-0.52	28	49.13	2xCarbamidomethyl [C22; C23]	0.000156394	1		1	1.14845e+06	1	K.KAQLNIGNVLPVGTMPEGTIVCCLEEKPGDRGK.L	[93-125]	Used	Used
	P62917	60S ribosomal protein L8 OS=Homo sapiens OX=9606 GN=RPL8 PE=1 SV=2	KAQLNIGNVLPVGTMPEGTIVCCLEEKPGDR	2	1	3395.71	1132.58	1.17	54		2xCarbamidomethyl [C22; C23]	0.000156394	1		1			K.KAQLNIGNVLPVGTMPEGTIVCCLEEKPGDR.G	[93-123]	Not Used	Not Used
	P62917	60S ribosomal protein L8 OS=Homo sapiens OX=9606 GN=RPL8 PE=1 SV=2	ASGNYATVISHNPETK	6	0	1688.82	844.916	0.82	83	22.64		0.000156394	1		1	17280813	2	R.ASGNYATVISHNPETK.K	[129-144]	Used	Used
	P62917	60S ribosomal protein L8 OS=Homo sapiens OX=9606 GN=RPL8 PE=1 SV=2	ASGNYATVISHNPETKK	11	1	1816.92	908.963	-0.09	63	20.55		0.000156394	1		1	4.88931e+07	3	R.ASGNYATVISHNPETKK.T	[129-145]	Used	Used
	P62917	60S ribosomal protein L8 OS=Homo sapiens OX=9606 GN=RPL8 PE=1 SV=2	AQLNIGNVLPVGTMPEGTIVCCLEEKPGDRGK	4	1	3452.73	1151.58	-0.12	42	51.98	2xCarbamidomethyl [C21; C22]	0.000156394	1		1	2036309	2	K.AQLNIGNVLPVGTMPEGTIVCCLEEKPGDRGK.L	[94-125]	Used	Used
	P62917	60S ribosomal protein L8 OS=Homo sapiens OX=9606 GN=RPL8 PE=1 SV=2	AVVGVVAGGGR	2	0	941.553	471.28	0.37	49	20.7		0.000156394	1		1	7.50961e+06	1	R.AVVGVVAGGGR.I	[164-174]	Used	Used
	P62917	60S ribosomal protein L8 OS=Homo sapiens OX=9606 GN=RPL8 PE=1 SV=2	AVVGVVAGGGRIDKPILK	38	1	1749.07	875.041	-0.05	46	29.73		0.000156394	1		1	7.05963e+07	7	R.AVVGVVAGGGRIDKPILK.A	[164-181]	Used	Used
	P62917	60S ribosomal protein L8 OS=Homo sapiens OX=9606 GN=RPL8 PE=1 SV=2	LRAVDFAER	2	1	1076.58	538.796	0.15	31	25.08		0.000476848	1		1	5427369	1	R.LRAVDFAER.H	[29-37]	Used	Used
	P62917	60S ribosomal protein L8 OS=Homo sapiens OX=9606 GN=RPL8 PE=1 SV=2	KVISSANR	2	1	874.51	437.759	0.39	19			0.000476848	1		1			K.KVISSANR.A	[156-163]	Not Used	Not Used
	P62917	60S ribosomal protein L8 OS=Homo sapiens OX=9606 GN=RPL8 PE=1 SV=2	VKLPSGSKK	2	2	943.593	472.3	-0.31	19	17.41		0.00251508	1		1	23313430	1	R.VKLPSGSKK.V	[148-156]	Used	Used
	P62917	60S ribosomal protein L8 OS=Homo sapiens OX=9606 GN=RPL8 PE=1 SV=2	VGLIAARR	2	1	855.552	428.28	-0.36	23	19.78		0.00603704	1		1	18804380	1	K.VGLIAARR.T	[235-242]	Used	Used
P35579	Myosin-9 OS=Homo sapiens OX=9606 GN=MYH9 PE=1 SV=4	38	1960	226.4	5.6	0	3799	1	72	76	180	1.91105e+08	61	0.0244101
	Master Protein Accessions	Master Protein Descriptions	Sequence	# PSMs	# Missed Cleavages	Theo. MH+ [Da]	m/z [Da] (by Search Engine): Mascot	DeltaM [ppm] (by Search Engine): Mascot	Ions Score (by Search Engine): Mascot	Top Apex RT [min]	Modifications	Qvality q-value	# Proteins		# Protein Groups	Abundance: F1763: n/a, Sample, n/a, n/a	Abundances Count: F1763: n/a, Sample, n/a, n/a	Sequence in Protein	Positions in Proteins	Quan Usage	Quan Ratio Usage
	P35579	Myosin-9 OS=Homo sapiens OX=9606 GN=MYH9 PE=1 SV=4	LQQELDDLLVDLDHQRQSACNLEK	2	1	2880.42	960.809	-0.97	42	50.62	1xCarbamidomethyl [C20]	0.000156394	1		1	710120	1	R.LQQELDDLLVDLDHQRQSACNLEK.K	[1418-1441]	Used	Used
	P35579	Myosin-9 OS=Homo sapiens OX=9606 GN=MYH9 PE=1 SV=4	LQQELDDLLVDLDHQR	4	0	1949.99	650.669	-0.48	35	52.44		0.000156394	1		1	2.46009e+06	2	R.LQQELDDLLVDLDHQR.Q	[1418-1433]	Used	Used
	P35579	Myosin-9 OS=Homo sapiens OX=9606 GN=MYH9 PE=1 SV=4	LTKDFSALESQLQDTQELLQEENRQK	3	2	3091.55	1031.19	-0.53	53	49.42		0.000156394	1		1	2.47072e+06	2	K.LTKDFSALESQLQDTQELLQEENRQK.L	[1299-1324]	Used	Used
	P35579	Myosin-9 OS=Homo sapiens OX=9606 GN=MYH9 PE=1 SV=4	LTKDFSALESQLQDTQELLQEENR	1	1	2835.4	945.806	0.5	30	51.76		0.000156394	1		1	189401	1	K.LTKDFSALESQLQDTQELLQEENR.Q	[1299-1322]	Used	Used
	P35579	Myosin-9 OS=Homo sapiens OX=9606 GN=MYH9 PE=1 SV=4	NTDQASMPDNTAAQKVSHLLGINVTDFTR	2	1	3144.54	1048.85	-0.12	32			0.000156394	1		1			R.NTDQASMPDNTAAQKVSHLLGINVTDFTR.G	[359-387]	Not Used	Not Used
	P35579	Myosin-9 OS=Homo sapiens OX=9606 GN=MYH9 PE=1 SV=4	NTDQASMPDNTAAQK	1	0	1591.7	796.355	0.73	33			0.000156394	2		1			R.NTDQASMPDNTAAQK.V	[359-373]	Not Used	Not Used
	P35579	Myosin-9 OS=Homo sapiens OX=9606 GN=MYH9 PE=1 SV=4	QAQQERDELADEIANSSGK	3	1	2088.98	696.997	-0.7	33	27.68		0.000156394	1		1	1957959	2	R.QAQQERDELADEIANSSGK.G	[1698-1716]	Used	Used
	P35579	Myosin-9 OS=Homo sapiens OX=9606 GN=MYH9 PE=1 SV=4	MQQNIQELEEQLEEEESARQKLQLEK	4	2	3200.57	800.899	0.46	37	43.19		0.000156394	1		1	2.40775e+06	2	K.MQQNIQELEEQLEEEESARQKLQLEK.V	[941-966]	Used	Used
	P35579	Myosin-9 OS=Homo sapiens OX=9606 GN=MYH9 PE=1 SV=4	KVEAQLQELQVK	2	1	1412.81	706.909	0.5	44	27.67		0.000156394	1		1	599648	1	K.KVEAQLQELQVK.F	[1249-1260]	Used	Used
	P35579	Myosin-9 OS=Homo sapiens OX=9606 GN=MYH9 PE=1 SV=4	IAQLEEQLDNETKERQAACK	2	2	2374.17	792.06	-0.61	20	27.44	1xCarbamidomethyl [C19]	0.000156394	1		1	859813	1	K.IAQLEEQLDNETKERQAACK.Q	[1816-1835]	Used	Used
	P35579	Myosin-9 OS=Homo sapiens OX=9606 GN=MYH9 PE=1 SV=4	IAQLEEQLDNETKER	2	1	1815.91	908.458	0.06	71	29.47		0.000156394	1		1	2038535	1	K.IAQLEEQLDNETKER.Q	[1816-1830]	Used	Used
	P35579	Myosin-9 OS=Homo sapiens OX=9606 GN=MYH9 PE=1 SV=4	IAQLEEELEEEQGNTELINDRLKK	4	2	2841.45	947.821	0.15	73	41.21		0.000156394	1		1	8.02961e+06	2	R.IAQLEEELEEEQGNTELINDRLKK.A	[1731-1754]	Used	Used
	P35579	Myosin-9 OS=Homo sapiens OX=9606 GN=MYH9 PE=1 SV=4	IAQLEEELEEEQGNTELINDRLK	3	1	2713.35	905.121	-1.11	52	44.25		0.000156394	1		1	1.94919e+06	1	R.IAQLEEELEEEQGNTELINDRLK.K	[1731-1753]	Used	Used
	P35579	Myosin-9 OS=Homo sapiens OX=9606 GN=MYH9 PE=1 SV=4	IAEFTTNLTEEEEKSKSLAK	4	2	2268.16	756.725	0.34	45	32.47		0.000156394	1		1	2.91491e+06	2	R.IAEFTTNLTEEEEKSKSLAK.L	[1001-1020]	Used	Used
	P35579	Myosin-9 OS=Homo sapiens OX=9606 GN=MYH9 PE=1 SV=4	IAEFTTNLTEEEEKSK	4	1	1868.91	934.96	0.2	100	30.08		0.000156394	1		1	1.37168e+06	2	R.IAEFTTNLTEEEEKSK.S	[1001-1016]	Used	Used
	P35579	Myosin-9 OS=Homo sapiens OX=9606 GN=MYH9 PE=1 SV=4	KGAGDGSDEEVDGKADGAEAKPAE	2	2	2303.03	768.347	-0.49	57	16.37		0.000156394	1		1	1.84025e+06	1	R.KGAGDGSDEEVDGKADGAEAKPAE.-	[1937-1960]	Used	Used
	P35579	Myosin-9 OS=Homo sapiens OX=9606 GN=MYH9 PE=1 SV=4	KFDQLLAEEKTISAK	5	2	1720.95	860.978	0.45	71	32.55		0.000156394	1		1	7.11313e+06	2	K.KFDQLLAEEKTISAK.Y	[1445-1459]	Used	Used
	P35580; P35579; Q7Z406	Myosin-10 OS=Homo sapiens OX=9606 GN=MYH10 PE=1 SV=3 Myosin-9 OS=Homo sapiens OX=9606 GN=MYH9 PE=1 SV=4 Myosin-14 OS=Homo sapiens OX=9606 GN=MYH14 PE=1 SV=2	KFDQLLAEEK	2	1	1220.65	610.83	0.19	51	27.72		0.000156394	4		3	5.6351e+06	1	K.KFDQLLAEEK.T	[1445-1454]	Not Used	Not Used
	P35579	Myosin-9 OS=Homo sapiens OX=9606 GN=MYH9 PE=1 SV=4	KMQQNIQELEEQLEEEESARQK	3	2	2717.3	906.439	-0.38	41	40.47		0.000156394	1		1	1.41248e+06	2	K.KMQQNIQELEEQLEEEESARQK.L	[940-961]	Used	Used
	P35579	Myosin-9 OS=Homo sapiens OX=9606 GN=MYH9 PE=1 SV=4	KMQQNIQELEEQLEEEESAR	2	1	2461.15	1231.08	-0.52	26			0.000156394	1		1			K.KMQQNIQELEEQLEEEESAR.Q	[940-959]	Not Used	Not Used
	P35579	Myosin-9 OS=Homo sapiens OX=9606 GN=MYH9 PE=1 SV=4	KMEDSVGCLETAEEVKR	3	2	1980.94	990.971	-0.59	45	26.11	1xCarbamidomethyl [C8]	0.000156394	1		1	3.21619e+06	2	K.KMEDSVGCLETAEEVKR.K	[1372-1388]	Used	Used
	P35579	Myosin-9 OS=Homo sapiens OX=9606 GN=MYH9 PE=1 SV=4	KLEEEQIILEDQNCKLAK	2	2	2201.15	734.388	0.07	50	30.51	1xCarbamidomethyl [C14]	0.000156394	1		1	3332504	1	K.KLEEEQIILEDQNCKLAK.E	[975-992]	Used	Used
	P35579	Myosin-9 OS=Homo sapiens OX=9606 GN=MYH9 PE=1 SV=4	KLEEEQIILEDQNCK	2	1	1888.93	944.97	-0.18	69	29.21	1xCarbamidomethyl [C14]	0.000156394	1		1	1.4383e+06	2	K.KLEEEQIILEDQNCK.L	[975-989]	Used	Used
	P35579	Myosin-9 OS=Homo sapiens OX=9606 GN=MYH9 PE=1 SV=4	LKSMEAEMIQLQEELAAAER	3	1	2290.14	764.052	0.28	51	55.51		0.000156394	1		1	490350	1	K.LKSMEAEMIQLQEELAAAER.A	[1675-1694]	Used	Used
	P35579	Myosin-9 OS=Homo sapiens OX=9606 GN=MYH9 PE=1 SV=4	LKKLEEEQIILEDQNCK	2	2	2130.11	710.708	-0.33	27	29.13	1xCarbamidomethyl [C16]	0.000156394	1		1	1.21599e+06	1	K.LKKLEEEQIILEDQNCK.L	[973-989]	Used	Used
	P35579	Myosin-9 OS=Homo sapiens OX=9606 GN=MYH9 PE=1 SV=4	LLEDRIAEFTTNLTEEEEKSK	3	2	2495.25	832.422	0.62	39	47		0.000156394	1		1	4.10739e+06	1	K.LLEDRIAEFTTNLTEEEEKSK.S	[996-1016]	Used	Used
	P35579	Myosin-9 OS=Homo sapiens OX=9606 GN=MYH9 PE=1 SV=4	TRLQQELDDLLVDLDHQR	4	1	2207.14	736.385	-0.07	48	57.61		0.000156394	1		1	1.42896e+06	2	K.TRLQQELDDLLVDLDHQR.Q	[1416-1433]	Used	Used
	P35579	Myosin-9 OS=Homo sapiens OX=9606 GN=MYH9 PE=1 SV=4	TVGQLYKEQLAK	2	1	1377.77	689.389	-1.77	48	24.46		0.000156394	1		1	2.91705e+06	1	R.TVGQLYKEQLAK.L	[645-656]	Used	Used
	P35579	Myosin-9 OS=Homo sapiens OX=9606 GN=MYH9 PE=1 SV=4	TLEEEAKTHEAQIQEMR	5	1	2042.98	1021.99	-0.25	63	29.48		0.000156394	1		1	1.37768e+07	3	K.TLEEEAKTHEAQIQEMR.Q	[1175-1191]	Used	Used
	P35579	Myosin-9 OS=Homo sapiens OX=9606 GN=MYH9 PE=1 SV=4	YKASITALEAK	2	1	1194.67	597.84	0.13	32	25.43		0.000156394	1		1	2.34861e+06	1	K.YKASITALEAK.I	[1805-1815]	Used	Used
	P35579	Myosin-9 OS=Homo sapiens OX=9606 GN=MYH9 PE=1 SV=4	VKLQEMEGTVK	2	1	1261.68	631.345	0.06	27	23.61		0.000156394	1		1	3.42403e+06	1	K.VKLQEMEGTVK.S	[1792-1802]	Used	Used
	P35579	Myosin-9 OS=Homo sapiens OX=9606 GN=MYH9 PE=1 SV=4	VSHLLGINVTDFTR	4	0	1571.85	786.431	0	60	44.56		0.000156394	1		1	2.86392e+06	2	K.VSHLLGINVTDFTR.G	[374-387]	Used	Used
	P35579	Myosin-9 OS=Homo sapiens OX=9606 GN=MYH9 PE=1 SV=4	VIQYLAYVASSHK	1	0	1478.8	739.903	-0.44	36	36.21		0.000156394	1		1	414614	1	K.VIQYLAYVASSHK.S	[187-199]	Used	Used
	P35579; Q7Z406	Myosin-9 OS=Homo sapiens OX=9606 GN=MYH9 PE=1 SV=4 Myosin-14 OS=Homo sapiens OX=9606 GN=MYH14 PE=1 SV=2	QLLQANPILEAFGNAK	1	0	1726.95	863.977	-0.77	52	54.97		0.000156394	3		2	112901	1	R.QLLQANPILEAFGNAK.T	[210-225]	Not Used	Not Used
	P35579	Myosin-9 OS=Homo sapiens OX=9606 GN=MYH9 PE=1 SV=4	QLEEAEEEAQRANASRR	2	2	1986.96	662.991	-0.11	30	19.95		0.000156394	1		1	2655453	1	R.QLEEAEEEAQRANASRR.K	[1878-1894]	Used	Used
	P35579	Myosin-9 OS=Homo sapiens OX=9606 GN=MYH9 PE=1 SV=4	RQLEEAEEEAQRANASR	2	2	1986.96	662.991	0.52	15	20.73		0.000156394	1		1	1.82048e+06	1	K.RQLEEAEEEAQRANASR.R	[1877-1893]	Used	Used
	P35579	Myosin-9 OS=Homo sapiens OX=9606 GN=MYH9 PE=1 SV=4	TELADKVTKLQVELDNVTGLLSQSDSK	1	2	2931.55	977.856	0.3	58			0.000156394	1		1			R.TELADKVTKLQVELDNVTGLLSQSDSK.S	[1269-1295]	Not Used	Not Used
	P35579	Myosin-9 OS=Homo sapiens OX=9606 GN=MYH9 PE=1 SV=4	TEMEDLMSSKDDVGK	2	1	1684.74	842.873	-0.66	31	29.51		0.000156394	1		1	666437	1	R.TEMEDLMSSKDDVGK.S	[1504-1518]	Used	Used
	P35579	Myosin-9 OS=Homo sapiens OX=9606 GN=MYH9 PE=1 SV=4	SMEAEMIQLQEELAAAERAKR	2	2	2404.2	802.071	0.46	50	50.27		0.000156394	1		1	946761	1	K.SMEAEMIQLQEELAAAERAKR.Q	[1677-1697]	Used	Used
	P35579	Myosin-9 OS=Homo sapiens OX=9606 GN=MYH9 PE=1 SV=4	SMEAEMIQLQEELAAAER	2	0	2048.96	1024.98	-0.14	67			0.000156394	1		1			K.SMEAEMIQLQEELAAAER.A	[1677-1694]	Not Used	Not Used
	P35579	Myosin-9 OS=Homo sapiens OX=9606 GN=MYH9 PE=1 SV=4	ANLQIDQINTDLNLER	2	0	1869.97	935.487	-0.14	95	43		0.000156394	1		1	623320	1	K.ANLQIDQINTDLNLER.S	[1755-1770]	Used	Used
	P35579	Myosin-9 OS=Homo sapiens OX=9606 GN=MYH9 PE=1 SV=4	AQQAADKYLYVDKNFINNPLAQADWAAK	2	2	3208.61	1070.21	-0.69	38	52.32	1xAcetyl [N-Term]	0.000156394	1		1	5.76123e+06	1	M.AQQAADKYLYVDKNFINNPLAQADWAAK.K	[2-29]	Used	Used
	P35579	Myosin-9 OS=Homo sapiens OX=9606 GN=MYH9 PE=1 SV=4	AKQTLENERGELANEVK	3	2	1929	643.673	0.19	16	23.26		0.000156394	1		1	6.29914e+06	2	K.AKQTLENERGELANEVK.V	[1218-1234]	Used	Used
	P35579	Myosin-9 OS=Homo sapiens OX=9606 GN=MYH9 PE=1 SV=4	GALALEEKR	2	1	986.563	493.785	0.22	46	19.77		0.000156394	1		1	3.24587e+06	1	K.GALALEEKR.R	[1717-1725]	Used	Used
	P35579	Myosin-9 OS=Homo sapiens OX=9606 GN=MYH9 PE=1 SV=4	ALEQQVEEMKTQLEELEDELQATEDAK	1	1	3147.49	1049.83	0.01	32			0.000156394	1		1			R.ALEQQVEEMKTQLEELEDELQATEDAK.L	[1529-1555]	Not Used	Not Used
	P35579	Myosin-9 OS=Homo sapiens OX=9606 GN=MYH9 PE=1 SV=4	ALEEAMEQKAELER	3	1	1646.81	823.907	0.5	77	27.68		0.000156394	1		1	2.25491e+06	2	R.ALEEAMEQKAELER.L	[1484-1497]	Used	Used
	P35579	Myosin-9 OS=Homo sapiens OX=9606 GN=MYH9 PE=1 SV=4	ALEEAMEQKAELERLNK	2	2	2002.03	668.014	0.69	25	30.05		0.000156394	1		1	942555	1	R.ALEEAMEQKAELERLNK.Q	[1484-1500]	Used	Used
	P35579	Myosin-9 OS=Homo sapiens OX=9606 GN=MYH9 PE=1 SV=4	DFSALESQLQDTQELLQEENRQK	2	1	2749.33	917.114	-0.24	50	52.55		0.000156394	1		1	2.63245e+06	1	K.DFSALESQLQDTQELLQEENRQK.L	[1302-1324]	Used	Used
	P35579	Myosin-9 OS=Homo sapiens OX=9606 GN=MYH9 PE=1 SV=4	DFSALESQLQDTQELLQEENRQKLSLSTK	2	2	3378.7	845.431	0.08	2	52.62		0.000156394	1		1	683621	1	K.DFSALESQLQDTQELLQEENRQKLSLSTK.L	[1302-1330]	Used	Used
	P35579	Myosin-9 OS=Homo sapiens OX=9606 GN=MYH9 PE=1 SV=4	DLGEELEALKTELEDTLDSTAAQQELR	2	1	3017.48	1006.5	-0.15	33	63.62		0.000156394	1		1	1.42749e+06	1	R.DLGEELEALKTELEDTLDSTAAQQELR.S	[1136-1162]	Used	Used
	P35579	Myosin-9 OS=Homo sapiens OX=9606 GN=MYH9 PE=1 SV=4	DLGEELEALKTELEDTLDSTAAQQELRSK	1	2	3232.61	1078.21	-0.26	30			0.000156394	1		1			R.DLGEELEALKTELEDTLDSTAAQQELRSK.R	[1136-1164]	Not Used	Not Used
	P35579	Myosin-9 OS=Homo sapiens OX=9606 GN=MYH9 PE=1 SV=4	ELEDATETADAMNREVSSLKNK	2	2	2451.17	817.727	0.15	50	37.46		0.000156394	1		1	6507608	1	R.ELEDATETADAMNREVSSLKNK.L	[1899-1920]	Used	Used
	P35579	Myosin-9 OS=Homo sapiens OX=9606 GN=MYH9 PE=1 SV=4	ELEDATETADAMNREVSSLK	1	1	2209.03	1105.02	0.15	57	39.8		0.000156394	1		1	627446	1	R.ELEDATETADAMNREVSSLK.N	[1899-1918]	Used	Used
	P35579	Myosin-9 OS=Homo sapiens OX=9606 GN=MYH9 PE=1 SV=4	HSQAVEELAEQLEQTKR	6	1	1996.01	998.509	0.16	82	36.72		0.000156394	1		1	1.11966e+07	2	K.HSQAVEELAEQLEQTKR.V	[1194-1210]	Used	Used
	P35579	Myosin-9 OS=Homo sapiens OX=9606 GN=MYH9 PE=1 SV=4	HSQAVEELAEQLEQTK	3	0	1839.91	920.458	-0.15	29	39.81		0.000156394	1		1	1.11808e+06	2	K.HSQAVEELAEQLEQTK.R	[1194-1209]	Used	Used
	P35579	Myosin-9 OS=Homo sapiens OX=9606 GN=MYH9 PE=1 SV=4	KANLQIDQINTDLNLER	4	1	1998.06	999.534	0.02	104	39.06		0.000156394	1		1	4.18811e+06	2	K.KANLQIDQINTDLNLER.S	[1754-1770]	Used	Used
	P35579	Myosin-9 OS=Homo sapiens OX=9606 GN=MYH9 PE=1 SV=4	RGDLPFVVPR	5	1	1155.66	578.335	0.29	51	35.27		0.000476848	1		1	34076032	1	R.RGDLPFVVPR.R	[1923-1932]	Used	Used
	P35579	Myosin-9 OS=Homo sapiens OX=9606 GN=MYH9 PE=1 SV=4	RGDLPFVVPRR	6	2	1311.76	437.927	0.43	20	33.25		0.000476848	1		1	4.23738e+06	2	R.RGDLPFVVPRR.M	[1923-1933]	Used	Used
	P35579	Myosin-9 OS=Homo sapiens OX=9606 GN=MYH9 PE=1 SV=4	RQLEEAEEEAQR	1	1	1487.71	744.358	0.64	22	17.48		0.000476848	1		1	162342	1	K.RQLEEAEEEAQR.A	[1877-1888]	Used	Used
	P35579	Myosin-9 OS=Homo sapiens OX=9606 GN=MYH9 PE=1 SV=4	VAAYDKLEK	2	1	1036.57	518.787	0.14	19	19.03		0.000476848	1		1	2.63039e+06	1	K.VAAYDKLEK.T	[1405-1413]	Used	Used
	P35579	Myosin-9 OS=Homo sapiens OX=9606 GN=MYH9 PE=1 SV=4	ASITALEAK	1	0	903.515	452.26	-1.15	22	24.17		0.000476848	1		1	599519	1	K.ASITALEAK.I	[1807-1815]	Used	Used
	P35579	Myosin-9 OS=Homo sapiens OX=9606 GN=MYH9 PE=1 SV=4	SMEAEMIQLQEELAAAERAK	1	1	2248.09	750.036	-0.19	14			0.000476848	1		1			K.SMEAEMIQLQEELAAAERAK.R	[1677-1696]	Not Used	Not Used
	P35579	Myosin-9 OS=Homo sapiens OX=9606 GN=MYH9 PE=1 SV=4	VMQEQGTHPK	2	0	1154.56	577.785	0.11	35			0.000476848	1		1			K.VMQEQGTHPK.F	[546-555]	Not Used	Not Used
	P35579	Myosin-9 OS=Homo sapiens OX=9606 GN=MYH9 PE=1 SV=4	IRELESQISELQEDLESER	1	1	2303.14	768.383	-0.23	12	48.51		0.000476848	1		1	487810	1	K.IRELESQISELQEDLESER.A	[1106-1124]	Used	Used
	P35579	Myosin-9 OS=Homo sapiens OX=9606 GN=MYH9 PE=1 SV=4	MEDSVGCLETAEEVKR	2	1	1852.84	926.925	0.55	66	27.88	1xCarbamidomethyl [C7]	0.000476848	1		1	211219	1	K.MEDSVGCLETAEEVKR.K	[1373-1388]	Used	Used
	P35579	Myosin-9 OS=Homo sapiens OX=9606 GN=MYH9 PE=1 SV=4	LKDVLLQVDDERR	2	2	1598.89	533.634	0.02	20	30.35		0.000476848	1		1	1.62997e+06	1	K.LKDVLLQVDDERR.N	[1844-1856]	Used	Used
	P35579	Myosin-9 OS=Homo sapiens OX=9606 GN=MYH9 PE=1 SV=4	EMEAELEDERKQR	3	2	1662.78	554.93	-0.44	17	19.46		0.000476848	1		1	4.59592e+06	1	R.EMEAELEDERKQR.S	[1593-1605]	Used	Used
	P35579	Myosin-9 OS=Homo sapiens OX=9606 GN=MYH9 PE=1 SV=4	EMEAELEDERK	2	1	1378.62	689.812	0.58	41	20.13		0.000476848	1		1	364129	1	R.EMEAELEDERK.Q	[1593-1603]	Used	Used
	P35579	Myosin-9 OS=Homo sapiens OX=9606 GN=MYH9 PE=1 SV=4	QLEEAEEEAQRANASR	3	1	1830.86	610.957	0.16	40	20.98		0.000476848	1		1	3.94074e+06	2	R.QLEEAEEEAQRANASR.R	[1878-1893]	Used	Used
	P35579	Myosin-9 OS=Homo sapiens OX=9606 GN=MYH9 PE=1 SV=4	QLEEAEEEAQR	1	0	1331.61	666.307	-0.01	37			0.000476848	1		1			R.QLEEAEEEAQR.A	[1878-1888]	Not Used	Not Used
	P35579	Myosin-9 OS=Homo sapiens OX=9606 GN=MYH9 PE=1 SV=4	MQQNIQELEEQLEEEESAR	1	0	2333.06	778.357	0.39	9			0.000476848	1		1			K.MQQNIQELEEQLEEEESAR.Q	[941-959]	Not Used	Not Used
	P35579	Myosin-9 OS=Homo sapiens OX=9606 GN=MYH9 PE=1 SV=4	MQQNIQELEEQLEEEESARQK	1	1	2589.21	863.741	-0.55	8	41.45		0.000476848	1		1	920870	1	K.MQQNIQELEEQLEEEESARQK.L	[941-961]	Used	Used
	P35579	Myosin-9 OS=Homo sapiens OX=9606 GN=MYH9 PE=1 SV=4	QTLENERGELANEVK	2	1	1729.87	865.44	0.45	54	25.27		0.000476848	1		1	474155	1	K.QTLENERGELANEVK.V	[1220-1234]	Used	Used
	P35580; P35579	Myosin-10 OS=Homo sapiens OX=9606 GN=MYH10 PE=1 SV=3 Myosin-9 OS=Homo sapiens OX=9606 GN=MYH9 PE=1 SV=4	AGKLDPHLVLDQLR	2	1	1574.9	525.639	0.01	6	39.05		0.00186582	2		2	1.17333e+06	1	K.AGKLDPHLVLDQLR.C	[680-693]	Not Used	Not Used
	P35580; P35579	Myosin-10 OS=Homo sapiens OX=9606 GN=MYH10 PE=1 SV=3 Myosin-9 OS=Homo sapiens OX=9606 GN=MYH9 PE=1 SV=4	CIIPNHEK	1	0	1010.51	505.758	-0.08	8	18.52	1xCarbamidomethyl [C1]	0.00251508	3		2	721424	1	R.CIIPNHEK.K	[671-678]	Not Used	Not Used
	P35579	Myosin-9 OS=Homo sapiens OX=9606 GN=MYH9 PE=1 SV=4	EQEVNILKK	1	1	1100.63	550.819	0.28	22	21.5		0.00546604	1		1	3.87708e+06	1	R.EQEVNILKK.T	[1166-1174]	Used	Used
P62328	Thymosin beta-4 OS=Homo sapiens OX=9606 GN=TMSB4X PE=1 SV=2	91	44	5.1	5.06	0	303	1	4	4	27	1.85339e+08	6	0.00366151
	Master Protein Accessions	Master Protein Descriptions	Sequence	# PSMs	# Missed Cleavages	Theo. MH+ [Da]	m/z [Da] (by Search Engine): Mascot	DeltaM [ppm] (by Search Engine): Mascot	Ions Score (by Search Engine): Mascot	Top Apex RT [min]	Modifications	Qvality q-value	# Proteins		# Protein Groups	Abundance: F1763: n/a, Sample, n/a, n/a	Abundances Count: F1763: n/a, Sample, n/a, n/a	Sequence in Protein	Positions in Proteins	Quan Usage	Quan Ratio Usage
	P62328	Thymosin beta-4 OS=Homo sapiens OX=9606 GN=TMSB4X PE=1 SV=2	NPLPSKETIEQEKQAGES	3	2	1984.98	992.995	0.21	27	21.38		0.000156394	1		1	1.00809e+06	2	K.NPLPSKETIEQEKQAGES.-	[27-44]	Used	Used
	P62328	Thymosin beta-4 OS=Homo sapiens OX=9606 GN=TMSB4X PE=1 SV=2	TETQEKNPLPSKETIEQEK	2	2	2229.12	743.713	0	17	21.37		0.000156394	1		1	2.86286e+06	1	K.TETQEKNPLPSKETIEQEK.Q	[21-39]	Used	Used
	P62328	Thymosin beta-4 OS=Homo sapiens OX=9606 GN=TMSB4X PE=1 SV=2	SDKPDMAEIEKFDKSK	4	2	1925.92	482.235	0.64	18	23.47	1xAcetyl [N-Term]; 1xOxidation [M6]	0.000156394	1		1	6.01615e+06	3	M.SDKPDMAEIEKFDKSK.L	[2-17]	Used	Used
	P62328	Thymosin beta-4 OS=Homo sapiens OX=9606 GN=TMSB4X PE=1 SV=2	SDKPDMAEIEKFDKSK	12	2	1909.92	478.236	0.05	28	29.8	1xAcetyl [N-Term]	0.000156394	1		1	122839502	3	M.SDKPDMAEIEKFDKSK.L	[2-17]	Used	Used
	P62328	Thymosin beta-4 OS=Homo sapiens OX=9606 GN=TMSB4X PE=1 SV=2	SDKPDMAEIEKFDK	4	1	1694.79	565.603	0.09	35	32.96	1xAcetyl [N-Term]	0.000156394	1		1	51706890	2	M.SDKPDMAEIEKFDK.S	[2-15]	Used	Used
	P62328	Thymosin beta-4 OS=Homo sapiens OX=9606 GN=TMSB4X PE=1 SV=2	SDKPDMAEIEKFDK	2	1	1710.79	855.898	-0.53	23	25.69	1xAcetyl [N-Term]; 1xOxidation [M6]	0.000476848	1		1	905212	1	M.SDKPDMAEIEKFDK.S	[2-15]	Used	Used
P39019	40S ribosomal protein S19 OS=Homo sapiens OX=9606 GN=RPS19 PE=1 SV=2	75	145	16.1	10.32	0	890	1	13	13	72	1.65051e+08	13	0.00976404
	Master Protein Accessions	Master Protein Descriptions	Sequence	# PSMs	# Missed Cleavages	Theo. MH+ [Da]	m/z [Da] (by Search Engine): Mascot	DeltaM [ppm] (by Search Engine): Mascot	Ions Score (by Search Engine): Mascot	Top Apex RT [min]	Modifications	Qvality q-value	# Proteins		# Protein Groups	Abundance: F1763: n/a, Sample, n/a, n/a	Abundances Count: F1763: n/a, Sample, n/a, n/a	Sequence in Protein	Positions in Proteins	Quan Usage	Quan Ratio Usage
	P39019	40S ribosomal protein S19 OS=Homo sapiens OX=9606 GN=RPS19 PE=1 SV=2	PGVTVKDVNQQEFVR	6	1	1715.91	858.457	-0.45	72	27.79		0.000156394	1		1	2.35552e+07	4	M.PGVTVKDVNQQEFVR.A	[2-16]	Used	Used
	P39019	40S ribosomal protein S19 OS=Homo sapiens OX=9606 GN=RPS19 PE=1 SV=2	LKVPEWVDTVKLAK	6	2	1625.96	542.659	0.45	29	41.33		0.000156394	1		1	6.96247e+06	2	K.LKVPEWVDTVKLAK.H	[28-41]	Used	Used
	P39019	40S ribosomal protein S19 OS=Homo sapiens OX=9606 GN=RPS19 PE=1 SV=2	VLQALEGLKMVEKDQDGGR	2	2	2086.1	696.037	0.57	37	39.04		0.000156394	1		1	3.25962e+06	1	R.VLQALEGLKMVEKDQDGGR.K	[103-121]	Used	Used
	P39019	40S ribosomal protein S19 OS=Homo sapiens OX=9606 GN=RPS19 PE=1 SV=2	SGKLKVPEWVDTVK	6	2	1585.89	529.303	-0.3	4	34.98		0.000156394	1		1	8.07602e+06	2	K.SGKLKVPEWVDTVK.L	[25-38]	Used	Used
	P39019	40S ribosomal protein S19 OS=Homo sapiens OX=9606 GN=RPS19 PE=1 SV=2	ALAAFLKK	3	1	861.556	431.281	-0.5	54	28.22		0.000156394	1		1	36874496	1	R.ALAAFLKK.S	[17-24]	Used	Used
	P39019	40S ribosomal protein S19 OS=Homo sapiens OX=9606 GN=RPS19 PE=1 SV=2	DLDRIAGQVAAANK	2	1	1441.78	721.391	-0.95	32	28.26		0.000156394	1		1	977863	1	R.DLDRIAGQVAAANK.K	[130-143]	Used	Used
	P39019	40S ribosomal protein S19 OS=Homo sapiens OX=9606 GN=RPS19 PE=1 SV=2	HKELAPYDENWFYTR	27	1	1968.92	656.98	0.67	35	52.73		0.000156394	1		1	5.18343e+06	7	K.HKELAPYDENWFYTR.A	[42-56]	Used	Used
	P39019	40S ribosomal protein S19 OS=Homo sapiens OX=9606 GN=RPS19 PE=1 SV=2	RVLQALEGLK	4	1	1126.69	563.851	0.34	26	32.22		0.000476848	1		1	35012776	1	R.RVLQALEGLK.M	[102-111]	Used	Used
	P39019	40S ribosomal protein S19 OS=Homo sapiens OX=9606 GN=RPS19 PE=1 SV=2	VPEWVDTVKLAK	2	1	1384.78	692.895	-0.21	28	37.54		0.000476848	1		1	382327	1	K.VPEWVDTVKLAK.H	[30-41]	Used	Used
	P39019	40S ribosomal protein S19 OS=Homo sapiens OX=9606 GN=RPS19 PE=1 SV=2	IAGQVAAANKKH	5	2	1207.69	604.348	-0.8	22	15.52		0.000476848	1		1	7265260	1	R.IAGQVAAANKKH.-	[134-145]	Used	Used
	P39019	40S ribosomal protein S19 OS=Homo sapiens OX=9606 GN=RPS19 PE=1 SV=2	LKVPEWVDTVK	5	1	1313.75	438.587	-0.1	25	38.3		0.000476848	1		1	2.25855e+07	2	K.LKVPEWVDTVK.L	[28-38]	Used	Used
	P39019	40S ribosomal protein S19 OS=Homo sapiens OX=9606 GN=RPS19 PE=1 SV=2	KLTPQGQR	2	1	927.537	464.272	-0.67	24	15.19		0.00117376	1		1	12503748	1	R.KLTPQGQR.D	[122-129]	Used	Used
	P39019	40S ribosomal protein S19 OS=Homo sapiens OX=9606 GN=RPS19 PE=1 SV=2	NGVMPSHFSR	2	0	1131.54	566.272	0.39	18	21.47		0.00151892	1		1	2.41276e+06	1	R.NGVMPSHFSR.G	[85-94]	Used	Used
P62263	40S ribosomal protein S14 OS=Homo sapiens OX=9606 GN=RPS14 PE=1 SV=3	43	151	16.3	10.05	0	730	1	10	10	45	1.53264e+08	10	0.00610252
	Master Protein Accessions	Master Protein Descriptions	Sequence	# PSMs	# Missed Cleavages	Theo. MH+ [Da]	m/z [Da] (by Search Engine): Mascot	DeltaM [ppm] (by Search Engine): Mascot	Ions Score (by Search Engine): Mascot	Top Apex RT [min]	Modifications	Qvality q-value	# Proteins		# Protein Groups	Abundance: F1763: n/a, Sample, n/a, n/a	Abundances Count: F1763: n/a, Sample, n/a, n/a	Sequence in Protein	Positions in Proteins	Quan Usage	Quan Ratio Usage
	P62263	40S ribosomal protein S14 OS=Homo sapiens OX=9606 GN=RPS14 PE=1 SV=3	IEDVTPIPSDSTR	2	0	1429.72	715.362	-0.12	53	25.36		0.000156394	1		1	1.00593e+06	1	R.IEDVTPIPSDSTR.R	[129-141]	Used	Used
	P62263	40S ribosomal protein S14 OS=Homo sapiens OX=9606 GN=RPS14 PE=1 SV=3	IGRIEDVTPIPSDSTRR	10	2	1912.02	638.013	-0.17	35	26.97		0.000156394	1		1	49529476	3	K.IGRIEDVTPIPSDSTRR.K	[126-142]	Used	Used
	P62263	40S ribosomal protein S14 OS=Homo sapiens OX=9606 GN=RPS14 PE=1 SV=3	IGRIEDVTPIPSDSTR	4	1	1755.92	585.979	-0.17	19	28.95		0.000156394	1		1	27598066	2	K.IGRIEDVTPIPSDSTR.R	[126-141]	Used	Used
	P62263	40S ribosomal protein S14 OS=Homo sapiens OX=9606 GN=RPS14 PE=1 SV=3	TPGPGAQSALR	2	0	1054.56	527.786	-0.03	37	18.61		0.000156394	1		1	8456281	1	K.TPGPGAQSALR.A	[107-117]	Used	Used
	P62263	40S ribosomal protein S14 OS=Homo sapiens OX=9606 GN=RPS14 PE=1 SV=3	VKADRDESSPYAAMLAAQDVAQR	11	2	2492.22	831.411	0.03	52	36.36		0.000156394	1		1	3.12763e+07	4	K.VKADRDESSPYAAMLAAQDVAQR.C	[62-84]	Used	Used
	P62263	40S ribosomal protein S14 OS=Homo sapiens OX=9606 GN=RPS14 PE=1 SV=3	CKELGITALHIK	3	1	1382.78	691.895	-0.2	27	32.22	1xCarbamidomethyl [C1]	0.000156394	1		1	2.23328e+06	1	R.CKELGITALHIK.L	[85-96]	Used	Used
	P62263	40S ribosomal protein S14 OS=Homo sapiens OX=9606 GN=RPS14 PE=1 SV=3	ADRDESSPYAAMLAAQDVAQR	4	1	2265.06	1133.03	-0.61	96	38.44		0.000156394	1		1	2.84985e+06	2	K.ADRDESSPYAAMLAAQDVAQR.C	[64-84]	Used	Used
	P62263	40S ribosomal protein S14 OS=Homo sapiens OX=9606 GN=RPS14 PE=1 SV=3	TKTPGPGAQSALR	5	1	1283.71	428.574	0.2	21	17.44		0.000476848	1		1	20819690	2	R.TKTPGPGAQSALR.A	[105-117]	Used	Used
	P62263	40S ribosomal protein S14 OS=Homo sapiens OX=9606 GN=RPS14 PE=1 SV=3	IEDVTPIPSDSTRR	2	1	1585.82	793.413	0.79	31	23.44		0.000476848	1		1	4.88545e+06	1	R.IEDVTPIPSDSTRR.K	[129-142]	Used	Used
	P62263	40S ribosomal protein S14 OS=Homo sapiens OX=9606 GN=RPS14 PE=1 SV=3	ELGITALHIK	2	0	1094.66	547.832	0.17	38	36.13		0.000476848	1		1	4.60962e+06	1	K.ELGITALHIK.L	[87-96]	Used	Used
P36578	60S ribosomal protein L4 OS=Homo sapiens OX=9606 GN=RPL4 PE=1 SV=5	46	427	47.7	11.06	0	953	1	19	19	56	1.49498e+08	19	0.00759425
	Master Protein Accessions	Master Protein Descriptions	Sequence	# PSMs	# Missed Cleavages	Theo. MH+ [Da]	m/z [Da] (by Search Engine): Mascot	DeltaM [ppm] (by Search Engine): Mascot	Ions Score (by Search Engine): Mascot	Top Apex RT [min]	Modifications	Qvality q-value	# Proteins		# Protein Groups	Abundance: F1763: n/a, Sample, n/a, n/a	Abundances Count: F1763: n/a, Sample, n/a, n/a	Sequence in Protein	Positions in Proteins	Quan Usage	Quan Ratio Usage
	P36578	60S ribosomal protein L4 OS=Homo sapiens OX=9606 GN=RPL4 PE=1 SV=5	LRVDKAAAAAAALQAK	4	2	1567.93	523.314	-0.67	46	26.7		0.000156394	1		1	12232418	1	K.LRVDKAAAAAAALQAK.S	[349-364]	Used	Used
	P36578	60S ribosomal protein L4 OS=Homo sapiens OX=9606 GN=RPL4 PE=1 SV=5	NNRQPYAVSELAGHQTSAESWGTGR	7	1	2716.28	906.1	0.77	55	31.22		0.000156394	1		1	1.58057e+07	2	K.NNRQPYAVSELAGHQTSAESWGTGR.A	[47-71]	Used	Used
	P36578	60S ribosomal protein L4 OS=Homo sapiens OX=9606 GN=RPL4 PE=1 SV=5	VDKAAAAAAALQAK	2	1	1298.74	649.875	-0.19	45	21.68		0.000156394	1		1	3.02009e+06	1	R.VDKAAAAAAALQAK.S	[351-364]	Used	Used
	P36578	60S ribosomal protein L4 OS=Homo sapiens OX=9606 GN=RPL4 PE=1 SV=5	YAICSALAASALPALVMSK	2	0	1937.02	969.015	-0.79	35	55.62	1xCarbamidomethyl [C4]	0.000156394	1		1	343200	1	R.YAICSALAASALPALVMSK.G	[122-140]	Used	Used
	P36578	60S ribosomal protein L4 OS=Homo sapiens OX=9606 GN=RPL4 PE=1 SV=5	SGQGAFGNMCR	2	0	1184.49	592.75	-0.18	53	22.72	1xCarbamidomethyl [C10]	0.000156394	1		1	6740248	1	R.SGQGAFGNMCR.G	[87-97]	Used	Used
	P36578	60S ribosomal protein L4 OS=Homo sapiens OX=9606 GN=RPL4 PE=1 SV=5	APIRPDIVNFVHTNLR	5	0	1862.04	621.352	0.59	34	41.47		0.000156394	1		1	5.40462e+06	2	K.APIRPDIVNFVHTNLR.K	[30-45]	Used	Used
	P36578	60S ribosomal protein L4 OS=Homo sapiens OX=9606 GN=RPL4 PE=1 SV=5	ACARPLISVYSEKGESSGK	6	1	2081.03	694.349	0	43	31.17	1xAcetyl [N-Term]; 1xCarbamidomethyl [C2]	0.000156394	1		1	3.70083e+07	2	M.ACARPLISVYSEKGESSGK.N	[2-20]	Used	Used
[truncated: 3,707 more rows]
